# Supplementary material
Source: PubMed Central journal article supplement (PMC4707835)
Supplement: npp2015218x1.pdf [file npp2015218x1.pdf]

**Supplementary Table S1: Zsummary statistics for module preservation**

| Module         | moduleSize | medianRank.pres | Zsummary | Eigengene-BD correlation in NISC1/NISC2 | Comment                     |
|----------------|------------|-----------------|----------|-----------------------------------------|-----------------------------|
| green          | 908        | 6               | 53       | -/-                                     | Included                    |
| turquoise      | 2766       | 19              | 53       | -/-                                     | Included                    |
| yellow         | 959        | 10              | 52       | +/+                                     | Included                    |
| blue           | 1523       | 16              | 48       | -/-                                     | Included                    |
| red            | 847        | 11              | 43       | -/-                                     | Included                    |
| purple         | 442        | 2               | 37       | +/+                                     | Included                    |
| midnightblue   | 282        | 17              | 30       | -/-                                     | Included                    |
| salmon         | 293        | 4               | 29       | -/-                                     | Included                    |
| darkgreen      | 175        | 4               | 25       | -/-                                     | Included                    |
| royalblue      | 179        | 1               | 24       | +/+                                     | Included                    |
| lightcyan      | 254        | 12              | 24       | +/+                                     | Included                    |
| lightyellow    | 209        | 17              | 21       | +/+                                     | Included                    |
| darkturquoise  | 166        | 14              | 20       | -/-                                     | Included                    |
| darkgrey       | 166        | 21              | 17       | +/+                                     | Included                    |
| skyblue        | 135        | 12              | 17       | +/+                                     | Included                    |
| darkorange     | 141        | 25              | 17       | -/-                                     | Included                    |
| saddlebrown    | 133        | 22              | 16       | +/+                                     | Included                    |
| white          | 141        | 29              | 15       | +/+                                     | Included                    |
| darkred        | 179        | 33              | 15       | +/+                                     | Included                    |
| paleturquoise  | 100        | 22              | 14       | -/-                                     | Included                    |
| darkolivegreen | 74         | 29              | 10       | +/+                                     | Included                    |
| pink           | 559        | 7               | 42       | +/-                                     | Excluded opposite direction |
| black          | 777        | 6               | 41       | +/-                                     | Excluded opposite direction |
| brown          | 1012       | 28              | 39       | -/+                                     | Excluded opposite direction |
| tan            | 338        | 18              | 31       | +/-                                     | Excluded opposite direction |
| magenta        | 519        | 17              | 30       | -/+                                     | Excluded opposite direction |
| cyan           | 286        | 23              | 28       | -/+                                     | Excluded opposite direction |
| greenyellow    | 394        | 22              | 28       | +/-                                     | Excluded opposite direction |
| grey60         | 212        | 26              | 20       | -/+                                     | Excluded opposite direction |
| lightgreen     | 211        | 27              | 19       | +/-                                     | Excluded opposite direction |
| orange         | 150        | 8               | 18       | +/-                                     | Excluded opposite direction |
| violet         | 99         | 13              | 14       | -/+                                     | Excluded opposite direction |
| steelblue      | 101        | 32              | 13       | +/-                                     | Excluded opposite direction |
| grey           | 1841       | 35              | -2.5     | -/+                                     | Excluded opposite direction |

Supplementary Table S2: Comparison of brain transcriptome modules generated using RNA-seq (this study) and microarray (Oldham et al., 2008)

| Bipolar Disorder Networks |         | Preservation of normal human brain |                 |                   |                  | Cell composition                      |
|---------------------------|---------|------------------------------------|-----------------|-------------------|------------------|---------------------------------------|
| Module Color              | N genes | Oldham et al (2008) module         | Overlap p-value | Corrected p-value | Gene overlap (%) | Oldham et al (2008) module annotation |
| pink                      | 559     | M9A                                | <1.0E-16        | <1.0E-16          | 80               | oligodendrocytes                      |
| lightyellow               | 209     | M9A                                | <1.0E-16        | <1.0E-16          | 58               | oligodendrocytes                      |
| black                     | 777     | M9A                                | <1.0E-16        | <1.0E-16          | 50               | oligodendrocytes                      |
| salmon                    | 293     | M9A                                | <1.0E-16        | <1.0E-16          | 50               | oligodendrocytes                      |
| skyblue                   | 135     | M9A                                | 1.5E-05         | 9.4E-03           | 50               | oligodendrocytes                      |
| yellow                    | 959     | M15A                               | <1.0E-16        | <1.0E-16          | 49               | astrocytes                            |
| orange                    | 150     | M18A                               | 3.9E-08         | 2.5E-05           | 44               | neurons, synaptic proteins            |
| darkturquoise             | 166     | M18A                               | 3.7E-10         | 2.3E-07           | 43               | neurons, synaptic proteins            |
| darkgrey                  | 166     | M16A                               | 8.0E-07         | 5.0E-04           | 38               | neurons                               |
| paleturquoise             | 100     | M4A                                | 1.7E-12         | 1.1E-09           | 36               | microglia                             |
| magenta                   | 519     | M9A                                | 1.2E-14         | 7.3E-12           | 36               | oligodendrocytes                      |
| saddlebrown               | 133     | M18A                               | 2.7E-05         | 1.7E-02           | 33               | neurons, synaptic proteins            |
| steelblue                 | 101     | M18A                               | 2.7E-05         | 1.7E-02           | 33               | neurons, synaptic proteins            |
| purple                    | 442     | M15A                               | <1.0E-16        | <1.0E-16          | 33               | astrocytes                            |
| brown                     | 1012    | M18A                               | <1.0E-16        | <1.0E-16          | 32               | neurons, synaptic proteins            |
| cyan                      | 286     | M15A                               | 4.9E-13         | 3.1E-10           | 32               | astrocytes                            |
| lightcyan                 | 254     | M18A                               | 8.9E-07         | 5.6E-04           | 32               | neurons, synaptic proteins            |
| grey60                    | 212     | M18A                               | 5.6E-09         | 3.5E-06           | 31               | neurons, synaptic proteins            |
| turquoise                 | 2766    | M18A                               | <1.0E-16        | <1.0E-16          | 31               | neurons, synaptic proteins            |
| darkred                   | 179     | M18A                               | 2.9E-04         | ns                | 30               | neurons, synaptic proteins            |
| royalblue                 | 179     | M18A                               | 3.3E-05         | 2.1E-02           | 30               | neurons, synaptic proteins            |
| green                     | 908     | M9A                                | <1.0E-16        | <1.0E-16          | 30               | oligodendrocytes                      |
| darkorange                | 141     | M18A                               | 4.5E-05         | 2.8E-02           | 29               | neurons, synaptic proteins            |
| tan                       | 338     | M9A                                | 1.6E-08         | 1.0E-05           | 29               | oligodendrocytes                      |
| darkolivegreen            | 74      | M2                                 | 6.7E-10         | 4.2E-07           | 29               | synaptic proteins                     |
| greenyellow               | 394     | M16A                               | 5.6E-10         | 3.5E-07           | 28               | neurons                               |
| midnightblue              | 282     | M10A                               | 6.2E-11         | 3.9E-08           | 28               | synapse, Glu neurons                  |
| lightgreen                | 211     | M10A                               | 1.1E-09         | 6.8E-07           | 27               | synapse, Glu neurons                  |
| violet                    | 99      | M15A                               | 1.7E-04         | ns                | 26               | astrocytes                            |
| darkgreen                 | 175     | M18A                               | 3.2E-04         | ns                | 26               | neurons, synaptic proteins            |
| blue                      | 1523    | M15A                               | <1.0E-16        | <1.0E-16          | 21               | astrocytes                            |
| blue                      | 1523    | M10A                               | <1.0E-16        | <1.0E-16          | 21               | synapse, Glu neurons                  |
| red                       | 847     | M10A                               | <1.0E-16        | <1.0E-16          | 21               | synapse, Glu neurons                  |
| white                     | 141     | M19A                               | 4.1E-04         | ns                | 20               |                                       |

ns=not significant

Supplementary Table S3: Genes in 21 modules and their kME values (module membership values)

| geneName    | Module | kME_NISC1 | kME_NISC2 |
|-------------|--------|-----------|-----------|
| MARCH5      | blue   | -0.733    | -0.922    |
| MARCH9      | blue   | 0.966     | 0.834     |
| SEPT5       | blue   | 0.909     | 0.944     |
| SEPT6       | blue   | 0.688     | 0.762     |
| A1BG        | blue   | 0.500     | 0.462     |
| AAK1        | blue   | 0.629     | 0.848     |
| ABCA7       | blue   | 0.861     | 0.740     |
| ABCB7       | blue   | -0.811    | -0.865    |
| ABCC12      | blue   | 0.724     | 0.850     |
| ABCC4       | blue   | -0.674    | -0.723    |
| ABHD12      | blue   | 0.878     | 0.873     |
| ABI1        | blue   | -0.760    | -0.801    |
| ABL2        | blue   | -0.426    | -0.589    |
| ABLIM1      | blue   | -0.912    | -0.805    |
| AC002055.4  | blue   | 0.602     | 0.689     |
| AC004847.1  | blue   | 0.907     | 0.887     |
| AC004985.13 | blue   | 0.854     | 0.781     |
| AC005104.3  | blue   | -0.478    | -0.564    |
| AC005971.3  | blue   | -0.271    | -0.621    |
| AC007384.1  | blue   | -0.725    | -0.745    |
| AC008537.2  | blue   | 0.542     | 0.307     |
| AC010226.4  | blue   | -0.635    | -0.835    |
| AC011498.1  | blue   | 0.818     | 0.765     |
| AC015933.2  | blue   | -0.534    | -0.636    |
| AC016629.2  | blue   | 0.841     | 0.478     |
| AC016722.2  | blue   | 0.782     | 0.754     |
| AC017116.8  | blue   | 0.468     | 0.805     |
| AC023356.3  | blue   | 0.322     | 0.571     |
| AC024575.1  | blue   | 0.673     | 0.872     |
| AC027612.6  | blue   | 0.840     | 0.742     |
| AC062028.1  | blue   | 0.956     | 0.809     |
| AC084125.4  | blue   | 0.801     | 0.823     |
| AC098831.4  | blue   | -0.684    | -0.424    |
| AC114772.1  | blue   | -0.617    | -0.839    |
| AC129929.5  | blue   | 0.577     | 0.328     |
| AC147651.3  | blue   | 0.144     | 0.709     |
| ACAP3       | blue   | 0.857     | 0.900     |
| ACCS        | blue   | -0.349    | -0.631    |
| ACOT8       | blue   | 0.897     | 0.897     |
| ACRV1       | blue   | 0.781     | 0.518     |
| ACSF3       | blue   | 0.809     | 0.689     |
| ACTA1       | blue   | 0.709     | 0.877     |
| ACTR3C      | blue   | 0.604     | 0.654     |
| ADAM17      | blue   | -0.397    | -0.597    |

|            |      |        |        |
|------------|------|--------|--------|
| ADAMTS13   | blue | 0.661  | 0.737  |
| ADRA2C     | blue | 0.802  | 0.779  |
| ADRBK1     | blue | 0.932  | 0.908  |
| AGAP3      | blue | 0.965  | 0.975  |
| AHCYL2     | blue | -0.750 | -0.809 |
| AHNAK      | blue | -0.550 | -0.763 |
| AHSA2      | blue | -0.624 | -0.732 |
| AIM1       | blue | -0.524 | -0.571 |
| AIP        | blue | 0.832  | 0.698  |
| AKR1A1     | blue | 0.715  | 0.729  |
| AL137059.1 | blue | -0.724 | -0.684 |
| AL590822.1 | blue | 0.368  | 0.527  |
| ALG2       | blue | -0.602 | -0.763 |
| ALG3       | blue | 0.471  | 0.607  |
| ALKBH6     | blue | -0.360 | -0.271 |
| AMACR      | blue | -0.620 | -0.503 |
| ANGPTL1    | blue | -0.665 | -0.365 |
| ANKAR      | blue | -0.605 | -0.691 |
| ANKRD13B   | blue | 0.819  | 0.897  |
| ANKRD13D   | blue | 0.949  | 0.730  |
| ANKRD34A   | blue | 0.788  | 0.786  |
| ANKRD54    | blue | 0.896  | 0.711  |
| ANO6       | blue | -0.807 | -0.826 |
| ANTXR2     | blue | -0.641 | -0.748 |
| AOX1       | blue | -0.724 | -0.721 |
| AP000704.5 | blue | 0.389  | 0.297  |
| AP001816.1 | blue | 0.912  | 0.737  |
| AP1G2      | blue | 0.877  | 0.495  |
| AP1S1      | blue | 0.866  | 0.794  |
| AP2M1      | blue | 0.910  | 0.780  |
| AP3D1      | blue | 0.863  | 0.665  |
| APOA1BP    | blue | 0.835  | 0.798  |
| APPL2      | blue | -0.678 | -0.621 |
| APRT       | blue | 0.781  | 0.899  |
| APTX       | blue | 0.600  | 0.427  |
| AQR        | blue | -0.847 | -0.825 |
| ARF1       | blue | 0.942  | 0.901  |
| ARFGAP3    | blue | -0.863 | -0.705 |
| ARFIP2     | blue | 0.907  | 0.773  |
| ARFRP1     | blue | 0.894  | 0.544  |
| ARHGAP31   | blue | -0.708 | -0.737 |
| ARHGAP33   | blue | 0.565  | 0.813  |
| ARHGAP42   | blue | -0.758 | -0.862 |
| ARHGDIA    | blue | 0.933  | 0.815  |
| ARHGDIG    | blue | 0.888  | 0.866  |
| ARHGEF4    | blue | 0.921  | 0.924  |
| ARHGEF6    | blue | -0.766 | -0.870 |

|             |      |        |        |
|-------------|------|--------|--------|
| ARHGEF7-AS2 | blue | 0.615  | 0.421  |
| ARID2       | blue | -0.798 | -0.901 |
| ARL16       | blue | 0.773  | 0.755  |
| ARL4D       | blue | 0.737  | 0.839  |
| ARMC7       | blue | 0.886  | 0.896  |
| ARPC1A      | blue | 0.711  | 0.869  |
| ARPC2       | blue | 0.745  | 0.869  |
| ARRB2       | blue | 0.914  | 0.959  |
| ARRDC3      | blue | -0.692 | -0.492 |
| ASB14       | blue | -0.697 | -0.550 |
| ASCC3       | blue | -0.885 | -0.897 |
| ASF1A       | blue | -0.877 | -0.793 |
| ASGR1       | blue | 0.716  | 0.821  |
| ASGR2       | blue | 0.708  | 0.483  |
| ASIC2       | blue | 0.837  | 0.841  |
| ASPH        | blue | -0.734 | -0.805 |
| ASPHD1      | blue | 0.607  | 0.865  |
| ASPSCR1     | blue | 0.591  | 0.575  |
| ASS1        | blue | 0.764  | 0.776  |
| ASTL        | blue | 0.680  | 0.756  |
| ATAD2B      | blue | -0.882 | -0.746 |
| ATF1        | blue | -0.653 | -0.641 |
| ATF5        | blue | 0.800  | 0.681  |
| ATG16L2     | blue | 0.764  | 0.641  |
| ATG4D       | blue | 0.863  | 0.682  |
| ATOX1       | blue | 0.479  | 0.559  |
| ATP10D      | blue | -0.792 | -0.866 |
| ATP11C      | blue | -0.945 | -0.840 |
| ATP5G1      | blue | 0.589  | 0.896  |
| ATP5SL      | blue | 0.728  | 0.744  |
| ATP6AP1     | blue | 0.810  | 0.746  |
| ATP6V0A2    | blue | -0.677 | -0.898 |
| ATP6V0B     | blue | 0.956  | 0.960  |
| ATXN7       | blue | -0.690 | -0.824 |
| ATXN7L2     | blue | 0.697  | 0.463  |
| B3GALT6     | blue | 0.506  | 0.890  |
| B3GNTL1     | blue | 0.933  | 0.744  |
| B4GALT2     | blue | 0.804  | 0.847  |
| B4GALT4     | blue | -0.667 | -0.814 |
| B9D2        | blue | 0.906  | 0.723  |
| BABAM1      | blue | 0.937  | 0.875  |
| BAIAP2      | blue | 0.811  | 0.866  |
| BAP1        | blue | 0.920  | 0.936  |
| BCDIN3D     | blue | 0.841  | 0.581  |
| BCKDK       | blue | 0.777  | 0.613  |
| BCL2        | blue | -0.872 | -0.760 |
| BCL2L2      | blue | 0.729  | 0.711  |

|           |      |        |        |
|-----------|------|--------|--------|
| BCL7B     | blue | 0.866  | 0.726  |
| BDH2      | blue | -0.662 | -0.690 |
| BDNF-AS1  | blue | -0.424 | -0.348 |
| BEAN1     | blue | 0.846  | 0.913  |
| BEND5     | blue | 0.909  | 0.823  |
| BEND7     | blue | -0.721 | -0.588 |
| BLVRB     | blue | 0.915  | 0.674  |
| BMPR1A    | blue | -0.548 | -0.854 |
| BOLA1     | blue | 0.820  | 0.707  |
| BORA      | blue | -0.637 | -0.630 |
| BRSK1     | blue | 0.946  | 0.936  |
| BTAF1     | blue | -0.866 | -0.700 |
| BTBD6     | blue | 0.847  | 0.920  |
| C10orf11  | blue | -0.620 | -0.239 |
| C10orf131 | blue | -0.439 | -0.666 |
| C11orf54  | blue | -0.818 | -0.869 |
| C11orf58  | blue | -0.307 | -0.508 |
| C11orf84  | blue | 0.766  | 0.675  |
| C11orf92  | blue | -0.858 | -0.700 |
| C12orf10  | blue | 0.888  | 0.931  |
| C14orf135 | blue | -0.724 | -0.838 |
| C14orf149 | blue | -0.643 | -0.621 |
| C14orf80  | blue | 0.812  | 0.813  |
| C15orf23  | blue | 0.830  | 0.532  |
| C15orf29  | blue | -0.722 | -0.815 |
| C15orf59  | blue | 0.765  | 0.846  |
| C16orf42  | blue | 0.887  | 0.800  |
| C16orf45  | blue | 0.825  | 0.850  |
| C16orf55  | blue | 0.512  | 0.747  |
| C16orf57  | blue | 0.913  | 0.895  |
| C16orf59  | blue | 0.751  | 0.554  |
| C16orf7   | blue | 0.945  | 0.824  |
| C16orf80  | blue | 0.486  | 0.746  |
| C16orf95  | blue | 0.776  | 0.866  |
| C17orf49  | blue | 0.746  | 0.506  |
| C17orf81  | blue | 0.804  | 0.894  |
| C17orf90  | blue | 0.856  | 0.674  |
| C17orf96  | blue | 0.456  | 0.869  |
| C19orf10  | blue | 0.705  | 0.818  |
| C19orf21  | blue | 0.545  | 0.619  |
| C19orf70  | blue | 0.860  | 0.955  |
| C19orf76  | blue | 0.757  | 0.529  |
| C19orf77  | blue | 0.396  | 0.809  |
| C1orf145  | blue | 0.398  | 0.724  |
| C1orf159  | blue | 0.855  | 0.706  |
| C1orf216  | blue | 0.846  | 0.757  |
| C1orf50   | blue | 0.554  | 0.555  |

|          |      |        |        |
|----------|------|--------|--------|
| C1QTNF2  | blue | 0.535  | 0.730  |
| C20orf27 | blue | 0.930  | 0.830  |
| C20orf94 | blue | -0.886 | -0.415 |
| C21orf56 | blue | 0.772  | 0.437  |
| C22orf29 | blue | 0.644  | 0.769  |
| C2orf29  | blue | -0.826 | -0.800 |
| C2orf49  | blue | -0.819 | -0.710 |
| C3orf38  | blue | -0.904 | -0.564 |
| C3orf64  | blue | -0.410 | -0.889 |
| C3orf75  | blue | 0.814  | 0.591  |
| C4orf21  | blue | -0.672 | -0.687 |
| C5       | blue | -0.726 | -0.707 |
| C5orf51  | blue | -0.947 | -0.923 |
| C6orf106 | blue | 0.752  | 0.734  |
| C7       | blue | -0.665 | -0.537 |
| C7orf59  | blue | 0.872  | 0.834  |
| C8G      | blue | 0.874  | 0.685  |
| C8orf42  | blue | -0.339 | -0.616 |
| C8orf55  | blue | 0.713  | 0.820  |
| C9orf16  | blue | 0.592  | 0.715  |
| C9orf169 | blue | 0.379  | 0.548  |
| C9orf64  | blue | -0.837 | -0.659 |
| C9orf69  | blue | 0.922  | 0.943  |
| CA11     | blue | 0.725  | 0.860  |
| CA4      | blue | 0.733  | 0.882  |
| CACNA1F  | blue | 0.769  | 0.829  |
| CACNB3   | blue | 0.875  | 0.950  |
| CACNG7   | blue | 0.741  | 0.949  |
| CALCRL   | blue | -0.733 | -0.578 |
| CALM3    | blue | 0.813  | 0.760  |
| CALY     | blue | 0.831  | 0.722  |
| CAPN7    | blue | -0.918 | -0.852 |
| CAPNS1   | blue | 0.682  | 0.862  |
| CAPZB    | blue | 0.769  | 0.904  |
| CBFB     | blue | -0.821 | -0.846 |
| CBX6     | blue | 0.491  | 0.787  |
| CCDC106  | blue | 0.847  | 0.888  |
| CCDC122  | blue | -0.695 | -0.492 |
| CCDC124  | blue | 0.969  | 0.834  |
| CCDC136  | blue | 0.888  | 0.854  |
| CCDC157  | blue | 0.839  | 0.657  |
| CCDC28B  | blue | 0.686  | 0.457  |
| CCDC33   | blue | 0.577  | 0.555  |
| CCDC48   | blue | 0.824  | 0.835  |
| CCDC56   | blue | 0.973  | 0.891  |
| CCDC64   | blue | 0.906  | 0.784  |
| CCDC82   | blue | -0.790 | -0.351 |

|         |      |        |        |
|---------|------|--------|--------|
| CCK     | blue | 0.451  | 0.801  |
| CCKBR   | blue | 0.793  | 0.880  |
| CCM2    | blue | 0.983  | 0.863  |
| CCNC    | blue | -0.593 | -0.652 |
| CCNG1   | blue | -0.823 | -0.817 |
| CCNJ    | blue | -0.776 | -0.798 |
| CCNK    | blue | -0.769 | -0.861 |
| CCNT1   | blue | -0.922 | -0.688 |
| CCT6B   | blue | -0.636 | -0.601 |
| CCT7    | blue | 0.966  | 0.726  |
| CD109   | blue | -0.894 | -0.833 |
| CD163L1 | blue | 0.630  | 0.427  |
| CD2BP2  | blue | 0.339  | 0.735  |
| CD302   | blue | -0.850 | -0.797 |
| CD320   | blue | 0.764  | 0.790  |
| CD52    | blue | 0.412  | 0.861  |
| CDC34   | blue | 0.898  | 0.845  |
| CDCP2   | blue | 0.524  | 0.370  |
| CDIPT   | blue | 0.975  | 0.930  |
| CDK16   | blue | 0.866  | 0.906  |
| CDK5    | blue | 0.943  | 0.964  |
| CDK5R2  | blue | 0.907  | 0.827  |
| CDKAL1  | blue | -0.923 | -0.800 |
| CELF3   | blue | 0.709  | 0.957  |
| CELF5   | blue | 0.570  | 0.892  |
| CENPBD1 | blue | 0.703  | 0.514  |
| CFL1    | blue | 0.761  | 0.905  |
| CHCHD2  | blue | 0.892  | 0.849  |
| CHCHD3  | blue | 0.650  | 0.701  |
| CHCHD4  | blue | 0.501  | 0.838  |
| CHCHD6  | blue | 0.916  | 0.963  |
| CHD5    | blue | 0.830  | 0.936  |
| CHGA    | blue | 0.643  | 0.705  |
| CHIC2   | blue | -0.512 | -0.586 |
| CHIT1   | blue | 0.594  | 0.516  |
| CHMP1B  | blue | 0.709  | 0.531  |
| CHMP6   | blue | 0.860  | 0.522  |
| CHRM1   | blue | 0.835  | 0.833  |
| CHST1   | blue | 0.654  | 0.886  |
| CHST2   | blue | 0.613  | 0.761  |
| CHSY1   | blue | -0.658 | -0.861 |
| CHUK    | blue | -0.790 | -0.852 |
| CIDECF  | blue | 0.896  | 0.819  |
| CINP    | blue | 0.624  | 0.730  |
| CIRH1A  | blue | 0.619  | 0.232  |
| CISD3   | blue | 0.727  | 0.872  |
| CLEC14A | blue | 0.566  | 0.358  |



|               |      |        |        |
|---------------|------|--------|--------|
| CLEC2L        | blue | 0.704  | 0.833  |
| CLIC3         | blue | 0.623  | 0.360  |
| CLIP3         | blue | 0.586  | 0.825  |
| CLTB          | blue | 0.966  | 0.784  |
| CNOT6         | blue | -0.853 | -0.819 |
| CNOT6L        | blue | -0.886 | -0.955 |
| CNPY3         | blue | 0.628  | 0.711  |
| COBRA1        | blue | 0.897  | 0.784  |
| COG3          | blue | -0.686 | -0.597 |
| COL22A1       | blue | 0.308  | 0.558  |
| COL5A3        | blue | -0.457 | -0.615 |
| COMMD6        | blue | 0.733  | 0.546  |
| COMMD7        | blue | 0.317  | 0.752  |
| COMMD9        | blue | 0.577  | 0.846  |
| COPB1         | blue | -0.581 | -0.616 |
| CORO1A        | blue | 0.889  | 0.945  |
| COX4I1        | blue | 0.874  | 0.805  |
| COX6B1        | blue | 0.813  | 0.704  |
| CPLX1         | blue | 0.573  | 0.603  |
| CPNE5         | blue | 0.780  | 0.890  |
| CPNE6         | blue | 0.753  | 0.867  |
| CPS1          | blue | -0.382 | -0.648 |
| CREBZF        | blue | -0.846 | -0.643 |
| CRHR1         | blue | 0.963  | 0.854  |
| CRIP2         | blue | 0.953  | 0.850  |
| CRYGN         | blue | 0.474  | 0.785  |
| CSGALNACT1    | blue | -0.255 | -0.650 |
| CSNK1A1L      | blue | -0.696 | -0.697 |
| CSNK1G2       | blue | 0.895  | 0.850  |
| CSNK2A2       | blue | 0.960  | 0.433  |
| CTA-250D10.15 | blue | 0.692  | 0.772  |
| CTAGE1        | blue | -0.746 | -0.479 |
| CTD-2562J17.7 | blue | 0.827  | 0.824  |
| CTD-2653M23.2 | blue | -0.596 | -0.464 |
| CTDSPL2       | blue | -0.930 | -0.783 |
| CTNNBIP1      | blue | 0.801  | 0.791  |
| CTNND2        | blue | 0.828  | 0.470  |
| CTSZ          | blue | 0.641  | 0.463  |
| CTU2          | blue | 0.843  | 0.899  |
| CTXN1         | blue | 0.437  | 0.814  |
| CUTA          | blue | 0.934  | 0.903  |
| CUTC          | blue | -0.420 | -0.517 |
| CXXC5         | blue | 0.592  | 0.907  |
| CYC1          | blue | 0.928  | 0.807  |
| CYP3A43       | blue | -0.668 | -0.561 |
| CYTH2         | blue | 0.547  | 0.614  |
| DBNDD1        | blue | 0.774  | 0.843  |

|          |      |        |        |
|----------|------|--------|--------|
| DBNL     | blue | 0.926  | 0.901  |
| DDA1     | blue | 0.703  | 0.679  |
| DDN      | blue | 0.548  | 0.861  |
| DDRKG1   | blue | 0.873  | 0.838  |
| DDX31    | blue | -0.639 | -0.637 |
| DDX41    | blue | 0.940  | 0.954  |
| DDX47    | blue | -0.788 | -0.418 |
| DDX49    | blue | 0.932  | 0.819  |
| DDX5     | blue | -0.956 | -0.868 |
| DDX58    | blue | -0.958 | -0.726 |
| DDX60    | blue | -0.487 | -0.797 |
| DEAF1    | blue | 0.995  | 0.697  |
| DEDD2    | blue | 0.561  | 0.801  |
| DENND4C  | blue | -0.846 | -0.868 |
| DEPDC1   | blue | -0.755 | -0.355 |
| DERA     | blue | -0.847 | -0.691 |
| DGCR6    | blue | 0.802  | 0.694  |
| DGCR6L   | blue | 0.927  | 0.826  |
| DGKZ     | blue | 0.933  | 0.919  |
| DHDH     | blue | 0.721  | 0.816  |
| DIS3     | blue | -0.816 | -0.877 |
| DLK2     | blue | 0.899  | 0.927  |
| DMWD     | blue | 0.834  | 0.866  |
| DNA2     | blue | -0.606 | -0.443 |
| DNAL4    | blue | 0.671  | 0.618  |
| DNASE1L1 | blue | 0.490  | 0.709  |
| DNMT1    | blue | 0.660  | 0.586  |
| DOHH     | blue | 0.719  | 0.906  |
| DOK3     | blue | 0.728  | 0.490  |
| DOK4     | blue | 0.816  | 0.870  |
| DPF1     | blue | 0.757  | 0.905  |
| DPY30    | blue | 0.595  | 0.600  |
| DRAM2    | blue | -0.612 | -0.490 |
| DRAP1    | blue | 0.663  | 0.868  |
| DRD2     | blue | 0.698  | 0.583  |
| DSC2     | blue | -0.761 | -0.732 |
| DTNB     | blue | 0.952  | 0.878  |
| DTX1     | blue | 0.703  | 0.821  |
| DUSP2    | blue | 0.811  | 0.896  |
| DUSP8    | blue | 0.655  | 0.788  |
| DYNLL1   | blue | 0.618  | 0.825  |
| DYRK1B   | blue | 0.853  | 0.897  |
| E2F1     | blue | 0.789  | 0.724  |
| E4F1     | blue | 0.838  | 0.647  |
| EBNA1BP2 | blue | 0.826  | 0.883  |
| EBP      | blue | 0.879  | 0.720  |
| ECEL1P2  | blue | 0.417  | 0.477  |

|          |      |        |        |
|----------|------|--------|--------|
| ECH1     | blue | 0.581  | 0.588  |
| ECHS1    | blue | 0.752  | 0.842  |
| ECSIT    | blue | 0.952  | 0.914  |
| EDEM1    | blue | -0.657 | -0.779 |
| EDF1     | blue | 0.768  | 0.698  |
| EED      | blue | -0.361 | -0.513 |
| EEF1A2   | blue | 0.960  | 0.790  |
| EEF2     | blue | 0.921  | 0.923  |
| EEFSEC   | blue | 0.830  | 0.525  |
| EGFL7    | blue | 0.909  | 0.679  |
| EGLN2    | blue | 0.939  | 0.913  |
| EHHADH   | blue | -0.773 | -0.885 |
| EHMT2    | blue | 0.910  | 0.852  |
| EIF2AK3  | blue | -0.829 | -0.701 |
| EIF2B3   | blue | 0.748  | 0.792  |
| EIF2C4   | blue | -0.789 | -0.692 |
| EIF3H    | blue | 0.546  | 0.691  |
| EIF3I    | blue | 0.917  | 0.875  |
| EIF3K    | blue | 0.815  | 0.796  |
| EIF4EBP2 | blue | -0.875 | -0.895 |
| EIF5AL1  | blue | 0.938  | 0.643  |
| EIF6     | blue | 0.946  | 0.794  |
| ELP4     | blue | -0.754 | -0.477 |
| EMID2    | blue | 0.816  | 0.915  |
| EML4     | blue | -0.833 | -0.885 |
| EML5     | blue | -0.490 | -0.596 |
| EPS8     | blue | -0.749 | -0.810 |
| ERAL1    | blue | 0.859  | 0.908  |
| ERBB2IP  | blue | -0.816 | -0.913 |
| ERCC1    | blue | 0.836  | 0.743  |
| ERCC4    | blue | -0.895 | -0.682 |
| ERGIC1   | blue | 0.543  | 0.780  |
| ERI1     | blue | -0.835 | -0.802 |
| ERI3     | blue | 0.969  | 0.826  |
| ERO1LB   | blue | -0.765 | -0.856 |
| ERP29    | blue | 0.888  | 0.850  |
| ERRFI1   | blue | -0.899 | -0.792 |
| EVL      | blue | 0.952  | 0.726  |
| EXOSC5   | blue | 0.888  | 0.903  |
| F12      | blue | 0.824  | 0.656  |
| F2R      | blue | -0.544 | -0.298 |
| F7       | blue | 0.788  | 0.858  |
| FABP3    | blue | 0.630  | 0.751  |
| FAF2     | blue | -0.636 | -0.712 |
| FAHD1    | blue | 0.770  | 0.837  |
| FAM100A  | blue | 0.908  | 0.859  |
| FAM105B  | blue | -0.873 | -0.673 |

|          |      |        |        |
|----------|------|--------|--------|
| FAM114A2 | blue | -0.915 | -0.776 |
| FAM116A  | blue | -0.919 | -0.876 |
| FAM116B  | blue | 0.937  | 0.816  |
| FAM127B  | blue | 0.761  | 0.781  |
| FAM135A  | blue | -0.805 | -0.813 |
| FAM158A  | blue | 0.971  | 0.839  |
| FAM171B  | blue | -0.821 | -0.776 |
| FAM174B  | blue | 0.803  | 0.870  |
| FAM175A  | blue | -0.842 | -0.691 |
| FAM189A1 | blue | 0.794  | 0.591  |
| FAM189B  | blue | 0.901  | 0.737  |
| FAM18A   | blue | 0.935  | 0.799  |
| FAM198B  | blue | -0.917 | -0.861 |
| FAM207A  | blue | 0.812  | 0.623  |
| FAM208A  | blue | -0.960 | -0.730 |
| FAM212A  | blue | 0.932  | 0.935  |
| FAM219B  | blue | 0.641  | 0.490  |
| FAM32A   | blue | 0.761  | 0.635  |
| FAM35A   | blue | -0.920 | -0.686 |
| FAM46C   | blue | -0.526 | -0.714 |
| FAM48A   | blue | -0.801 | -0.848 |
| FAM57B   | blue | 0.856  | 0.878  |
| FAM58A   | blue | 0.872  | 0.792  |
| FAM60A   | blue | -0.518 | -0.708 |
| FAM64A   | blue | 0.628  | 0.572  |
| FAM71E1  | blue | 0.868  | 0.855  |
| FAM78A   | blue | 0.424  | 0.707  |
| FAM83H   | blue | 0.611  | 0.411  |
| FAM86DP  | blue | 0.818  | 0.058  |
| FAM98C   | blue | 0.822  | 0.822  |
| FANCA    | blue | 0.865  | 0.702  |
| FANCB    | blue | -0.832 | -0.127 |
| FANCC    | blue | -0.388 | -0.510 |
| FANCM    | blue | -0.687 | -0.431 |
| FASTK    | blue | 0.887  | 0.664  |
| FBXL16   | blue | 0.879  | 0.902  |
| FBXL19   | blue | 0.657  | 0.908  |
| FBXL3    | blue | -0.899 | -0.662 |
| FBXO10   | blue | 0.821  | 0.880  |
| FBXO27   | blue | 0.752  | 0.782  |
| FBXO32   | blue | -0.568 | -0.545 |
| FBXO36   | blue | -0.790 | -0.757 |
| FBXO4    | blue | -0.293 | -0.525 |
| FBXO44   | blue | 0.952  | 0.897  |
| FBXW5    | blue | 0.896  | 0.906  |
| FBXW7    | blue | 0.620  | 0.591  |
| FBXW9    | blue | 0.855  | 0.904  |

|               |      |        |        |
|---------------|------|--------|--------|
| FCHO2         | blue | -0.907 | -0.916 |
| FDX1L         | blue | 0.940  | 0.908  |
| FEM1C         | blue | -0.874 | -0.839 |
| FGD1          | blue | 0.822  | 0.677  |
| FGD5-AS1      | blue | -0.722 | -0.547 |
| FGF8          | blue | 0.826  | 0.575  |
| FIGN          | blue | -0.670 | -0.617 |
| FIS1          | blue | 0.555  | 0.733  |
| FKBP14        | blue | -0.714 | -0.774 |
| FKBP1A        | blue | 0.537  | 0.738  |
| FKBP1A-SDCBP2 | blue | -0.410 | -0.636 |
| FKBP2         | blue | 0.584  | 0.635  |
| FKBP7         | blue | -0.551 | -0.799 |
| FLAD1         | blue | 0.875  | 0.814  |
| FLOT2         | blue | 0.873  | 0.820  |
| FLYWCH2       | blue | 0.824  | 0.909  |
| FMNL1         | blue | 0.843  | 0.979  |
| FNDC3B        | blue | -0.819 | -0.729 |
| FNDC5         | blue | 0.763  | 0.876  |
| FNDC8         | blue | 0.518  | 0.746  |
| FOXC2         | blue | -0.672 | -0.560 |
| FOXD4L1       | blue | 0.470  | 0.455  |
| FRS2          | blue | -0.962 | -0.821 |
| FSD1          | blue | 0.925  | 0.944  |
| FZD4          | blue | -0.516 | -0.808 |
| FZD6          | blue | -0.420 | -0.711 |
| G3BP1         | blue | -0.870 | -0.927 |
| GABRA2        | blue | -0.781 | -0.707 |
| GABRD         | blue | 0.908  | 0.850  |
| GABRG1        | blue | -0.791 | -0.689 |
| GALNT9        | blue | 0.928  | 0.917  |
| GALR3         | blue | 0.770  | 0.535  |
| GAP43         | blue | 0.852  | 0.783  |
| GART          | blue | -0.911 | -0.804 |
| GAS2          | blue | -0.843 | -0.688 |
| GAS2L1        | blue | 0.730  | 0.651  |
| GAS2L2        | blue | 0.719  | 0.423  |
| GAS6          | blue | 0.849  | 0.717  |
| GEMIN7        | blue | 0.615  | 0.804  |
| GIPC1         | blue | 0.759  | 0.641  |
| GIT1          | blue | 0.849  | 0.911  |
| GK5           | blue | -0.853 | -0.732 |
| GLTPD1        | blue | 0.759  | 0.784  |
| GMDS          | blue | 0.747  | 0.832  |
| GNB1L         | blue | 0.957  | 0.891  |
| GNPDA1        | blue | 0.812  | 0.594  |
| GNRH2         | blue | 0.903  | 0.701  |

|            |      |        |        |
|------------|------|--------|--------|
| GORAB      | blue | -0.822 | -0.851 |
| GPATCH3    | blue | 0.297  | 0.763  |
| GPC1       | blue | 0.881  | 0.720  |
| GPC4       | blue | -0.564 | -0.758 |
| GPR123     | blue | 0.933  | 0.936  |
| GPR137     | blue | 0.952  | 0.919  |
| GPR162     | blue | 0.816  | 0.894  |
| GPS1       | blue | 0.826  | 0.885  |
| GRAMD4     | blue | 0.604  | 0.612  |
| GRASP      | blue | 0.859  | 0.692  |
| GRK1       | blue | 0.623  | 0.685  |
| GRK6       | blue | 0.845  | 0.909  |
| GRM2       | blue | 0.804  | 0.903  |
| GSG1       | blue | 0.292  | 0.722  |
| GSTZ1      | blue | 0.465  | 0.612  |
| GTF2F1     | blue | 0.980  | 0.694  |
| GUK1       | blue | 0.946  | 0.836  |
| GUSBP5     | blue | 0.511  | 0.840  |
| H2AFY2     | blue | 0.786  | 0.607  |
| HAGH       | blue | 0.926  | 0.903  |
| HAS1       | blue | 0.444  | 0.706  |
| HAUS6      | blue | -0.913 | -0.650 |
| HBQ1       | blue | 0.477  | 0.560  |
| HDAC5      | blue | 0.932  | 0.940  |
| HDDC3      | blue | 0.422  | 0.702  |
| HECTD3     | blue | 0.669  | 0.749  |
| HERC4      | blue | -0.730 | -0.806 |
| HEXIM2     | blue | 0.489  | 0.751  |
| HIF1A      | blue | -0.834 | -0.895 |
| HIST1H2BK  | blue | 0.385  | 0.643  |
| HIST1H3A   | blue | 0.568  | 0.550  |
| HK3        | blue | 0.675  | 0.513  |
| HKR1       | blue | 0.855  | 0.537  |
| HMBS       | blue | 0.454  | 0.634  |
| HMG1       | blue | -0.854 | -0.874 |
| HMHA1      | blue | 0.566  | 0.801  |
| HMOX2      | blue | 0.940  | 0.850  |
| HN1        | blue | 0.649  | 0.854  |
| HNF1A      | blue | 0.827  | 0.782  |
| HNRNP1     | blue | -0.509 | -0.822 |
| HNRNPU     | blue | -0.876 | -0.631 |
| HNRNPU-AS1 | blue | -0.817 | -0.925 |
| HP1BP3     | blue | -0.908 | -0.723 |
| HPCA       | blue | 0.733  | 0.923  |
| HRAS       | blue | 0.917  | 0.757  |
| HRH2       | blue | 0.772  | 0.757  |
| HS6ST1     | blue | 0.761  | 0.689  |

|          |      |        |        |
|----------|------|--------|--------|
| HSD17B12 | blue | -0.894 | -0.637 |
| HSPBP1   | blue | 0.951  | 0.942  |
| HTR5BP   | blue | -0.349 | -0.902 |
| HYAL3    | blue | 0.699  | 0.737  |
| ICAM5    | blue | 0.861  | 0.792  |
| IDE      | blue | -0.826 | -0.795 |
| IER5L    | blue | 0.419  | 0.713  |
| IFT140   | blue | 0.757  | 0.273  |
| IGBP1    | blue | 0.887  | 0.727  |
| IGFBP6   | blue | 0.781  | 0.910  |
| IGLV1-51 | blue | 0.838  | 0.687  |
| IGSF21   | blue | 0.796  | 0.950  |
| IKZF2    | blue | -0.893 | -0.906 |
| IL34     | blue | 0.744  | 0.930  |
| IL6ST    | blue | -0.925 | -0.939 |
| IMPACT   | blue | -0.845 | -0.544 |
| IMPDH1   | blue | 0.936  | 0.915  |
| ING4     | blue | 0.530  | 0.871  |
| INO80D   | blue | -0.649 | -0.720 |
| INPP5E   | blue | 0.911  | 0.469  |
| INTS6    | blue | -0.787 | -0.308 |
| IPMK     | blue | -0.831 | -0.909 |
| IPO8     | blue | -0.677 | -0.666 |
| IRAK1    | blue | 0.310  | 0.595  |
| IRF2BP1  | blue | 0.628  | 0.750  |
| ISG15    | blue | 0.927  | 0.585  |
| ITGB1BP2 | blue | -0.508 | -0.573 |
| ITPA     | blue | 0.143  | 0.785  |
| ITPK1    | blue | 0.730  | 0.941  |
| ITPKA    | blue | 0.736  | 0.962  |
| JAG2     | blue | 0.879  | 0.823  |
| JAK2     | blue | -0.789 | -0.859 |
| JAKMIP1  | blue | 0.930  | 0.800  |
| JMY      | blue | -0.780 | -0.621 |
| JPH3     | blue | 0.906  | 0.885  |
| JRKL     | blue | -0.765 | -0.820 |
| JTB      | blue | 0.880  | 0.698  |
| KAL1     | blue | -0.797 | -0.872 |
| KANSL1L  | blue | -0.938 | -0.951 |
| KAT2A    | blue | 0.896  | 0.636  |
| KAT2B    | blue | -0.892 | -0.890 |
| KATNAL2  | blue | -0.685 | -0.501 |
| KAZALD1  | blue | 0.494  | 0.695  |
| KBTBD12  | blue | -0.485 | -0.859 |
| KCNF1    | blue | 0.801  | 0.886  |
| KCNH3    | blue | 0.969  | 0.934  |
| KCNJ4    | blue | 0.755  | 0.884  |

|                |      |        |        |
|----------------|------|--------|--------|
| KCNK12         | blue | 0.817  | 0.474  |
| KCNK3          | blue | 0.686  | 0.868  |
| KCNMB4         | blue | 0.439  | 0.554  |
| KCNN1          | blue | 0.969  | 0.970  |
| KCTD17         | blue | 0.945  | 0.942  |
| KDELC2         | blue | -0.832 | -0.891 |
| KIAA0907       | blue | -0.775 | -0.691 |
| KIAA1430       | blue | -0.905 | -0.575 |
| KIAA1967       | blue | 0.770  | 0.755  |
| KIAA2013       | blue | 0.405  | 0.636  |
| KIF17          | blue | 0.731  | 0.806  |
| KIFC2          | blue | 0.867  | 0.860  |
| KIFC3          | blue | 0.817  | 0.846  |
| KLF16          | blue | 0.189  | 0.755  |
| KLHDC3         | blue | 0.948  | 0.892  |
| KLHDC8B        | blue | 0.913  | 0.950  |
| KLHL15         | blue | -0.912 | -0.810 |
| KLHL22         | blue | 0.843  | 0.881  |
| KLHL25         | blue | 0.633  | 0.503  |
| KLHL31         | blue | -0.849 | -0.800 |
| KLK7           | blue | 0.253  | 0.753  |
| KLKB1          | blue | -0.513 | -0.397 |
| KPNA5          | blue | -0.710 | -0.737 |
| KPTN           | blue | 0.919  | 0.857  |
| KREMEN2        | blue | 0.866  | 0.638  |
| KRT3           | blue | 0.741  | 0.551  |
| KRT7           | blue | 0.862  | 0.757  |
| LACTB2         | blue | -0.919 | -0.525 |
| LAGE3          | blue | 0.798  | 0.884  |
| LAMTOR1        | blue | 0.866  | 0.738  |
| LARP4          | blue | -0.936 | -0.913 |
| LARS           | blue | -0.693 | -0.691 |
| LATS1          | blue | -0.887 | -0.849 |
| LDOC1          | blue | 0.859  | 0.778  |
| LEO1           | blue | 0.522  | 0.596  |
| LGALS1         | blue | 0.870  | 0.721  |
| LIMD2          | blue | 0.884  | 0.604  |
| LIN7C          | blue | -0.865 | -0.914 |
| LINC00205      | blue | 0.423  | 0.463  |
| LINC00539      | blue | -0.706 | -0.594 |
| LIX1           | blue | -0.628 | -0.649 |
| LLOXNC01-250H1 | blue | 0.654  | 0.612  |
| LMO1           | blue | 0.799  | 0.511  |
| LMO4           | blue | 0.636  | 0.822  |
| LOC678655      | blue | 0.738  | 0.509  |
| LONP2          | blue | -0.619 | -0.772 |
| LONRF1         | blue | -0.733 | -0.683 |



|           |      |        |        |
|-----------|------|--------|--------|
| LPAR4     | blue | -0.722 | -0.470 |
| LPHN1     | blue | 0.820  | 0.950  |
| LPO       | blue | 0.512  | 0.615  |
| LRCH2     | blue | -0.902 | -0.712 |
| LRPAP1    | blue | 0.793  | 0.816  |
| LRRC37A5P | blue | 0.401  | 0.517  |
| LRRC37BP1 | blue | -0.494 | -0.418 |
| LRRC4     | blue | 0.737  | 0.810  |
| LRRC45    | blue | 0.836  | 0.669  |
| LRRC4B    | blue | 0.864  | 0.937  |
| LRRC56    | blue | 0.801  | 0.884  |
| LRRC61    | blue | 0.870  | 0.834  |
| LRRTM1    | blue | 0.594  | 0.835  |
| LRSAM1    | blue | 0.964  | 0.779  |
| LRWD1     | blue | 0.733  | 0.743  |
| LSM4      | blue | 0.501  | 0.656  |
| LSMD1     | blue | 0.915  | 0.894  |
| LTBP4     | blue | 0.924  | 0.885  |
| LYPLA2    | blue | 0.905  | 0.675  |
| LYZL4     | blue | 0.477  | 0.646  |
| MAD1L1    | blue | 0.847  | 0.653  |
| MAFG      | blue | 0.835  | 0.615  |
| MAGI2-AS3 | blue | -0.952 | -0.850 |
| MAGIX     | blue | 0.770  | 0.849  |
| MAML2     | blue | -0.683 | -0.781 |
| MAP1LC3A  | blue | 0.850  | 0.745  |
| MAP2K2    | blue | 0.815  | 0.918  |
| MAP3K10   | blue | 0.904  | 0.922  |
| MAP7D1    | blue | 0.588  | 0.820  |
| MAPK11    | blue | 0.969  | 0.830  |
| MAPK8IP1  | blue | 0.591  | 0.910  |
| MAPK8IP2  | blue | 0.932  | 0.844  |
| MAPRE3    | blue | 0.950  | 0.894  |
| MAPT      | blue | 0.785  | 0.942  |
| MARK4     | blue | 0.698  | 0.605  |
| MASP2     | blue | -0.600 | -0.548 |
| MAZ       | blue | 0.867  | 0.677  |
| MBD3      | blue | 0.868  | 0.652  |
| MBLAC1    | blue | 0.834  | 0.706  |
| MCART6    | blue | -0.698 | -0.673 |
| MCAT      | blue | 0.869  | 0.938  |
| MCCC2     | blue | -0.640 | -0.784 |
| MCOLN1    | blue | 0.733  | 0.840  |
| MCRS1     | blue | 0.810  | 0.853  |
| MEA1      | blue | 0.888  | 0.883  |
| MECR      | blue | 0.956  | 0.899  |
| MED17     | blue | -0.519 | -0.837 |

|          |      |        |        |
|----------|------|--------|--------|
| MED8     | blue | 0.581  | 0.699  |
| MEIS3    | blue | 0.836  | 0.904  |
| MEIS3P1  | blue | 0.661  | 0.868  |
| METTL11A | blue | 0.932  | 0.625  |
| METTL14  | blue | -0.907 | -0.745 |
| METTL17  | blue | -0.537 | -0.533 |
| MEX3A    | blue | -0.677 | -0.500 |
| MFSD10   | blue | 0.811  | 0.629  |
| MFSD12   | blue | 0.858  | 0.543  |
| MFSD3    | blue | 0.884  | 0.777  |
| MFSD8    | blue | -0.891 | -0.664 |
| MGAT4B   | blue | 0.844  | 0.783  |
| MGST3    | blue | 0.606  | 0.634  |
| MIER3    | blue | -0.904 | -0.758 |
| MIR497HG | blue | -0.581 | -0.588 |
| MKLN1    | blue | -0.897 | -0.911 |
| MLF2     | blue | 0.911  | 0.891  |
| MLLT10   | blue | -0.294 | -0.473 |
| MLST8    | blue | 0.914  | 0.815  |
| MMP17    | blue | 0.901  | 0.917  |
| MOB1A    | blue | -0.875 | -0.813 |
| MON1A    | blue | 0.964  | 0.946  |
| MPG      | blue | 0.689  | 0.766  |
| MPND     | blue | 0.925  | 0.939  |
| MRE11A   | blue | -0.731 | -0.759 |
| MRP63    | blue | 0.465  | 0.730  |
| MRPL20   | blue | 0.843  | 0.638  |
| MRPL21   | blue | 0.839  | 0.543  |
| MRPL23   | blue | 0.777  | 0.870  |
| MRPL24   | blue | 0.710  | 0.864  |
| MRPL28   | blue | 0.933  | 0.890  |
| MRPL39   | blue | -0.202 | -0.761 |
| MRPL4    | blue | 0.840  | 0.804  |
| MRPL49   | blue | 0.681  | 0.526  |
| MRPL54   | blue | 0.886  | 0.716  |
| MRPL55   | blue | 0.897  | 0.918  |
| MRPL9    | blue | 0.472  | 0.787  |
| MRPS11   | blue | 0.971  | 0.797  |
| MRPS12   | blue | 0.767  | 0.872  |
| MRPS34   | blue | 0.885  | 0.871  |
| MRTO4    | blue | 0.907  | 0.688  |
| MSANTD1  | blue | 0.714  | 0.599  |
| MSANTD4  | blue | -0.847 | -0.849 |
| MSC      | blue | 0.441  | 0.711  |
| MSRA     | blue | 0.467  | 0.823  |
| MSTO1    | blue | 0.641  | 0.480  |
| MTCH1    | blue | 0.934  | 0.777  |

|           |      |        |        |
|-----------|------|--------|--------|
| MTCP1     | blue | -0.331 | -0.510 |
| MTHFD2L   | blue | -0.763 | -0.722 |
| MTM1      | blue | -0.931 | -0.925 |
| MTMR8     | blue | -0.620 | -0.325 |
| MTR       | blue | -0.701 | -0.569 |
| MUS81     | blue | 0.844  | 0.800  |
| MUSK      | blue | -0.757 | -0.441 |
| MUT       | blue | -0.338 | -0.893 |
| MVD       | blue | 0.880  | 0.711  |
| MXI1      | blue | -0.943 | -0.829 |
| MYBL1     | blue | -0.865 | -0.594 |
| MYCBP     | blue | -0.541 | -0.783 |
| MYL12B    | blue | 0.926  | 0.920  |
| MYL6B     | blue | 0.828  | 0.918  |
| MYOT      | blue | -0.689 | -0.635 |
| MZT2A     | blue | 0.779  | 0.672  |
| NAA60     | blue | 0.636  | 0.884  |
| NANOS3    | blue | 0.239  | 0.698  |
| NAPA      | blue | 0.942  | 0.913  |
| NARFL     | blue | 0.887  | 0.709  |
| NARG2     | blue | -0.959 | -0.863 |
| NAT6      | blue | 0.881  | 0.715  |
| NCBP2-AS1 | blue | -0.843 | -0.757 |
| NCOA3     | blue | -0.911 | -0.715 |
| NCS1      | blue | 0.888  | 0.819  |
| NDUFA7    | blue | 0.781  | 0.793  |
| NDUFB11   | blue | 0.967  | 0.882  |
| NDUFB7    | blue | 0.792  | 0.862  |
| NDUFS8    | blue | 0.968  | 0.742  |
| NEBL      | blue | -0.900 | -0.691 |
| NECAB2    | blue | 0.677  | 0.853  |
| NEDD1     | blue | -0.878 | -0.860 |
| NEDD4     | blue | -0.820 | -0.826 |
| NELF      | blue | 0.827  | 0.796  |
| NEURL     | blue | 0.905  | 0.884  |
| NEUROD2   | blue | 0.649  | 0.528  |
| NFKBIE    | blue | 0.740  | 0.866  |
| NGFRAP1   | blue | 0.950  | 0.849  |
| NHLRC2    | blue | -0.854 | -0.912 |
| NHP2L1    | blue | 0.890  | 0.739  |
| NKD2      | blue | 0.578  | 0.415  |
| NMD3      | blue | -0.854 | -0.752 |
| NOB1      | blue | 0.715  | 0.484  |
| NOC2L     | blue | 0.929  | 0.809  |
| NOC3L     | blue | -0.737 | -0.782 |
| NOG       | blue | 0.708  | 0.709  |
| NOS2      | blue | 0.640  | 0.815  |

|          |      |        |        |
|----------|------|--------|--------|
| NOSIP    | blue | 0.882  | 0.660  |
| NOXO1    | blue | 0.532  | 0.750  |
| NPAS1    | blue | 0.638  | 0.831  |
| NPAT     | blue | -0.915 | -0.883 |
| NPM3     | blue | 0.803  | 0.921  |
| NPPA     | blue | 0.684  | 0.754  |
| NRGN     | blue | 0.842  | 0.892  |
| NRSN2    | blue | 0.875  | 0.968  |
| NT5C3L   | blue | 0.968  | 0.889  |
| NTHL1    | blue | 0.829  | 0.855  |
| NUCB1    | blue | 0.857  | 0.810  |
| NUDT14   | blue | 0.936  | 0.798  |
| NUDT2    | blue | 0.902  | 0.819  |
| NUDT5    | blue | -0.618 | -0.476 |
| NUDT6    | blue | -0.603 | -0.473 |
| NUMBL    | blue | 0.833  | 0.840  |
| NUP107   | blue | -0.844 | -0.707 |
| NUP205   | blue | -0.774 | -0.685 |
| NUP54    | blue | -0.801 | -0.633 |
| NUTF2    | blue | 0.878  | 0.662  |
| NYAP1    | blue | 0.773  | 0.839  |
| OAZ1     | blue | 0.840  | 0.882  |
| OCEL1    | blue | 0.521  | 0.714  |
| ODF3L1   | blue | 0.646  | 0.336  |
| OGFRL1   | blue | -0.927 | -0.796 |
| OLFM1    | blue | 0.758  | 0.883  |
| OMA1     | blue | -0.815 | -0.828 |
| OPN1SW   | blue | 0.507  | 0.767  |
| OR13J1   | blue | 0.968  | 0.687  |
| ORAI2    | blue | 0.508  | 0.649  |
| ORMDL2   | blue | -0.572 | -0.505 |
| OSBP2    | blue | 0.674  | 0.904  |
| OSBPL2   | blue | -0.588 | -0.606 |
| OSBPL7   | blue | 0.636  | 0.571  |
| OSCP1    | blue | 0.514  | 0.634  |
| OSGIN2   | blue | -0.790 | -0.791 |
| OTUB1    | blue | 0.936  | 0.971  |
| P2RX5    | blue | 0.820  | 0.698  |
| P2RY11   | blue | 0.819  | 0.680  |
| PABPC5   | blue | -0.799 | -0.775 |
| PAFAH1B3 | blue | 0.940  | 0.799  |
| PAM16    | blue | 0.909  | 0.702  |
| PANK2    | blue | 0.585  | 0.715  |
| PAPD4    | blue | -0.963 | -0.640 |
| PARD6A   | blue | 0.934  | 0.924  |
| PARP6    | blue | 0.858  | 0.899  |
| PATL1    | blue | -0.724 | -0.785 |

|           |      |        |        |
|-----------|------|--------|--------|
| PBRM1     | blue | -0.886 | -0.789 |
| PCDH9-AS3 | blue | -0.577 | -0.479 |
| PCNT      | blue | 0.309  | 0.382  |
| PCYT2     | blue | 0.810  | 0.843  |
| PDCD1LG2  | blue | -0.733 | -0.587 |
| PDE3A     | blue | -0.590 | -0.810 |
| PDE3B     | blue | -0.772 | -0.882 |
| PDE5A     | blue | -0.772 | -0.780 |
| PDE6C     | blue | -0.729 | -0.810 |
| PDE7A     | blue | -0.513 | -0.484 |
| PDGFC     | blue | -0.688 | -0.790 |
| PDIA2     | blue | 0.436  | 0.595  |
| PDRG1     | blue | 0.680  | 0.584  |
| PDS5A     | blue | -0.906 | -0.497 |
| PDZD11    | blue | 0.918  | 0.863  |
| PDZD4     | blue | 0.819  | 0.907  |
| PDZD7     | blue | 0.887  | 0.832  |
| PEA15     | blue | 0.408  | 0.602  |
| PEX1      | blue | -0.823 | -0.665 |
| PEX16     | blue | 0.784  | 0.727  |
| PFDN1     | blue | 0.811  | 0.870  |
| PFDN5     | blue | 0.951  | 0.545  |
| PFKFB2    | blue | -0.775 | -0.864 |
| PGM2      | blue | -0.684 | -0.633 |
| PGM3      | blue | -0.730 | -0.941 |
| PHB2      | blue | 0.714  | 0.748  |
| PHF10     | blue | -0.822 | -0.804 |
| PHF11     | blue | -0.893 | -0.772 |
| PHKG2     | blue | 0.798  | 0.896  |
| PI4K2A    | blue | 0.868  | 0.755  |
| PI4K2B    | blue | -0.611 | -0.700 |
| PIGQ      | blue | 0.938  | 0.649  |
| PIGW      | blue | -0.838 | -0.549 |
| PIK3C2A   | blue | -0.960 | -0.809 |
| PIK3R2    | blue | 0.746  | 0.979  |
| PIM2      | blue | 0.588  | 0.711  |
| PIN1      | blue | 0.851  | 0.857  |
| PIP5K1C   | blue | 0.774  | 0.893  |
| PIP5KL1   | blue | 0.796  | 0.708  |
| PKMYT1    | blue | 0.618  | 0.502  |
| PKN2      | blue | -0.971 | -0.818 |
| PLAC2     | blue | 0.792  | 0.507  |
| PLAC9     | blue | 0.729  | 0.483  |
| PLB1      | blue | 0.633  | 0.673  |
| PLCH2     | blue | 0.751  | 0.940  |
| PLD6      | blue | 0.731  | 0.650  |
| PLEKHJ1   | blue | 0.905  | 0.747  |

|          |      |        |        |
|----------|------|--------|--------|
| PM EPA1  | blue | 0.670  | 0.563  |
| PMS1     | blue | -0.761 | -0.636 |
| PMS2CL   | blue | 0.845  | 0.408  |
| PNKP     | blue | 0.783  | 0.517  |
| PNMA5    | blue | 0.463  | 0.699  |
| PNMAL2   | blue | 0.947  | 0.932  |
| PNPLA5   | blue | 0.758  | 0.620  |
| POC1B    | blue | -0.898 | -0.827 |
| PODXL2   | blue | 0.875  | 0.805  |
| POLA1    | blue | -0.893 | -0.663 |
| POLDIP2  | blue | 0.916  | 0.766  |
| POLE4    | blue | 0.448  | 0.882  |
| POLI     | blue | -0.859 | -0.748 |
| POLK     | blue | -0.949 | -0.721 |
| POLR2E   | blue | 0.916  | 0.900  |
| POLR2F   | blue | 0.719  | 0.605  |
| POLR2I   | blue | 0.810  | 0.742  |
| POLR3H   | blue | 0.848  | 0.938  |
| POP7     | blue | 0.610  | 0.813  |
| POT1     | blue | -0.854 | -0.638 |
| PP2D1    | blue | -0.589 | -0.635 |
| PPFIA3   | blue | 0.941  | 0.863  |
| PPIA     | blue | 0.792  | 0.879  |
| PPM1J    | blue | 0.911  | 0.679  |
| PPM1N    | blue | 0.670  | 0.464  |
| PPP1CA   | blue | 0.725  | 0.858  |
| PPP1R12C | blue | 0.626  | 0.852  |
| PPP1R1A  | blue | 0.467  | 0.836  |
| PPP1R37  | blue | 0.891  | 0.943  |
| PPP1R3B  | blue | -0.811 | -0.869 |
| PPP1R3F  | blue | 0.952  | 0.864  |
| PPP1R7   | blue | 0.715  | 0.907  |
| PPP1R9B  | blue | 0.727  | 0.870  |
| PPP2R5B  | blue | 0.833  | 0.782  |
| PPP6R1   | blue | 0.922  | 0.962  |
| PPP6R2   | blue | 0.827  | 0.573  |
| PPPDE1   | blue | -0.749 | -0.727 |
| PQLC1    | blue | 0.900  | 0.887  |
| PRCP     | blue | -0.710 | -0.756 |
| PRDX5    | blue | 0.961  | 0.900  |
| PREX2    | blue | -0.724 | -0.768 |
| PRKAA1   | blue | -0.791 | -0.746 |
| PRKCG    | blue | 0.580  | 0.820  |
| PRKCZ    | blue | 0.848  | 0.848  |
| PRKD3    | blue | -0.739 | -0.820 |
| PRKG1    | blue | -0.884 | -0.774 |
| PRMT3    | blue | -0.856 | -0.784 |

|           |      |        |        |
|-----------|------|--------|--------|
| PRPF39    | blue | -0.895 | -0.589 |
| PRPF6     | blue | 0.870  | 0.599  |
| PRRC1     | blue | -0.876 | -0.930 |
| PRRG2     | blue | 0.547  | 0.610  |
| PRRT3     | blue | 0.629  | 0.895  |
| PRSS3     | blue | 0.948  | 0.794  |
| PRSS42    | blue | -0.603 | -0.528 |
| PSD       | blue | 0.894  | 0.902  |
| PSMA7     | blue | 0.919  | 0.925  |
| PSMB3     | blue | 0.962  | 0.764  |
| PSMB4     | blue | 0.910  | 0.597  |
| PSMB6     | blue | 0.934  | 0.910  |
| PSMB7     | blue | 0.948  | 0.613  |
| PSMC3     | blue | 0.948  | 0.856  |
| PSMC5     | blue | 0.946  | 0.631  |
| PSMD7     | blue | 0.622  | 0.599  |
| PSMD8     | blue | 0.689  | 0.858  |
| PSMG3     | blue | 0.954  | 0.953  |
| PTCD3     | blue | -0.794 | -0.886 |
| PTGES2    | blue | 0.920  | 0.975  |
| PTMS      | blue | 0.770  | 0.906  |
| PTOV1     | blue | 0.926  | 0.805  |
| PTPRG     | blue | -0.565 | -0.871 |
| PTRH2     | blue | 0.701  | 0.687  |
| PUSL1     | blue | 0.504  | 0.708  |
| PYCRL     | blue | 0.894  | 0.722  |
| PYGO1     | blue | -0.764 | -0.818 |
| QSER1     | blue | -0.934 | -0.874 |
| R3HCC1    | blue | 0.540  | 0.727  |
| R3HDM2    | blue | 0.355  | 0.599  |
| RAB11FIP3 | blue | 0.874  | 0.754  |
| RAB26     | blue | 0.950  | 0.788  |
| RAB2B     | blue | -0.821 | -0.612 |
| RAB36     | blue | 0.808  | 0.770  |
| RAB3A     | blue | 0.895  | 0.855  |
| RAB4B     | blue | 0.707  | 0.784  |
| RABEPK    | blue | 0.950  | 0.845  |
| RABGGTA   | blue | 0.801  | 0.804  |
| RABL5     | blue | 0.822  | 0.934  |
| RAD51B    | blue | -0.766 | -0.504 |
| RAMP2     | blue | 0.546  | 0.476  |
| RAPGEF4   | blue | 0.470  | 0.325  |
| RAPGEFL1  | blue | 0.694  | 0.919  |
| RARA      | blue | 0.390  | 0.430  |
| RASGEF1A  | blue | 0.910  | 0.834  |
| RASGEF1C  | blue | 0.704  | 0.823  |
| RASL10A   | blue | 0.765  | 0.808  |

|                |      |        |        |
|----------------|------|--------|--------|
| RASL10B        | blue | 0.696  | 0.928  |
| RASSF7         | blue | 0.910  | 0.896  |
| RASSF8         | blue | -0.823 | -0.795 |
| RBAK           | blue | -0.719 | -0.602 |
| RBBP9          | blue | -0.769 | -0.846 |
| RBM33          | blue | -0.413 | -0.502 |
| RBMS3          | blue | -0.603 | -0.693 |
| RBMX           | blue | -0.650 | -0.651 |
| RBP4           | blue | 0.807  | 0.882  |
| RCL1           | blue | -0.433 | -0.850 |
| RCOR1          | blue | -0.397 | -0.741 |
| RDH11          | blue | -0.527 | -0.441 |
| RECK           | blue | -0.368 | -0.592 |
| RECQL4         | blue | 0.910  | 0.801  |
| REEP2          | blue | 0.890  | 0.951  |
| REXO1          | blue | 0.932  | 0.803  |
| REXO4          | blue | 0.619  | 0.525  |
| RFC2           | blue | 0.842  | 0.829  |
| RGS12          | blue | 0.492  | 0.876  |
| RGS14          | blue | 0.480  | 0.883  |
| RHBDD2         | blue | 0.987  | 0.931  |
| RHOBTB2        | blue | 0.779  | 0.936  |
| RHOBTB3        | blue | -0.782 | -0.715 |
| RICTOR         | blue | -0.886 | -0.680 |
| RIMKLB         | blue | -0.620 | -0.789 |
| RNF10          | blue | 0.955  | 0.931  |
| RNF103         | blue | -0.906 | -0.852 |
| RNF112         | blue | 0.966  | 0.847  |
| RNF113A        | blue | 0.703  | 0.691  |
| RNF157         | blue | 0.851  | 0.774  |
| RNF25          | blue | 0.834  | 0.868  |
| RNF32          | blue | -0.897 | -0.683 |
| RNFT2          | blue | 0.864  | 0.836  |
| RNMTL1         | blue | 0.924  | 0.777  |
| ROGDI          | blue | 0.706  | 0.889  |
| RORA           | blue | -0.764 | -0.892 |
| RP11-1134I14.4 | blue | 0.456  | 0.810  |
| RP11-139J15.2  | blue | -0.482 | -0.456 |
| RP11-152N13.12 | blue | -0.735 | -0.728 |
| RP11-168G16.1  | blue | 0.707  | 0.519  |
| RP11-178A10.1  | blue | 0.547  | 0.776  |
| RP11-18C24.6   | blue | 0.766  | 0.550  |
| RP11-273B20.1  | blue | 0.392  | 0.260  |
| RP11-279F6.1   | blue | 0.762  | 0.713  |
| RP11-27I1.4    | blue | -0.744 | -0.603 |
| RP11-298P3.4   | blue | -0.660 | -0.475 |
| RP11-307C12.11 | blue | 0.734  | 0.486  |



|               |      |        |        |
|---------------|------|--------|--------|
| RP11-316M21.6 | blue | -0.484 | -0.528 |
| RP11-33B1.1   | blue | -0.677 | -0.538 |
| RP11-33N16.1  | blue | 0.567  | 0.461  |
| RP11-383C5.4  | blue | -0.751 | -0.483 |
| RP11-465L10.7 | blue | 0.378  | 0.363  |
| RP11-513M16.2 | blue | -0.850 | -0.580 |
| RP11-519G16.1 | blue | -0.569 | -0.742 |
| RP11-522N14.1 | blue | 0.696  | 0.487  |
| RP11-548B3.3  | blue | 0.779  | 0.879  |
| RP11-574F21.2 | blue | -0.332 | -0.572 |
| RP11-598F7.4  | blue | 0.619  | 0.680  |
| RP11-656E20.4 | blue | -0.218 | -0.674 |
| RP11-820L6.1  | blue | -0.643 | -0.517 |
| RP13-1039J1.2 | blue | 0.740  | 0.423  |
| RP1-63G5.5    | blue | 0.722  | 0.636  |
| RP3-355L5.4   | blue | -0.619 | -0.603 |
| RP3-400N23.6  | blue | -0.350 | -0.456 |
| RP4-785G19.5  | blue | -0.458 | -0.769 |
| RP5-842K24.2  | blue | -0.864 | -0.779 |
| RPL19         | blue | 0.717  | 0.611  |
| RPL22L1       | blue | -0.796 | -0.709 |
| RPL23         | blue | 0.461  | 0.581  |
| RPL26         | blue | 0.431  | 0.602  |
| RPL29         | blue | 0.786  | 0.698  |
| RPL3          | blue | 0.881  | 0.775  |
| RPL32         | blue | 0.575  | 0.561  |
| RPL36         | blue | 0.638  | 0.531  |
| RPL41         | blue | 0.468  | 0.691  |
| RPL5          | blue | 0.590  | 0.462  |
| RPL7A         | blue | 0.943  | 0.684  |
| RPS12         | blue | 0.826  | 0.491  |
| RPS19BP1      | blue | 0.738  | 0.832  |
| RPS4X         | blue | 0.740  | 0.564  |
| RPS6KA4       | blue | 0.702  | 0.847  |
| RPS6KA5       | blue | -0.769 | -0.772 |
| RPSAP14       | blue | 0.736  | 0.745  |
| RPUSD1        | blue | 0.927  | 0.802  |
| RRAD          | blue | 0.195  | 0.611  |
| RRN3P1        | blue | -0.754 | -0.681 |
| RRP1          | blue | 0.949  | 0.702  |
| RRP12         | blue | 0.888  | 0.827  |
| RRP36         | blue | 0.674  | 0.803  |
| RSBN1         | blue | -0.746 | -0.636 |
| RSPH9         | blue | 0.468  | 0.619  |
| RTBDN         | blue | 0.872  | 0.888  |
| RTN2          | blue | 0.892  | 0.923  |
| RTN4RL2       | blue | 0.811  | 0.841  |

|          |      |        |        |
|----------|------|--------|--------|
| RUNDC3A  | blue | 0.937  | 0.884  |
| RUNX1    | blue | -0.674 | -0.614 |
| RUVBL1   | blue | 0.913  | 0.550  |
| RUVBL2   | blue | 0.891  | 0.863  |
| SAC3D1   | blue | 0.833  | 0.803  |
| SAMD10   | blue | 0.800  | 0.902  |
| SBK1     | blue | 0.485  | 0.742  |
| SCAND1   | blue | 0.455  | 0.742  |
| SCHIP1   | blue | -0.447 | -0.652 |
| SCML1    | blue | -0.793 | -0.868 |
| SCML4    | blue | 0.688  | 0.489  |
| SCN1B    | blue | 0.591  | 0.369  |
| SCO2     | blue | 0.903  | 0.901  |
| SCTR     | blue | 0.681  | 0.500  |
| SDHAF1   | blue | 0.546  | 0.679  |
| SEMA6B   | blue | 0.818  | 0.887  |
| SENP1    | blue | -0.878 | -0.815 |
| SEPHS1   | blue | 0.662  | 0.538  |
| SEPW1    | blue | 0.557  | 0.927  |
| SERGEF   | blue | 0.843  | 0.757  |
| SERPIN8  | blue | -0.784 | -0.756 |
| SERPIN9  | blue | -0.585 | -0.755 |
| SETD9    | blue | -0.407 | -0.592 |
| SEZ6L2   | blue | 0.784  | 0.885  |
| SF3B5    | blue | 0.886  | 0.590  |
| SGSM2    | blue | 0.915  | 0.857  |
| SH2D3C   | blue | 0.898  | 0.590  |
| SH3BGRL3 | blue | 0.620  | 0.892  |
| SH3BP1   | blue | 0.548  | 0.805  |
| SH3GL1   | blue | 0.726  | 0.586  |
| SIL1     | blue | 0.868  | 0.677  |
| SIX4     | blue | -0.366 | -0.704 |
| SLAIN2   | blue | -0.740 | -0.951 |
| SLC10A7  | blue | -0.894 | -0.881 |
| SLC18B1  | blue | -0.724 | -0.698 |
| SLC19A2  | blue | -0.602 | -0.857 |
| SLC1A6   | blue | 0.961  | 0.907  |
| SLC25A11 | blue | 0.832  | 0.846  |
| SLC25A19 | blue | 0.827  | 0.773  |
| SLC25A22 | blue | 0.961  | 0.826  |
| SLC25A23 | blue | 0.798  | 0.853  |
| SLC25A42 | blue | 0.819  | 0.922  |
| SLC25A45 | blue | 0.755  | 0.752  |
| SLC2A12  | blue | -0.579 | -0.760 |
| SLC2A6   | blue | 0.945  | 0.882  |
| SLC2A8   | blue | 0.751  | 0.506  |
| SLC30A1  | blue | -0.740 | -0.837 |

|          |      |        |        |
|----------|------|--------|--------|
| SLC30A10 | blue | -0.579 | -0.720 |
| SLC30A2  | blue | 0.940  | 0.850  |
| SLC30A7  | blue | -0.976 | -0.901 |
| SLC35B1  | blue | 0.779  | 0.764  |
| SLC35G6  | blue | 0.773  | 0.573  |
| SLC38A2  | blue | -0.848 | -0.568 |
| SLC39A3  | blue | 0.912  | 0.855  |
| SLC45A1  | blue | 0.902  | 0.829  |
| SLC4A3   | blue | 0.902  | 0.912  |
| SLC4A5   | blue | -0.675 | -0.704 |
| SLC9A3R2 | blue | 0.721  | 0.563  |
| SLC9A5   | blue | 0.835  | 0.487  |
| SMAD5    | blue | -0.933 | -0.948 |
| SMAD9    | blue | -0.831 | -0.617 |
| SMARCA4  | blue | 0.939  | 0.747  |
| SMC5     | blue | -0.930 | -0.798 |
| SMCHD1   | blue | -0.900 | -0.870 |
| SMEK1    | blue | -0.854 | -0.784 |
| SMEK2    | blue | -0.873 | -0.700 |
| SMPDL3A  | blue | -0.632 | -0.827 |
| SMURF2   | blue | -0.759 | -0.799 |
| SNAI3    | blue | 0.777  | 0.936  |
| SNAPC2   | blue | 0.739  | 0.848  |
| SNCG     | blue | 0.927  | 0.902  |
| SNHG1    | blue | -0.720 | -0.699 |
| SNRNP25  | blue | 0.914  | 0.853  |
| SNRPD2   | blue | 0.846  | 0.625  |
| SNRPD3   | blue | 0.489  | 0.520  |
| SNUPN    | blue | 0.704  | 0.645  |
| SNX21    | blue | 0.729  | 0.841  |
| SNX6     | blue | -0.811 | -0.404 |
| SOAT1    | blue | -0.697 | -0.854 |
| SOHLH1   | blue | 0.881  | 0.898  |
| SORBS1   | blue | -0.638 | -0.705 |
| SOX5     | blue | -0.683 | -0.742 |
| SOX6     | blue | -0.851 | -0.505 |
| SP140L   | blue | -0.545 | -0.713 |
| SP3      | blue | -0.927 | -0.797 |
| SP4      | blue | -0.812 | -0.718 |
| SPAG7    | blue | 0.762  | 0.866  |
| SPATA2L  | blue | 0.625  | 0.626  |
| SPATA5   | blue | -0.680 | -0.638 |
| SPDEF    | blue | 0.838  | 0.633  |
| SPEF1    | blue | 0.743  | 0.927  |
| SPHK2    | blue | 0.746  | 0.910  |
| SPINK13  | blue | -0.878 | -0.711 |
| SPIRE2   | blue | 0.902  | 0.871  |

|            |      |        |        |
|------------|------|--------|--------|
| SPPL2A     | blue | -0.490 | -0.731 |
| SPTLC3     | blue | -0.824 | -0.782 |
| SPTY2D1    | blue | -0.791 | -0.722 |
| SRC        | blue | 0.800  | 0.758  |
| SRCRB4D    | blue | 0.689  | 0.693  |
| SRM        | blue | 0.874  | 0.685  |
| SRP54      | blue | -0.769 | -0.740 |
| SRSF2      | blue | -0.590 | -0.447 |
| SSBP4      | blue | 0.776  | 0.807  |
| SSFA2      | blue | -0.706 | -0.730 |
| SSNA1      | blue | 0.723  | 0.748  |
| SSR2       | blue | 0.481  | 0.656  |
| SSR4       | blue | 0.797  | 0.725  |
| ST3GAL2    | blue | 0.669  | 0.895  |
| ST6GALNAC6 | blue | 0.818  | 0.855  |
| STAC       | blue | 0.667  | 0.744  |
| STAT5B     | blue | -0.308 | -0.554 |
| STK16      | blue | 0.809  | 0.897  |
| STK25      | blue | 0.976  | 0.945  |
| STK32C     | blue | 0.847  | 0.971  |
| STK38L     | blue | -0.777 | -0.899 |
| STMN3      | blue | 0.932  | 0.877  |
| STOML1     | blue | 0.910  | 0.899  |
| STRN4      | blue | 0.749  | 0.772  |
| STUB1      | blue | 0.917  | 0.759  |
| STX1A      | blue | 0.906  | 0.949  |
| STX8       | blue | 0.759  | 0.842  |
| STYX       | blue | -0.951 | -0.884 |
| SUPT4H1    | blue | 0.802  | 0.928  |
| SURF2      | blue | 0.698  | 0.869  |
| SUV420H1   | blue | -0.880 | -0.786 |
| SUZ12      | blue | -0.866 | -0.712 |
| SWT1       | blue | -0.770 | -0.830 |
| SYDE2      | blue | -0.698 | -0.463 |
| SYN1       | blue | 0.888  | 0.767  |
| SYNDIG1    | blue | 0.461  | 0.804  |
| SYNGR3     | blue | 0.954  | 0.886  |
| SYP        | blue | 0.674  | 0.847  |
| SYP-AS1    | blue | 0.391  | 0.534  |
| SYT12      | blue | 0.697  | 0.878  |
| SYT3       | blue | 0.891  | 0.895  |
| SYT5       | blue | 0.958  | 0.905  |
| TACC3      | blue | 0.504  | 0.600  |
| TADA3      | blue | 0.859  | 0.746  |
| TAF1A      | blue | -0.905 | -0.610 |
| TAGLN3     | blue | 0.878  | 0.894  |
| TANK       | blue | -0.907 | -0.889 |

|          |      |        |        |
|----------|------|--------|--------|
| TBC1D22A | blue | 0.648  | 0.691  |
| TBCB     | blue | 0.718  | 0.719  |
| TCEB2    | blue | 0.802  | 0.751  |
| TCOF1    | blue | 0.714  | 0.737  |
| TCTA     | blue | 0.767  | 0.853  |
| TDRD6    | blue | -0.444 | -0.674 |
| TEAD1    | blue | -0.868 | -0.892 |
| TEKT2    | blue | 0.429  | 0.565  |
| TESC     | blue | 0.937  | 0.916  |
| TESK1    | blue | 0.947  | 0.770  |
| TFPT     | blue | 0.434  | 0.586  |
| TGM3     | blue | 0.514  | 0.590  |
| THAP2    | blue | -0.834 | -0.731 |
| THAP3    | blue | 0.638  | 0.790  |
| THAP6    | blue | -0.956 | -0.588 |
| THAP7    | blue | 0.831  | 0.739  |
| THAP8    | blue | 0.613  | 0.887  |
| THOP1    | blue | 0.808  | 0.809  |
| THSD4    | blue | -0.421 | -0.590 |
| THY1     | blue | 0.924  | 0.923  |
| TIA1     | blue | -0.971 | -0.672 |
| TIFA     | blue | -0.515 | -0.443 |
| TIGD4    | blue | -0.828 | -0.705 |
| TIMM10   | blue | 0.484  | 0.715  |
| TIMM17B  | blue | 0.772  | 0.688  |
| TIMM22   | blue | 0.851  | 0.876  |
| TIMM23   | blue | 0.354  | 0.655  |
| TIMM50   | blue | 0.827  | 0.897  |
| TLE6     | blue | 0.701  | 0.522  |
| TLR2     | blue | -0.485 | -0.769 |
| TMCO1    | blue | -0.864 | -0.689 |
| TMED3    | blue | 0.855  | 0.855  |
| TMEM11   | blue | 0.789  | 0.780  |
| TMEM132E | blue | 0.538  | 0.589  |
| TMEM133  | blue | -0.815 | -0.747 |
| TMEM141  | blue | 0.847  | 0.925  |
| TMEM143  | blue | 0.851  | 0.661  |
| TMEM167B | blue | -0.633 | -0.553 |
| TMEM168  | blue | -0.916 | -0.881 |
| TMEM170A | blue | -0.831 | -0.800 |
| TMEM186  | blue | 0.603  | 0.692  |
| TMEM191A | blue | 0.515  | 0.729  |
| TMEM194A | blue | -0.877 | -0.691 |
| TMEM198  | blue | 0.615  | 0.785  |
| TMEM203  | blue | 0.861  | 0.822  |
| TMEM205  | blue | 0.940  | 0.853  |
| TMEM208  | blue | 0.817  | 0.760  |

|          |      |        |        |
|----------|------|--------|--------|
| TMEM209  | blue | -0.690 | -0.613 |
| TMEM221  | blue | 0.746  | 0.620  |
| TMEM222  | blue | 0.784  | 0.598  |
| TMEM234  | blue | 0.871  | 0.445  |
| TMEM238  | blue | 0.548  | 0.309  |
| TMEM38A  | blue | 0.831  | 0.901  |
| TMEM39B  | blue | 0.819  | 0.615  |
| TMEM52   | blue | 0.799  | 0.271  |
| TMEM56   | blue | -0.714 | -0.546 |
| TMEM59L  | blue | 0.942  | 0.892  |
| TMEM9    | blue | 0.946  | 0.902  |
| TMOD3    | blue | -0.670 | -0.738 |
| TNFRSF18 | blue | 0.854  | 0.622  |
| TNIK     | blue | -0.815 | -0.679 |
| TNK2     | blue | 0.903  | 0.710  |
| TNPO1    | blue | -0.797 | -0.880 |
| TONSL    | blue | 0.922  | 0.816  |
| TOR1A    | blue | 0.612  | 0.720  |
| TOR1AIP2 | blue | -0.607 | -0.842 |
| TP53I11  | blue | 0.540  | 0.688  |
| TPI1     | blue | 0.939  | 0.958  |
| TPRG1L   | blue | 0.811  | 0.715  |
| TPT1     | blue | 0.352  | 0.386  |
| TRAF6    | blue | -0.800 | -0.727 |
| TRAIP    | blue | 0.817  | 0.536  |
| TRAPPC2L | blue | 0.840  | 0.831  |
| TRDMT1   | blue | -0.768 | -0.430 |
| TRIB3    | blue | 0.828  | 0.704  |
| TRIM29   | blue | 0.447  | 0.470  |
| TRIM46   | blue | 0.932  | 0.815  |
| TRIM5    | blue | -0.689 | -0.767 |
| TRMT112  | blue | 0.684  | 0.529  |
| TRMT61A  | blue | 0.633  | 0.704  |
| TRPM3    | blue | -0.620 | -0.800 |
| TRPM7    | blue | -0.858 | -0.670 |
| TRPV2    | blue | 0.721  | 0.463  |
| TRUB2    | blue | 0.836  | 0.957  |
| TSG101   | blue | -0.575 | -0.636 |
| TSPAN6   | blue | -0.850 | -0.773 |
| TSR2     | blue | 0.935  | 0.733  |
| TSSC1    | blue | 0.939  | 0.889  |
| TSTA3    | blue | 0.985  | 0.821  |
| TTC9B    | blue | 0.900  | 0.630  |
| TUBA1A   | blue | 0.498  | 0.679  |
| TUBA4A   | blue | 0.965  | 0.756  |
| TUBB     | blue | 0.883  | 0.702  |
| TUBB2A   | blue | 0.895  | 0.835  |

|         |      |        |        |
|---------|------|--------|--------|
| TUBB4A  | blue | 0.656  | 0.780  |
| TUBB4B  | blue | 0.934  | 0.695  |
| TUBG2   | blue | 0.774  | 0.879  |
| TUSC2   | blue | 0.852  | 0.863  |
| TWF2    | blue | 0.880  | 0.854  |
| U2AF2   | blue | 0.459  | 0.633  |
| UBA52   | blue | 0.613  | 0.715  |
| UBE2H   | blue | -0.829 | -0.759 |
| UBE2L3  | blue | 0.807  | 0.942  |
| UBE2QL1 | blue | 0.681  | 0.688  |
| UBE2S   | blue | 0.603  | 0.610  |
| UBE2V1  | blue | -0.711 | -0.743 |
| UBL7    | blue | 0.913  | 0.868  |
| UBR2    | blue | -0.869 | -0.713 |
| UBR5    | blue | -0.859 | -0.922 |
| UBTF    | blue | 0.531  | 0.838  |
| UBXN6   | blue | 0.929  | 0.931  |
| UEVLD   | blue | -0.835 | -0.844 |
| UFC1    | blue | 0.757  | 0.711  |
| ULK3    | blue | 0.975  | 0.913  |
| UNC119B | blue | -0.788 | -0.803 |
| UNC50   | blue | -0.821 | -0.704 |
| UROC1   | blue | 0.761  | 0.634  |
| USE1    | blue | 0.947  | 0.732  |
| USP24   | blue | -0.860 | -0.809 |
| USP45   | blue | -0.678 | -0.742 |
| USP47   | blue | -0.977 | -0.857 |
| UXT     | blue | 0.847  | 0.535  |
| VAC14   | blue | 0.844  | 0.941  |
| VAMP2   | blue | 0.587  | 0.793  |
| VILL    | blue | 0.813  | 0.691  |
| VPS26B  | blue | 0.841  | 0.767  |
| VPS28   | blue | 0.844  | 0.796  |
| VPS72   | blue | 0.507  | 0.592  |
| VSTM2L  | blue | 0.590  | 0.947  |
| VSX1    | blue | -0.643 | -0.798 |
| VWA5B2  | blue | 0.756  | 0.724  |
| WAPAL   | blue | -0.891 | -0.921 |
| WASF3   | blue | -0.413 | -0.527 |
| WBSCR17 | blue | 0.833  | 0.786  |
| WDR13   | blue | 0.912  | 0.889  |
| WDR25   | blue | 0.772  | 0.776  |
| WDR35   | blue | -0.638 | -0.593 |
| WDR43   | blue | -0.523 | -0.782 |
| WDR46   | blue | 0.892  | 0.798  |
| WDR5    | blue | 0.589  | 0.750  |
| WDR62   | blue | 0.547  | 0.779  |

|         |      |        |        |
|---------|------|--------|--------|
| WDR75   | blue | -0.852 | -0.719 |
| WDR76   | blue | -0.727 | -0.690 |
| WDR83   | blue | 0.919  | 0.787  |
| WDR83OS | blue | 0.649  | 0.422  |
| WDR86   | blue | 0.810  | 0.748  |
| WFDC2   | blue | 0.673  | 0.766  |
| WISP3   | blue | -0.455 | -0.346 |
| WNT10A  | blue | 0.548  | 0.671  |
| WRN     | blue | -0.934 | -0.883 |
| XPOT    | blue | -0.853 | -0.760 |
| XRN1    | blue | -0.921 | -0.889 |
| YARS2   | blue | 0.080  | 0.760  |
| YBX2    | blue | 0.636  | 0.439  |
| YIF1B   | blue | 0.850  | 0.838  |
| ZBTB10  | blue | -0.676 | -0.889 |
| ZBTB12  | blue | 0.476  | 0.635  |
| ZBTB17  | blue | 0.794  | 0.575  |
| ZBTB26  | blue | -0.937 | -0.885 |
| ZC3H12C | blue | -0.912 | -0.915 |
| ZC3H12D | blue | 0.655  | 0.516  |
| ZC3HAV1 | blue | -0.702 | -0.788 |
| ZCCHC4  | blue | -0.836 | -0.677 |
| ZDHHC12 | blue | 0.529  | 0.487  |
| ZDHHC13 | blue | -0.580 | -0.564 |
| ZDHHC2  | blue | -0.910 | -0.846 |
| ZFAND2A | blue | 0.615  | 0.712  |
| ZFAND2B | blue | 0.867  | 0.543  |
| ZFP112  | blue | -0.752 | -0.553 |
| ZMYM1   | blue | -0.928 | -0.733 |
| ZMYND19 | blue | 0.840  | 0.800  |
| ZNF136  | blue | -0.692 | -0.530 |
| ZNF14   | blue | -0.697 | -0.766 |
| ZNF146  | blue | -0.935 | -0.828 |
| ZNF160  | blue | -0.888 | -0.789 |
| ZNF167  | blue | -0.773 | -0.703 |
| ZNF175  | blue | -0.771 | -0.707 |
| ZNF197  | blue | -0.890 | -0.850 |
| ZNF225  | blue | -0.816 | -0.669 |
| ZNF254  | blue | -0.868 | -0.943 |
| ZNF267  | blue | -0.659 | -0.858 |
| ZNF268  | blue | -0.805 | -0.785 |
| ZNF280D | blue | -0.829 | -0.633 |
| ZNF283  | blue | -0.800 | -0.517 |
| ZNF284  | blue | -0.667 | -0.467 |
| ZNF286B | blue | -0.550 | -0.539 |
| ZNF341  | blue | 0.877  | 0.609  |
| ZNF383  | blue | -0.664 | -0.600 |



|            |           |        |        |
|------------|-----------|--------|--------|
| ZNF414     | blue      | 0.767  | 0.613  |
| ZNF432     | blue      | -0.463 | -0.653 |
| ZNF451     | blue      | -0.903 | -0.720 |
| ZNF506     | blue      | -0.767 | -0.819 |
| ZNF528     | blue      | -0.647 | -0.513 |
| ZNF529     | blue      | -0.773 | -0.810 |
| ZNF544     | blue      | 0.828  | 0.757  |
| ZNF550     | blue      | -0.558 | -0.571 |
| ZNF554     | blue      | 0.579  | 0.833  |
| ZNF558     | blue      | -0.923 | -0.820 |
| ZNF571     | blue      | -0.914 | -0.916 |
| ZNF594     | blue      | -0.705 | -0.627 |
| ZNF596     | blue      | -0.420 | -0.678 |
| ZNF654     | blue      | -0.802 | -0.784 |
| ZNF662     | blue      | -0.891 | -0.738 |
| ZNF674     | blue      | -0.571 | -0.827 |
| ZNF74      | blue      | 0.779  | 0.770  |
| ZNF775     | blue      | 0.813  | 0.892  |
| ZNF800     | blue      | -0.555 | -0.772 |
| ZNF827     | blue      | 0.452  | 0.504  |
| ZNRF1      | blue      | 0.806  | 0.859  |
| ZSCAN12    | blue      | -0.898 | -0.806 |
| ZWINT      | blue      | 0.959  | 0.730  |
| AAAS       | darkgreen | -0.758 | -0.759 |
| AARSD1     | darkgreen | -0.903 | -0.870 |
| AC011551.2 | darkgreen | -0.820 | -0.541 |
| AEBP2      | darkgreen | 0.621  | 0.677  |
| AFF4       | darkgreen | 0.966  | 0.966  |
| ALG11      | darkgreen | 0.838  | 0.785  |
| ALKBH7     | darkgreen | -0.581 | -0.879 |
| ANAPC11    | darkgreen | -0.922 | -0.809 |
| ARF4       | darkgreen | 0.690  | 0.681  |
| ARHGEF12   | darkgreen | 0.760  | 0.862  |
| ARL5B      | darkgreen | 0.894  | 0.933  |
| ATF6       | darkgreen | 0.785  | 0.757  |
| ATP13A3    | darkgreen | 0.931  | 0.977  |
| B3GALT1    | darkgreen | 0.845  | 0.845  |
| BAX        | darkgreen | -0.644 | -0.740 |
| BRD9       | darkgreen | -0.908 | -0.875 |
| C12orf49   | darkgreen | 0.841  | 0.889  |
| C7orf42    | darkgreen | 0.722  | 0.976  |
| CA13       | darkgreen | 0.693  | 0.784  |
| CANX       | darkgreen | 0.911  | 0.760  |
| CCDC117    | darkgreen | 0.882  | 0.815  |
| CCDC126    | darkgreen | 0.917  | 0.633  |
| CDK5RAP1   | darkgreen | -0.884 | -0.649 |
| CDV3       | darkgreen | 0.948  | 0.911  |

|          |           |        |        |
|----------|-----------|--------|--------|
| CHAD     | darkgreen | -0.583 | -0.764 |
| CHAF1A   | darkgreen | -0.670 | -0.837 |
| CHMP2A   | darkgreen | -0.984 | -0.919 |
| CLDN12   | darkgreen | 0.680  | 0.831  |
| COPB2    | darkgreen | 0.702  | 0.657  |
| CPEB4    | darkgreen | 0.916  | 0.896  |
| CSNK1A1  | darkgreen | 0.796  | 0.929  |
| CYHR1    | darkgreen | -0.845 | -0.792 |
| CYP2D7P1 | darkgreen | -0.786 | -0.689 |
| DCHS2    | darkgreen | 0.509  | 0.801  |
| DCN      | darkgreen | 0.512  | 0.728  |
| DENND4A  | darkgreen | 0.971  | 0.924  |
| DHX33    | darkgreen | 0.669  | 0.907  |
| DHX40    | darkgreen | 0.896  | 0.907  |
| DNAJB9   | darkgreen | 0.810  | 0.867  |
| EDEM3    | darkgreen | 0.979  | 0.935  |
| EDNRA    | darkgreen | 0.452  | 0.794  |
| ELL2     | darkgreen | 0.822  | 0.901  |
| ERLIN1   | darkgreen | 0.557  | 0.829  |
| ETF1     | darkgreen | 0.857  | 0.900  |
| ETS1     | darkgreen | 0.728  | 0.689  |
| FAM208B  | darkgreen | 0.943  | 0.778  |
| FAM82A2  | darkgreen | -0.813 | -0.688 |
| FANCG    | darkgreen | -0.959 | -0.800 |
| FBXO21   | darkgreen | 0.662  | 0.781  |
| FBXO5    | darkgreen | 0.914  | 0.882  |
| FOXJ3    | darkgreen | 0.811  | 0.947  |
| FRMD3    | darkgreen | 0.637  | 0.677  |
| GNB4     | darkgreen | 0.841  | 0.855  |
| GNPTG    | darkgreen | -0.920 | -0.714 |
| GSPT1    | darkgreen | 0.937  | 0.915  |
| GSR      | darkgreen | 0.500  | 0.869  |
| HDX      | darkgreen | 0.953  | 0.588  |
| HELZ     | darkgreen | 0.899  | 0.775  |
| HIPK1    | darkgreen | 0.756  | 0.964  |
| HIPK3    | darkgreen | 0.823  | 0.900  |
| HIST3H2A | darkgreen | -0.666 | -0.660 |
| HS2ST1   | darkgreen | 0.842  | 0.852  |
| IFI27L1  | darkgreen | -0.827 | -0.614 |
| IFNAR1   | darkgreen | 0.954  | 0.804  |
| IL1RAP   | darkgreen | 0.747  | 0.817  |
| IMP3     | darkgreen | -0.620 | -0.754 |
| INO80C   | darkgreen | -0.863 | -0.845 |
| IREB2    | darkgreen | 0.947  | 0.910  |
| JHDM1D   | darkgreen | 0.928  | 0.904  |
| KCTD12   | darkgreen | 0.950  | 0.814  |
| KCTD20   | darkgreen | 0.946  | 0.931  |

|          |           |        |        |
|----------|-----------|--------|--------|
| KIAA0586 | darkgreen | 0.860  | 0.809  |
| KIAA2018 | darkgreen | 0.870  | 0.816  |
| KLC4     | darkgreen | -0.878 | -0.815 |
| LIN7B    | darkgreen | -0.937 | -0.828 |
| LPHN3    | darkgreen | 0.768  | 0.834  |
| LPIN2    | darkgreen | 0.932  | 0.865  |
| LRRC43   | darkgreen | -0.853 | -0.584 |
| LYST     | darkgreen | 0.850  | 0.772  |
| MAK16    | darkgreen | 0.808  | 0.684  |
| MAPK12   | darkgreen | -0.786 | -0.776 |
| MED13L   | darkgreen | 0.485  | 0.868  |
| MMGT1    | darkgreen | 0.939  | 0.824  |
| MRPL2    | darkgreen | -0.844 | -0.822 |
| MRPL38   | darkgreen | -0.906 | -0.743 |
| MRPL43   | darkgreen | -0.761 | -0.926 |
| MYNN     | darkgreen | 0.868  | 0.814  |
| MYO18B   | darkgreen | -0.573 | -0.779 |
| NAA50    | darkgreen | 0.986  | 0.916  |
| NAAA     | darkgreen | -0.425 | -0.489 |
| NAMPT    | darkgreen | 0.934  | 0.785  |
| NFAT5    | darkgreen | 0.854  | 0.782  |
| NPRL2    | darkgreen | -0.902 | -0.785 |
| NUDT16L1 | darkgreen | -0.915 | -0.757 |
| NUFIP2   | darkgreen | 0.971  | 0.942  |
| OBFC2A   | darkgreen | 0.477  | 0.663  |
| OTUD4    | darkgreen | 0.935  | 0.926  |
| PAQR7    | darkgreen | -0.942 | -0.665 |
| PBX3     | darkgreen | 0.711  | 0.776  |
| PCDH18   | darkgreen | 0.747  | 0.718  |
| PCDHB12  | darkgreen | 0.434  | 0.794  |
| PCDHB13  | darkgreen | 0.719  | 0.796  |
| PCDHB14  | darkgreen | 0.601  | 0.713  |
| PCGF5    | darkgreen | 0.876  | 0.907  |
| PDE4D    | darkgreen | 0.728  | 0.749  |
| PHOSPHO2 | darkgreen | 0.593  | 0.876  |
| PI4KAP2  | darkgreen | -0.648 | -0.714 |
| PIPSL    | darkgreen | -0.845 | -0.850 |
| PPDPF    | darkgreen | -0.474 | -0.627 |
| PRKCA    | darkgreen | 0.841  | 0.890  |
| PTPRJ    | darkgreen | 0.795  | 0.825  |
| RAB5A    | darkgreen | 0.951  | 0.743  |
| RALGAPA1 | darkgreen | 0.969  | 0.933  |
| RANBP1   | darkgreen | -0.763 | -0.720 |
| RB1      | darkgreen | 0.978  | 0.826  |
| RBM12    | darkgreen | 0.869  | 0.928  |
| RGL1     | darkgreen | 0.794  | 0.923  |
| RNF115   | darkgreen | 0.687  | 0.783  |

|          |           |        |        |
|----------|-----------|--------|--------|
| RNF169   | darkgreen | 0.780  | 0.860  |
| RPP25L   | darkgreen | -0.894 | -0.674 |
| RPUSD2   | darkgreen | -0.889 | -0.524 |
| RSG1     | darkgreen | -0.791 | -0.885 |
| SAMD8    | darkgreen | 0.946  | 0.907  |
| SDSL     | darkgreen | -0.850 | -0.594 |
| SEC24A   | darkgreen | 0.885  | 0.920  |
| SESTD1   | darkgreen | 0.854  | 0.757  |
| SFTPD    | darkgreen | -0.557 | -0.897 |
| SLC35E4  | darkgreen | -0.922 | -0.675 |
| SLC37A3  | darkgreen | 0.704  | 0.721  |
| SMG1     | darkgreen | 0.895  | 0.846  |
| SOD2     | darkgreen | 0.625  | 0.733  |
| STAT1    | darkgreen | 0.602  | 0.927  |
| STRA13   | darkgreen | -0.736 | -0.772 |
| SUGP1    | darkgreen | -0.929 | -0.829 |
| TAF6L    | darkgreen | -0.720 | -0.707 |
| TARS2    | darkgreen | -0.901 | -0.668 |
| TCTN3    | darkgreen | 0.607  | 0.817  |
| TEX264   | darkgreen | -0.927 | -0.834 |
| TFAP4    | darkgreen | -0.598 | -0.527 |
| TMEM135  | darkgreen | 0.940  | 0.823  |
| TMEM161A | darkgreen | -0.831 | -0.822 |
| TMTC3    | darkgreen | 0.777  | 0.836  |
| TOP1MT   | darkgreen | -0.913 | -0.731 |
| TRAPPC12 | darkgreen | -0.863 | -0.750 |
| TRIM8    | darkgreen | -0.477 | -0.709 |
| TRMT2A   | darkgreen | -0.918 | -0.727 |
| TRPC4    | darkgreen | 0.681  | 0.800  |
| TTC39B   | darkgreen | 0.838  | 0.797  |
| TUFM     | darkgreen | -0.872 | -0.937 |
| TXNRD1   | darkgreen | 0.550  | 0.895  |
| UBASH3B  | darkgreen | 0.928  | 0.864  |
| UBE2J1   | darkgreen | 0.810  | 0.906  |
| UROD     | darkgreen | -0.815 | -0.880 |
| WBP1     | darkgreen | -0.852 | -0.658 |
| WDFY3    | darkgreen | 0.908  | 0.874  |
| WNK3     | darkgreen | 0.967  | 0.864  |
| WWC2     | darkgreen | 0.826  | 0.805  |
| XPO1     | darkgreen | 0.868  | 0.729  |
| XYLT2    | darkgreen | -0.717 | -0.710 |
| ZBTB33   | darkgreen | 0.959  | 0.942  |
| ZC3HC1   | darkgreen | -0.679 | -0.824 |
| ZNF205   | darkgreen | -0.793 | -0.571 |
| ZNF295   | darkgreen | 0.859  | 0.849  |
| ZNF428   | darkgreen | -0.447 | -0.740 |
| ZNF518B  | darkgreen | 0.929  | 0.895  |

|               |           |        |        |
|---------------|-----------|--------|--------|
| ZNRF2         | darkgreen | 0.956  | 0.762  |
| AC005162.3    | darkgrey  | 0.518  | 0.665  |
| AC007386.2    | darkgrey  | 0.646  | 0.753  |
| AC007743.1    | darkgrey  | -0.713 | -0.739 |
| AC055764.1    | darkgrey  | 0.831  | 0.807  |
| ACOT1         | darkgrey  | 0.767  | 0.509  |
| AKR7L         | darkgrey  | 0.843  | 0.823  |
| AL139099.1    | darkgrey  | 0.835  | 0.954  |
| ALDH8A1       | darkgrey  | 0.542  | 0.418  |
| ANKRD30BL     | darkgrey  | 0.538  | 0.714  |
| ARHGAP32      | darkgrey  | -0.747 | -0.756 |
| ASTN1         | darkgrey  | -0.898 | -0.946 |
| ATP2B4        | darkgrey  | -0.925 | -0.880 |
| ATP6AP1L      | darkgrey  | 0.672  | 0.624  |
| BCL11B        | darkgrey  | 0.521  | 0.542  |
| BCL9L         | darkgrey  | -0.779 | -0.827 |
| BPTF          | darkgrey  | 0.490  | 0.802  |
| BRPF3         | darkgrey  | -0.901 | -0.963 |
| C10orf103     | darkgrey  | 0.890  | 0.885  |
| C12orf50      | darkgrey  | 0.541  | 0.786  |
| C17orf57      | darkgrey  | 0.484  | 0.898  |
| C1orf146      | darkgrey  | 0.406  | 0.661  |
| C3orf30       | darkgrey  | 0.547  | 0.770  |
| C3orf35       | darkgrey  | 0.824  | 0.917  |
| CALD1         | darkgrey  | 0.798  | 0.797  |
| CANT1         | darkgrey  | -0.919 | -0.923 |
| CCDC36        | darkgrey  | 0.768  | 0.830  |
| CLDND2        | darkgrey  | 0.718  | 0.818  |
| CLINT1        | darkgrey  | -0.773 | -0.739 |
| CNOT10        | darkgrey  | 0.710  | 0.637  |
| CPO           | darkgrey  | 0.720  | 0.732  |
| CTB-113P19.1  | darkgrey  | 0.711  | 0.515  |
| CTB-46B19.2   | darkgrey  | 0.713  | 0.876  |
| CTC-338M12.4  | darkgrey  | 0.598  | 0.853  |
| CTD-3065B20.3 | darkgrey  | 0.784  | 0.865  |
| DBIL5P2       | darkgrey  | 0.665  | 0.868  |
| DCP1A         | darkgrey  | 0.788  | 0.828  |
| DPYSL3        | darkgrey  | -0.726 | -0.620 |
| DSCAM-IT1     | darkgrey  | 0.772  | 0.547  |
| EFR3B         | darkgrey  | -0.865 | -0.976 |
| EIF4EBP1      | darkgrey  | 0.825  | 0.783  |
| EIF5A         | darkgrey  | 0.311  | 0.571  |
| EXTL3         | darkgrey  | -0.931 | -0.941 |
| EZH2          | darkgrey  | 0.705  | 0.909  |
| FAM120B       | darkgrey  | -0.610 | -0.713 |
| FAM194A       | darkgrey  | 0.840  | 0.783  |
| FAM55A        | darkgrey  | 0.660  | 0.704  |

|              |          |        |        |
|--------------|----------|--------|--------|
| FAM5C        | darkgrey | -0.651 | -0.676 |
| FAM66B       | darkgrey | -0.870 | -0.600 |
| FILIP1L      | darkgrey | 0.818  | 0.806  |
| GBP7         | darkgrey | 0.824  | 0.667  |
| GCNT3        | darkgrey | 0.811  | 0.821  |
| GPR64        | darkgrey | 0.899  | 0.812  |
| GUCY2D       | darkgrey | 0.818  | 0.143  |
| HBA1         | darkgrey | 0.849  | 0.471  |
| HIGD1C       | darkgrey | 0.753  | 0.813  |
| HULC         | darkgrey | 0.738  | 0.866  |
| IL20RB       | darkgrey | 0.391  | 0.855  |
| INTS4L1      | darkgrey | 0.600  | 0.563  |
| ISY1         | darkgrey | 0.789  | 0.873  |
| KIAA1407     | darkgrey | 0.677  | 0.938  |
| L1TD1        | darkgrey | 0.748  | 0.922  |
| LINC00525    | darkgrey | 0.858  | 0.918  |
| MAGI2        | darkgrey | -0.831 | -0.786 |
| MALSU1       | darkgrey | 0.548  | 0.677  |
| MDGA1        | darkgrey | -0.656 | -0.573 |
| MIR320B2     | darkgrey | 0.712  | 0.527  |
| MIR548I1     | darkgrey | 0.729  | 0.832  |
| MORC2-AS1    | darkgrey | 0.668  | 0.661  |
| NAP1L6       | darkgrey | 0.592  | 0.532  |
| NEK11        | darkgrey | 0.779  | 0.679  |
| NEXN         | darkgrey | 0.855  | 0.881  |
| NHSL2        | darkgrey | -0.866 | -0.922 |
| NKAPP1       | darkgrey | 0.696  | 0.513  |
| NRP2         | darkgrey | -0.802 | -0.756 |
| NUDT13       | darkgrey | 0.885  | 0.934  |
| NUP37        | darkgrey | 0.747  | 0.603  |
| OSBPL10-AS1  | darkgrey | 0.593  | 0.833  |
| PCBP2        | darkgrey | 0.869  | 0.808  |
| PCCA-AS1     | darkgrey | 0.540  | 0.583  |
| PCDH1        | darkgrey | -0.856 | -0.964 |
| PCDHA2       | darkgrey | -0.706 | -0.817 |
| PCDHA4       | darkgrey | -0.829 | -0.911 |
| PDZK1IP1-AS1 | darkgrey | 0.821  | 0.878  |
| PFN4         | darkgrey | 0.675  | 0.793  |
| PHF15        | darkgrey | -0.968 | -0.880 |
| PIH1D2       | darkgrey | 0.689  | 0.559  |
| POM121       | darkgrey | -0.908 | -0.906 |
| PPEF2        | darkgrey | 0.663  | 0.668  |
| PPP1R16B     | darkgrey | -0.916 | -0.844 |
| PRRC2B       | darkgrey | -0.950 | -0.939 |
| PSMC1        | darkgrey | 0.778  | 0.844  |
| PTGFRN       | darkgrey | -0.835 | -0.736 |
| RAI1         | darkgrey | -0.582 | -0.847 |

|                |          |        |        |
|----------------|----------|--------|--------|
| RELN           | darkgrey | -0.180 | -0.645 |
| RGS8           | darkgrey | -0.638 | -0.971 |
| RNF113B        | darkgrey | 0.797  | 0.717  |
| RNF2           | darkgrey | -0.949 | -0.791 |
| RNF216-IT1     | darkgrey | 0.897  | 0.767  |
| RP11-1136G11.7 | darkgrey | -0.355 | -0.643 |
| RP11-139H15.1  | darkgrey | 0.834  | 0.622  |
| RP11-182J1.12  | darkgrey | 0.787  | 0.640  |
| RP11-231I16.1  | darkgrey | 0.480  | 0.812  |
| RP11-346I3.4   | darkgrey | 0.716  | 0.922  |
| RP11-464F9.9   | darkgrey | 0.675  | 0.892  |
| RP11-484D2.2   | darkgrey | 0.833  | 0.912  |
| RP11-507K2.2   | darkgrey | 0.871  | 0.802  |
| RP11-586K2.1   | darkgrey | -0.879 | -0.749 |
| RP11-637O19.2  | darkgrey | 0.735  | 0.838  |
| RP11-752G15.4  | darkgrey | 0.762  | 0.406  |
| RP11-80H8.4    | darkgrey | 0.493  | 0.638  |
| RP11-840I19.3  | darkgrey | 0.868  | 0.872  |
| RP11-877E17.2  | darkgrey | 0.892  | 0.766  |
| RP11-96K19.2   | darkgrey | 0.665  | 0.749  |
| RP3-477O4.14   | darkgrey | 0.950  | 0.646  |
| RP4-811H24.6   | darkgrey | 0.868  | 0.875  |
| RP5-828H9.3    | darkgrey | 0.848  | 0.546  |
| RPL13AP6       | darkgrey | 0.753  | 0.816  |
| SAA2           | darkgrey | 0.524  | 0.782  |
| SAT1           | darkgrey | 0.734  | 0.777  |
| SAT2           | darkgrey | 0.776  | 0.619  |
| SCN4A          | darkgrey | -0.668 | -0.488 |
| SEC31A         | darkgrey | -0.499 | -0.623 |
| SECISBP2       | darkgrey | 0.480  | 0.625  |
| SERPINE1       | darkgrey | 0.609  | 0.603  |
| SH3RF1         | darkgrey | -0.801 | -0.868 |
| SLC10A1        | darkgrey | 0.933  | 0.851  |
| SLC26A3        | darkgrey | 0.707  | 0.730  |
| SLC35C1        | darkgrey | -0.508 | -0.737 |
| SNX31          | darkgrey | 0.878  | 0.632  |
| SPARCL1        | darkgrey | 0.824  | 0.771  |
| SRGAP3-AS1     | darkgrey | 0.731  | 0.661  |
| SUPV3L1        | darkgrey | 0.535  | 0.525  |
| TBC1D14        | darkgrey | -0.931 | -0.914 |
| TLL1           | darkgrey | -0.648 | -0.535 |
| TNFRSF19       | darkgrey | -0.915 | -0.871 |
| TPH1           | darkgrey | 0.584  | 0.695  |
| TPRXL          | darkgrey | 0.812  | 0.497  |
| TRAPPC9        | darkgrey | -0.785 | -0.802 |
| TRIM27         | darkgrey | -0.800 | -0.608 |
| TRNAU1AP       | darkgrey | 0.725  | 0.949  |

|               |               |        |        |
|---------------|---------------|--------|--------|
| TTN           | darkgrey      | 0.547  | 0.775  |
| UBE3B         | darkgrey      | -0.846 | -0.845 |
| UPF3A         | darkgrey      | 0.901  | 0.804  |
| VLDLR         | darkgrey      | -0.881 | -0.962 |
| WDR64         | darkgrey      | 0.866  | 0.498  |
| XPO7          | darkgrey      | -0.935 | -0.887 |
| XYLT1         | darkgrey      | -0.896 | -0.955 |
| ZBTB80S       | darkgrey      | 0.941  | 0.966  |
| ZCCHC2        | darkgrey      | -0.743 | -0.859 |
| ZDHC5         | darkgrey      | -0.766 | -0.681 |
| ZFP2          | darkgrey      | 0.926  | 0.804  |
| ZNF444        | darkgrey      | 0.819  | 0.692  |
| ZNF502        | darkgrey      | 0.574  | 0.676  |
| ZNF787        | darkgrey      | 0.539  | 0.677  |
| SEPT11        | darkolivegree | 0.840  | 0.912  |
| AC090616.2    | darkolivegree | 0.727  | 0.689  |
| AL592528.1    | darkolivegree | 0.745  | 0.498  |
| ATP6V0A4      | darkolivegree | 0.831  | 0.626  |
| C1QL1         | darkolivegree | 0.734  | 0.647  |
| CCDC47        | darkolivegree | -0.769 | -0.549 |
| CNOT8         | darkolivegree | -0.728 | -0.836 |
| CTC-378H22.1  | darkolivegree | 0.920  | 0.541  |
| CTCF          | darkolivegree | 0.736  | 0.645  |
| CTD-2574D22.5 | darkolivegree | 0.885  | 0.687  |
| DNAJC8        | darkolivegree | 0.837  | 0.830  |
| EMD           | darkolivegree | 0.858  | 0.552  |
| FAM127C       | darkolivegree | -0.862 | -0.520 |
| FAM182B       | darkolivegree | 0.615  | 0.283  |
| FGF16         | darkolivegree | 0.790  | 0.696  |
| GABARAP       | darkolivegree | 0.867  | 0.774  |
| HMGB3P22      | darkolivegree | 0.867  | 0.882  |
| HOPX          | darkolivegree | 0.660  | 0.766  |
| IK            | darkolivegree | 0.917  | 0.645  |
| KAT6B         | darkolivegree | 0.777  | 0.958  |
| KIAA1984      | darkolivegree | 0.581  | 0.666  |
| LINC00266-1   | darkolivegree | 0.627  | 0.735  |
| LINC00577     | darkolivegree | 0.937  | 0.593  |
| LPAL2         | darkolivegree | 0.660  | 0.697  |
| NBEAL1        | darkolivegree | 0.773  | 0.913  |
| NSFL1C        | darkolivegree | 0.919  | 0.886  |
| NXNL2         | darkolivegree | 0.565  | 0.850  |
| OLFML2A       | darkolivegree | -0.757 | -0.520 |
| OTUD1         | darkolivegree | -0.693 | -0.680 |
| PCBD1         | darkolivegree | 0.874  | 0.671  |
| PRRC2C        | darkolivegree | 0.840  | 0.906  |
| PRSS54        | darkolivegree | 0.939  | 0.721  |
| RAD23A        | darkolivegree | 0.829  | 0.763  |



|                |               |        |        |
|----------------|---------------|--------|--------|
| RBM15          | darkolivegree | -0.857 | -0.853 |
| RNF19A         | darkolivegree | -0.858 | -0.682 |
| RP11-181G12.4  | darkolivegree | 0.697  | 0.905  |
| RP11-327L3.1   | darkolivegree | -0.616 | -0.792 |
| RP11-360F5.1   | darkolivegree | -0.871 | -0.695 |
| RP11-397P14.3  | darkolivegree | 0.928  | 0.881  |
| RP11-48B14.2   | darkolivegree | 0.835  | 0.898  |
| RPL14          | darkolivegree | 0.806  | 0.744  |
| RPL28          | darkolivegree | 0.888  | 0.895  |
| RPL35          | darkolivegree | 0.774  | 0.573  |
| RPS24          | darkolivegree | 0.944  | 0.714  |
| SAMD1          | darkolivegree | 0.898  | 0.904  |
| SNORA84        | darkolivegree | 0.692  | 0.891  |
| SNORA9         | darkolivegree | -0.822 | -0.550 |
| SNRPA          | darkolivegree | 0.827  | 0.810  |
| SP7            | darkolivegree | -0.728 | -0.643 |
| SPDYE8P        | darkolivegree | 0.825  | 0.806  |
| SRP14          | darkolivegree | 0.940  | 0.763  |
| TAF10          | darkolivegree | 0.957  | 0.880  |
| TAOK3          | darkolivegree | 0.885  | 0.937  |
| TCEAL3         | darkolivegree | 0.945  | 0.873  |
| TCEAL4         | darkolivegree | 0.926  | 0.924  |
| TCEAL5         | darkolivegree | 0.934  | 0.966  |
| TCEAL6         | darkolivegree | 0.881  | 0.792  |
| TMEM132C       | darkolivegree | -0.877 | -0.677 |
| UBAP2          | darkolivegree | 0.930  | 0.907  |
| UTP3           | darkolivegree | 0.959  | 0.799  |
| ZAR1           | darkolivegree | -0.750 | -0.813 |
| ZNF419         | darkolivegree | -0.827 | -0.632 |
| ZNF420         | darkolivegree | -0.780 | -0.739 |
| ZNF519         | darkolivegree | -0.739 | -0.773 |
| ZNF764         | darkolivegree | -0.640 | -0.649 |
| ZSCAN20        | darkolivegree | -0.770 | -0.850 |
| AC004540.4     | darkorange    | -0.485 | -0.584 |
| AC010680.1     | darkorange    | -0.774 | -0.636 |
| ADCY6          | darkorange    | 0.812  | 0.695  |
| ADCY7          | darkorange    | 0.811  | 0.719  |
| ANAPC16        | darkorange    | -0.979 | -0.932 |
| ANGPTL5        | darkorange    | -0.401 | -0.620 |
| ANKHD1-EIF4EBP | darkorange    | -0.770 | -0.701 |
| ANKRD52        | darkorange    | 0.896  | 0.898  |
| AP1B1          | darkorange    | 0.921  | 0.784  |
| ARRB1          | darkorange    | 0.944  | 0.967  |
| AXDND1         | darkorange    | -0.497 | -0.660 |
| BICD2          | darkorange    | 0.957  | 0.962  |
| BSCL2          | darkorange    | -0.627 | -0.627 |
| C11orf21       | darkorange    | 0.727  | 0.632  |

|              |            |        |        |
|--------------|------------|--------|--------|
| C16orf70     | darkorange | 0.901  | 0.894  |
| C20orf152    | darkorange | -0.285 | -0.816 |
| CC2D2A       | darkorange | -0.802 | -0.614 |
| CCRL1        | darkorange | -0.948 | -0.759 |
| CELSR2       | darkorange | 0.970  | 0.975  |
| CETN2        | darkorange | -0.826 | -0.327 |
| CHD2         | darkorange | -0.974 | -0.929 |
| CHEK2        | darkorange | -0.801 | -0.583 |
| CHMP4A       | darkorange | -0.910 | -0.858 |
| CLPB         | darkorange | 0.937  | 0.932  |
| COIL         | darkorange | -0.937 | -0.783 |
| CSNK1D       | darkorange | 0.872  | 0.814  |
| CTA-221G9.11 | darkorange | 0.554  | 0.763  |
| DDB1         | darkorange | 0.960  | 0.882  |
| DUT          | darkorange | -0.628 | -0.363 |
| DYNC1H1      | darkorange | 0.945  | 0.987  |
| EGFL8        | darkorange | -0.724 | -0.730 |
| EIF4H        | darkorange | 0.617  | 0.950  |
| ELFN1        | darkorange | 0.790  | 0.600  |
| EPHB2        | darkorange | 0.889  | 0.714  |
| EXOC7        | darkorange | 0.987  | 0.971  |
| FAM81B       | darkorange | -0.387 | -0.836 |
| FLRT1        | darkorange | 0.900  | 0.859  |
| FOXP4        | darkorange | 0.713  | 0.693  |
| FRAS1        | darkorange | 0.626  | 0.882  |
| FUCA1        | darkorange | 0.599  | 0.755  |
| GBA          | darkorange | 0.933  | 0.875  |
| GJC3         | darkorange | -0.671 | -0.762 |
| GNL2         | darkorange | -0.905 | -0.729 |
| GTF3C1       | darkorange | 0.828  | 0.808  |
| HERC2        | darkorange | 0.908  | 0.955  |
| HMGB3        | darkorange | -0.573 | -0.501 |
| HSCB         | darkorange | -0.931 | -0.844 |
| HSPD1        | darkorange | -0.838 | -0.629 |
| HUWE1        | darkorange | 0.934  | 0.896  |
| IL15         | darkorange | -0.684 | -0.679 |
| IL20RA       | darkorange | -0.819 | -0.781 |
| JUND         | darkorange | -0.748 | -0.805 |
| LAMB4        | darkorange | -0.571 | -0.631 |
| LARP1        | darkorange | 0.930  | 0.927  |
| LEPREL1      | darkorange | -0.437 | -0.729 |
| LYG2         | darkorange | -0.746 | -0.891 |
| MACC1        | darkorange | -0.586 | -0.710 |
| MALAT1       | darkorange | -0.884 | -0.983 |
| MAN2B2       | darkorange | 0.871  | 0.943  |
| MAX          | darkorange | -0.891 | -0.763 |
| MCM2         | darkorange | 0.951  | 0.760  |

|               |            |        |        |
|---------------|------------|--------|--------|
| MFN2          | darkorange | 0.921  | 0.947  |
| MKRN9P        | darkorange | 0.910  | 0.740  |
| MLL2          | darkorange | 0.781  | 0.724  |
| MPHOSPH6      | darkorange | -0.762 | -0.597 |
| MPP3          | darkorange | 0.725  | 0.828  |
| NOSTRIN       | darkorange | -0.670 | -0.621 |
| NPHP1         | darkorange | -0.916 | -0.891 |
| NUP210L       | darkorange | -0.940 | -0.800 |
| PKD1L1        | darkorange | -0.663 | -0.523 |
| PKD2L1        | darkorange | 0.568  | 0.703  |
| PLA2G5        | darkorange | -0.780 | -0.669 |
| POLE2         | darkorange | -0.898 | -0.835 |
| PRDM4         | darkorange | 0.866  | 0.909  |
| PRKD2         | darkorange | -0.822 | -0.618 |
| PRMT5         | darkorange | 0.926  | 0.846  |
| PRPF8         | darkorange | 0.965  | 0.851  |
| PSAP          | darkorange | 0.938  | 0.898  |
| PUM1          | darkorange | 0.912  | 0.637  |
| PYGL          | darkorange | -0.860 | -0.704 |
| RAB5B         | darkorange | 0.888  | 0.497  |
| RARRES1       | darkorange | -0.631 | -0.384 |
| RASAL1        | darkorange | 0.795  | 0.769  |
| RBM6          | darkorange | -0.840 | -0.865 |
| RFT1          | darkorange | 0.699  | 0.658  |
| RNF149        | darkorange | -0.832 | -0.887 |
| RNF19B        | darkorange | 0.794  | 0.494  |
| RP11-131L23.1 | darkorange | -0.929 | -0.923 |
| RP11-216B9.6  | darkorange | -0.907 | -0.541 |
| RP11-418J17.1 | darkorange | -0.746 | -0.741 |
| RP11-557J10.4 | darkorange | -0.874 | -0.766 |
| RP11-849H4.4  | darkorange | -0.692 | -0.495 |
| RP3-414A15.10 | darkorange | -0.394 | -0.814 |
| RRAS2         | darkorange | -0.916 | -0.734 |
| RSRC2         | darkorange | -0.899 | -0.718 |
| SBDSP1        | darkorange | -0.760 | -0.624 |
| SEC16A        | darkorange | 0.724  | 0.811  |
| SETD1B        | darkorange | 0.787  | 0.759  |
| SLC7A3        | darkorange | 0.717  | 0.418  |
| SLC7A6        | darkorange | 0.762  | 0.501  |
| SMCR7L        | darkorange | 0.778  | 0.729  |
| SNORD10       | darkorange | -0.671 | -0.753 |
| SRSF11        | darkorange | -0.957 | -0.958 |
| ST20          | darkorange | -0.761 | -0.681 |
| STK38         | darkorange | -0.911 | -0.952 |
| TAF11         | darkorange | -0.915 | -0.558 |
| TECTA         | darkorange | 0.762  | 0.858  |
| TPT1-AS1      | darkorange | -0.847 | -0.782 |

|           |            |        |        |
|-----------|------------|--------|--------|
| TRRAP     | darkorange | 0.844  | 0.671  |
| TSC2      | darkorange | 0.881  | 0.804  |
| TUSC1     | darkorange | -0.672 | -0.508 |
| URB1      | darkorange | 0.900  | 0.870  |
| USP22     | darkorange | 0.953  | 0.959  |
| VAV2      | darkorange | 0.673  | 0.405  |
| WDR77     | darkorange | 0.914  | 0.938  |
| WRB       | darkorange | 0.782  | 0.701  |
| WWP2      | darkorange | 0.914  | 0.740  |
| XPNPEP1   | darkorange | 0.681  | 0.505  |
| ZC2HC1B   | darkorange | -0.625 | -0.440 |
| ZDHC3     | darkorange | 0.834  | 0.753  |
| ZMYM3     | darkorange | 0.952  | 0.936  |
| ZNF286A   | darkorange | -0.850 | -0.646 |
| ZNF71     | darkorange | 0.868  | 0.898  |
| ZNF791    | darkorange | -0.915 | -0.641 |
| ZNF843    | darkorange | 0.853  | 0.511  |
| ZNF860    | darkorange | 0.712  | 0.733  |
| ZZEF1     | darkorange | 0.870  | 0.825  |
| ABCF1     | darkred    | 0.914  | 0.961  |
| ADPRHL2   | darkred    | 0.781  | 0.826  |
| ANGPTL6   | darkred    | 0.831  | 0.646  |
| B3GAT3    | darkred    | 0.912  | 0.894  |
| BLOC1S3   | darkred    | 0.668  | 0.597  |
| C10orf137 | darkred    | -0.850 | -0.848 |
| C10orf140 | darkred    | -0.664 | -0.539 |
| C11orf83  | darkred    | 0.722  | 0.626  |
| C17orf59  | darkred    | 0.697  | 0.765  |
| C18orf25  | darkred    | -0.876 | -0.774 |
| C19orf48  | darkred    | 0.811  | 0.709  |
| C20orf160 | darkred    | 0.716  | 0.687  |
| C22orf46  | darkred    | 0.746  | 0.735  |
| C3orf23   | darkred    | -0.926 | -0.807 |
| C6orf1    | darkred    | 0.927  | 0.788  |
| CAPN12    | darkred    | 0.513  | 0.632  |
| CDC7      | darkred    | -0.719 | -0.699 |
| CENPB     | darkred    | 0.887  | 0.875  |
| CHCHD5    | darkred    | 0.809  | 0.726  |
| CHMP1A    | darkred    | 0.893  | 0.752  |
| CHPF      | darkred    | 0.828  | 0.628  |
| CKAP2     | darkred    | -0.853 | -0.817 |
| CLPP      | darkred    | 0.795  | 0.862  |
| COMMD5    | darkred    | 0.767  | 0.738  |
| COX6B2    | darkred    | 0.806  | 0.713  |
| DDX20     | darkred    | -0.748 | -0.827 |
| DECR2     | darkred    | 0.911  | 0.882  |
| DEGS1     | darkred    | -0.768 | -0.503 |

|               |         |        |        |
|---------------|---------|--------|--------|
| DENND1B       | darkred | -0.748 | -0.841 |
| DGAT1         | darkred | 0.923  | 0.687  |
| DSE           | darkred | 0.924  | 0.663  |
| EIF3M         | darkred | -0.784 | -0.735 |
| ETFB          | darkred | 0.976  | 0.719  |
| FAM20C        | darkred | 0.750  | 0.606  |
| FAM3A         | darkred | 0.762  | 0.793  |
| FAM50A        | darkred | 0.938  | 0.833  |
| FAM71F1       | darkred | 0.401  | 0.701  |
| FAM96B        | darkred | 0.965  | 0.822  |
| FANCI         | darkred | -0.474 | -0.747 |
| FBL           | darkred | 0.933  | 0.813  |
| FIGNL1        | darkred | -0.676 | -0.719 |
| FOXF2         | darkred | 0.557  | 0.644  |
| FUBP1         | darkred | -0.824 | -0.710 |
| GAMT          | darkred | 0.714  | 0.747  |
| GNB2L1        | darkred | 0.897  | 0.915  |
| GPX1          | darkred | 0.972  | 0.788  |
| GS1-393G12.12 | darkred | 0.802  | 0.925  |
| HEXDC         | darkred | 0.723  | 0.796  |
| IMPA1         | darkred | -0.632 | -0.783 |
| INPP5K        | darkred | 0.884  | 0.704  |
| IQCB1         | darkred | -0.816 | -0.594 |
| ISOC2         | darkred | 0.878  | 0.839  |
| KDM3A         | darkred | -0.584 | -0.830 |
| KIAA0564      | darkred | -0.732 | -0.889 |
| KIAA1875      | darkred | 0.516  | 0.583  |
| KIF12         | darkred | 0.556  | 0.751  |
| KLRAP1        | darkred | -0.881 | -0.781 |
| KNTC1         | darkred | -0.631 | -0.799 |
| KXD1          | darkred | 0.607  | 0.793  |
| LINS          | darkred | -0.505 | -0.693 |
| LSM10         | darkred | 0.838  | 0.820  |
| MAD2L2        | darkred | 0.612  | 0.862  |
| MDM1          | darkred | -0.914 | -0.699 |
| MED27         | darkred | 0.947  | 0.898  |
| METTL1        | darkred | 0.617  | 0.673  |
| MFN1          | darkred | -0.855 | -0.886 |
| MMAB          | darkred | 0.895  | 0.574  |
| MPV17L2       | darkred | 0.712  | 0.820  |
| MST1R         | darkred | 0.859  | 0.727  |
| MYL6          | darkred | 0.869  | 0.714  |
| NAE1          | darkred | -0.759 | -0.800 |
| NAIF1         | darkred | 0.751  | 0.775  |
| NENF          | darkred | 0.559  | 0.728  |
| NFIC          | darkred | 0.802  | 0.835  |
| NSMCE1        | darkred | 0.919  | 0.829  |

|                |         |        |        |
|----------------|---------|--------|--------|
| NUP62          | darkred | 0.907  | 0.985  |
| PAPPA2         | darkred | 0.707  | 0.848  |
| PCMTD2         | darkred | -0.721 | -0.851 |
| PDCD11         | darkred | 0.824  | 0.647  |
| PGLS           | darkred | 0.925  | 0.882  |
| PIK3R6         | darkred | 0.597  | 0.577  |
| PPHLN1         | darkred | -0.720 | -0.668 |
| PPWD1          | darkred | -0.913 | -0.848 |
| PRDM5          | darkred | -0.630 | -0.746 |
| PSMB10         | darkred | 0.887  | 0.899  |
| PSME1          | darkred | 0.658  | 0.827  |
| RABL3          | darkred | -0.914 | -0.622 |
| RAD54B         | darkred | -0.814 | -0.630 |
| RASIP1         | darkred | 0.720  | 0.737  |
| RDBP           | darkred | 0.571  | 0.911  |
| RELB           | darkred | 0.688  | 0.739  |
| RILPL1         | darkred | 0.901  | 0.809  |
| RINT1          | darkred | -0.759 | -0.806 |
| RLF            | darkred | -0.844 | -0.848 |
| RNF166         | darkred | 0.881  | 0.795  |
| RNF181         | darkred | 0.903  | 0.892  |
| RP11-1407O15.2 | darkred | -0.882 | -0.845 |
| RP11-255H23.2  | darkred | -0.818 | -0.721 |
| RP11-497D6.2   | darkred | -0.787 | -0.804 |
| RP11-798M19.3  | darkred | -0.329 | -0.782 |
| RP4-758J18.2   | darkred | 0.880  | 0.697  |
| RPL8           | darkred | 0.969  | 0.896  |
| RPLPOP2        | darkred | 0.644  | 0.612  |
| RPRD2          | darkred | -0.585 | -0.900 |
| RPS2           | darkred | 0.655  | 0.907  |
| RPS3           | darkred | 0.931  | 0.814  |
| RPS5           | darkred | 0.935  | 0.820  |
| RPS6KB1        | darkred | -0.976 | -0.855 |
| RPSAP58        | darkred | 0.948  | 0.850  |
| RRP9           | darkred | 0.892  | 0.881  |
| SCML2          | darkred | -0.870 | -0.711 |
| SGTA           | darkred | 0.515  | 0.757  |
| SHARPIN        | darkred | 0.929  | 0.787  |
| SIRT6          | darkred | 0.871  | 0.754  |
| SLAMF8         | darkred | -0.552 | -0.684 |
| SLC24A5        | darkred | -0.891 | -0.953 |
| SLC25A10       | darkred | 0.898  | 0.888  |
| SLC35G2        | darkred | -0.625 | -0.757 |
| SLC38A7        | darkred | 0.865  | 0.907  |
| STK40          | darkred | 0.674  | 0.626  |
| STX4           | darkred | 0.711  | 0.618  |
| STXBP2         | darkred | 0.788  | 0.725  |

|            |               |        |        |
|------------|---------------|--------|--------|
| SULT1A2    | darkred       | 0.547  | 0.682  |
| SYNC       | darkred       | -0.774 | -0.869 |
| TDP2       | darkred       | -0.924 | -0.738 |
| TEN1       | darkred       | 0.504  | 0.875  |
| THOC6      | darkred       | 0.885  | 0.937  |
| TMEM147    | darkred       | 0.971  | 0.818  |
| TMEM180    | darkred       | 0.757  | 0.931  |
| TMEM237    | darkred       | -0.927 | -0.908 |
| TMPRSS13   | darkred       | 0.880  | 0.687  |
| TOR2A      | darkred       | 0.823  | 0.774  |
| TSPAN14    | darkred       | 0.489  | 0.631  |
| TSSC4      | darkred       | 0.883  | 0.813  |
| TTC39C     | darkred       | -0.430 | -0.890 |
| TUBE1      | darkred       | -0.917 | -0.839 |
| U2AF1L4    | darkred       | 0.750  | 0.777  |
| USP48      | darkred       | -0.814 | -0.655 |
| WNK4       | darkred       | 0.605  | 0.706  |
| YKT6       | darkred       | 0.822  | 0.913  |
| ZDHHC16    | darkred       | 0.635  | 0.887  |
| ZFP30      | darkred       | -0.706 | -0.756 |
| ZMYM6      | darkred       | -0.930 | -0.894 |
| ZNF214     | darkred       | -0.827 | -0.816 |
| ZNF449     | darkred       | -0.701 | -0.745 |
| ZNF524     | darkred       | 0.935  | 0.807  |
| AC005754.1 | darkturquoise | -0.746 | -0.772 |
| AC011497.1 | darkturquoise | 0.681  | 0.590  |
| AC018712.3 | darkturquoise | 0.654  | 0.875  |
| AC084809.2 | darkturquoise | 0.722  | 0.559  |
| AC092295.7 | darkturquoise | -0.749 | -0.815 |
| ACRBP      | darkturquoise | -0.609 | -0.816 |
| AGAP5      | darkturquoise | -0.681 | -0.679 |
| AKNA       | darkturquoise | -0.619 | -0.643 |
| ANKRD29    | darkturquoise | 0.932  | 0.938  |
| AQP8       | darkturquoise | -0.786 | -0.505 |
| ARMCX1     | darkturquoise | 0.648  | 0.950  |
| ATP1B1     | darkturquoise | 0.835  | 0.938  |
| ATP5F1     | darkturquoise | 0.695  | 0.696  |
| ATP6AP2    | darkturquoise | 0.829  | 0.913  |
| ATP6V1B2   | darkturquoise | 0.881  | 0.975  |
| BCL7C      | darkturquoise | -0.649 | -0.802 |
| BLOC1S1    | darkturquoise | -0.643 | -0.423 |
| C11orf16   | darkturquoise | -0.654 | -0.781 |
| C17orf75   | darkturquoise | 0.887  | 0.982  |
| C1orf144   | darkturquoise | -0.874 | -0.946 |
| C1orf74    | darkturquoise | 0.485  | 0.810  |
| C22orf24   | darkturquoise | 0.746  | 0.774  |
| C22orf31   | darkturquoise | -0.903 | -0.829 |

|               |               |        |        |
|---------------|---------------|--------|--------|
| C3orf71       | darkturquoise | -0.535 | -0.446 |
| C9orf57       | darkturquoise | -0.778 | -0.630 |
| CADPS         | darkturquoise | 0.815  | 0.922  |
| CADPS2        | darkturquoise | 0.770  | 0.947  |
| CALR          | darkturquoise | -0.669 | -0.805 |
| CCDC19        | darkturquoise | -0.573 | -0.701 |
| CCNI2         | darkturquoise | -0.776 | -0.649 |
| CCT6A         | darkturquoise | 0.791  | 0.919  |
| CERK          | darkturquoise | 0.891  | 0.966  |
| CNKS1         | darkturquoise | -0.747 | -0.522 |
| COPS4         | darkturquoise | 0.914  | 0.948  |
| CTD-2368P22.1 | darkturquoise | -0.754 | -0.752 |
| CUL2          | darkturquoise | 0.781  | 0.976  |
| DDX1          | darkturquoise | 0.859  | 0.929  |
| DDX19B        | darkturquoise | -0.822 | -0.674 |
| DKK1          | darkturquoise | 0.621  | 0.701  |
| DLEU1         | darkturquoise | -0.570 | -0.787 |
| DUSP18        | darkturquoise | -0.913 | -0.884 |
| DYNLL2        | darkturquoise | 0.838  | 0.870  |
| DYRK3         | darkturquoise | -0.698 | -0.804 |
| ECHDC3        | darkturquoise | -0.616 | -0.726 |
| ECM1          | darkturquoise | 0.731  | 0.818  |
| EFNB1         | darkturquoise | -0.825 | -0.856 |
| EIF4E2        | darkturquoise | 0.815  | 0.914  |
| ELF3          | darkturquoise | -0.634 | -0.792 |
| EMP3          | darkturquoise | -0.813 | -0.932 |
| ETNK2         | darkturquoise | -0.553 | -0.689 |
| FAM81A        | darkturquoise | 0.865  | 0.871  |
| FAP           | darkturquoise | 0.600  | 0.647  |
| FARSB         | darkturquoise | 0.875  | 0.934  |
| FBLN7         | darkturquoise | 0.796  | 0.864  |
| FBXO22        | darkturquoise | 0.819  | 0.894  |
| FGF11         | darkturquoise | -0.853 | -0.720 |
| GCNT7         | darkturquoise | -0.652 | -0.706 |
| GLRB          | darkturquoise | 0.811  | 0.969  |
| GPLD1         | darkturquoise | 0.697  | 0.511  |
| GPRASP1       | darkturquoise | 0.746  | 0.951  |
| GPRASP2       | darkturquoise | 0.848  | 0.977  |
| GPX7          | darkturquoise | -0.741 | -0.656 |
| HEBP1         | darkturquoise | -0.685 | -0.577 |
| HENMT1        | darkturquoise | 0.889  | 0.939  |
| HERC6         | darkturquoise | 0.719  | 0.924  |
| HHAT          | darkturquoise | 0.466  | 0.654  |
| HHLA3         | darkturquoise | -0.793 | -0.411 |
| HNRNPA0       | darkturquoise | 0.572  | 0.747  |
| HSDL1         | darkturquoise | 0.982  | 0.965  |
| HUNK          | darkturquoise | 0.633  | 0.844  |



|               |               |        |        |
|---------------|---------------|--------|--------|
| IGIP          | darkturquoise | 0.741  | 0.826  |
| IMMT          | darkturquoise | 0.657  | 0.934  |
| INPP4B        | darkturquoise | 0.764  | 0.717  |
| KCNC1         | darkturquoise | 0.918  | 0.946  |
| KCNS1         | darkturquoise | 0.868  | 0.811  |
| KIAA1383      | darkturquoise | 0.670  | 0.872  |
| KIFAP3        | darkturquoise | 0.895  | 0.930  |
| KLF17         | darkturquoise | -0.616 | -0.838 |
| KLHDC2        | darkturquoise | 0.764  | 0.963  |
| LMAN2L        | darkturquoise | -0.723 | -0.523 |
| MAP1LC3B2     | darkturquoise | 0.668  | 0.900  |
| MAP2K1        | darkturquoise | 0.893  | 0.952  |
| MAP2K5        | darkturquoise | 0.598  | 0.803  |
| MAT2B         | darkturquoise | 0.878  | 0.920  |
| MCM4          | darkturquoise | 0.698  | 0.949  |
| MED21         | darkturquoise | 0.857  | 0.774  |
| MKKS          | darkturquoise | 0.971  | 0.969  |
| MOB3A         | darkturquoise | -0.950 | -0.914 |
| NAP1L2        | darkturquoise | 0.773  | 0.946  |
| NIPAL2        | darkturquoise | 0.678  | 0.790  |
| NKIRAS1       | darkturquoise | 0.821  | 0.877  |
| OAT           | darkturquoise | 0.792  | 0.922  |
| PAIP2         | darkturquoise | 0.567  | 0.828  |
| PCMT1         | darkturquoise | 0.824  | 0.935  |
| PGAM4         | darkturquoise | 0.900  | 0.653  |
| PHF21A        | darkturquoise | -0.845 | -0.890 |
| PMPCB         | darkturquoise | 0.795  | 0.887  |
| PPA1          | darkturquoise | 0.896  | 0.946  |
| PRC1          | darkturquoise | 0.573  | 0.454  |
| PRR16         | darkturquoise | 0.794  | 0.888  |
| PRRT3-AS1     | darkturquoise | -0.625 | -0.753 |
| PTMA          | darkturquoise | -0.797 | -0.871 |
| QPCT          | darkturquoise | 0.899  | 0.901  |
| RAB11A        | darkturquoise | 0.900  | 0.920  |
| RAB8A         | darkturquoise | -0.797 | -0.874 |
| RBM11         | darkturquoise | 0.863  | 0.923  |
| REM2          | darkturquoise | 0.617  | 0.910  |
| RFWD2         | darkturquoise | 0.858  | 0.467  |
| RFX5          | darkturquoise | 0.614  | 0.582  |
| RIAD1         | darkturquoise | 0.677  | 0.694  |
| RNF145        | darkturquoise | 0.908  | 0.951  |
| RP11-103G8.2  | darkturquoise | -0.714 | -0.577 |
| RP11-154J22.1 | darkturquoise | -0.762 | -0.611 |
| RP11-265M18.2 | darkturquoise | 0.726  | 0.462  |
| RP11-298I3.4  | darkturquoise | -0.748 | -0.442 |
| RP11-446E24.4 | darkturquoise | -0.778 | -0.758 |
| RP11-472B18.1 | darkturquoise | -0.730 | -0.414 |

|               |               |        |        |
|---------------|---------------|--------|--------|
| RP1-164F3.8   | darkturquoise | -0.838 | -0.691 |
| RP11-77I22.3  | darkturquoise | 0.580  | 0.781  |
| RP11-950C14.3 | darkturquoise | -0.610 | -0.435 |
| RP5-836N10.1  | darkturquoise | -0.728 | -0.838 |
| RSPH6A        | darkturquoise | -0.686 | -0.649 |
| RSPO2         | darkturquoise | 0.878  | 0.876  |
| RTN4IP1       | darkturquoise | 0.669  | 0.924  |
| RWDD2A        | darkturquoise | 0.835  | 0.936  |
| RWDD2B        | darkturquoise | 0.528  | 0.865  |
| SEC22C        | darkturquoise | -0.669 | -0.590 |
| SEH1L         | darkturquoise | 0.895  | 0.957  |
| SFTPB         | darkturquoise | -0.839 | -0.836 |
| SH3BGRL2      | darkturquoise | 0.954  | 0.986  |
| SLC17A6       | darkturquoise | 0.584  | 0.782  |
| SLC25A12      | darkturquoise | 0.876  | 0.963  |
| SOX12         | darkturquoise | -0.724 | -0.508 |
| SPEN          | darkturquoise | -0.842 | -0.642 |
| STAT4         | darkturquoise | 0.784  | 0.758  |
| SUCLA2        | darkturquoise | 0.933  | 0.976  |
| SYS1          | darkturquoise | -0.767 | -0.724 |
| TCHP          | darkturquoise | -0.622 | -0.473 |
| TM6SF1        | darkturquoise | 0.919  | 0.970  |
| TMEM241       | darkturquoise | 0.753  | 0.940  |
| TPD52         | darkturquoise | 0.943  | 0.933  |
| TRIM21        | darkturquoise | -0.833 | -0.880 |
| TSPYL1        | darkturquoise | 0.754  | 0.944  |
| TTC19         | darkturquoise | 0.855  | 0.716  |
| UBXN10        | darkturquoise | 0.805  | 0.860  |
| VDAC1         | darkturquoise | 0.673  | 0.922  |
| VMA21         | darkturquoise | 0.775  | 0.936  |
| XAF1          | darkturquoise | -0.822 | -0.905 |
| ZFP28         | darkturquoise | 0.575  | 0.704  |
| ZNF16         | darkturquoise | -0.365 | -0.448 |
| ZNF385C       | darkturquoise | -0.925 | -0.324 |
| ZNF691        | darkturquoise | -0.843 | -0.842 |
| MARCH4        | green         | 0.761  | 0.890  |
| SEPT3         | green         | 0.898  | 0.961  |
| AASDH         | green         | -0.691 | -0.816 |
| ABAT          | green         | 0.775  | 0.740  |
| ABCC2         | green         | -0.833 | -0.833 |
| ABR           | green         | 0.740  | 0.970  |
| AC000068.5    | green         | -0.748 | -0.731 |
| AC005594.1    | green         | -0.729 | -0.786 |
| AC007038.7    | green         | -0.777 | -0.971 |
| AC007383.3    | green         | -0.924 | -0.659 |
| AC010883.5    | green         | -0.615 | -0.614 |
| AC017076.4    | green         | 0.840  | 0.920  |

|             |       |        |        |
|-------------|-------|--------|--------|
| AC017096.1  | green | 0.874  | 0.952  |
| AC046143.5  | green | -0.681 | -0.666 |
| AC064875.2  | green | 0.797  | 0.652  |
| AC107081.5  | green | -0.768 | -0.901 |
| AC125494.1  | green | -0.729 | -0.749 |
| AC138969.4  | green | -0.645 | -0.354 |
| AC140481.1  | green | 0.807  | 0.385  |
| ACAP1       | green | -0.653 | -0.745 |
| ACSM1       | green | -0.784 | -0.313 |
| ACVR1B      | green | 0.703  | 0.903  |
| ADAMTS3     | green | 0.917  | 0.760  |
| ADARB1      | green | 0.796  | 0.913  |
| ADCY1       | green | 0.850  | 0.968  |
| ADCY2       | green | 0.790  | 0.545  |
| ADRA1B      | green | 0.791  | 0.607  |
| AGAP2       | green | 0.836  | 0.985  |
| AGBL4       | green | 0.709  | 0.973  |
| AHRR        | green | 0.624  | 0.564  |
| AJAP1       | green | 0.680  | 0.896  |
| AL096869.5  | green | 0.815  | 0.523  |
| AL138968.1  | green | 0.877  | 0.964  |
| ALB         | green | -0.441 | -0.654 |
| ALPK1       | green | -0.868 | -0.804 |
| AMIGO2      | green | 0.557  | 0.608  |
| ANKRD10     | green | -0.702 | -0.530 |
| ANKRD23     | green | -0.887 | -0.788 |
| ANKRD6      | green | 0.664  | 0.904  |
| ANKS6       | green | -0.466 | -0.319 |
| ANO3        | green | 0.903  | 0.936  |
| ANXA3       | green | -0.605 | -0.657 |
| ANXA4       | green | -0.887 | -0.739 |
| AP000269.1  | green | -0.583 | -0.848 |
| AP000688.14 | green | -0.526 | -0.463 |
| AP000892.4  | green | -0.493 | -0.800 |
| AP006216.12 | green | -0.804 | -0.516 |
| APOBEC3H    | green | -0.328 | -0.668 |
| APOM        | green | -0.795 | -0.746 |
| AQP3        | green | 0.393  | 0.427  |
| ARF3        | green | 0.748  | 0.921  |
| ARHGAP25    | green | 0.651  | 0.576  |
| ARHGAP35    | green | 0.889  | 0.727  |
| ARHGAP44    | green | 0.785  | 0.958  |
| ARHGEF9     | green | 0.904  | 0.924  |
| ARMCX2      | green | 0.905  | 0.958  |
| ARNT2       | green | 0.623  | 0.878  |
| ARPP21      | green | 0.801  | 0.929  |
| ARRDC2      | green | -0.888 | -0.827 |

|           |       |        |        |
|-----------|-------|--------|--------|
| ARSD      | green | -0.845 | -0.926 |
| ARSJ      | green | -0.484 | -0.866 |
| ASAP1     | green | 0.679  | 0.519  |
| ASB4      | green | -0.854 | -0.695 |
| ASPHD2    | green | 0.870  | 0.945  |
| ASXL3     | green | 0.770  | 0.851  |
| ATCAY     | green | 0.819  | 0.788  |
| ATOH8     | green | -0.797 | -0.902 |
| ATP2B2    | green | 0.816  | 0.909  |
| ATPBD4    | green | -0.669 | -0.868 |
| B3GALNT2  | green | -0.471 | -0.866 |
| B4GALT1   | green | -0.822 | -0.736 |
| BACH1-IT1 | green | -0.707 | -0.739 |
| BAHD1     | green | 0.578  | 0.747  |
| BAI3      | green | 0.914  | 0.766  |
| BAZ2B     | green | -0.624 | -0.763 |
| BCKDHA    | green | -0.662 | -0.712 |
| BCL11A    | green | 0.633  | 0.815  |
| BCL2L14   | green | -0.650 | -0.647 |
| BCL2L15   | green | -0.570 | -0.643 |
| BCR       | green | 0.693  | 0.712  |
| BEST3     | green | -0.585 | -0.808 |
| BFSP1     | green | 0.680  | 0.668  |
| BNC2      | green | -0.752 | -0.631 |
| BOD1      | green | 0.654  | 0.683  |
| BRI3BP    | green | 0.598  | 0.712  |
| BTBD9     | green | 0.919  | 0.880  |
| BTG2      | green | -0.809 | -0.812 |
| BTN2A2    | green | -0.654 | -0.821 |
| BTRC      | green | 0.815  | 0.865  |
| BZRAP1    | green | 0.836  | 0.797  |
| BZW2      | green | 0.816  | 0.891  |
| C11orf34  | green | -0.553 | -0.675 |
| C11orf41  | green | 0.897  | 0.945  |
| C11orf95  | green | 0.752  | 0.436  |
| C12orf39  | green | -0.701 | -0.855 |
| C12orf52  | green | 0.684  | 0.966  |
| C12orf68  | green | 0.731  | 0.833  |
| C14orf102 | green | -0.744 | -0.526 |
| C14orf129 | green | 0.828  | 0.903  |
| C14orf180 | green | 0.708  | 0.411  |
| C16orf46  | green | 0.305  | 0.841  |
| C17orf39  | green | 0.549  | 0.691  |
| C17orf51  | green | 0.588  | 0.963  |
| C19orf18  | green | -0.842 | -0.757 |
| C19orf26  | green | 0.654  | 0.733  |
| C1orf21   | green | 0.767  | 0.754  |

|            |       |        |        |
|------------|-------|--------|--------|
| C1orf95    | green | 0.867  | 0.918  |
| C1orf98    | green | -0.519 | -0.543 |
| C1QTNF1    | green | -0.566 | -0.862 |
| C20orf43   | green | 0.636  | 0.512  |
| C21orf58   | green | -0.730 | -0.599 |
| C21orf62   | green | -0.804 | -0.771 |
| C21orf7    | green | -0.469 | -0.416 |
| C22orf40   | green | -0.668 | -0.424 |
| C2CD2L     | green | 0.819  | 0.938  |
| C2orf65    | green | 0.723  | 0.896  |
| C2orf82    | green | -0.599 | -0.652 |
| C3orf78    | green | -0.852 | -0.808 |
| C5orf62    | green | -0.521 | -0.960 |
| C6orf48    | green | -0.551 | -0.206 |
| C7orf61    | green | -0.711 | -0.746 |
| C8orf34    | green | 0.630  | 0.624  |
| C8orf46    | green | 0.724  | 0.954  |
| C9orf100   | green | -0.563 | -0.690 |
| CA10       | green | 0.863  | 0.977  |
| CA5B       | green | -0.804 | -0.725 |
| CABLES2    | green | 0.720  | 0.809  |
| CACNA1E    | green | 0.895  | 0.930  |
| CACNA1G    | green | 0.892  | 0.938  |
| CACNB1     | green | 0.786  | 0.946  |
| CACNG3     | green | 0.768  | 0.972  |
| CADM2-AS2  | green | -0.717 | -0.552 |
| CADM3      | green | 0.949  | 0.987  |
| CALB1      | green | 0.889  | 0.863  |
| CALM1      | green | 0.804  | 0.927  |
| CALM2      | green | 0.506  | 0.781  |
| CAMK2A     | green | 0.855  | 0.881  |
| CAMK4      | green | 0.729  | 0.934  |
| CAMKK2     | green | 0.934  | 0.950  |
| CAMKV      | green | 0.775  | 0.971  |
| CAP2       | green | 0.893  | 0.955  |
| CAPG       | green | -0.790 | -0.781 |
| CASS4      | green | -0.830 | -0.570 |
| CBLN1      | green | 0.763  | 0.805  |
| CBS        | green | -0.855 | -0.851 |
| CCDC113    | green | 0.561  | 0.877  |
| CCDC129    | green | -0.507 | -0.576 |
| CCDC13-AS1 | green | -0.823 | -0.427 |
| CCDC150    | green | -0.796 | -0.522 |
| CCDC84     | green | -0.667 | -0.749 |
| CCNB2      | green | -0.906 | -0.778 |
| CCNL2      | green | -0.932 | -0.722 |
| CCNY       | green | 0.826  | 0.788  |

|               |       |        |        |
|---------------|-------|--------|--------|
| CCT6P1        | green | -0.703 | -0.901 |
| CD200         | green | 0.905  | 0.941  |
| CDA           | green | -0.662 | -0.729 |
| CDC6          | green | 0.588  | 0.541  |
| CDH12         | green | 0.853  | 0.834  |
| CDH26         | green | -0.654 | -0.511 |
| CDH8          | green | 0.884  | 0.944  |
| CDK20         | green | 0.744  | 0.953  |
| CDK5R1        | green | 0.876  | 0.927  |
| CDNF          | green | -0.665 | -0.644 |
| CDON          | green | 0.816  | 0.629  |
| CECR6         | green | 0.876  | 0.892  |
| CELF2         | green | 0.812  | 0.799  |
| CGREF1        | green | 0.641  | 0.916  |
| CHCHD8        | green | -0.533 | -0.437 |
| CHMP7         | green | 0.845  | 0.815  |
| CHST15        | green | 0.532  | 0.872  |
| CHSY3         | green | 0.741  | 0.811  |
| CLDN5         | green | -0.587 | -0.836 |
| CLVS1         | green | 0.834  | 0.905  |
| CMIP          | green | 0.858  | 0.959  |
| CNNM1         | green | 0.810  | 0.667  |
| CNTN3         | green | 0.809  | 0.849  |
| CNTN4         | green | 0.819  | 0.843  |
| CNTN5         | green | 0.740  | 0.684  |
| CNTRL         | green | -0.785 | -0.857 |
| COL21A1       | green | -0.587 | -0.665 |
| COPZ1         | green | 0.696  | 0.850  |
| COPZ2         | green | -0.912 | -0.874 |
| CRISPLD1      | green | -0.742 | -0.705 |
| CSNK1A1P1     | green | -0.429 | -0.791 |
| CTA-211A9.5   | green | -0.588 | -0.733 |
| CTB-51J22.1   | green | -0.741 | -0.656 |
| CTC-774J1.2   | green | 0.731  | 0.494  |
| CTD-2024I7.13 | green | -0.879 | -0.785 |
| CTD-2270P14.3 | green | -0.901 | -0.567 |
| CTD-2560E9.3  | green | 0.927  | 0.840  |
| CTD-2561B21.9 | green | 0.802  | 0.779  |
| CTD-2651B20.3 | green | -0.709 | -0.566 |
| CX3CL1        | green | 0.914  | 0.890  |
| CYB561D1      | green | 0.848  | 0.866  |
| CYP4V2        | green | -0.497 | -0.728 |
| CYR61         | green | -0.827 | -0.892 |
| CYS1          | green | 0.701  | 0.244  |
| CYTH3         | green | 0.903  | 0.833  |
| DAB1          | green | 0.648  | 0.756  |
| DACT1         | green | 0.466  | 0.842  |

|          |       |        |        |
|----------|-------|--------|--------|
| DAGLA    | green | 0.713  | 0.929  |
| DCAF11   | green | 0.782  | 0.792  |
| DCAF6    | green | 0.947  | 0.950  |
| DCLK3    | green | 0.961  | 0.760  |
| DCUN1D3  | green | -0.479 | -0.571 |
| DDIT4    | green | -0.831 | -0.681 |
| DDR2     | green | -0.553 | -0.902 |
| DDTL     | green | -0.750 | -0.446 |
| DENND1A  | green | 0.671  | 0.836  |
| DFNB59   | green | -0.774 | -0.372 |
| DGKB     | green | 0.894  | 0.903  |
| DGKG     | green | -0.678 | -0.643 |
| DHRS2    | green | 0.745  | 0.476  |
| DHX32    | green | -0.743 | -0.849 |
| DIO1     | green | -0.660 | -0.712 |
| DIO3OS   | green | -0.470 | -0.548 |
| DISP2    | green | 0.800  | 0.945  |
| DLG3     | green | 0.871  | 0.920  |
| DLGAP3   | green | 0.865  | 0.946  |
| DLGAP4   | green | 0.930  | 0.941  |
| DOK6     | green | 0.703  | 0.873  |
| DPP6     | green | 0.751  | 0.882  |
| DRAM1    | green | -0.523 | -0.933 |
| DSCAM    | green | 0.822  | 0.971  |
| DSG3     | green | 0.641  | 0.530  |
| DUSP14   | green | 0.727  | 0.814  |
| DUSP6    | green | 0.603  | 0.650  |
| E2F3     | green | 0.721  | 0.908  |
| E2F7     | green | -0.713 | -0.297 |
| EFNB3    | green | 0.954  | 0.965  |
| EGR3     | green | 0.813  | 0.947  |
| EHBP1    | green | 0.642  | 0.620  |
| EIF1AX   | green | 0.339  | 0.612  |
| ELF2     | green | -0.817 | -0.909 |
| ELFN2    | green | 0.762  | 0.932  |
| ELP3     | green | 0.587  | 0.642  |
| EMP2     | green | -0.599 | -0.663 |
| EPAS1    | green | -0.795 | -0.728 |
| EPB41L4A | green | -0.646 | -0.608 |
| EPB41L4B | green | 0.900  | 0.931  |
| EPHA1    | green | -0.691 | -0.723 |
| EPHA4    | green | 0.831  | 0.937  |
| EPHA6    | green | 0.698  | 0.424  |
| ETV5     | green | 0.429  | 0.684  |
| EXOC6    | green | 0.783  | 0.873  |
| EXOSC10  | green | -0.496 | -0.728 |
| EXTL1    | green | 0.816  | 0.961  |

|            |       |        |        |
|------------|-------|--------|--------|
| FAM110B    | green | 0.611  | 0.598  |
| FAM110C    | green | 0.661  | 0.661  |
| FAM13A-AS1 | green | -0.706 | -0.731 |
| FAM155B    | green | 0.711  | 0.498  |
| FAM159A    | green | -0.705 | -0.467 |
| FAM161B    | green | 0.746  | 0.861  |
| FAM162A    | green | 0.370  | 0.572  |
| FAM176C    | green | -0.764 | -0.878 |
| FAM190A    | green | 0.753  | 0.612  |
| FAM198A    | green | -0.755 | -0.935 |
| FAM19A1    | green | 0.869  | 0.907  |
| FAM212B    | green | 0.811  | 0.474  |
| FAM22G     | green | -0.730 | -0.680 |
| FAM40B     | green | 0.713  | 0.813  |
| FAM46B     | green | -0.501 | -0.547 |
| FAM47A     | green | 0.615  | 0.479  |
| FAM65B     | green | 0.875  | 0.925  |
| FAM78B     | green | 0.862  | 0.869  |
| FBXL2      | green | 0.781  | 0.959  |
| FBXO34     | green | 0.832  | 0.876  |
| FBXO41     | green | 0.909  | 0.976  |
| FCHSD1     | green | -0.770 | -0.785 |
| FHOD3      | green | 0.881  | 0.963  |
| FIG4       | green | 0.817  | 0.897  |
| FITM1      | green | -0.638 | -0.670 |
| FKBP4      | green | 0.793  | 0.789  |
| FKBP9      | green | -0.527 | -0.426 |
| FLG        | green | 0.637  | 0.596  |
| FLRT2      | green | 0.684  | 0.741  |
| FNBP4      | green | -0.786 | -0.923 |
| FOXM1      | green | -0.816 | -0.787 |
| FOXP1      | green | 0.854  | 0.656  |
| FRA10AC1   | green | -0.700 | -0.476 |
| FSIP2      | green | -0.693 | -0.758 |
| FXR2       | green | 0.522  | 0.492  |
| GABBR2     | green | 0.907  | 0.871  |
| GABRA5     | green | 0.782  | 0.931  |
| GABRB3     | green | 0.895  | 0.964  |
| GALNTL6    | green | 0.760  | 0.873  |
| GATAD2A    | green | -0.747 | -0.740 |
| GFAP       | green | -0.799 | -0.924 |
| GGCT       | green | 0.621  | 0.713  |
| GGT5       | green | -0.490 | -0.877 |
| GGTA1P     | green | -0.735 | -0.630 |
| GJD2       | green | 0.676  | 0.807  |
| GJD4       | green | 0.891  | 0.916  |
| GK-AS1     | green | -0.631 | -0.482 |



|             |       |        |        |
|-------------|-------|--------|--------|
| GLIPR1L1    | green | -0.642 | -0.795 |
| GLOD4       | green | 0.544  | 0.858  |
| GLT8D2      | green | 0.856  | 0.679  |
| GLYR1       | green | 0.616  | 0.708  |
| GMPR        | green | -0.640 | -0.622 |
| GNAZ        | green | 0.790  | 0.943  |
| GNG4        | green | 0.406  | 0.807  |
| GNPTAB      | green | 0.483  | 0.573  |
| GOLGA2B     | green | -0.706 | -0.717 |
| GOSR2       | green | 0.713  | 0.562  |
| GPATCH8     | green | -0.699 | -0.807 |
| GPM6A       | green | 0.562  | 0.578  |
| GPR153      | green | 0.921  | 0.426  |
| GPR26       | green | 0.774  | 0.644  |
| GPR75       | green | -0.725 | -0.719 |
| GPR83       | green | 0.696  | 0.556  |
| GPRIN1      | green | 0.823  | 0.942  |
| GRAMD1B     | green | 0.841  | 0.871  |
| GREM2       | green | 0.928  | 0.768  |
| GRIA1       | green | 0.855  | 0.964  |
| GRIA2       | green | 0.877  | 0.874  |
| GRIA3       | green | 0.873  | 0.778  |
| GRIN2B      | green | 0.871  | 0.814  |
| GRK5        | green | 0.858  | 0.647  |
| GS1-211B7.1 | green | 0.612  | 0.876  |
| GSG1L       | green | 0.692  | 0.910  |
| GSK3A       | green | 0.779  | 0.958  |
| GSTM2P1     | green | -0.500 | -0.402 |
| GYS2        | green | -0.859 | -0.571 |
| HAPLN1      | green | 0.208  | 0.443  |
| HCN4        | green | 0.789  | 0.795  |
| HES1        | green | -0.784 | -0.623 |
| HESX1       | green | -0.582 | -0.509 |
| HIST1H3D    | green | 0.452  | 0.422  |
| HIVEP2      | green | 0.673  | 0.816  |
| HIVEP3      | green | 0.627  | 0.625  |
| HLX         | green | -0.619 | -0.564 |
| HMP19       | green | 0.966  | 0.958  |
| HOMER1      | green | 0.701  | 0.675  |
| HOMER3      | green | -0.849 | -0.738 |
| HPCAL4      | green | 0.951  | 0.918  |
| HPD         | green | -0.816 | -0.618 |
| HPGD        | green | 0.293  | 0.594  |
| HRASLS      | green | 0.867  | 0.828  |
| HSPBAP1     | green | -0.604 | -0.757 |
| HTR2A       | green | 0.825  | 0.831  |
| HTR4        | green | 0.648  | 0.796  |

|            |       |        |        |
|------------|-------|--------|--------|
| HTR7P1     | green | 0.753  | 0.839  |
| HTT        | green | 0.858  | 0.935  |
| HYOU1      | green | 0.849  | 0.707  |
| ID1        | green | -0.755 | -0.614 |
| ID3        | green | -0.882 | -0.674 |
| IDI2-AS1   | green | -0.586 | -0.827 |
| IDS        | green | 0.878  | 0.933  |
| IFIT1      | green | 0.681  | 0.833  |
| IGSF3      | green | 0.749  | 0.858  |
| IL12A      | green | -0.627 | -0.753 |
| IMPG1      | green | 0.694  | 0.697  |
| INHA       | green | -0.141 | -0.473 |
| INPP5B     | green | -0.766 | -0.885 |
| IPO9       | green | 0.731  | 0.366  |
| IQCD       | green | -0.206 | -0.291 |
| IQSEC2     | green | 0.906  | 0.981  |
| ITGA9      | green | 0.761  | 0.602  |
| JOSD1      | green | 0.725  | 0.796  |
| JPH1       | green | 0.854  | 0.831  |
| KALRN      | green | 0.803  | 0.933  |
| KCNA4      | green | 0.961  | 0.905  |
| KCNAB1-AS2 | green | -0.595 | -0.378 |
| KCNB2      | green | 0.674  | 0.910  |
| KCNC3      | green | 0.814  | 0.968  |
| KCNE4      | green | -0.853 | -0.883 |
| KCNG1      | green | 0.442  | 0.637  |
| KCNH5      | green | 0.852  | 0.796  |
| KCNIP3     | green | 0.818  | 0.797  |
| KCNJ13     | green | -0.681 | -0.765 |
| KCNQ2      | green | 0.851  | 0.902  |
| KCNQ4      | green | 0.582  | 0.840  |
| KCTD1      | green | 0.764  | 0.776  |
| KDM1A      | green | 0.771  | 0.692  |
| KIAA0182   | green | 0.651  | 0.960  |
| KIAA0319   | green | 0.768  | 0.631  |
| KIAA0319L  | green | 0.612  | 0.251  |
| KIAA0408   | green | 0.445  | 0.761  |
| KIAA0513   | green | 0.799  | 0.923  |
| KIAA0753   | green | 0.716  | 0.877  |
| KIAA1045   | green | 0.893  | 0.945  |
| KIAA1191   | green | 0.901  | 0.805  |
| KIAA1549   | green | 0.906  | 0.954  |
| KIAA1644   | green | 0.895  | 0.970  |
| KIF21B     | green | 0.810  | 0.825  |
| KIF26B     | green | 0.692  | 0.646  |
| KIF3B      | green | 0.918  | 0.729  |
| KIF3C      | green | 0.850  | 0.962  |

|           |       |        |        |
|-----------|-------|--------|--------|
| KIF5C     | green | 0.536  | 0.819  |
| KLHL14    | green | 0.532  | 0.733  |
| KLHL2     | green | 0.842  | 0.843  |
| KLHL29    | green | 0.726  | 0.938  |
| CLK5      | green | 0.610  | 0.562  |
| KNDC1     | green | 0.753  | 0.907  |
| KRBA2     | green | -0.834 | -0.638 |
| KRTCAP3   | green | -0.575 | -0.882 |
| KSR2      | green | 0.562  | 0.795  |
| LANCL2    | green | 0.760  | 0.905  |
| LASP1     | green | 0.898  | 0.923  |
| LCTL      | green | -0.646 | -0.519 |
| LDB2      | green | 0.946  | 0.951  |
| LEAP2     | green | -0.895 | -0.909 |
| LENG8-AS1 | green | -0.613 | -0.904 |
| LGALS4    | green | -0.900 | -0.834 |
| LINC00086 | green | 0.768  | 0.891  |
| LINC00087 | green | 0.787  | 0.852  |
| LINC00094 | green | 0.629  | 0.958  |
| LINC00115 | green | -0.465 | -0.722 |
| LINC00174 | green | -0.795 | -0.960 |
| LINC00473 | green | 0.328  | 0.463  |
| LINC00578 | green | -0.638 | -0.881 |
| LINGO1    | green | 0.847  | 0.931  |
| LINGO2    | green | 0.775  | 0.454  |
| LMO7      | green | 0.752  | 0.863  |
| LMOD1     | green | -0.669 | -0.784 |
| LMTK3     | green | 0.726  | 0.847  |
| LONRF2    | green | 0.823  | 0.882  |
| LPCAT1    | green | 0.415  | 0.791  |
| LPPR5     | green | 0.804  | 0.938  |
| LRFN2     | green | 0.758  | 0.944  |
| LRP2BP    | green | -0.542 | -0.739 |
| LRRC59    | green | 0.690  | 0.496  |
| LRRC7     | green | 0.664  | 0.933  |
| LRRN2     | green | 0.624  | 0.902  |
| LRRTM4    | green | 0.766  | 0.959  |
| LTBP1     | green | -0.804 | -0.888 |
| LUC7L2    | green | -0.672 | -0.802 |
| LUZP1     | green | 0.660  | 0.599  |
| LY6G5B    | green | -0.336 | -0.644 |
| LYSMD1    | green | 0.624  | 0.826  |
| LZTS1     | green | 0.779  | 0.765  |
| MAMLD1    | green | 0.754  | 0.937  |
| MAN1A1    | green | 0.733  | 0.939  |
| MAP1A     | green | 0.793  | 0.860  |
| MAP3K8    | green | -0.845 | -0.840 |

|            |       |        |        |
|------------|-------|--------|--------|
| MAP7D3     | green | -0.668 | -0.738 |
| MARK1      | green | 0.799  | 0.843  |
| MARK2      | green | 0.805  | 0.836  |
| MAST2      | green | 0.640  | 0.710  |
| MAST3      | green | 0.792  | 0.920  |
| MATN3      | green | -0.592 | -0.711 |
| MCHR2      | green | 0.739  | 0.630  |
| MCM3AP-AS1 | green | -0.748 | -0.668 |
| MCU        | green | 0.837  | 0.804  |
| MED30      | green | -0.575 | -0.812 |
| MEF2D      | green | 0.733  | 0.931  |
| MEST       | green | 0.835  | 0.921  |
| METAP1     | green | 0.759  | 0.901  |
| MFSD4      | green | 0.955  | 0.979  |
| MGAT5B     | green | 0.769  | 0.860  |
| MICB       | green | -0.772 | -0.693 |
| MIR145     | green | -0.485 | -0.643 |
| MIR210HG   | green | -0.786 | -0.765 |
| MIR4500HG  | green | 0.674  | 0.854  |
| MIR635     | green | -0.734 | -0.734 |
| MLIP       | green | 0.656  | 0.805  |
| MMD        | green | 0.768  | 0.764  |
| MMP24      | green | 0.769  | 0.874  |
| MOGAT1     | green | -0.595 | -0.629 |
| MORN4      | green | 0.636  | 0.714  |
| MOXD1      | green | -0.839 | -0.739 |
| MPL        | green | 0.565  | 0.729  |
| MRPL3      | green | 0.548  | 0.977  |
| MRPL37     | green | 0.789  | 0.945  |
| MRPS23     | green | 0.369  | 0.826  |
| MSLN       | green | -0.527 | -0.545 |
| MTA3       | green | 0.934  | 0.916  |
| MTERFD3    | green | -0.383 | -0.639 |
| MTUS2      | green | 0.846  | 0.776  |
| MXD3       | green | -0.589 | -0.804 |
| MYBPHL     | green | -0.791 | -0.802 |
| MYC        | green | -0.663 | -0.686 |
| MYH10      | green | 0.842  | 0.857  |
| MYL12A     | green | -0.780 | -0.909 |
| MYL3       | green | -0.618 | -0.631 |
| MYLK3      | green | 0.718  | 0.731  |
| MYO16      | green | 0.603  | 0.775  |
| MYOF       | green | -0.700 | -0.541 |
| MYT1L      | green | 0.943  | 0.972  |
| NACA       | green | 0.168  | 0.309  |
| NACC1      | green | 0.766  | 0.809  |
| NALCN-AS1  | green | -0.482 | -0.562 |

|         |       |        |        |
|---------|-------|--------|--------|
| NCEH1   | green | 0.938  | 0.855  |
| NDEL1   | green | 0.674  | 0.934  |
| NEDD9   | green | -0.666 | -0.745 |
| NEK2    | green | 0.793  | 0.818  |
| NEK9    | green | -0.859 | -0.754 |
| NETO2   | green | 0.763  | 0.899  |
| NEURL1B | green | 0.624  | 0.761  |
| NEUROD6 | green | 0.669  | 0.847  |
| NFKBIA  | green | -0.687 | -0.940 |
| NFKBIZ  | green | -0.781 | -0.829 |
| NHLRC1  | green | 0.494  | 0.755  |
| NLK     | green | 0.739  | 0.962  |
| NNAT    | green | 0.808  | 0.803  |
| NOP14   | green | -0.717 | -0.250 |
| NOV     | green | 0.778  | 0.925  |
| NOVA2   | green | 0.720  | 0.977  |
| NOXRED1 | green | -0.715 | -0.667 |
| NPL     | green | -0.789 | -0.819 |
| NPTN    | green | 0.756  | 0.925  |
| NPTXR   | green | 0.824  | 0.962  |
| NPY1R   | green | 0.645  | 0.699  |
| NR2C1   | green | -0.702 | -0.457 |
| NRN1    | green | 0.732  | 0.907  |
| NRSN1   | green | 0.644  | 0.892  |
| NTPCR   | green | 0.602  | 0.728  |
| NTRK3   | green | 0.773  | 0.782  |
| NTSR1   | green | 0.550  | 0.788  |
| NUP160  | green | -0.808 | -0.883 |
| OR1411  | green | 0.884  | 0.889  |
| OSBPL11 | green | -0.778 | -0.874 |
| OSTBETA | green | -0.826 | -0.670 |
| OTOF    | green | 0.636  | 0.615  |
| OTOS    | green | -0.812 | -0.921 |
| OTUB2   | green | 0.821  | 0.854  |
| OXNAD1  | green | 0.856  | 0.823  |
| PACRG   | green | 0.736  | 0.775  |
| PAK7    | green | 0.872  | 0.871  |
| PAPPA   | green | -0.454 | -0.871 |
| PARVA   | green | -0.457 | -0.829 |
| PBLD    | green | -0.862 | -0.738 |
| PBX2    | green | 0.357  | 0.719  |
| PCBD2   | green | -0.771 | -0.939 |
| PCDH19  | green | 0.715  | 0.831  |
| PCDH20  | green | 0.778  | 0.828  |
| PCDH7   | green | 0.787  | 0.728  |
| PCNXL2  | green | 0.861  | 0.933  |
| PCP4L1  | green | 0.580  | 0.793  |

|          |       |        |        |
|----------|-------|--------|--------|
| PCYT1A   | green | -0.858 | -0.879 |
| PDE8B    | green | 0.815  | 0.519  |
| PDGFA    | green | -0.689 | -0.382 |
| PDHX     | green | 0.773  | 0.860  |
| PDIA6    | green | 0.639  | 0.328  |
| PDPK1    | green | 0.869  | 0.862  |
| PDYN     | green | 0.543  | 0.481  |
| PDZD2    | green | 0.872  | 0.485  |
| PFKFB1   | green | -0.769 | -0.369 |
| PGAM5    | green | 0.610  | 0.913  |
| PHACTR1  | green | 0.884  | 0.867  |
| PHF23    | green | 0.620  | 0.610  |
| PHF7     | green | -0.606 | -0.628 |
| PID1     | green | 0.923  | 0.855  |
| PIP4K2B  | green | 0.937  | 0.958  |
| PIP4K2C  | green | 0.890  | 0.904  |
| PIP5K1B  | green | 0.768  | 0.911  |
| PITPNM2  | green | 0.746  | 0.914  |
| PITPNM3  | green | 0.838  | 0.962  |
| PKD1L2   | green | -0.917 | -0.237 |
| PKD2     | green | -0.764 | -0.906 |
| PLAUR    | green | -0.782 | -0.859 |
| PLCE1    | green | -0.730 | -0.845 |
| PLD3     | green | 0.610  | 0.890  |
| PLK2     | green | 0.869  | 0.878  |
| PLP2     | green | -0.743 | -0.844 |
| PLS1     | green | 0.784  | 0.797  |
| PLXNA2   | green | 0.773  | 0.788  |
| PLXNA4   | green | 0.872  | 0.946  |
| PMAIP1   | green | -0.469 | -0.787 |
| PMFBP1   | green | -0.705 | -0.615 |
| POLR2K   | green | 0.504  | 0.786  |
| POU5F1P3 | green | -0.710 | -0.459 |
| PPAP2A   | green | -0.527 | -0.849 |
| PPFIA1   | green | -0.870 | -0.965 |
| PPIEL    | green | -0.686 | -0.613 |
| PPP1R11  | green | 0.474  | 0.957  |
| PPP1R14C | green | 0.870  | 0.874  |
| PPP2R2C  | green | 0.791  | 0.964  |
| PPP4R4   | green | 0.856  | 0.954  |
| PPPDE2   | green | 0.635  | 0.849  |
| PRAGMIN  | green | 0.788  | 0.813  |
| PRDM11   | green | 0.761  | 0.823  |
| PRDM8    | green | 0.866  | 0.891  |
| PRKAG2   | green | 0.747  | 0.799  |
| PRKCB    | green | 0.844  | 0.893  |
| PRKCD    | green | 0.899  | 0.832  |

|           |       |        |        |
|-----------|-------|--------|--------|
| PRKG2     | green | 0.817  | 0.870  |
| PRPS2     | green | 0.766  | 0.876  |
| PRR19     | green | 0.880  | 0.562  |
| PRRC2A    | green | 0.803  | 0.771  |
| PRRG3     | green | 0.900  | 0.906  |
| PRRT1     | green | 0.646  | 0.823  |
| PRSS12    | green | 0.810  | 0.800  |
| PRSS48    | green | -0.689 | -0.633 |
| PRX       | green | -0.679 | -0.760 |
| PSD3      | green | 0.724  | 0.838  |
| PTBP1     | green | -0.772 | -0.855 |
| PTCD1     | green | -0.784 | -0.455 |
| PTDSS1    | green | 0.795  | 0.902  |
| PTGDR2    | green | -0.650 | -0.487 |
| PTHLH     | green | 0.719  | 0.644  |
| PTPN21    | green | -0.907 | -0.928 |
| PTPN7     | green | -0.557 | -0.459 |
| PTPRA     | green | 0.618  | 0.856  |
| PTPRN2    | green | 0.897  | 0.940  |
| PTPRO     | green | 0.891  | 0.935  |
| PVRL3     | green | 0.773  | 0.491  |
| PVRL3-AS1 | green | 0.855  | 0.709  |
| PXDC1     | green | -0.812 | -0.937 |
| PXN       | green | -0.918 | -0.725 |
| RAB11FIP4 | green | 0.828  | 0.935  |
| RAB15     | green | 0.921  | 0.915  |
| RAB25     | green | -0.742 | -0.743 |
| RAB35     | green | 0.707  | 0.800  |
| RAB3D     | green | 0.750  | 0.511  |
| RAB3IL1   | green | -0.786 | -0.768 |
| RAB7L1    | green | -0.625 | -0.761 |
| RABGEF1   | green | -0.787 | -0.741 |
| RABIF     | green | 0.832  | 0.959  |
| RAD23B    | green | 0.689  | 0.889  |
| RAD51C    | green | 0.837  | 0.801  |
| RAD52     | green | -0.882 | -0.414 |
| RAE1      | green | 0.713  | 0.800  |
| RALYL     | green | 0.850  | 0.883  |
| RAP1GAP2  | green | 0.754  | 0.936  |
| RAP2B     | green | 0.554  | 0.826  |
| RAPGEF1   | green | 0.884  | 0.561  |
| RARB      | green | 0.847  | 0.886  |
| RASL12    | green | -0.871 | -0.933 |
| RASSF4    | green | -0.959 | -0.849 |
| RASSF5    | green | 0.734  | 0.899  |
| RBFOX2    | green | 0.880  | 0.915  |
| RBM47     | green | -0.529 | -0.795 |

|                |       |        |        |
|----------------|-------|--------|--------|
| RBMS2          | green | -0.846 | -0.822 |
| RBPMS          | green | -0.477 | -0.852 |
| RERE           | green | 0.467  | 0.624  |
| RFTN1          | green | 0.813  | 0.763  |
| RG9MTD3        | green | -0.709 | -0.910 |
| RGMB           | green | 0.865  | 0.869  |
| RGS19          | green | 0.691  | 0.313  |
| RGS6           | green | 0.870  | 0.941  |
| RIC3           | green | 0.690  | 0.441  |
| RIMBP2         | green | 0.940  | 0.977  |
| RIMS1          | green | 0.659  | 0.696  |
| RIMS3          | green | 0.890  | 0.896  |
| RIMS4          | green | 0.764  | 0.898  |
| RIN2           | green | -0.841 | -0.841 |
| RIN3           | green | -0.566 | -0.608 |
| RIPK1          | green | -0.670 | -0.953 |
| RNF165         | green | 0.852  | 0.899  |
| RNF8           | green | 0.676  | 0.846  |
| ROM1           | green | -0.855 | -0.905 |
| RP11-1134I14.8 | green | 0.812  | 0.799  |
| RP11-152N13.5  | green | -0.572 | -0.413 |
| RP11-157P1.4   | green | -0.216 | -0.767 |
| RP11-16E12.2   | green | -0.410 | -0.638 |
| RP11-185P18.1  | green | 0.648  | 0.816  |
| RP11-186N15.3  | green | -0.764 | -0.784 |
| RP11-196G18.3  | green | -0.537 | -0.404 |
| RP11-206L10.1  | green | -0.538 | -0.627 |
| RP11-228B15.4  | green | -0.789 | -0.605 |
| RP11-236J17.6  | green | 0.723  | 0.368  |
| RP11-255G12.1  | green | -0.555 | -0.561 |
| RP11-298E9.3   | green | -0.651 | -0.670 |
| RP11-29H23.1   | green | -0.878 | -0.571 |
| RP11-302J23.1  | green | 0.840  | 0.407  |
| RP11-307C19.3  | green | 0.816  | 0.366  |
| RP11-309L24.4  | green | 0.767  | 0.688  |
| RP11-315I20.1  | green | -0.739 | -0.672 |
| RP11-31F19.1   | green | -0.794 | -0.781 |
| RP11-320N21.1  | green | -0.637 | -0.370 |
| RP11-330L19.4  | green | -0.712 | -0.858 |
| RP11-365N19.2  | green | -0.911 | -0.762 |
| RP11-366M4.11  | green | -0.868 | -0.457 |
| RP11-367J11.4  | green | -0.502 | -0.778 |
| RP11-379F4.4   | green | 0.709  | 0.631  |
| RP11-395P17.3  | green | -0.791 | -0.422 |
| RP11-429G19.2  | green | -0.534 | -0.710 |
| RP11-451M19.3  | green | -0.842 | -0.570 |
| RP11-468E2.4   | green | -0.772 | -0.799 |



|               |       |        |        |
|---------------|-------|--------|--------|
| RP11-473O4.3  | green | -0.615 | -0.745 |
| RP11-473O4.5  | green | 0.706  | 0.854  |
| RP11-476E15.3 | green | 0.898  | 0.774  |
| RP11-521C20.4 | green | -0.682 | -0.757 |
| RP11-586D19.1 | green | 0.919  | 0.967  |
| RP11-629G13.1 | green | -0.711 | -0.538 |
| RP11-669N7.3  | green | 0.562  | 0.522  |
| RP11-6D1.6    | green | -0.733 | -0.628 |
| RP11-94C24.10 | green | 0.803  | 0.789  |
| RP13-530H6.2  | green | -0.558 | -0.426 |
| RP3-510L9.1   | green | -0.528 | -0.803 |
| RP4-635E18.7  | green | -0.607 | -0.611 |
| RP4-669P10.18 | green | 0.300  | 0.859  |
| RP4-694B14.5  | green | -0.726 | -0.739 |
| RP5-1055C14.7 | green | -0.886 | -0.704 |
| RP5-981L23.1  | green | -0.505 | -0.683 |
| RP5-997D16.2  | green | -0.745 | -0.700 |
| RPAIN         | green | -0.838 | -0.323 |
| RPH3A         | green | 0.596  | 0.948  |
| RPL17         | green | 0.764  | 0.521  |
| RPL39L        | green | 0.749  | 0.867  |
| RTN4RL1       | green | 0.801  | 0.966  |
| RUNX3         | green | -0.637 | -0.789 |
| RYK           | green | -0.651 | -0.945 |
| S100A10       | green | -0.656 | -0.451 |
| S100A2        | green | -0.855 | -0.916 |
| SAPCD1-AS1    | green | 0.592  | 0.274  |
| SATB1         | green | 0.842  | 0.955  |
| SATB2         | green | 0.718  | 0.881  |
| SCARNA20      | green | -0.593 | -0.577 |
| SCN11A        | green | -0.780 | -0.704 |
| SCN2A         | green | 0.642  | 0.868  |
| SCN3B         | green | 0.846  | 0.939  |
| SDC1          | green | 0.871  | 0.474  |
| SDK1          | green | 0.660  | 0.686  |
| SDPR          | green | -0.626 | -0.891 |
| SELP          | green | -0.769 | -0.333 |
| SEMA4F        | green | 0.783  | 0.928  |
| SERINC2       | green | -0.785 | -0.696 |
| SERPINF2      | green | -0.773 | -0.663 |
| SFXN1         | green | 0.497  | 0.928  |
| SH2D4A        | green | -0.757 | -0.694 |
| SH3KBP1       | green | 0.686  | 0.738  |
| SH3PXD2A      | green | 0.683  | 0.762  |
| SH3RF3        | green | 0.516  | 0.715  |
| SHANK1        | green | 0.893  | 0.981  |
| SHANK2        | green | 0.892  | 0.956  |

|            |       |        |        |
|------------|-------|--------|--------|
| SHISA9     | green | 0.795  | 0.783  |
| SHMT1      | green | -0.735 | -0.612 |
| SHROOM3    | green | 0.601  | 0.713  |
| SIAH2      | green | 0.731  | 0.922  |
| SIAH3      | green | 0.459  | 0.660  |
| SIRPA      | green | 0.718  | 0.896  |
| SKAP2      | green | 0.697  | 0.920  |
| SLC16A3    | green | -0.772 | -0.743 |
| SLC17A7    | green | 0.800  | 0.963  |
| SLC23A1    | green | -0.598 | -0.539 |
| SLC24A1    | green | -0.743 | -0.411 |
| SLC24A4    | green | 0.529  | 0.626  |
| SLC28A2    | green | -0.604 | -0.860 |
| SLC2A1     | green | -0.794 | -0.569 |
| SLC2A3     | green | 0.837  | 0.330  |
| SLC30A3    | green | 0.725  | 0.908  |
| SLC43A3    | green | -0.871 | -0.790 |
| SLC44A5    | green | 0.652  | 0.537  |
| SLC45A4    | green | 0.817  | 0.907  |
| SLC8A2     | green | 0.764  | 0.979  |
| SLC8A3     | green | 0.685  | 0.936  |
| SLCO2A1    | green | 0.834  | 0.874  |
| SMAD3      | green | 0.764  | 0.871  |
| SMAP2      | green | 0.867  | 0.974  |
| SMARCA2    | green | 0.796  | 0.525  |
| SMARCD2    | green | -0.950 | -0.777 |
| SMC1B      | green | -0.748 | -0.585 |
| SMG7       | green | 0.716  | 0.836  |
| SMPD3      | green | 0.804  | 0.895  |
| SMTNL2     | green | -0.531 | -0.948 |
| SNHG12     | green | -0.712 | -0.826 |
| SNORA65    | green | -0.723 | -0.809 |
| SNORD109A  | green | -0.452 | -0.768 |
| SNORD69    | green | -0.741 | -0.509 |
| SNTB1      | green | -0.550 | -0.890 |
| SNX2       | green | 0.776  | 0.898  |
| SOBP       | green | 0.811  | 0.708  |
| SORBS2     | green | 0.890  | 0.794  |
| SPAG6      | green | 0.511  | 0.830  |
| SPRN       | green | 0.824  | 0.887  |
| SPTB       | green | 0.779  | 0.915  |
| SPTBN2     | green | 0.725  | 0.969  |
| SRGAP3     | green | 0.799  | 0.851  |
| SRPRB      | green | 0.616  | 0.763  |
| SRPX2      | green | -0.678 | -0.666 |
| SRSF7      | green | 0.637  | 0.605  |
| ST6GALNAC2 | green | -0.780 | -0.637 |

|             |       |        |        |
|-------------|-------|--------|--------|
| ST6GALNAC5  | green | 0.887  | 0.844  |
| ST7-AS1     | green | -0.845 | -0.847 |
| STAG3       | green | -0.559 | -0.456 |
| STARD13-AS2 | green | -0.612 | -0.628 |
| STC2        | green | -0.779 | -0.700 |
| STIM1       | green | 0.693  | 0.920  |
| STIP1       | green | 0.803  | 0.432  |
| STOX2       | green | 0.575  | 0.874  |
| STRAP       | green | 0.815  | 0.925  |
| STX19       | green | -0.854 | -0.386 |
| STXBP1      | green | 0.727  | 0.946  |
| SUSD4       | green | 0.835  | 0.903  |
| SYNGAP1     | green | 0.867  | 0.965  |
| SYNPO       | green | 0.858  | 0.888  |
| SYT15       | green | 0.568  | 0.713  |
| SYTL4       | green | -0.739 | -0.798 |
| TAC3        | green | 0.787  | 0.651  |
| TACR2       | green | 0.828  | 0.925  |
| TAF4B       | green | 0.851  | 0.637  |
| TAF8        | green | -0.839 | -0.760 |
| TAS2R20     | green | -0.620 | -0.412 |
| TATDN2      | green | 0.884  | 0.962  |
| TBC1D22B    | green | 0.948  | 0.770  |
| TC2N        | green | 0.774  | 0.663  |
| TCF7L2      | green | -0.750 | -0.807 |
| TEF         | green | 0.558  | 0.778  |
| TEK         | green | 0.897  | 0.716  |
| TENC1       | green | -0.728 | -0.864 |
| TGFB3       | green | -0.754 | -0.724 |
| TIMP3       | green | -0.735 | -0.853 |
| TIPARP-AS1  | green | -0.487 | -0.560 |
| TM2D3       | green | 0.810  | 0.772  |
| TMEM127     | green | 0.675  | 0.826  |
| TMEM14A     | green | 0.500  | 0.808  |
| TMEM182     | green | 0.801  | 0.574  |
| TMEM200C    | green | 0.860  | 0.855  |
| TMEM229B    | green | 0.707  | 0.881  |
| TMEM39A     | green | -0.765 | -0.842 |
| TNFAIP1     | green | 0.692  | 0.633  |
| TNFAIP8     | green | -0.397 | -0.608 |
| TNFRSF10B   | green | -0.729 | -0.883 |
| TNFRSF11A   | green | 0.750  | 0.887  |
| TNRC6A      | green | -0.729 | -0.886 |
| TOM1L1      | green | 0.835  | 0.811  |
| TOMM40L     | green | 0.820  | 0.958  |
| TOX3        | green | 0.685  | 0.441  |
| TPM3        | green | 0.725  | 0.776  |

|          |       |        |        |
|----------|-------|--------|--------|
| TRAF3    | green | 0.553  | 0.662  |
| TRERF1   | green | 0.774  | 0.826  |
| TREX2    | green | -0.573 | -0.492 |
| TRIM39   | green | -0.761 | -0.844 |
| TRIOBP   | green | -0.888 | -0.813 |
| TRIP13   | green | 0.845  | 0.696  |
| TSPAN17  | green | 0.760  | 0.834  |
| TSPO     | green | -0.746 | -0.826 |
| TTC18    | green | -0.581 | -0.837 |
| TTC23    | green | -0.919 | -0.711 |
| TTC9     | green | 0.875  | 0.937  |
| TTYH3    | green | 0.702  | 0.786  |
| TUB      | green | 0.888  | 0.906  |
| TUFT1    | green | 0.605  | 0.593  |
| UBA2     | green | 0.722  | 0.783  |
| UNC13A   | green | 0.842  | 0.980  |
| UNC79    | green | 0.802  | 0.878  |
| UPP2     | green | 0.752  | 0.328  |
| UQCC     | green | 0.638  | 0.910  |
| UXS1     | green | 0.732  | 0.883  |
| VASH2    | green | -0.816 | -0.763 |
| VIM      | green | -0.692 | -0.905 |
| VIT      | green | 0.836  | 0.857  |
| VOPP1    | green | 0.737  | 0.741  |
| VPS53    | green | 0.715  | 0.767  |
| VTI1B    | green | 0.813  | 0.831  |
| WDR82    | green | 0.854  | 0.939  |
| WDTC1    | green | 0.636  | 0.877  |
| WHSC1    | green | 0.843  | 0.871  |
| WISP2    | green | -0.689 | -0.870 |
| WNT2     | green | 0.939  | 0.901  |
| WNT7A    | green | 0.633  | 0.803  |
| WSB2     | green | 0.781  | 0.943  |
| WSCD2    | green | 0.776  | 0.959  |
| XRCC6BP1 | green | 0.555  | 0.412  |
| YLPM1    | green | 0.426  | 0.694  |
| YPEL1    | green | 0.596  | 0.418  |
| Z95152.1 | green | 0.850  | 0.906  |
| ZBTB49   | green | -0.659 | -0.533 |
| ZBTB7C   | green | 0.765  | 0.569  |
| ZC4H2    | green | 0.805  | 0.946  |
| ZDHHC23  | green | 0.708  | 0.905  |
| ZFR      | green | 0.847  | 0.606  |
| ZNF169   | green | 0.781  | 0.679  |
| ZNF17    | green | -0.632 | -0.559 |
| ZNF18    | green | -0.655 | -0.382 |
| ZNF193   | green | -0.809 | -0.604 |

|                |             |        |        |
|----------------|-------------|--------|--------|
| ZNF215         | green       | 0.704  | 0.373  |
| ZNF238         | green       | 0.878  | 0.946  |
| ZNF259         | green       | 0.654  | 0.875  |
| ZNF264         | green       | -0.668 | -0.790 |
| ZNF345         | green       | -0.663 | -0.919 |
| ZNF417         | green       | -0.641 | -0.197 |
| ZNF442         | green       | -0.732 | -0.842 |
| ZNF469         | green       | 0.689  | 0.662  |
| ZNF491         | green       | -0.774 | -0.680 |
| ZNF559         | green       | -0.595 | -0.670 |
| ZNF565         | green       | -0.607 | -0.514 |
| ZNF600         | green       | -0.704 | -0.640 |
| ZNF621         | green       | -0.813 | -0.805 |
| ZNF665         | green       | -0.703 | -0.602 |
| ZNF697         | green       | 0.598  | 0.861  |
| ZNF7           | green       | -0.729 | -0.808 |
| ZNF700         | green       | -0.829 | -0.606 |
| ZNF783         | green       | -0.613 | -0.832 |
| ZNF789         | green       | -0.727 | -0.912 |
| ZNF799         | green       | -0.839 | -0.574 |
| ZNF813         | green       | -0.491 | -0.595 |
| ZNF823         | green       | -0.696 | -0.610 |
| ZSCAN18        | green       | 0.587  | 0.728  |
| AP001625.4     | lightcyan   | 0.638  | 0.722  |
| BPHL           | lightcyan   | 0.625  | 0.545  |
| C10orf12       | lightcyan   | -0.543 | -0.616 |
| CCDC86         | lightcyan   | -0.470 | -0.675 |
| FPGT-TNNI3K    | lightcyan   | 0.833  | 0.533  |
| GNG8           | lightcyan   | 0.627  | 0.579  |
| SCARNA18       | lightcyan   | -0.478 | -0.940 |
| TPK1           | lightcyan   | 0.467  | 0.509  |
| AC018495.2     | lightyellow | 0.620  | 0.706  |
| ALG14          | lightyellow | 0.545  | 0.467  |
| ANP32B         | lightyellow | 0.600  | 0.614  |
| ATP8B5P        | lightyellow | 0.768  | 0.750  |
| C4BPB          | lightyellow | 0.499  | 0.758  |
| CCND2          | lightyellow | -0.700 | -0.547 |
| CSRP2          | lightyellow | 0.673  | 0.812  |
| FRG1B          | lightyellow | 0.467  | 0.871  |
| GTF2IRD2P1     | lightyellow | 0.479  | 0.500  |
| MYBPC3         | lightyellow | 0.467  | 0.516  |
| NOMO3          | lightyellow | -0.404 | -0.757 |
| OR2AE1         | lightyellow | 0.735  | 0.634  |
| RP11-12A1.1    | lightyellow | 0.769  | 0.395  |
| RP11-453E2.2   | lightyellow | -0.480 | -0.888 |
| RP11-783K16.14 | lightyellow | 0.607  | 0.616  |
| TRAK1          | lightyellow | -0.248 | -0.819 |

|              |               |        |        |
|--------------|---------------|--------|--------|
| USP51        | lightyellow   | 0.683  | 0.808  |
| VNN2         | lightyellow   | 0.614  | 0.655  |
| WNT2B        | lightyellow   | 0.333  | 0.524  |
| AC142528.1   | midnightblue  | -0.627 | -0.535 |
| AIG1         | midnightblue  | -0.682 | -0.902 |
| ARHGEF19     | midnightblue  | 0.798  | 0.811  |
| ATP8B2       | midnightblue  | 0.733  | 0.652  |
| BAIAP2L1     | midnightblue  | 0.582  | 0.635  |
| C11orf55     | midnightblue  | -0.523 | -0.356 |
| C2orf43      | midnightblue  | -0.427 | -0.648 |
| CASZ1        | midnightblue  | 0.639  | 0.632  |
| CCDC61       | midnightblue  | 0.668  | 0.599  |
| CNIH4        | midnightblue  | 0.711  | 0.805  |
| COL1A1       | midnightblue  | 0.653  | 0.504  |
| CTA-313A17.4 | midnightblue  | 0.468  | 0.739  |
| CYP39A1      | midnightblue  | -0.660 | -0.266 |
| DOK7         | midnightblue  | 0.677  | 0.579  |
| FAM70B       | midnightblue  | 0.607  | 0.624  |
| GS1-259H13.2 | midnightblue  | -0.467 | -0.562 |
| KIRREL       | midnightblue  | 0.510  | 0.754  |
| LAMA3        | midnightblue  | 0.510  | 0.535  |
| LAMA5        | midnightblue  | 0.778  | 0.613  |
| NDNL2        | midnightblue  | -0.634 | -0.454 |
| NUP85        | midnightblue  | 0.802  | 0.641  |
| PGLYRP1      | midnightblue  | 0.534  | 0.593  |
| SGCA         | midnightblue  | 0.567  | 0.492  |
| SLC25A21     | midnightblue  | -0.703 | -0.627 |
| ZFP106       | midnightblue  | -0.658 | -0.496 |
| ZNF587       | midnightblue  | 0.730  | 0.693  |
| ABI3         | paleturquoise | 0.914  | 0.766  |
| ACVR1        | paleturquoise | 0.576  | 0.769  |
| ADAP2        | paleturquoise | 0.638  | 0.898  |
| AOC2         | paleturquoise | -0.795 | -0.570 |
| AP000266.7   | paleturquoise | 0.425  | 0.715  |
| APOBR        | paleturquoise | 0.771  | 0.897  |
| B2M          | paleturquoise | 0.683  | 0.747  |
| BCL7A        | paleturquoise | -0.885 | -0.765 |
| BIN2         | paleturquoise | 0.917  | 0.794  |
| BLNK         | paleturquoise | 0.833  | 0.766  |
| BOLA3        | paleturquoise | -0.603 | -0.843 |
| BTK          | paleturquoise | 0.853  | 0.677  |
| C19orf38     | paleturquoise | 0.829  | 0.786  |
| C7orf63      | paleturquoise | -0.584 | -0.745 |
| C9orf167     | paleturquoise | 0.574  | 0.829  |
| CABP4        | paleturquoise | 0.777  | 0.617  |
| CD300A       | paleturquoise | 0.944  | 0.897  |
| CD4          | paleturquoise | 0.866  | 0.851  |

|          |               |        |        |
|----------|---------------|--------|--------|
| CD68     | paleturquoise | 0.960  | 0.950  |
| CIITA    | paleturquoise | 0.776  | 0.688  |
| CMTM7    | paleturquoise | 0.858  | 0.916  |
| CRTAM    | paleturquoise | -0.617 | -0.594 |
| CTSS     | paleturquoise | 0.872  | 0.809  |
| CXCL16   | paleturquoise | 0.857  | 0.911  |
| CYBA     | paleturquoise | 0.851  | 0.940  |
| CYTH4    | paleturquoise | 0.944  | 0.947  |
| DEF6     | paleturquoise | 0.829  | 0.929  |
| DISC1    | paleturquoise | 0.905  | 0.881  |
| DPY19L2  | paleturquoise | -0.690 | -0.735 |
| ELK1     | paleturquoise | -0.905 | -0.792 |
| EXOSC9   | paleturquoise | -0.714 | -0.721 |
| FAM177B  | paleturquoise | 0.755  | 0.706  |
| FBXL21   | paleturquoise | -0.693 | -0.799 |
| FLI1     | paleturquoise | 0.826  | 0.804  |
| GAB3     | paleturquoise | 0.894  | 0.870  |
| GIMAP1   | paleturquoise | 0.806  | 0.846  |
| GIMAP4   | paleturquoise | 0.675  | 0.834  |
| GIMAP6   | paleturquoise | 0.717  | 0.898  |
| GIMAP8   | paleturquoise | 0.691  | 0.860  |
| GPC2     | paleturquoise | 0.868  | 0.744  |
| GPR183   | paleturquoise | 0.847  | 0.925  |
| GPSM3    | paleturquoise | 0.930  | 0.902  |
| GRHL1    | paleturquoise | -0.485 | -0.774 |
| GYPC     | paleturquoise | 0.557  | 0.711  |
| HAVCR2   | paleturquoise | 0.942  | 0.820  |
| HCLS1    | paleturquoise | 0.921  | 0.933  |
| HHEX     | paleturquoise | 0.850  | 0.947  |
| HLA-DMA  | paleturquoise | 0.844  | 0.688  |
| HLA-DPB1 | paleturquoise | 0.774  | 0.858  |
| IGSF6    | paleturquoise | 0.923  | 0.884  |
| INPP5D   | paleturquoise | 0.954  | 0.945  |
| KCNJ8    | paleturquoise | 0.806  | 0.679  |
| KIAA0754 | paleturquoise | 0.891  | 0.815  |
| LAT2     | paleturquoise | 0.937  | 0.935  |
| LPAR6    | paleturquoise | 0.684  | 0.878  |
| MAN2B1   | paleturquoise | 0.736  | 0.879  |
| MYO1F    | paleturquoise | 0.696  | 0.973  |
| NFAM1    | paleturquoise | 0.850  | 0.865  |
| NFATC2   | paleturquoise | 0.721  | 0.774  |
| PIK3AP1  | paleturquoise | 0.828  | 0.800  |
| PLCG2    | paleturquoise | 0.859  | 0.763  |
| PRKACA   | paleturquoise | -0.797 | -0.640 |
| PTPN6    | paleturquoise | 0.909  | 0.956  |
| PYCARD   | paleturquoise | 0.714  | 0.753  |
| RBM3     | paleturquoise | 0.693  | 0.635  |

|               |               |        |        |
|---------------|---------------|--------|--------|
| RP11-834C11.4 | paleturquoise | 0.967  | 0.759  |
| RP11-98I9.4   | paleturquoise | 0.647  | 0.648  |
| S100A11       | paleturquoise | 0.643  | 0.718  |
| SLA           | paleturquoise | 0.684  | 0.824  |
| SLC37A2       | paleturquoise | 0.694  | 0.785  |
| SLC7A7        | paleturquoise | 0.669  | 0.835  |
| SLCO2B1       | paleturquoise | 0.897  | 0.807  |
| TBXAS1        | paleturquoise | 0.945  | 0.955  |
| TEKT1         | paleturquoise | -0.582 | -0.583 |
| TGFB1         | paleturquoise | 0.933  | 0.858  |
| TGFBR2        | paleturquoise | 0.735  | 0.821  |
| TLR6          | paleturquoise | 0.792  | 0.831  |
| TMEM106A      | paleturquoise | 0.888  | 0.890  |
| TMIGD2        | paleturquoise | 0.715  | 0.831  |
| TNFAIP8L2     | paleturquoise | 0.751  | 0.914  |
| TOX2          | paleturquoise | -0.574 | -0.626 |
| TRIM38        | paleturquoise | 0.890  | 0.892  |
| UCP2          | paleturquoise | 0.762  | 0.928  |
| VAMP8         | paleturquoise | 0.750  | 0.636  |
| WAS           | paleturquoise | 0.784  | 0.921  |
| WDR19         | paleturquoise | -0.472 | -0.649 |
| WNT9B         | paleturquoise | -0.757 | -0.729 |
| ZCCHC18       | paleturquoise | -0.744 | -0.803 |
| ZMYND15       | paleturquoise | 0.732  | 0.895  |
| ABHD3         | purple        | 0.749  | 0.883  |
| AC004017.1    | purple        | 0.849  | 0.946  |
| AC004967.7    | purple        | 0.865  | 0.958  |
| AC005740.5    | purple        | 0.749  | 0.808  |
| AC007000.12   | purple        | 0.878  | 0.694  |
| AC009501.4    | purple        | 0.814  | 0.946  |
| AC068831.8    | purple        | 0.472  | 0.870  |
| AC092620.2    | purple        | 0.683  | 0.929  |
| AC093690.1    | purple        | 0.624  | 0.799  |
| AC093726.6    | purple        | 0.804  | 0.935  |
| ACACA         | purple        | -0.870 | -0.940 |
| ACADM         | purple        | 0.806  | 0.651  |
| ACLY          | purple        | -0.927 | -0.923 |
| ACTN2         | purple        | -0.702 | -0.809 |
| ADAT1         | purple        | -0.801 | -0.911 |
| ADCY5         | purple        | -0.779 | -0.921 |
| AK4           | purple        | 0.805  | 0.778  |
| ALDH1A1       | purple        | 0.830  | 0.542  |
| ANKH          | purple        | -0.749 | -0.936 |
| AP000487.5    | purple        | 0.701  | 0.947  |
| APBA1         | purple        | -0.764 | -0.979 |
| AQP11         | purple        | -0.669 | -0.760 |
| ARHGAP5-AS1   | purple        | 0.742  | 0.859  |



|                |        |        |        |
|----------------|--------|--------|--------|
| ARMC8          | purple | -0.971 | -0.813 |
| ARPC4          | purple | 0.702  | 0.555  |
| ARR3           | purple | 0.427  | 0.430  |
| ASB1           | purple | -0.744 | -0.782 |
| ASB3           | purple | 0.773  | 0.556  |
| ASRGL1         | purple | 0.904  | 0.952  |
| ATP13A5        | purple | 0.840  | 0.753  |
| ATP2A2         | purple | -0.832 | -0.972 |
| B3GALTL        | purple | -0.675 | -0.672 |
| BAZ1B          | purple | 0.565  | 0.762  |
| BCAS4          | purple | -0.601 | -0.855 |
| BECN1          | purple | -0.918 | -0.951 |
| BRD7P3         | purple | 0.714  | 0.664  |
| BUB3           | purple | -0.523 | -0.713 |
| C11orf70       | purple | 0.525  | 0.863  |
| C12orf33       | purple | 0.573  | 0.684  |
| C14orf64       | purple | 0.767  | 0.604  |
| C15orf38-AP3S2 | purple | 0.656  | 0.807  |
| C15orf40       | purple | 0.742  | 0.870  |
| C1orf106       | purple | 0.662  | 0.432  |
| C1orf131       | purple | 0.932  | 0.900  |
| C1orf162       | purple | 0.802  | 0.870  |
| C1orf229       | purple | 0.651  | 0.762  |
| C3orf19        | purple | 0.772  | 0.856  |
| C7orf10        | purple | 0.859  | 0.863  |
| C7orf41        | purple | -0.673 | -0.443 |
| C8orf44        | purple | 0.785  | 0.881  |
| C8orf76        | purple | 0.761  | 0.598  |
| C9orf129       | purple | -0.826 | -0.866 |
| C9orf37        | purple | 0.434  | 0.667  |
| CAB39L         | purple | -0.774 | -0.916 |
| CAMTA1         | purple | -0.824 | -0.864 |
| CBY1           | purple | 0.810  | 0.934  |
| CCDC144A       | purple | 0.842  | 0.544  |
| CCDC64B        | purple | -0.547 | -0.540 |
| CCDC85A        | purple | -0.732 | -0.871 |
| CCDC87         | purple | -0.570 | -0.718 |
| CCT6P3         | purple | 0.503  | 0.853  |
| CDHR3          | purple | 0.626  | 0.795  |
| CDR1           | purple | -0.750 | -0.130 |
| CGNL1          | purple | 0.717  | 0.805  |
| CGRRF1         | purple | 0.571  | 0.629  |
| CHRD1          | purple | 0.691  | 0.711  |
| CHRN1          | purple | 0.770  | 0.700  |
| CHST10         | purple | 0.440  | 0.725  |
| CHST5          | purple | 0.787  | 0.794  |
| CLCN6          | purple | -0.855 | -0.929 |

|               |        |        |        |
|---------------|--------|--------|--------|
| CLIP2         | purple | -0.808 | -0.805 |
| CLRN1-AS1     | purple | 0.899  | 0.635  |
| CORO1C        | purple | -0.886 | -0.916 |
| COTL1         | purple | 0.767  | 0.854  |
| CREB1         | purple | -0.523 | -0.418 |
| CSMD1         | purple | -0.684 | -0.851 |
| CSNK2A1P      | purple | -0.826 | -0.865 |
| CSTB          | purple | 0.586  | 0.675  |
| CTC-308K20.1  | purple | 0.828  | 0.652  |
| CTD-2003C8.1  | purple | 0.778  | 0.531  |
| CTD-2140G10.2 | purple | 0.554  | 0.561  |
| CTD-2260A17.2 | purple | -0.629 | -0.852 |
| CTD-2292P10.4 | purple | -0.587 | -0.662 |
| CTD-2555K7.2  | purple | 0.592  | 0.705  |
| CTD-3074O7.5  | purple | -0.796 | -0.686 |
| CTH           | purple | 0.724  | 0.674  |
| CTNNB1        | purple | -0.814 | -0.546 |
| CWC25         | purple | 0.720  | 0.884  |
| CXorf1        | purple | 0.821  | 0.576  |
| CYP20A1       | purple | 0.683  | 0.852  |
| DAK           | purple | -0.705 | -0.813 |
| DARS          | purple | 0.849  | 0.928  |
| DCAF5         | purple | 0.655  | 0.819  |
| DCLRE1C       | purple | 0.839  | 0.958  |
| DECR1         | purple | 0.931  | 0.887  |
| DFFA          | purple | 0.799  | 0.665  |
| DIAPH3        | purple | 0.632  | 0.327  |
| DIO2          | purple | 0.838  | 0.897  |
| DKK3          | purple | -0.892 | -0.825 |
| DMGDH         | purple | 0.896  | 0.426  |
| DNAH7         | purple | 0.645  | 0.769  |
| DNAJC1        | purple | 0.818  | 0.854  |
| DOC2B         | purple | -0.772 | -0.775 |
| DONSON        | purple | 0.807  | 0.609  |
| DRD5          | purple | -0.663 | -0.790 |
| DTD1          | purple | -0.661 | -0.688 |
| DTX4          | purple | -0.847 | -0.860 |
| DUSP22        | purple | -0.732 | -0.909 |
| DYRK4         | purple | 0.666  | 0.767  |
| E2F5          | purple | 0.806  | 0.499  |
| EARS2         | purple | -0.847 | -0.904 |
| EEF1B2        | purple | -0.600 | -0.654 |
| EFHD2         | purple | -0.771 | -0.618 |
| EFNA4         | purple | 0.727  | 0.672  |
| EIF3A         | purple | 0.527  | 0.811  |
| EMX2          | purple | 0.932  | 0.943  |
| ENKUR         | purple | 0.827  | 0.701  |

|              |        |        |        |
|--------------|--------|--------|--------|
| ENOPH1       | purple | -0.719 | -0.752 |
| ENTPD3       | purple | -0.658 | -0.900 |
| ENTPD3-AS1   | purple | 0.776  | 0.740  |
| EPHA3        | purple | -0.860 | -0.853 |
| ETFDH        | purple | 0.871  | 0.881  |
| F13A1        | purple | -0.862 | -0.789 |
| FAM107A      | purple | 0.865  | 0.933  |
| FAM110D      | purple | 0.806  | 0.497  |
| FAM113B      | purple | -0.665 | -0.506 |
| FAM117A      | purple | 0.555  | 0.670  |
| FAM118B      | purple | 0.801  | 0.737  |
| FAM131B      | purple | -0.948 | -0.970 |
| FAM184A      | purple | 0.786  | 0.900  |
| FAM186A      | purple | 0.803  | 0.831  |
| FAM18B1      | purple | 0.733  | 0.822  |
| FAM45B       | purple | -0.629 | -0.840 |
| FAM89A       | purple | 0.801  | 0.901  |
| FAS          | purple | 0.454  | 0.653  |
| FBLN5        | purple | -0.875 | -0.518 |
| FBXW2        | purple | -0.927 | -0.782 |
| FGD6         | purple | 0.560  | 0.869  |
| FJX1         | purple | 0.587  | 0.752  |
| FOXO3B       | purple | -0.798 | -0.629 |
| FOXP2        | purple | -0.754 | -0.788 |
| FSD2         | purple | 0.869  | 0.842  |
| FXD3         | purple | 0.848  | 0.866  |
| FYN          | purple | 0.893  | 0.823  |
| GABPB2       | purple | 0.737  | 0.777  |
| GCNT1        | purple | -0.691 | -0.803 |
| GCSH         | purple | 0.745  | 0.726  |
| GIGYF2       | purple | 0.665  | 0.809  |
| GINS2        | purple | 0.746  | 0.570  |
| GMNN         | purple | 0.898  | 0.854  |
| GNE          | purple | -0.771 | -0.607 |
| GNG5         | purple | 0.895  | 0.927  |
| GNRHR2       | purple | -0.957 | -0.919 |
| GPANK1       | purple | 0.629  | 0.502  |
| GPATCH1      | purple | 0.782  | 0.573  |
| GPHN         | purple | -0.647 | -0.837 |
| GPR176       | purple | -0.725 | -0.837 |
| GPR85        | purple | -0.532 | -0.888 |
| GRIP1        | purple | -0.399 | -0.782 |
| GRM1         | purple | -0.698 | -0.920 |
| GRM5-AS1     | purple | 0.565  | 0.848  |
| GS1-124K5.12 | purple | -0.583 | -0.332 |
| H3F3A        | purple | 0.604  | 0.562  |
| HERC1        | purple | -0.939 | -0.942 |

|             |        |        |        |
|-------------|--------|--------|--------|
| HFM1        | purple | 0.594  | 0.729  |
| HIF1AN      | purple | -0.844 | -0.971 |
| HMGCR       | purple | -0.846 | -0.887 |
| HMGN3       | purple | 0.775  | 0.898  |
| HMGXB4      | purple | 0.738  | 0.821  |
| HPSE2       | purple | 0.838  | 0.647  |
| HRSP12      | purple | 0.915  | 0.873  |
| HS3ST2      | purple | -0.651 | -0.791 |
| HS3ST3A1    | purple | 0.886  | 0.945  |
| HSPA8       | purple | -0.901 | -0.938 |
| HTT-AS1     | purple | 0.614  | 0.757  |
| IARS        | purple | -0.780 | -0.921 |
| IER3        | purple | 0.251  | 0.614  |
| IL12RB2     | purple | -0.643 | -0.900 |
| INPP4A      | purple | -0.893 | -0.972 |
| IQCA1       | purple | 0.808  | 0.813  |
| IQSEC1      | purple | -0.851 | -0.971 |
| ISPD        | purple | -0.669 | -0.805 |
| ITM2A       | purple | -0.717 | -0.545 |
| ITPR2       | purple | 0.857  | 0.897  |
| KCNJ12      | purple | -0.854 | -0.927 |
| KCNJ16      | purple | 0.830  | 0.839  |
| KCNMB3      | purple | 0.863  | 0.755  |
| KCTD6       | purple | 0.609  | 0.619  |
| KIAA0090    | purple | -0.790 | -0.829 |
| KIAA1199    | purple | -0.846 | -0.936 |
| KLHL12      | purple | -0.958 | -0.947 |
| KRT31       | purple | -0.700 | -0.473 |
| LAPTM4B     | purple | -0.848 | -0.699 |
| LARGE       | purple | -0.869 | -0.924 |
| LDOC1L      | purple | -0.837 | -0.893 |
| LGALS3      | purple | 0.877  | 0.954  |
| LGMN        | purple | -0.805 | -0.918 |
| LINC00343   | purple | -0.610 | -0.593 |
| LMNB1       | purple | 0.702  | 0.820  |
| LRP11       | purple | -0.899 | -0.860 |
| LRRC47      | purple | -0.865 | -0.817 |
| LRRC55      | purple | -0.767 | -0.944 |
| LRRFIP1P1   | purple | 0.671  | 0.750  |
| LSAMP-AS3   | purple | 0.720  | 0.834  |
| LUC7L       | purple | 0.765  | 0.928  |
| LURAP1L     | purple | -0.554 | -0.806 |
| MACROD2-AS1 | purple | 0.560  | 0.424  |
| MAGED2      | purple | -0.769 | -0.804 |
| MAGOH       | purple | 0.674  | 0.705  |
| MAP3K5      | purple | 0.745  | 0.789  |
| MAP4K2      | purple | -0.930 | -0.892 |

|          |        |        |        |
|----------|--------|--------|--------|
| MARCH2-1 | purple | 0.728  | 0.468  |
| MARK3    | purple | 0.660  | 0.893  |
| MATN1    | purple | -0.625 | -0.509 |
| ME1      | purple | 0.346  | 0.586  |
| MEIS2    | purple | 0.737  | 0.834  |
| MEMO1    | purple | -0.710 | -0.416 |
| METTL12  | purple | 0.253  | 0.722  |
| MFAP1    | purple | 0.504  | 0.685  |
| MFI2-AS1 | purple | 0.515  | 0.787  |
| MGAT4C   | purple | 0.612  | 0.850  |
| MIR155HG | purple | 0.657  | 0.576  |
| MIR29C   | purple | 0.655  | 0.844  |
| MKX      | purple | -0.845 | -0.777 |
| MNT      | purple | -0.787 | -0.751 |
| MOSPD3   | purple | 0.784  | 0.756  |
| MRPL48   | purple | -0.588 | -0.598 |
| MRPL53   | purple | 0.859  | 0.712  |
| MTMR4    | purple | -0.843 | -0.931 |
| MTRNR2L4 | purple | 0.691  | 0.499  |
| MXRA5    | purple | -0.847 | -0.561 |
| MYRIP    | purple | -0.937 | -0.926 |
| NADKD1   | purple | 0.667  | 0.767  |
| NANOS1   | purple | 0.780  | 0.464  |
| NBAS     | purple | -0.841 | -0.799 |
| NCAPG2   | purple | -0.507 | -0.613 |
| NEK4     | purple | 0.533  | 0.602  |
| NIF3L1   | purple | -0.808 | -0.880 |
| NNT      | purple | -0.894 | -0.887 |
| NOTCH2NL | purple | 0.895  | 0.826  |
| NPEPL1   | purple | 0.801  | 0.856  |
| NPTX1    | purple | -0.826 | -0.954 |
| NRARP    | purple | 0.653  | 0.453  |
| NRG1     | purple | -0.815 | -0.952 |
| NSRP1    | purple | 0.613  | 0.869  |
| NTN4     | purple | -0.914 | -0.769 |
| NUP93    | purple | -0.672 | -0.924 |
| ODZ4     | purple | -0.841 | -0.925 |
| OPHN1    | purple | 0.669  | 0.845  |
| OR2H2    | purple | 0.758  | 0.803  |
| OSBPL10  | purple | -0.915 | -0.952 |
| PARD3    | purple | 0.873  | 0.962  |
| PCDH11X  | purple | -0.626 | -0.538 |
| PCDHA5   | purple | -0.747 | -0.935 |
| PEBP4    | purple | 0.620  | 0.436  |
| PFKM     | purple | -0.665 | -0.726 |
| PINX1    | purple | 0.684  | 0.664  |
| PIR      | purple | 0.434  | 0.813  |

|           |        |        |        |
|-----------|--------|--------|--------|
| PITRM1    | purple | -0.863 | -0.819 |
| PKD1L3    | purple | 0.821  | 0.697  |
| PKLR      | purple | -0.582 | -0.735 |
| PLAC8L1   | purple | 0.432  | 0.880  |
| PLBD2     | purple | -0.758 | -0.922 |
| PLEKHB2   | purple | -0.774 | -0.913 |
| PMCHL1    | purple | 0.714  | 0.800  |
| PNN       | purple | 0.568  | 0.919  |
| POLH      | purple | 0.936  | 0.637  |
| POLR3C    | purple | -0.888 | -0.883 |
| PON1      | purple | 0.786  | 0.908  |
| POP4      | purple | -0.812 | -0.777 |
| PPAPDC1B  | purple | 0.713  | 0.810  |
| PPP1R14B  | purple | 0.785  | 0.792  |
| PPP1R18   | purple | 0.759  | 0.721  |
| PPP1R3C   | purple | 0.889  | 0.939  |
| PPP1R3E   | purple | 0.573  | 0.655  |
| PPP1R3G   | purple | 0.834  | 0.647  |
| PRDX1     | purple | 0.710  | 0.447  |
| PROCR     | purple | -0.669 | -0.322 |
| PROP1     | purple | 0.683  | 0.727  |
| PROX1-AS1 | purple | -0.574 | -0.723 |
| PRPS1     | purple | -0.756 | -0.958 |
| PRR14     | purple | 0.787  | 0.902  |
| PRR3      | purple | 0.512  | 0.588  |
| PRR5      | purple | 0.682  | 0.738  |
| PSMD9     | purple | 0.802  | 0.740  |
| PSME2     | purple | 0.685  | 0.878  |
| PTN       | purple | 0.817  | 0.814  |
| PTPRK     | purple | -0.891 | -0.908 |
| PTPRM     | purple | -0.829 | -0.833 |
| PTPRN     | purple | -0.884 | -0.953 |
| PURG      | purple | 0.715  | 0.675  |
| PWP1      | purple | -0.788 | -0.850 |
| PXMP2     | purple | 0.624  | 0.866  |
| PZP       | purple | 0.505  | 0.865  |
| QSOX1     | purple | -0.798 | -0.858 |
| RAB31     | purple | 0.951  | 0.969  |
| RAVER2    | purple | 0.709  | 0.788  |
| REGG      | purple | 0.788  | 0.735  |
| RFPL3-AS1 | purple | 0.588  | 0.626  |
| RFXANK    | purple | 0.858  | 0.875  |
| RGS20     | purple | 0.914  | 0.936  |
| RGS22     | purple | 0.544  | 0.789  |
| RNF111    | purple | -0.813 | -0.895 |
| RNF121    | purple | -0.893 | -0.836 |
| RNF182    | purple | 0.811  | 0.873  |

|                |        |        |        |
|----------------|--------|--------|--------|
| RNF41          | purple | -0.954 | -0.966 |
| RNLS           | purple | -0.910 | -0.761 |
| RP11-1018J11.1 | purple | -0.623 | -0.790 |
| RP11-109I13.2  | purple | 0.673  | 0.837  |
| RP11-10K16.1   | purple | 0.747  | 0.693  |
| RP11-124D2.6   | purple | 0.544  | 0.314  |
| RP11-12A2.3    | purple | 0.776  | 0.651  |
| RP11-159F24.1  | purple | 0.846  | 0.927  |
| RP11-159F24.3  | purple | -0.575 | -0.763 |
| RP11-179H18.2  | purple | 0.965  | 0.812  |
| RP11-215A19.1  | purple | 0.915  | 0.838  |
| RP11-288I21.1  | purple | 0.614  | 0.823  |
| RP11-367H5.7   | purple | 0.388  | 0.910  |
| RP11-392A22.2  | purple | 0.910  | 0.807  |
| RP11-3D4.3     | purple | 0.841  | 0.886  |
| RP11-428C6.1   | purple | -0.942 | -0.811 |
| RP11-429B14.2  | purple | 0.762  | 0.480  |
| RP11-480I12.4  | purple | 0.820  | 0.524  |
| RP11-493K19.3  | purple | 0.702  | 0.769  |
| RP11-545I5.3   | purple | -0.719 | -0.783 |
| RP11-56B16.5   | purple | 0.885  | 0.631  |
| RP11-574K11.16 | purple | 0.669  | 0.667  |
| RP11-612B6.2   | purple | 0.832  | 0.918  |
| RP11-625H11.1  | purple | 0.654  | 0.713  |
| RP11-6F2.7     | purple | 0.633  | 0.659  |
| RP11-737F9.1   | purple | 0.727  | 0.836  |
| RP11-80H5.7    | purple | 0.485  | 0.469  |
| RP11-85O21.5   | purple | 0.920  | 0.727  |
| RP11-91P24.6   | purple | 0.713  | 0.643  |
| RP11-91P24.7   | purple | 0.862  | 0.746  |
| RP1-1J6.2      | purple | 0.789  | 0.913  |
| RP3-449O17.1   | purple | 0.609  | 0.882  |
| RP4-671G15.3   | purple | 0.748  | 0.867  |
| RP4-791M13.5   | purple | 0.769  | 0.506  |
| RP5-1027G4.3   | purple | 0.698  | 0.625  |
| RP5-1198E17.1  | purple | 0.618  | 0.191  |
| RP5-914P20.5   | purple | 0.500  | 0.643  |
| RPL36A         | purple | 0.896  | 0.802  |
| RPP21          | purple | 0.907  | 0.849  |
| RPS7           | purple | 0.580  | 0.719  |
| RPUSD4         | purple | -0.858 | -0.976 |
| SBF1           | purple | -0.741 | -0.911 |
| SEC14L1        | purple | 0.710  | 0.563  |
| SEC16B         | purple | -0.499 | -0.836 |
| SELV           | purple | 0.770  | 0.665  |
| SERPINE2       | purple | 0.791  | 0.776  |
| SETD5          | purple | 0.455  | 0.928  |

|              |        |        |        |
|--------------|--------|--------|--------|
| SGK196       | purple | -0.774 | -0.834 |
| SGPP2        | purple | -0.826 | -0.547 |
| SLC1A1       | purple | -0.602 | -0.967 |
| SLC25A30     | purple | 0.896  | 0.813  |
| SLC25A33     | purple | 0.894  | 0.764  |
| SLC6A17      | purple | -0.915 | -0.963 |
| SLIT2        | purple | -0.779 | -0.900 |
| SLIT3        | purple | -0.858 | -0.978 |
| SNRNP35      | purple | 0.814  | 0.830  |
| SORCS1       | purple | -0.910 | -0.742 |
| SORCS3       | purple | -0.810 | -0.938 |
| SPATA18      | purple | -0.673 | -0.480 |
| SPATA2       | purple | -0.471 | -0.841 |
| SPOCK2       | purple | -0.836 | -0.889 |
| SRI          | purple | 0.867  | 0.938  |
| SS18L1       | purple | -0.870 | -0.842 |
| SSH1         | purple | -0.730 | -0.778 |
| ST7-AS2      | purple | 0.770  | 0.901  |
| STEAP1B      | purple | -0.559 | -0.766 |
| STK19        | purple | 0.600  | 0.667  |
| SUCLG2       | purple | 0.913  | 0.854  |
| SUSD1        | purple | -0.801 | -0.931 |
| SYCP3        | purple | 0.961  | 0.971  |
| SYNPR        | purple | -0.718 | -0.830 |
| TAF3         | purple | 0.848  | 0.709  |
| TEX15        | purple | 0.776  | 0.853  |
| TIPIN        | purple | 0.796  | 0.708  |
| TLN2         | purple | -0.829 | -0.970 |
| TMCC2        | purple | -0.696 | -0.745 |
| TMCO7        | purple | -0.902 | -0.765 |
| TMEM185A     | purple | -0.613 | -0.674 |
| TMEM220      | purple | 0.625  | 0.867  |
| TMPRSS11A    | purple | 0.830  | 0.865  |
| TNFAIP8L3    | purple | -0.842 | -0.783 |
| TNFRSF21     | purple | -0.839 | -0.948 |
| TNRC6B       | purple | 0.852  | 0.653  |
| TNS3         | purple | 0.881  | 0.724  |
| TP53I3       | purple | 0.845  | 0.795  |
| TRAF3IP2     | purple | 0.889  | 0.934  |
| TRAF3IP2-AS1 | purple | 0.847  | 0.880  |
| TRIM32       | purple | -0.843 | -0.966 |
| TRIM35       | purple | -0.690 | -0.809 |
| TRIM4        | purple | 0.873  | 0.931  |
| TRIP4        | purple | 0.604  | 0.673  |
| TRPC5-AS1    | purple | 0.929  | 0.842  |
| TSPAN12      | purple | 0.838  | 0.752  |
| TSPYL4       | purple | -0.840 | -0.973 |



|             |        |        |        |
|-------------|--------|--------|--------|
| TUBGCP2     | purple | -0.916 | -0.776 |
| TUBGCP5     | purple | -0.564 | -0.736 |
| UBE2J2      | purple | 0.548  | 0.689  |
| UBR4        | purple | -0.803 | -0.627 |
| USP28       | purple | 0.639  | 0.278  |
| VAV3        | purple | 0.598  | 0.645  |
| VKORC1      | purple | 0.913  | 0.709  |
| VSIG10      | purple | 0.921  | 0.837  |
| WBSCR22     | purple | 0.890  | 0.563  |
| WDR33       | purple | 0.681  | 0.415  |
| YBX1        | purple | 0.820  | 0.703  |
| ZBTB43      | purple | 0.926  | 0.877  |
| ZCCHC11     | purple | 0.798  | 0.948  |
| ZCCHC7      | purple | 0.883  | 0.861  |
| ZCCHC8      | purple | 0.945  | 0.785  |
| ZDHC22      | purple | -0.810 | -0.875 |
| ZFP41       | purple | -0.859 | -0.859 |
| ZFPM2       | purple | -0.729 | -0.830 |
| ZFYVE9      | purple | -0.911 | -0.975 |
| ZNF20       | purple | 0.836  | 0.687  |
| ZNF385A     | purple | 0.880  | 0.846  |
| ZNF394      | purple | 0.668  | 0.617  |
| ZNF407      | purple | -0.940 | -0.821 |
| ZNF410      | purple | 0.947  | 0.937  |
| ZNF566      | purple | 0.702  | 0.821  |
| ZNF576      | purple | -0.532 | -0.557 |
| ZNF680      | purple | 0.784  | 0.837  |
| ZNF703      | purple | 0.829  | 0.773  |
| ZNF709      | purple | 0.943  | 0.554  |
| ZNF830      | purple | 0.558  | 0.667  |
| ZSWIM7      | purple | 0.837  | 0.939  |
| AACS        | red    | 0.883  | 0.778  |
| AAMP        | red    | 0.898  | 0.589  |
| AARS        | red    | 0.993  | 0.912  |
| AARS2       | red    | 0.839  | 0.885  |
| ABCA3       | red    | 0.942  | 0.966  |
| ABCC10      | red    | 0.897  | 0.600  |
| ABCC5       | red    | 0.811  | 0.737  |
| ABCF2       | red    | 0.983  | 0.866  |
| ABCF3       | red    | 0.941  | 0.954  |
| ABTB1       | red    | 0.931  | 0.882  |
| AC002117.1  | red    | -0.519 | -0.630 |
| AC006547.14 | red    | 0.732  | 0.763  |
| AC007390.6  | red    | -0.862 | -0.784 |
| AC018642.1  | red    | -0.541 | -0.710 |
| AC073869.20 | red    | 0.946  | 0.883  |
| AC079807.2  | red    | -0.708 | -0.558 |

|             |     |        |        |
|-------------|-----|--------|--------|
| AC109333.10 | red | -0.897 | -0.728 |
| AC110619.2  | red | 0.783  | 0.746  |
| AC137723.5  | red | 0.813  | 0.476  |
| ACAD8       | red | 0.761  | 0.790  |
| ACAD9       | red | 0.788  | 0.863  |
| ACE         | red | 0.978  | 0.835  |
| ACHE        | red | 0.543  | 0.688  |
| ACO2        | red | 0.935  | 0.778  |
| ACOT7       | red | 0.972  | 0.921  |
| ACTR1A      | red | 0.881  | 0.931  |
| ACTR1B      | red | 0.923  | 0.967  |
| ADAM11      | red | 0.955  | 0.966  |
| ADAMTS8     | red | 0.855  | 0.834  |
| ADC         | red | 0.809  | 0.886  |
| ADCK2       | red | 0.831  | 0.852  |
| ADCY9       | red | 0.832  | 0.703  |
| ADSL        | red | 0.907  | 0.773  |
| AFAP1L2     | red | 0.743  | 0.779  |
| AFP         | red | 0.556  | 0.549  |
| AGBL3       | red | -0.463 | -0.726 |
| AGPAT6      | red | 0.796  | 0.323  |
| AGRN        | red | 0.878  | 0.915  |
| AHCY        | red | 0.905  | 0.878  |
| AHDC1       | red | 0.512  | 0.579  |
| AHSA1       | red | 0.701  | 0.691  |
| AK3         | red | -0.926 | -0.934 |
| AKR1B1      | red | 0.881  | 0.867  |
| ALDH1B1     | red | 0.501  | 0.505  |
| ALDOA       | red | 0.971  | 0.946  |
| ALS2CR11    | red | -0.841 | -0.611 |
| AMDHD2      | red | 0.894  | 0.836  |
| AMMECR1     | red | -0.620 | -0.863 |
| AMPD2       | red | 0.915  | 0.921  |
| ANAPC10     | red | -0.490 | -0.616 |
| ANGPT4      | red | 0.820  | 0.475  |
| ANK1        | red | 0.490  | 0.747  |
| ANKHD1      | red | -0.818 | -0.958 |
| AP001610.5  | red | -0.383 | -0.762 |
| AP1M1       | red | 0.905  | 0.889  |
| AP2A1       | red | 0.978  | 0.947  |
| AP2A2       | red | 0.982  | 0.945  |
| AP3B1       | red | -0.855 | -0.832 |
| AP3B2       | red | 0.956  | 0.940  |
| APEH        | red | 0.990  | 0.919  |
| APLP2       | red | 0.879  | 0.838  |
| APP         | red | 0.762  | 0.913  |
| ARFGAP1     | red | 0.854  | 0.697  |

|               |     |        |        |
|---------------|-----|--------|--------|
| ARHGAP9       | red | 0.500  | 0.381  |
| ARHGEF17      | red | 0.927  | 0.855  |
| ARHGEF26-AS1  | red | -0.750 | -0.855 |
| ARID5B        | red | -0.883 | -0.697 |
| ARL13B        | red | -0.788 | -0.940 |
| ARL6IP6       | red | -0.871 | -0.854 |
| ARMC6         | red | 0.956  | 0.744  |
| ARMCX4        | red | 0.796  | 0.650  |
| ASB13         | red | 0.541  | 0.870  |
| ASB6          | red | 0.762  | 0.711  |
| ASNA1         | red | 0.951  | 0.910  |
| ATG4B         | red | 0.889  | 0.575  |
| ATG9A         | red | 0.903  | 0.974  |
| ATP13A2       | red | 0.951  | 0.958  |
| ATP1A1        | red | 0.865  | 0.897  |
| ATP2B3        | red | 0.802  | 0.918  |
| ATP6V0D1      | red | 0.919  | 0.934  |
| B3GALT4       | red | 0.706  | 0.742  |
| B3GAT1        | red | 0.684  | 0.790  |
| B3GNT1        | red | 0.807  | 0.789  |
| B3GNT5        | red | -0.605 | -0.720 |
| B4GALNT3      | red | 0.861  | 0.812  |
| BAI2          | red | 0.837  | 0.937  |
| BAIAP3        | red | 0.823  | 0.796  |
| BCAP31        | red | 0.895  | 0.703  |
| BCAR1         | red | 0.640  | 0.729  |
| BCS1L         | red | 0.866  | 0.706  |
| BLM           | red | -0.669 | -0.463 |
| BMP8A         | red | 0.531  | 0.330  |
| BMPER         | red | 0.909  | 0.898  |
| BRF1          | red | 0.797  | 0.649  |
| BYSL          | red | 0.882  | 0.424  |
| C10orf35      | red | 0.926  | 0.932  |
| C11orf10      | red | -0.667 | -0.305 |
| C11orf71      | red | -0.787 | -0.574 |
| C12orf44      | red | 0.926  | 0.920  |
| C12orf56      | red | -0.754 | -0.579 |
| C14orf109     | red | -0.855 | -0.661 |
| C15orf33      | red | -0.947 | -0.806 |
| C15orf58      | red | 0.794  | 0.669  |
| C16orf91      | red | 0.874  | 0.777  |
| C17orf70      | red | 0.772  | 0.671  |
| C19orf47      | red | 0.701  | 0.706  |
| C1orf112      | red | -0.484 | -0.322 |
| C1orf27       | red | -0.912 | -0.918 |
| C20orf166-AS1 | red | 0.485  | 0.521  |
| C21orf2       | red | 0.927  | 0.869  |

|          |     |        |        |
|----------|-----|--------|--------|
| C21orf67 | red | 0.911  | 0.789  |
| C3orf18  | red | 0.933  | 0.815  |
| C3orf37  | red | 0.787  | 0.692  |
| C3orf39  | red | 0.934  | 0.921  |
| C4BPA    | red | -0.859 | -0.738 |
| C4orf22  | red | -0.401 | -0.428 |
| C4orf29  | red | -0.870 | -0.780 |
| C5orf43  | red | -0.883 | -0.683 |
| C5orf63  | red | -0.705 | -0.884 |
| C6orf225 | red | -0.667 | -0.495 |
| C7orf43  | red | 0.907  | 0.911  |
| C7orf73  | red | -0.614 | -0.823 |
| C8orf37  | red | -0.889 | -0.528 |
| CABIN1   | red | 0.841  | 0.884  |
| CACNA1B  | red | 0.939  | 0.922  |
| CACNA1I  | red | 0.932  | 0.912  |
| CALHM1   | red | 0.890  | 0.900  |
| CAND2    | red | 0.929  | 0.920  |
| CAPN1    | red | 0.945  | 0.881  |
| CARKD    | red | 0.721  | 0.381  |
| CASKIN1  | red | 0.975  | 0.961  |
| CC2D2B   | red | -0.660 | -0.742 |
| CCDC115  | red | 0.691  | 0.870  |
| CCDC121  | red | -0.886 | -0.295 |
| CCDC160  | red | -0.663 | -0.687 |
| CCDC22   | red | 0.926  | 0.726  |
| CCDC51   | red | 0.885  | 0.884  |
| CCDC81   | red | -0.604 | -0.600 |
| CCDC88A  | red | -0.837 | -0.907 |
| CCT3     | red | 0.683  | 0.667  |
| CCT5     | red | 0.723  | 0.974  |
| CDKN2AIP | red | -0.787 | -0.744 |
| CECR5    | red | 0.789  | 0.553  |
| CELSR3   | red | 0.907  | 0.903  |
| CENPI    | red | -0.629 | -0.571 |
| CENPK    | red | -0.549 | -0.500 |
| CENPQ    | red | -0.797 | -0.497 |
| CEP85L   | red | -0.926 | -0.898 |
| CETN3    | red | -0.949 | -0.920 |
| CETN4P   | red | -0.633 | -0.418 |
| CHD3     | red | 0.897  | 0.773  |
| CHID1    | red | 0.944  | 0.784  |
| CHPF2    | red | 0.832  | 0.784  |
| CHPT1    | red | -0.839 | -0.840 |
| CHRD     | red | 0.832  | 0.734  |
| CHRNA2   | red | 0.427  | 0.659  |
| CHRNA4   | red | 0.954  | 0.836  |

|                |     |        |        |
|----------------|-----|--------|--------|
| CIAO1          | red | 0.834  | 0.838  |
| CIZ1           | red | 0.944  | 0.860  |
| CLDN4          | red | 0.856  | 0.544  |
| CLEC4A         | red | -0.663 | -0.513 |
| CLPTM1L        | red | 0.942  | 0.959  |
| CLSTN1         | red | 0.859  | 0.945  |
| CLSTN3         | red | 0.858  | 0.957  |
| CNOT2          | red | -0.645 | -0.768 |
| CNOT4          | red | -0.868 | -0.539 |
| CNTNAP1        | red | 0.872  | 0.948  |
| COASY          | red | 0.625  | 0.680  |
| COPS7A         | red | 0.941  | 0.951  |
| CPLX2          | red | 0.829  | 0.949  |
| CPNE7          | red | 0.866  | 0.627  |
| CPSF1          | red | 0.888  | 0.613  |
| CPSF2          | red | -0.852 | -0.666 |
| CPT1C          | red | 0.904  | 0.964  |
| CREB3          | red | 0.799  | 0.540  |
| CRELD1         | red | 0.808  | 0.654  |
| CSMD2          | red | 0.784  | 0.415  |
| CSNK2B         | red | -0.783 | -0.632 |
| CTAGE5         | red | -0.617 | -0.811 |
| CTB-89H12.4    | red | -0.947 | -0.945 |
| CTC-281B15.1   | red | -0.448 | -0.558 |
| CTC-359D24.3   | red | -0.820 | -0.743 |
| CTC-512J14.5   | red | 0.890  | 0.676  |
| CTD-2335A18.1  | red | 0.776  | 0.826  |
| CTD-2517M22.14 | red | 0.757  | 0.424  |
| CTD-2555O16.2  | red | -0.781 | -0.467 |
| CTD-3110H11.2  | red | -0.702 | -0.728 |
| CTPS           | red | 0.848  | 0.937  |
| CUL7           | red | 0.910  | 0.950  |
| CUL9           | red | 0.935  | 0.862  |
| CXorf40A       | red | 0.882  | 0.841  |
| CXorf40B       | red | 0.830  | 0.957  |
| CYFIP2         | red | 0.796  | 0.922  |
| CYP3A4         | red | -0.660 | -0.770 |
| CYP4A11        | red | 0.719  | 0.650  |
| DAB2IP         | red | 0.676  | 0.465  |
| DALRD3         | red | 0.964  | 0.943  |
| DAPK1          | red | 0.693  | 0.753  |
| DAPK3          | red | 0.826  | 0.878  |
| DCTN1          | red | 0.969  | 0.974  |
| DCTN3          | red | 0.955  | 0.895  |
| DDAH1          | red | -0.938 | -0.843 |
| DDX59          | red | -0.830 | -0.739 |
| DENND4B        | red | 0.973  | 0.908  |

|           |     |        |        |
|-----------|-----|--------|--------|
| DEPDC4    | red | -0.857 | -0.580 |
| DEPDC5    | red | 0.908  | 0.890  |
| DGCR2     | red | 0.851  | 0.955  |
| DGKQ      | red | 0.938  | 0.867  |
| DGUOK-AS1 | red | -0.751 | -0.516 |
| DHDDS     | red | 0.897  | 0.773  |
| DHPS      | red | 0.939  | 0.899  |
| DHRS4L2   | red | 0.912  | 0.533  |
| DHRS7B    | red | 0.853  | 0.746  |
| DHX30     | red | 0.972  | 0.897  |
| DIMT1     | red | -0.891 | -0.573 |
| DIRAS1    | red | 0.858  | 0.921  |
| DLEU2     | red | -0.805 | -0.757 |
| DNAH12    | red | -0.705 | -0.554 |
| DNAJA3    | red | 0.833  | 0.845  |
| DNAJB2    | red | 0.323  | 0.531  |
| DNAJC5    | red | 0.825  | 0.936  |
| DNM1      | red | 0.942  | 0.933  |
| DPH1      | red | 0.960  | 0.681  |
| DPYS      | red | -0.694 | -0.271 |
| DPYSL4    | red | 0.951  | 0.723  |
| EBF2      | red | -0.666 | -0.239 |
| EDC4      | red | 0.922  | 0.942  |
| EFTUD2    | red | 0.940  | 0.928  |
| EHD3      | red | 0.821  | 0.913  |
| EIF2B5    | red | 0.864  | 0.739  |
| ELAC2     | red | 0.870  | 0.854  |
| EME2      | red | 0.788  | 0.889  |
| EMG1      | red | -0.841 | -0.205 |
| ENAH      | red | -0.754 | -0.920 |
| ENDOV     | red | 0.913  | 0.319  |
| ENO2      | red | 0.809  | 0.887  |
| ENTPD6    | red | 0.974  | 0.948  |
| EPHA10    | red | 0.846  | 0.962  |
| EPHB3     | red | 0.796  | 0.804  |
| EPHB6     | red | 0.937  | 0.944  |
| ERCC2     | red | 0.887  | 0.887  |
| ERCC3     | red | 0.840  | 0.879  |
| ERP44     | red | -0.751 | -0.510 |
| ESCO2     | red | -0.470 | -0.406 |
| ESYT1     | red | 0.875  | 0.823  |
| EVI5      | red | -0.877 | -0.704 |
| EVI5L     | red | 0.697  | 0.793  |
| EXOC3L1   | red | 0.912  | 0.924  |
| EXOSC8    | red | -0.908 | -0.565 |
| FAM113A   | red | 0.873  | 0.750  |
| FAM131A   | red | 0.852  | 0.947  |

|          |     |        |        |
|----------|-----|--------|--------|
| FAM163B  | red | 0.587  | 0.871  |
| FAM171A2 | red | 0.846  | 0.919  |
| FAM18B2  | red | -0.661 | -0.754 |
| FAM211A  | red | 0.772  | 0.863  |
| FAM50B   | red | 0.838  | 0.788  |
| FAM65A   | red | 0.880  | 0.848  |
| FAM72A   | red | 0.686  | 0.807  |
| FAM73B   | red | 0.799  | 0.782  |
| FARS2    | red | 0.826  | 0.861  |
| FARSA    | red | 0.967  | 0.979  |
| FBXO18   | red | 0.905  | 0.635  |
| FBXO31   | red | 0.961  | 0.867  |
| FDXACB1  | red | -0.778 | -0.334 |
| FER      | red | -0.884 | -0.954 |
| FH       | red | 0.779  | 0.666  |
| FHL2     | red | 0.923  | 0.907  |
| FIBP     | red | 0.896  | 0.878  |
| FLT3     | red | 0.399  | 0.624  |
| FMN2     | red | -0.675 | -0.727 |
| FMO2     | red | -0.707 | -0.808 |
| FOXK2    | red | 0.578  | 0.816  |
| FOXS1    | red | 0.678  | 0.425  |
| FTSJ1    | red | 0.750  | 0.840  |
| FTSJD2   | red | 0.641  | 0.809  |
| FURIN    | red | 0.904  | 0.502  |
| FXR1     | red | -0.801 | -0.716 |
| GAA      | red | 0.511  | 0.531  |
| GALNS    | red | 0.629  | 0.705  |
| GATAD1   | red | -0.926 | -0.949 |
| GBA2     | red | 0.956  | 0.922  |
| GBAS     | red | -0.833 | -0.725 |
| GDI1     | red | 0.848  | 0.933  |
| GDPD5    | red | 0.791  | 0.821  |
| GEMIN4   | red | 0.744  | 0.807  |
| GFOD2    | red | 0.915  | 0.909  |
| GGA3     | red | 0.802  | 0.959  |
| GGT7     | red | 0.886  | 0.979  |
| GHDC     | red | 0.682  | 0.630  |
| GK       | red | -0.474 | -0.686 |
| GK3P     | red | -0.646 | -0.604 |
| GLB1L2   | red | 0.855  | 0.877  |
| GMCL1    | red | -0.640 | -0.610 |
| GMPR2    | red | 0.836  | 0.901  |
| GNB1     | red | 0.789  | 0.880  |
| GPAA1    | red | 0.862  | 0.874  |
| GPR132   | red | 0.724  | 0.571  |
| GPR19    | red | -0.655 | -0.370 |

|           |     |        |        |
|-----------|-----|--------|--------|
| GPR45     | red | 0.747  | 0.835  |
| GPR68     | red | 0.819  | 0.732  |
| GRIK5     | red | 0.902  | 0.848  |
| GRIN1     | red | 0.973  | 0.948  |
| GRM4      | red | 0.882  | 0.937  |
| GSS       | red | 0.916  | 0.834  |
| GTF2F2    | red | -0.867 | -0.489 |
| GUCA1A    | red | 0.602  | 0.719  |
| GUSBP4    | red | 0.872  | 0.731  |
| HARS      | red | 0.715  | 0.790  |
| HCN2      | red | 0.926  | 0.907  |
| HCN3      | red | 0.807  | 0.779  |
| HDLBP     | red | 0.762  | 0.816  |
| HEBP2     | red | -0.560 | -0.771 |
| HGS       | red | 0.854  | 0.766  |
| HIBCH     | red | -0.870 | -0.797 |
| HIPK4     | red | 0.824  | 0.835  |
| HNRNPA2B1 | red | -0.756 | -0.693 |
| HNRNPR    | red | -0.723 | -0.396 |
| HOGA1     | red | -0.670 | -0.642 |
| HOMEZ     | red | -0.861 | -0.634 |
| HPS1      | red | 0.852  | 0.650  |
| HPS6      | red | 0.925  | 0.914  |
| HR        | red | 0.628  | 0.923  |
| HSPA12B   | red | 0.567  | 0.647  |
| HSPB11    | red | -0.875 | -0.447 |
| HTRA2     | red | 0.808  | 0.945  |
| ICAM3     | red | 0.635  | 0.782  |
| IDUA      | red | 0.858  | 0.566  |
| IFFO1     | red | 0.695  | 0.778  |
| IFT122    | red | 0.851  | 0.857  |
| IFT172    | red | 0.807  | 0.457  |
| IFT88     | red | -0.794 | -0.726 |
| IGFBP2    | red | 0.712  | 0.829  |
| IGSF8     | red | 0.877  | 0.935  |
| IGSF9B    | red | 0.749  | 0.379  |
| INCENP    | red | 0.899  | 0.923  |
| ING3      | red | -0.867 | -0.772 |
| INPP5A    | red | 0.921  | 0.916  |
| INPP5J    | red | 0.802  | 0.761  |
| INTS1     | red | 0.964  | 0.872  |
| INTS12    | red | -0.963 | -0.856 |
| IP6K1     | red | 0.815  | 0.909  |
| IQCK      | red | -0.811 | -0.724 |
| IRF2BP2   | red | -0.906 | -0.696 |
| IRF2BPL   | red | 0.457  | 0.471  |
| IRF3      | red | 0.872  | 0.540  |



|           |     |        |        |
|-----------|-----|--------|--------|
| IRGQ      | red | 0.592  | 0.770  |
| ITGA11    | red | 0.555  | 0.440  |
| IWS1      | red | -0.819 | -0.442 |
| JRK       | red | 0.745  | 0.473  |
| KATNB1    | red | 0.973  | 0.957  |
| KBTBD10   | red | -0.672 | -0.325 |
| KCNH2     | red | 0.951  | 0.853  |
| KCNJ11    | red | 0.865  | 0.951  |
| KCNK1     | red | 0.794  | 0.922  |
| KCNK9     | red | 0.865  | 0.928  |
| KCNS3     | red | 0.221  | 0.678  |
| KCNT1     | red | 0.878  | 0.910  |
| KHK       | red | 0.906  | 0.894  |
| KIAA0100  | red | 0.665  | 0.875  |
| KIAA0226  | red | 0.805  | 0.903  |
| KIAA0284  | red | 0.814  | 0.950  |
| KIAA0664  | red | 0.839  | 0.828  |
| KIF1A     | red | 0.861  | 0.939  |
| KIRREL3   | red | 0.576  | 0.863  |
| KLC2      | red | 0.926  | 0.889  |
| KLHDC8A   | red | 0.474  | 0.676  |
| KLHL18    | red | 0.867  | 0.776  |
| KLHL5     | red | -0.681 | -0.750 |
| KRBA1     | red | 0.580  | 0.634  |
| L1CAM     | red | 0.942  | 0.958  |
| L2HGDH    | red | -0.607 | -0.575 |
| L3MBTL2   | red | 0.806  | 0.727  |
| LAMB3     | red | 0.845  | 0.828  |
| LCN8      | red | 0.658  | 0.379  |
| LECT1     | red | -0.503 | -0.537 |
| LEPROT    | red | -0.857 | -0.861 |
| LHFPL4    | red | 0.927  | 0.919  |
| LIG1      | red | 0.747  | 0.521  |
| LIMK1     | red | 0.949  | 0.857  |
| LIMS1     | red | -0.906 | -0.910 |
| LINC00242 | red | 0.793  | 0.714  |
| LINC00467 | red | -0.829 | -0.723 |
| LPP       | red | -0.705 | -0.930 |
| LRAT      | red | -0.526 | -0.900 |
| LRR1      | red | -0.905 | -0.911 |
| LRRC14    | red | 0.957  | 0.984  |
| LRRC16B   | red | 0.743  | 0.845  |
| LRRC19    | red | -0.791 | -0.740 |
| LRRC58    | red | -0.893 | -0.816 |
| LRRC73    | red | 0.943  | 0.866  |
| LRRFIP2   | red | -0.691 | -0.880 |
| LRRK1     | red | 0.742  | 0.804  |

|             |     |        |        |
|-------------|-----|--------|--------|
| LSM6        | red | -0.782 | -0.716 |
| LVRN        | red | -0.657 | -0.587 |
| LYNX1       | red | 0.815  | 0.953  |
| LYPLAL1     | red | -0.926 | -0.897 |
| LZTR1       | red | 0.936  | 0.706  |
| MADD        | red | 0.752  | 0.946  |
| MAEA        | red | 0.912  | 0.903  |
| MAP3K12     | red | 0.958  | 0.873  |
| MAPK13      | red | 0.911  | 0.915  |
| MAPK8IP3    | red | 0.943  | 0.972  |
| MAPKBP1     | red | 0.905  | 0.637  |
| MAST1       | red | 0.953  | 0.931  |
| MBD1        | red | 0.897  | 0.872  |
| MCF2L       | red | 0.745  | 0.761  |
| MED24       | red | 0.829  | 0.800  |
| MEGF8       | red | 0.850  | 0.923  |
| METTL19     | red | 0.559  | 0.544  |
| MEX3D       | red | -0.835 | -0.762 |
| MGAT3       | red | 0.731  | 0.957  |
| MGRN1       | red | 0.754  | 0.558  |
| MID1IP1-AS1 | red | -0.632 | -0.744 |
| MIR621      | red | 0.718  | 0.590  |
| MKL1        | red | 0.831  | 0.476  |
| MKRN2       | red | 0.593  | 0.645  |
| MLH3        | red | -0.751 | -0.933 |
| MLK7-AS1    | red | -0.533 | -0.661 |
| MMS19       | red | 0.940  | 0.925  |
| MOCS3       | red | 0.502  | 0.828  |
| MORN1       | red | 0.834  | 0.432  |
| MPPED1      | red | 0.889  | 0.929  |
| MPRIIP      | red | 0.841  | 0.865  |
| MRPL17      | red | 0.841  | 0.678  |
| MTUS2-AS1   | red | 0.688  | 0.596  |
| MYBBP1A     | red | 0.924  | 0.833  |
| MYH15       | red | -0.685 | -0.556 |
| MYO7A       | red | 0.594  | 0.820  |
| N4BP2L1     | red | -0.632 | -0.457 |
| N4BP2L2     | red | -0.870 | -0.897 |
| N4BP3       | red | 0.714  | 0.915  |
| NARF        | red | 0.735  | 0.370  |
| NAT8L       | red | 0.909  | 0.705  |
| NBR2        | red | -0.530 | -0.432 |
| NCAPH2      | red | 0.980  | 0.874  |
| NCLN        | red | 0.879  | 0.602  |
| NCOR2       | red | 0.613  | 0.820  |
| NDUFS7      | red | 0.804  | 0.813  |
| NDUFV1      | red | 0.951  | 0.893  |

|         |     |        |        |
|---------|-----|--------|--------|
| NECAB3  | red | 0.861  | 0.923  |
| NEK1    | red | -0.701 | -0.830 |
| NEK5    | red | -0.742 | -0.520 |
| NEU1    | red | 0.975  | 0.718  |
| NEURL4  | red | 0.974  | 0.944  |
| NFE2L1  | red | 0.901  | 0.963  |
| NGEF    | red | 0.958  | 0.954  |
| NICN1   | red | 0.903  | 0.923  |
| NIPBL   | red | -0.933 | -0.856 |
| NISCH   | red | 0.957  | 0.947  |
| NKAP    | red | -0.512 | -0.402 |
| NKTR    | red | -0.722 | -0.874 |
| NLE1    | red | 0.939  | 0.937  |
| NLGN2   | red | 0.718  | 0.862  |
| NLRP14  | red | -0.540 | -0.500 |
| NOL8    | red | -0.937 | -0.714 |
| NOMO1   | red | 0.807  | 0.873  |
| NOTUM   | red | 0.750  | 0.475  |
| NPM1    | red | -0.776 | -0.588 |
| NRXN2   | red | 0.700  | 0.793  |
| NSUN6   | red | -0.829 | -0.619 |
| NTN3    | red | 0.690  | 0.597  |
| NUDCD3  | red | 0.938  | 0.953  |
| NUDT18  | red | 0.659  | 0.536  |
| NUF2    | red | -0.757 | -0.699 |
| OBSCN   | red | 0.870  | 0.425  |
| OGDHL   | red | 0.930  | 0.836  |
| OGG1    | red | 0.804  | 0.351  |
| OPRD1   | red | 0.754  | 0.910  |
| OSGEPL1 | red | -0.889 | -0.712 |
| P2RY14  | red | -0.467 | -0.830 |
| P4HTM   | red | 0.945  | 0.872  |
| PABPC4L | red | 0.739  | 0.302  |
| PACS1   | red | 0.849  | 0.697  |
| PANK4   | red | 0.873  | 0.893  |
| PAPOLB  | red | -0.659 | -0.577 |
| PARVB   | red | 0.850  | 0.798  |
| PCDHA7  | red | 0.762  | 0.772  |
| PCGF6   | red | -0.684 | -0.819 |
| PDGFB   | red | 0.781  | 0.931  |
| PDPN    | red | -0.520 | -0.770 |
| PDXK    | red | 0.697  | 0.741  |
| PEF1    | red | 0.953  | 0.768  |
| PES1    | red | 0.936  | 0.461  |
| PEX11B  | red | 0.794  | 0.843  |
| PEX14   | red | 0.876  | 0.880  |
| PEX5    | red | 0.547  | 0.855  |

|         |     |        |        |
|---------|-----|--------|--------|
| PEX6    | red | 0.472  | 0.594  |
| PFAS    | red | 0.784  | 0.915  |
| PGGT1B  | red | -0.940 | -0.877 |
| PGM5P2  | red | -0.744 | -0.591 |
| PGS1    | red | 0.859  | 0.758  |
| PHB     | red | 0.748  | 0.794  |
| PHC1    | red | 0.343  | 0.171  |
| PHF3    | red | -0.921 | -0.910 |
| PI4KA   | red | 0.694  | 0.936  |
| PICK1   | red | 0.703  | 0.669  |
| PIH1D1  | red | 0.864  | 0.797  |
| PIP5K1A | red | -0.740 | -0.791 |
| PISD    | red | 0.780  | 0.769  |
| PITPNM1 | red | 0.930  | 0.855  |
| PKD1    | red | 0.910  | 0.871  |
| PKD2L2  | red | -0.707 | -0.766 |
| PKM2    | red | 0.948  | 0.924  |
| PLA2G15 | red | 0.844  | 0.892  |
| PLA2G4C | red | 0.474  | 0.482  |
| PLEC    | red | 0.764  | 0.475  |
| PLEKHA6 | red | 0.815  | 0.934  |
| PLEKHG5 | red | 0.953  | 0.850  |
| PLXNA1  | red | 0.736  | 0.897  |
| PLXND1  | red | 0.752  | 0.820  |
| PMP2    | red | -0.870 | -0.902 |
| PNPLA6  | red | 0.970  | 0.940  |
| PNPT1   | red | -0.915 | -0.748 |
| PNRC1   | red | -0.970 | -0.821 |
| POLD3   | red | -0.706 | -0.631 |
| POLR2M  | red | -0.646 | -0.811 |
| POLRMT  | red | 0.831  | 0.691  |
| PPARD   | red | 0.882  | 0.677  |
| PPAT    | red | -0.816 | -0.701 |
| PPIL2   | red | 0.892  | 0.684  |
| PPL     | red | 0.804  | 0.918  |
| PPM1F   | red | 0.899  | 0.772  |
| PPP2R1A | red | 0.987  | 0.837  |
| PPP2R2D | red | 0.929  | 0.902  |
| PPP2R4  | red | 0.909  | 0.742  |
| PPP5C   | red | 0.935  | 0.926  |
| PRDM1   | red | -0.765 | -0.835 |
| PRDM15  | red | 0.751  | 0.524  |
| PREB    | red | 0.695  | 0.455  |
| PRIM2   | red | -0.710 | -0.505 |
| PRMT1   | red | 0.890  | 0.494  |
| PRMT7   | red | 0.872  | 0.866  |
| PRPF3   | red | -0.760 | -0.519 |

|               |     |        |        |
|---------------|-----|--------|--------|
| PRPF38B       | red | -0.880 | -0.737 |
| PRR4          | red | -0.725 | -0.765 |
| PRRG4         | red | -0.723 | -0.786 |
| PSMA1         | red | -0.476 | -0.423 |
| PSMA3         | red | -0.604 | -0.923 |
| PSMB5         | red | 0.638  | 0.762  |
| PSMD2         | red | 0.919  | 0.938  |
| PSMD3         | red | 0.969  | 0.937  |
| PTGER4P2      | red | 0.673  | 0.506  |
| PTGES         | red | 0.663  | 0.852  |
| PTGR2         | red | -0.759 | -0.793 |
| PTPN5         | red | 0.912  | 0.884  |
| PUF60         | red | 0.885  | 0.785  |
| RAB1B         | red | 0.947  | 0.750  |
| RAB27A        | red | -0.828 | -0.809 |
| RAB28         | red | -0.853 | -0.822 |
| RAB40B        | red | 0.616  | 0.600  |
| RAB40C        | red | 0.909  | 0.878  |
| RAD21-AS1     | red | -0.572 | -0.371 |
| RAD51AP1      | red | -0.727 | -0.381 |
| RAD51D        | red | 0.922  | 0.812  |
| RANBP10       | red | 0.740  | 0.612  |
| RANGAP1       | red | 0.983  | 0.935  |
| RASGRP2       | red | 0.824  | 0.858  |
| RBBP7         | red | 0.720  | 0.591  |
| RBM15B        | red | 0.579  | 0.654  |
| RBM17         | red | -0.840 | -0.903 |
| RBM4          | red | -0.607 | -0.830 |
| RCN3          | red | 0.699  | 0.571  |
| RELL2         | red | 0.525  | 0.741  |
| REXO2         | red | -0.717 | -0.919 |
| RFC1          | red | -0.876 | -0.650 |
| RG9MTD2       | red | -0.820 | -0.490 |
| RHOT2         | red | 0.914  | 0.781  |
| RIC8A         | red | 0.827  | 0.873  |
| RIPK2         | red | -0.837 | -0.795 |
| RMND5B        | red | 0.922  | 0.805  |
| RNF123        | red | 0.958  | 0.925  |
| RNF187        | red | 0.948  | 0.897  |
| RNF26         | red | 0.649  | 0.917  |
| RNF44         | red | 0.825  | 0.839  |
| RP11-113K21.5 | red | -0.557 | -0.723 |
| RP11-119B16.2 | red | -0.773 | -0.528 |
| RP11-158K1.3  | red | -0.731 | -0.965 |
| RP11-166D19.1 | red | -0.926 | -0.773 |
| RP11-177H13.2 | red | 0.814  | 0.455  |
| RP11-213G2.3  | red | -0.825 | -0.788 |

|               |     |        |        |
|---------------|-----|--------|--------|
| RP11-266K4.9  | red | 0.897  | 0.781  |
| RP11-286H14.4 | red | 0.848  | 0.858  |
| RP11-323F24.1 | red | -0.580 | -0.670 |
| RP11-332O19.5 | red | 0.732  | 0.752  |
| RP11-342D11.2 | red | -0.828 | -0.542 |
| RP11-382J12.1 | red | -0.518 | -0.742 |
| RP11-440L14.1 | red | -0.659 | -0.690 |
| RP11-444D3.1  | red | -0.594 | -0.472 |
| RP11-510H23.1 | red | -0.501 | -0.773 |
| RP11-658F2.8  | red | -0.730 | -0.770 |
| RP11-98D18.3  | red | 0.773  | 0.729  |
| RP13-895J2.2  | red | 0.727  | 0.840  |
| RP4-639F20.1  | red | -0.885 | -0.708 |
| RP4-749H3.1   | red | 0.549  | 0.275  |
| RPAP1         | red | 0.800  | 0.721  |
| RPE65         | red | -0.656 | -0.807 |
| RPGR          | red | -0.572 | -0.883 |
| RPL21         | red | -0.526 | -0.594 |
| RPS6KL1       | red | 0.834  | 0.871  |
| RPTOR         | red | 0.802  | 0.926  |
| RRAGC         | red | -0.723 | -0.800 |
| RUSC2         | red | 0.868  | 0.983  |
| RXRB          | red | 0.934  | 0.907  |
| SAE1          | red | 0.920  | 0.946  |
| SAP30         | red | -0.735 | -0.568 |
| SARM1         | red | 0.795  | 0.589  |
| SASS6         | red | -0.792 | -0.851 |
| SAV1          | red | -0.863 | -0.632 |
| SCAF11        | red | -0.932 | -0.907 |
| SCFD2         | red | 0.789  | 0.838  |
| SCG3          | red | -0.830 | -0.539 |
| SCNN1D        | red | 0.830  | 0.733  |
| SCYL1         | red | 0.986  | 0.920  |
| SDF2          | red | 0.923  | 0.800  |
| SELS          | red | -0.577 | -0.767 |
| SEMA5B        | red | 0.791  | 0.883  |
| SEMA6C        | red | 0.878  | 0.885  |
| SEMA7A        | red | 0.776  | 0.905  |
| SENP6         | red | -0.820 | -0.752 |
| SFXN3         | red | 0.940  | 0.923  |
| SGCG          | red | 0.587  | 0.598  |
| SGSM1         | red | 0.938  | 0.869  |
| SGSM3         | red | 0.973  | 0.837  |
| SH2B1         | red | 0.833  | 0.715  |
| SH3BP5L       | red | 0.786  | 0.903  |
| SH3GLB2       | red | 0.906  | 0.682  |
| SHISA7        | red | 0.728  | 0.872  |

|          |     |        |        |
|----------|-----|--------|--------|
| SKIV2L   | red | 0.911  | 0.727  |
| SLC12A5  | red | 0.847  | 0.926  |
| SLC20A1  | red | 0.527  | 0.780  |
| SLC22A18 | red | 0.870  | 0.542  |
| SLC27A4  | red | 0.887  | 0.973  |
| SLC29A1  | red | 0.869  | 0.908  |
| SLC35E3  | red | -0.551 | -0.691 |
| SLC38A4  | red | -0.392 | -0.705 |
| SLC39A4  | red | 0.711  | 0.775  |
| SLC43A2  | red | 0.964  | 0.904  |
| SLC46A3  | red | -0.671 | -0.619 |
| SLC5A12  | red | -0.629 | -0.523 |
| SLC7A4   | red | 0.878  | 0.934  |
| SLC9A1   | red | 0.923  | 0.930  |
| SMC3     | red | -0.987 | -0.825 |
| SMC4     | red | -0.929 | -0.598 |
| SMCR7    | red | 0.755  | 0.862  |
| SMUG1    | red | 0.782  | 0.909  |
| SNAP47   | red | 0.913  | 0.911  |
| SND1     | red | 0.986  | 0.891  |
| SNHG6    | red | -0.441 | -0.662 |
| SNRPG    | red | -0.871 | -0.786 |
| SNX17    | red | 0.729  | 0.894  |
| SOGA2    | red | 0.671  | 0.721  |
| SPAG1    | red | -0.698 | -0.679 |
| SPG20    | red | -0.829 | -0.663 |
| SPRYD3   | red | 0.925  | 0.943  |
| SPTBN1   | red | 0.711  | 0.802  |
| SPTSSA   | red | -0.879 | -0.885 |
| SRBD1    | red | -0.750 | -0.269 |
| SRFBP1   | red | -0.874 | -0.925 |
| SRRM1    | red | -0.739 | -0.820 |
| SSSCA1   | red | 0.871  | 0.867  |
| ST7L     | red | -0.898 | -0.835 |
| ST8SIA5  | red | 0.738  | 0.905  |
| STK11IP  | red | 0.806  | 0.842  |
| STX1B    | red | 0.955  | 0.961  |
| STX2     | red | -0.527 | -0.834 |
| SUV39H2  | red | -0.747 | -0.681 |
| SV2A     | red | 0.839  | 0.879  |
| SYNGR1   | red | 0.830  | 0.946  |
| SYT7     | red | 0.804  | 0.886  |
| TAOK2    | red | 0.840  | 0.853  |
| TAX1BP3  | red | -0.665 | -0.518 |
| TBC1D10B | red | 0.645  | 0.767  |
| TBC1D13  | red | 0.708  | 0.925  |
| TBC1D24  | red | 0.757  | 0.804  |

|          |     |        |        |
|----------|-----|--------|--------|
| TBC1D25  | red | 0.792  | 0.963  |
| TBCD     | red | 0.918  | 0.957  |
| TBRG4    | red | 0.923  | 0.932  |
| TCEB3    | red | -0.947 | -0.753 |
| TCTE1    | red | 0.817  | 0.777  |
| TDRD12   | red | -0.631 | -0.378 |
| TDRD3    | red | -0.880 | -0.664 |
| TECPR1   | red | 0.921  | 0.738  |
| TFAM     | red | -0.839 | -0.682 |
| TGDS     | red | -0.939 | -0.903 |
| THAP11   | red | 0.863  | 0.862  |
| THOC1    | red | -0.962 | -0.886 |
| THOC5    | red | 0.681  | 0.564  |
| TIGD1    | red | -0.581 | -0.707 |
| TM2D1    | red | -0.884 | -0.625 |
| TMBIM4   | red | -0.647 | -0.421 |
| TMC1     | red | -0.759 | -0.823 |
| TMEM106C | red | 0.945  | 0.713  |
| TMEM151B | red | 0.783  | 0.931  |
| TMEM179  | red | 0.839  | 0.947  |
| TMEM192  | red | -0.836 | -0.878 |
| TMEM200B | red | 0.620  | 0.526  |
| TMEM63B  | red | 0.921  | 0.914  |
| TMEM63C  | red | 0.814  | 0.930  |
| TMEM8B   | red | 0.930  | 0.599  |
| TMUB2    | red | 0.731  | 0.727  |
| TNN      | red | 0.845  | 0.786  |
| TNNC1    | red | 0.691  | 0.569  |
| TNPO2    | red | 0.866  | 0.754  |
| TNXB     | red | 0.547  | 0.419  |
| TOLLIP   | red | 0.914  | 0.891  |
| TOMM5    | red | -0.711 | -0.670 |
| TOPORS   | red | -0.727 | -0.868 |
| TPTE2    | red | -0.426 | -0.530 |
| TRAP1    | red | 0.835  | 0.879  |
| TRIM14   | red | -0.745 | -0.632 |
| TRIO     | red | 0.720  | 0.382  |
| TRMT11   | red | -0.449 | -0.669 |
| TROVE2   | red | -0.930 | -0.921 |
| TRPA1    | red | -0.336 | -0.626 |
| TRPM2    | red | 0.953  | 0.964  |
| TSNARE1  | red | 0.860  | 0.774  |
| TSPAN32  | red | 0.640  | 0.667  |
| TTBK1    | red | 0.862  | 0.968  |
| TTC26    | red | -0.849 | -0.413 |
| TTC35    | red | -0.823 | -0.778 |
| TTC4     | red | -0.502 | -0.618 |



|         |     |        |        |
|---------|-----|--------|--------|
| TUBGCP6 | red | 0.908  | 0.802  |
| TXNDC12 | red | -0.805 | -0.379 |
| TXNL4B  | red | -0.572 | -0.781 |
| TXNRD3  | red | -0.489 | -0.557 |
| TYRO3   | red | 0.846  | 0.923  |
| TYW5    | red | -0.923 | -0.894 |
| UBA1    | red | 0.893  | 0.832  |
| UBB     | red | 0.889  | 0.810  |
| UBE2G2  | red | -0.856 | -0.877 |
| UBE2O   | red | 0.981  | 0.957  |
| UBL4A   | red | 0.926  | 0.931  |
| UBN2    | red | -0.885 | -0.925 |
| ULK1    | red | 0.859  | 0.799  |
| UNC13B  | red | 0.828  | 0.762  |
| UNC5A   | red | 0.941  | 0.931  |
| URGCP   | red | 0.747  | 0.607  |
| URM1    | red | 0.824  | 0.607  |
| USP20   | red | 0.950  | 0.840  |
| USP3    | red | -0.886 | -0.950 |
| USP35   | red | 0.859  | 0.918  |
| USP5    | red | 0.863  | 0.929  |
| USP53   | red | -0.883 | -0.805 |
| VAR5    | red | 0.931  | 0.871  |
| VAR52   | red | 0.864  | 0.518  |
| VCP     | red | 0.932  | 0.873  |
| VEGFA   | red | -0.583 | -0.734 |
| VIPR2   | red | 0.466  | 0.845  |
| VPS18   | red | 0.853  | 0.950  |
| VPS25   | red | 0.818  | 0.761  |
| VPS33B  | red | 0.814  | 0.742  |
| VPS39   | red | 0.805  | 0.808  |
| VSTM5   | red | 0.548  | 0.842  |
| WDR4    | red | 0.934  | 0.805  |
| WDR74   | red | 0.764  | 0.787  |
| WDR89   | red | -0.791 | -0.876 |
| WEE1    | red | -0.640 | -0.862 |
| WNK2    | red | 0.955  | 0.947  |
| WNT5B   | red | 0.739  | 0.535  |
| WRNIP1  | red | 0.872  | 0.838  |
| WTAP    | red | -0.809 | -0.875 |
| XRN2    | red | -0.566 | -0.801 |
| YIPF2   | red | 0.969  | 0.847  |
| YIPF3   | red | 0.898  | 0.829  |
| YIPF6   | red | -0.903 | -0.917 |
| ZACN    | red | 0.725  | 0.490  |
| ZC3H7B  | red | 0.911  | 0.949  |
| ZCCHC6  | red | -0.916 | -0.859 |

|            |           |        |        |
|------------|-----------|--------|--------|
| ZDHC8      | red       | 0.844  | 0.941  |
| ZER1       | red       | 0.913  | 0.947  |
| ZFAND6     | red       | -0.787 | -0.856 |
| ZFYVE19    | red       | 0.933  | 0.807  |
| ZFYVE27    | red       | 0.760  | 0.884  |
| ZGPAT      | red       | 0.818  | 0.575  |
| ZMAT1      | red       | -0.943 | -0.961 |
| ZMYND10    | red       | 0.674  | 0.364  |
| ZNF124     | red       | -0.708 | -0.638 |
| ZNF140     | red       | -0.733 | -0.856 |
| ZNF213     | red       | 0.630  | 0.763  |
| ZNF222     | red       | -0.546 | -0.375 |
| ZNF335     | red       | 0.937  | 0.564  |
| ZNF426     | red       | -0.752 | -0.771 |
| ZNF430     | red       | -0.836 | -0.951 |
| ZNF44      | red       | -0.707 | -0.862 |
| ZNF48      | red       | 0.967  | 0.911  |
| ZNF497     | red       | 0.813  | 0.833  |
| ZNF500     | red       | 0.763  | 0.692  |
| ZNF501     | red       | -0.789 | -0.664 |
| ZNF512B    | red       | 0.846  | 0.868  |
| ZNF517     | red       | 0.626  | 0.626  |
| ZNF583     | red       | -0.824 | -0.817 |
| ZNF622     | red       | 0.943  | 0.936  |
| ZNF682     | red       | -0.899 | -0.581 |
| ZNF738     | red       | -0.768 | -0.581 |
| ZNF75A     | red       | -0.725 | -0.716 |
| ZNF763     | red       | -0.532 | -0.499 |
| ZNF766     | red       | -0.861 | -0.921 |
| ZNF782     | red       | -0.874 | -0.418 |
| ZNF853     | red       | 0.639  | 0.410  |
| ZNF93      | red       | -0.694 | -0.349 |
| ZNHIT6     | red       | -0.790 | -0.752 |
| ABCB10     | royalblue | -0.831 | -0.579 |
| AC007621.1 | royalblue | 0.786  | 0.813  |
| AC008073.6 | royalblue | 0.973  | 0.917  |
| AC090699.1 | royalblue | 0.760  | 0.673  |
| AC092839.1 | royalblue | 0.829  | 0.887  |
| AC126544.2 | royalblue | -0.752 | -0.866 |
| AC140481.8 | royalblue | 0.783  | 0.680  |
| ADAL       | royalblue | 0.791  | 0.942  |
| ADARB2     | royalblue | -0.766 | -0.711 |
| ADNP       | royalblue | -0.878 | -0.949 |
| ADNP2      | royalblue | -0.871 | -0.925 |
| ANKRD11    | royalblue | 0.891  | 0.888  |
| ANKRD33B   | royalblue | -0.664 | -0.754 |
| APOBEC4    | royalblue | 0.868  | 0.675  |

|               |           |        |        |
|---------------|-----------|--------|--------|
| ASAP2         | royalblue | -0.756 | -0.895 |
| ASXL1         | royalblue | -0.830 | -0.821 |
| ATP5I         | royalblue | 0.765  | 0.440  |
| C11orf42      | royalblue | -0.647 | -0.861 |
| C12orf65      | royalblue | 0.865  | 0.937  |
| C3orf26       | royalblue | 0.887  | 0.798  |
| C3orf72       | royalblue | -0.805 | -0.575 |
| C9orf103      | royalblue | 0.831  | 0.794  |
| C9orf78       | royalblue | 0.885  | 0.927  |
| CA1           | royalblue | 0.970  | 0.617  |
| CATSPER2P1    | royalblue | 0.691  | 0.839  |
| CCDC18        | royalblue | 0.880  | 0.947  |
| CCDC34        | royalblue | 0.843  | 0.946  |
| CCDC59        | royalblue | 0.846  | 0.957  |
| CD160         | royalblue | 0.940  | 0.772  |
| CD3EAP        | royalblue | 0.956  | 0.822  |
| CENPJ         | royalblue | 0.917  | 0.612  |
| CFDP1         | royalblue | 0.921  | 0.874  |
| CHL1-AS1      | royalblue | 0.894  | 0.790  |
| CLIC5         | royalblue | -0.711 | -0.746 |
| CNOT1         | royalblue | -0.838 | -0.895 |
| CNPY2         | royalblue | 0.794  | 0.892  |
| COMMD1        | royalblue | 0.782  | 0.872  |
| CRLF3         | royalblue | 0.927  | 0.816  |
| CSPP1         | royalblue | 0.921  | 0.969  |
| CTC-228N24.3  | royalblue | 0.853  | 0.760  |
| CTC-358I24.1  | royalblue | 0.783  | 0.769  |
| CTD-3065J16.9 | royalblue | 0.834  | 0.725  |
| DACT2         | royalblue | -0.794 | -0.529 |
| DDX10         | royalblue | 0.837  | 0.890  |
| DUSP28        | royalblue | 0.775  | 0.753  |
| EAPP          | royalblue | 0.815  | 0.850  |
| EEF1A1        | royalblue | 0.500  | 0.828  |
| EFCAB6-AS1    | royalblue | 0.664  | 0.765  |
| EFNA3         | royalblue | 0.683  | 0.808  |
| ERICH1        | royalblue | 0.871  | 0.845  |
| FAM123B       | royalblue | -0.910 | -0.898 |
| FAM40A        | royalblue | -0.754 | -0.831 |
| FAM89B        | royalblue | 0.946  | 0.746  |
| FBXL22        | royalblue | 0.760  | 0.490  |
| GAS5          | royalblue | 0.797  | 0.860  |
| GMFG          | royalblue | 0.654  | 0.629  |
| GRHL2         | royalblue | 0.666  | 0.868  |
| GRK4          | royalblue | 0.951  | 0.927  |
| GTF2H5        | royalblue | 0.757  | 0.740  |
| GTPBP4        | royalblue | 0.876  | 0.836  |
| HDDC2         | royalblue | 0.764  | 0.762  |

|             |           |        |        |
|-------------|-----------|--------|--------|
| HEATR6      | royalblue | -0.754 | -0.819 |
| HIGD2A      | royalblue | 0.944  | 0.812  |
| HIST1H4C    | royalblue | 0.572  | 0.726  |
| HPSE        | royalblue | -0.622 | -0.816 |
| HTATSF1     | royalblue | 0.914  | 0.696  |
| INSL5       | royalblue | 0.797  | 0.492  |
| JPX         | royalblue | 0.707  | 0.609  |
| KCND1       | royalblue | -0.858 | -0.832 |
| KCNK10      | royalblue | -0.893 | -0.918 |
| KIAA0020    | royalblue | 0.908  | 0.985  |
| KIAA1257    | royalblue | 0.780  | 0.855  |
| KIF15       | royalblue | 0.966  | 0.896  |
| LIG3        | royalblue | -0.803 | -0.874 |
| LINC00338   | royalblue | 0.584  | 0.948  |
| LOH12CR1    | royalblue | -0.840 | -0.873 |
| LRP8        | royalblue | -0.439 | -0.913 |
| LRRIQ3      | royalblue | 0.556  | 0.671  |
| LTV1        | royalblue | 0.771  | 0.897  |
| MARS2       | royalblue | -0.737 | -0.861 |
| MED19       | royalblue | 0.863  | 0.975  |
| METAP2      | royalblue | 0.849  | 0.912  |
| MPHOSPH8    | royalblue | 0.914  | 0.960  |
| MRPL51      | royalblue | 0.888  | 0.643  |
| MTIF3       | royalblue | 0.759  | 0.887  |
| MTMR1       | royalblue | -0.903 | -0.625 |
| N4BP2L2-IT1 | royalblue | 0.883  | 0.851  |
| NCAPD3      | royalblue | -0.918 | -0.951 |
| NDUFA6      | royalblue | 0.956  | 0.758  |
| NEDD8       | royalblue | 0.580  | 0.594  |
| NEMF        | royalblue | 0.909  | 0.969  |
| NLRP9       | royalblue | 0.644  | 0.831  |
| NME1        | royalblue | 0.706  | 0.559  |
| NOMO2       | royalblue | -0.701 | -0.759 |
| NR2F6       | royalblue | 0.683  | 0.894  |
| OR1B1       | royalblue | -0.621 | -0.681 |
| PAK1IP1     | royalblue | 0.887  | 0.940  |
| PATE2       | royalblue | 0.791  | 0.911  |
| PDCD5       | royalblue | 0.801  | 0.578  |
| PDCD7       | royalblue | 0.947  | 0.976  |
| PDE12       | royalblue | -0.828 | -0.855 |
| PFN1        | royalblue | 0.646  | 0.583  |
| PHIP        | royalblue | 0.867  | 0.932  |
| PNISR       | royalblue | 0.899  | 0.905  |
| POLR1A      | royalblue | -0.844 | -0.889 |
| PPP1R12A    | royalblue | 0.878  | 0.882  |
| PPP3R2      | royalblue | 0.820  | 0.795  |
| PRINS       | royalblue | 0.607  | 0.853  |

|                |           |        |        |
|----------------|-----------|--------|--------|
| PRSS37         | royalblue | 0.687  | 0.545  |
| RBBP4          | royalblue | -0.810 | -0.915 |
| RBM25          | royalblue | 0.929  | 0.962  |
| RBM34          | royalblue | 0.675  | 0.681  |
| RINL           | royalblue | 0.632  | 0.710  |
| RNF224         | royalblue | -0.907 | -0.800 |
| RP11-152F13.5  | royalblue | 0.730  | 0.830  |
| RP11-167N4.2   | royalblue | 0.560  | 0.662  |
| RP11-183E9.3   | royalblue | 0.832  | 0.891  |
| RP11-372E1.6   | royalblue | 0.921  | 0.699  |
| RP11-386G11.10 | royalblue | 0.927  | 0.544  |
| RP11-434C1.1   | royalblue | 0.928  | 0.923  |
| RP11-506O24.1  | royalblue | 0.800  | 0.889  |
| RP11-52J3.2    | royalblue | 0.699  | 0.824  |
| RP11-58B17.1   | royalblue | 0.901  | 0.721  |
| RP11-933H2.4   | royalblue | 0.812  | 0.778  |
| RP11-977G19.11 | royalblue | 0.812  | 0.796  |
| RP11-977G19.5  | royalblue | 0.756  | 0.791  |
| RP3-322I12.2   | royalblue | 0.824  | 0.631  |
| RP4-604G5.1    | royalblue | 0.824  | 0.495  |
| RP4-724E13.2   | royalblue | -0.888 | -0.727 |
| RP5-934G17.2   | royalblue | 0.644  | 0.812  |
| RPL23A         | royalblue | 0.797  | 0.615  |
| RPL4           | royalblue | 0.928  | 0.680  |
| RRP7A          | royalblue | 0.674  | 0.718  |
| RSRC1          | royalblue | 0.865  | 0.843  |
| RUSC1-AS1      | royalblue | 0.671  | 0.712  |
| SARNP          | royalblue | 0.801  | 0.880  |
| SCAPER         | royalblue | 0.814  | 0.964  |
| SDCCAG8        | royalblue | 0.909  | 0.971  |
| SFTA1P         | royalblue | 0.914  | 0.918  |
| SHFM1          | royalblue | 0.843  | 0.736  |
| SIAH2-AS1      | royalblue | 0.870  | 0.764  |
| SLC34A3        | royalblue | -0.860 | -0.656 |
| SLC4A7         | royalblue | 0.854  | 0.905  |
| SLC5A4         | royalblue | 0.516  | 0.878  |
| SLC7A1         | royalblue | -0.663 | -0.927 |
| SLTM           | royalblue | 0.877  | 0.896  |
| SMC6           | royalblue | 0.794  | 0.976  |
| SNRNP27        | royalblue | 0.839  | 0.865  |
| SNRPF          | royalblue | 0.544  | 0.570  |
| SORD           | royalblue | -0.791 | -0.814 |
| SOX7           | royalblue | 0.739  | 0.611  |
| SPIN4          | royalblue | -0.764 | -0.879 |
| SRSF8          | royalblue | 0.789  | 0.733  |
| SYNJ2BP        | royalblue | 0.661  | 0.670  |
| TBC1D16        | royalblue | -0.722 | -0.505 |

|             |             |        |        |
|-------------|-------------|--------|--------|
| TCEAL2      | royalblue   | 0.804  | 0.824  |
| TCF19       | royalblue   | -0.626 | -0.634 |
| TET3        | royalblue   | -0.891 | -0.906 |
| TGS1        | royalblue   | 0.930  | 0.988  |
| TNFSF12     | royalblue   | 0.782  | 0.717  |
| TTF1        | royalblue   | 0.913  | 0.924  |
| TYW1        | royalblue   | 0.370  | 0.829  |
| UBE2Q2P1    | royalblue   | 0.736  | 0.897  |
| UTP14A      | royalblue   | 0.774  | 0.804  |
| WDR55       | royalblue   | -0.952 | -0.820 |
| WHAMM       | royalblue   | 0.752  | 0.900  |
| YTHDC1      | royalblue   | 0.749  | 0.902  |
| ZBED4       | royalblue   | -0.848 | -0.582 |
| ZBTB40      | royalblue   | -0.841 | -0.746 |
| ZC3H15      | royalblue   | 0.877  | 0.850  |
| ZCCHC14     | royalblue   | -0.665 | -0.772 |
| ZNF398      | royalblue   | -0.516 | -0.888 |
| ZNF623      | royalblue   | -0.603 | -0.796 |
| ZNF69       | royalblue   | 0.821  | 0.853  |
| ZNF740      | royalblue   | -0.669 | -0.971 |
| AC016738.4  | saddlebrown | 0.708  | 0.721  |
| AC018720.10 | saddlebrown | 0.920  | 0.648  |
| AC133919.6  | saddlebrown | 0.856  | 0.599  |
| ACSBG2      | saddlebrown | 0.762  | 0.711  |
| AGPAT1      | saddlebrown | -0.664 | -0.918 |
| AIFM3       | saddlebrown | 0.892  | 0.807  |
| AK7         | saddlebrown | -0.845 | -0.673 |
| ANKLE1      | saddlebrown | 0.918  | 0.755  |
| ANP32A      | saddlebrown | -0.816 | -0.710 |
| ANXA2       | saddlebrown | 0.841  | 0.839  |
| ANXA2P2     | saddlebrown | 0.834  | 0.820  |
| AP000347.4  | saddlebrown | 0.687  | 0.860  |
| AP5B1       | saddlebrown | 0.802  | 0.788  |
| ARHGAP39    | saddlebrown | 0.949  | 0.738  |
| BTBD19      | saddlebrown | 0.913  | 0.720  |
| C12orf59    | saddlebrown | -0.517 | -0.758 |
| C15orf62    | saddlebrown | 0.815  | 0.643  |
| C16orf53    | saddlebrown | 0.782  | 0.762  |
| C17orf69    | saddlebrown | 0.854  | 0.855  |
| C5orf45     | saddlebrown | 0.874  | 0.723  |
| C9orf133    | saddlebrown | 0.736  | 0.626  |
| CACNA1C-AS1 | saddlebrown | 0.891  | 0.852  |
| CCDC144NL   | saddlebrown | 0.751  | 0.543  |
| CCDC40      | saddlebrown | 0.609  | 0.720  |
| CCR10       | saddlebrown | 0.846  | 0.529  |
| CDK2AP1     | saddlebrown | 0.764  | 0.534  |
| CDK8        | saddlebrown | -0.534 | -0.856 |

|           |             |        |        |
|-----------|-------------|--------|--------|
| COL13A1   | saddlebrown | 0.845  | 0.771  |
| COQ7      | saddlebrown | -0.947 | -0.739 |
| COX10-AS1 | saddlebrown | -0.951 | -0.867 |
| CPSF4     | saddlebrown | 0.806  | 0.923  |
| CREG1     | saddlebrown | -0.873 | -0.862 |
| CSNK2A1   | saddlebrown | -0.895 | -0.929 |
| CXCL17    | saddlebrown | 0.801  | 0.655  |
| CYP2G1P   | saddlebrown | 0.660  | 0.719  |
| DCDC2B    | saddlebrown | 0.817  | 0.844  |
| DNAJC14   | saddlebrown | -0.821 | -0.674 |
| ESR2      | saddlebrown | 0.528  | 0.708  |
| ETFA      | saddlebrown | 0.801  | 0.569  |
| FAM192A   | saddlebrown | -0.617 | -0.879 |
| FGF22     | saddlebrown | 0.883  | 0.601  |
| FLCN      | saddlebrown | 0.716  | 0.757  |
| GDE1      | saddlebrown | -0.812 | -0.884 |
| GP1BA     | saddlebrown | 0.716  | 0.839  |
| GRAMD1A   | saddlebrown | 0.602  | 0.757  |
| GTPBP5    | saddlebrown | 0.833  | 0.807  |
| GUSBP11   | saddlebrown | 0.900  | 0.938  |
| GZMM      | saddlebrown | 0.680  | 0.898  |
| HEATR4    | saddlebrown | 0.934  | 0.901  |
| HNRNPC    | saddlebrown | -0.914 | -0.403 |
| HSPB8     | saddlebrown | 0.746  | 0.851  |
| ING5      | saddlebrown | 0.807  | 0.718  |
| INHBE     | saddlebrown | 0.866  | 0.882  |
| ITGA10    | saddlebrown | 0.693  | 0.867  |
| ITGA2B    | saddlebrown | 0.642  | 0.829  |
| ITPKC     | saddlebrown | 0.914  | 0.806  |
| KHDRBS1   | saddlebrown | -0.817 | -0.655 |
| LINC00313 | saddlebrown | 0.571  | 0.711  |
| MAP3K6    | saddlebrown | 0.852  | 0.884  |
| MFSD7     | saddlebrown | 0.642  | 0.570  |
| MYCBPAP   | saddlebrown | 0.822  | 0.816  |
| MYH16     | saddlebrown | 0.919  | 0.707  |
| NAV3      | saddlebrown | -0.937 | -0.966 |
| NBPF9     | saddlebrown | 0.705  | 0.885  |
| NLRC3     | saddlebrown | 0.732  | 0.768  |
| NRD1      | saddlebrown | -0.585 | -0.653 |
| NUDT17    | saddlebrown | 0.767  | 0.746  |
| OSTF1     | saddlebrown | -0.676 | -0.789 |
| PCOLCE    | saddlebrown | 0.583  | 0.804  |
| PER1      | saddlebrown | 0.809  | 0.578  |
| PIF1      | saddlebrown | 0.756  | 0.681  |
| PKP4      | saddlebrown | -0.658 | -0.649 |
| PLEKHH3   | saddlebrown | 0.797  | 0.821  |
| PMS2P3    | saddlebrown | 0.696  | 0.522  |

|                |             |        |        |
|----------------|-------------|--------|--------|
| PTGER1         | saddlebrown | 0.805  | 0.788  |
| PTPRE          | saddlebrown | -0.712 | -0.849 |
| RAB7A          | saddlebrown | -0.642 | -0.822 |
| RAD9A          | saddlebrown | 0.830  | 0.715  |
| RBP2           | saddlebrown | 0.850  | 0.699  |
| RP11-1017G21.4 | saddlebrown | 0.784  | 0.663  |
| RP11-125K10.4  | saddlebrown | 0.910  | 0.840  |
| RP11-179G5.4   | saddlebrown | -0.656 | -0.720 |
| RP11-202H2.1   | saddlebrown | -0.662 | -0.689 |
| RP11-262D11.2  | saddlebrown | -0.712 | -0.787 |
| RP11-436I24.1  | saddlebrown | 0.838  | 0.510  |
| RP11-439E19.3  | saddlebrown | 0.775  | 0.642  |
| RP11-566K11.2  | saddlebrown | 0.884  | 0.805  |
| RP11-664D7.4   | saddlebrown | -0.895 | -0.921 |
| RP4-728D4.2    | saddlebrown | 0.809  | 0.607  |
| RP5-921G16.1   | saddlebrown | 0.548  | 0.887  |
| RPA2           | saddlebrown | -0.868 | -0.435 |
| RRS1           | saddlebrown | 0.595  | 0.716  |
| RYBP           | saddlebrown | -0.885 | -0.717 |
| S100A6         | saddlebrown | 0.920  | 0.771  |
| SCARF2         | saddlebrown | 0.650  | 0.450  |
| SCCPDH         | saddlebrown | -0.848 | -0.850 |
| SEMA3C         | saddlebrown | -0.821 | -0.742 |
| SLC13A4        | saddlebrown | 0.532  | 0.948  |
| SLC22A8        | saddlebrown | 0.768  | 0.689  |
| SMARCE1        | saddlebrown | -0.930 | -0.846 |
| SPHK1          | saddlebrown | 0.768  | 0.812  |
| ST13P4         | saddlebrown | -0.880 | -0.492 |
| STAM           | saddlebrown | -0.946 | -0.926 |
| STIM2          | saddlebrown | -0.770 | -0.704 |
| TAC4           | saddlebrown | 0.821  | 0.606  |
| TAS2R4         | saddlebrown | 0.618  | 0.783  |
| TEAD2          | saddlebrown | 0.627  | 0.709  |
| TFAP2E         | saddlebrown | 0.945  | 0.676  |
| TFCP2          | saddlebrown | -0.726 | -0.889 |
| TMEM50A        | saddlebrown | -0.719 | -0.904 |
| TMPRSS9        | saddlebrown | 0.893  | 0.781  |
| TNIP2          | saddlebrown | 0.593  | 0.853  |
| TSPYL6         | saddlebrown | 0.556  | 0.849  |
| UBE2B          | saddlebrown | -0.871 | -0.784 |
| UBE2Z          | saddlebrown | -0.898 | -0.901 |
| UGGT1          | saddlebrown | -0.799 | -0.751 |
| UIMC1          | saddlebrown | 0.869  | 0.865  |
| VASN           | saddlebrown | 0.882  | 0.871  |
| WBP2NL         | saddlebrown | 0.780  | 0.772  |
| XKR4           | saddlebrown | -0.755 | -0.616 |
| YWHAQ          | saddlebrown | -0.887 | -0.955 |



|             |             |        |        |
|-------------|-------------|--------|--------|
| ZDHC1       | saddlebrown | 0.836  | 0.741  |
| ZDHC7       | saddlebrown | -0.894 | -0.712 |
| ZFP1        | saddlebrown | -0.906 | -0.790 |
| ZNF547      | saddlebrown | 0.846  | 0.857  |
| SEPT2       | salmon      | -0.900 | -0.901 |
| ABCC8       | salmon      | 0.728  | 0.633  |
| ABCG8       | salmon      | 0.723  | 0.769  |
| AC003102.3  | salmon      | 0.731  | 0.640  |
| AC004967.8  | salmon      | -0.608 | -0.657 |
| AC005035.1  | salmon      | -0.732 | -0.712 |
| AC007283.5  | salmon      | -0.896 | -0.938 |
| AC011738.4  | salmon      | 0.580  | 0.762  |
| AC012507.3  | salmon      | 0.897  | 0.817  |
| AC018755.11 | salmon      | -0.549 | -0.850 |
| AC074117.10 | salmon      | -0.764 | -0.809 |
| AC087859.1  | salmon      | -0.918 | -0.833 |
| AF131216.6  | salmon      | -0.723 | -0.790 |
| AGPAT9      | salmon      | 0.468  | 0.859  |
| ALXE3       | salmon      | 0.746  | 0.559  |
| ANKRD42     | salmon      | 0.779  | 0.841  |
| ANXA5       | salmon      | -0.928 | -0.935 |
| ANXA6       | salmon      | 0.806  | 0.894  |
| APIP        | salmon      | -0.822 | -0.569 |
| APLN        | salmon      | -0.896 | -0.915 |
| ARG2        | salmon      | 0.563  | 0.628  |
| ARHGEF33    | salmon      | 0.501  | 0.848  |
| ARMCX5      | salmon      | 0.835  | 0.911  |
| ASCC1       | salmon      | -0.969 | -0.827 |
| ASNS        | salmon      | 0.776  | 0.866  |
| ATP5A1      | salmon      | 0.807  | 0.843  |
| ATP5B       | salmon      | 0.808  | 0.893  |
| ATP5G3      | salmon      | 0.779  | 0.876  |
| ATP6V1H     | salmon      | 0.821  | 0.966  |
| ATXN7L3     | salmon      | 0.884  | 0.892  |
| B3GNT4      | salmon      | 0.880  | 0.903  |
| BARD1       | salmon      | -0.870 | -0.828 |
| BBX         | salmon      | -0.939 | -0.764 |
| BIRC5       | salmon      | -0.763 | -0.483 |
| BLCAP       | salmon      | 0.883  | 0.895  |
| BMP2        | salmon      | -0.667 | -0.856 |
| C10orf28    | salmon      | -0.539 | -0.763 |
| C11orf65    | salmon      | -0.679 | -0.810 |
| C1orf201    | salmon      | 0.899  | 0.894  |
| C20orf3     | salmon      | 0.684  | 0.786  |
| C21orf49    | salmon      | -0.847 | -0.790 |
| C2orf47     | salmon      | 0.518  | 0.709  |
| C4orf36     | salmon      | -0.728 | -0.706 |

|               |        |        |        |
|---------------|--------|--------|--------|
| C9orf85       | salmon | -0.622 | -0.460 |
| CACNA1C       | salmon | 0.719  | 0.857  |
| CACNA1D       | salmon | 0.836  | 0.858  |
| CACNA2D3      | salmon | 0.889  | 0.945  |
| CALCOCO2      | salmon | -0.902 | -0.858 |
| CAMK1G        | salmon | 0.541  | 0.753  |
| CAMKK1        | salmon | 0.884  | 0.963  |
| CAPRIN2       | salmon | 0.770  | 0.838  |
| CARHSP1       | salmon | -0.679 | -0.887 |
| CBX7          | salmon | 0.799  | 0.923  |
| CCDC108       | salmon | 0.639  | 0.896  |
| CCNB1         | salmon | 0.794  | 0.892  |
| CCT2          | salmon | 0.779  | 0.571  |
| CCT8          | salmon | 0.690  | 0.947  |
| CDCA7L        | salmon | -0.885 | -0.815 |
| CDH18         | salmon | 0.733  | 0.923  |
| CDO1          | salmon | 0.692  | 0.925  |
| CDR2          | salmon | 0.870  | 0.941  |
| CHD1L         | salmon | -0.819 | -0.838 |
| CHD7          | salmon | -0.825 | -0.854 |
| CIT           | salmon | 0.704  | 0.729  |
| CNN2          | salmon | -0.894 | -0.738 |
| COL5A2        | salmon | 0.658  | 0.751  |
| CPNE3         | salmon | -0.912 | -0.810 |
| CRTC1         | salmon | 0.788  | 0.900  |
| CRYGD         | salmon | 0.496  | 0.751  |
| CTA-217C2.1   | salmon | 0.734  | 0.863  |
| CTD-2049J23.2 | salmon | 0.710  | 0.805  |
| CTD-2062F14.3 | salmon | 0.553  | 0.682  |
| CTD-2339L15.1 | salmon | -0.870 | -0.922 |
| CTD-2547L24.3 | salmon | 0.556  | 0.597  |
| CTD-2562J17.4 | salmon | 0.695  | 0.890  |
| CTIF          | salmon | 0.786  | 0.956  |
| CUEDC2        | salmon | 0.730  | 0.770  |
| CYB561        | salmon | 0.719  | 0.770  |
| CYP4X1        | salmon | 0.893  | 0.960  |
| DAZAP2        | salmon | -0.868 | -0.838 |
| DCTN2         | salmon | 0.819  | 0.880  |
| DGKA          | salmon | 0.839  | 0.588  |
| DIAPH1        | salmon | 0.897  | 0.815  |
| DNAH100S      | salmon | 0.655  | 0.833  |
| DNAJA2        | salmon | 0.649  | 0.846  |
| DNM3OS        | salmon | -0.629 | -0.944 |
| DOCK1         | salmon | -0.724 | -0.905 |
| DRG1          | salmon | 0.728  | 0.825  |
| DRP2          | salmon | 0.859  | 0.922  |
| E2F6          | salmon | -0.769 | -0.753 |

|           |        |        |        |
|-----------|--------|--------|--------|
| EDAR      | salmon | 0.543  | 0.395  |
| EMX1      | salmon | 0.805  | 0.927  |
| ENO4      | salmon | -0.877 | -0.847 |
| ENTPD7    | salmon | -0.873 | -0.708 |
| EPC1      | salmon | -0.767 | -0.830 |
| FADS1     | salmon | -0.955 | -0.871 |
| FAM123C   | salmon | 0.909  | 0.929  |
| FAM177A1  | salmon | -0.635 | -0.699 |
| FAM46A    | salmon | -0.602 | -0.841 |
| FAM47E    | salmon | 0.654  | 0.579  |
| FHL1      | salmon | 0.796  | 0.897  |
| FICD      | salmon | -0.554 | -0.942 |
| FOXC1     | salmon | -0.572 | -0.791 |
| FOXL2     | salmon | -0.584 | -0.589 |
| FUT1      | salmon | 0.703  | 0.692  |
| GEMIN2    | salmon | -0.734 | -0.710 |
| GGA2      | salmon | 0.727  | 0.643  |
| GLB1L3    | salmon | 0.844  | 0.796  |
| GNAL      | salmon | 0.584  | 0.615  |
| GOSR1     | salmon | -0.682 | -0.857 |
| GPR88     | salmon | 0.901  | 0.855  |
| GPSM2     | salmon | -0.900 | -0.833 |
| GTF2IRD2B | salmon | -0.917 | -0.848 |
| HABP2     | salmon | 0.521  | 0.734  |
| HAPLN4    | salmon | 0.840  | 0.931  |
| HERC5     | salmon | -0.783 | -0.858 |
| HMG20B    | salmon | -0.676 | -0.887 |
| HSD3BP4   | salmon | 0.784  | 0.401  |
| HTR3B     | salmon | 0.815  | 0.688  |
| IAH1      | salmon | 0.708  | 0.612  |
| IFIH1     | salmon | -0.892 | -0.855 |
| IGF2BP2   | salmon | -0.622 | -0.675 |
| IL1RL2    | salmon | 0.869  | 0.849  |
| ITPRIPL2  | salmon | -0.735 | -0.955 |
| KATNA1    | salmon | -0.812 | -0.884 |
| KCNAB2    | salmon | 0.939  | 0.954  |
| KCNQ1OT1  | salmon | -0.588 | -0.827 |
| KIAA0146  | salmon | 0.862  | 0.882  |
| KIAA1522  | salmon | 0.862  | 0.911  |
| KIF2B     | salmon | 0.581  | 0.946  |
| KLHL38    | salmon | 0.779  | 0.699  |
| LHFPL5    | salmon | 0.902  | 0.656  |
| LINC00240 | salmon | -0.768 | -0.421 |
| LINC00336 | salmon | 0.654  | 0.434  |
| LPXN      | salmon | -0.911 | -0.894 |
| LSM14A    | salmon | -0.922 | -0.847 |
| LYPD5     | salmon | 0.737  | 0.915  |

|           |        |        |        |
|-----------|--------|--------|--------|
| MDFIC     | salmon | -0.846 | -0.747 |
| MDH1      | salmon | 0.705  | 0.895  |
| ME3       | salmon | 0.884  | 0.963  |
| METTL16   | salmon | -0.863 | -0.814 |
| METTL24   | salmon | 0.737  | 0.691  |
| MLL3      | salmon | -0.871 | -0.900 |
| MNDA      | salmon | -0.594 | -0.839 |
| MPP1      | salmon | 0.741  | 0.912  |
| MTF1      | salmon | -0.753 | -0.899 |
| MTX2      | salmon | 0.703  | 0.823  |
| MYO15A    | salmon | 0.812  | 0.699  |
| MYO6      | salmon | -0.864 | -0.951 |
| NAA20     | salmon | 0.533  | 0.691  |
| NCDN      | salmon | 0.902  | 0.940  |
| NDUFA10   | salmon | 0.633  | 0.887  |
| NEFH      | salmon | 0.572  | 0.911  |
| NEK10     | salmon | 0.585  | 0.798  |
| NFIA      | salmon | -0.862 | -0.854 |
| NFS1      | salmon | 0.729  | 0.809  |
| NIPSNAP3B | salmon | 0.687  | 0.601  |
| NXT2      | salmon | -0.871 | -0.758 |
| OLIG1     | salmon | -0.910 | -0.569 |
| ORAI1     | salmon | -0.585 | -0.718 |
| P2RX6     | salmon | 0.793  | 0.896  |
| PCDH8     | salmon | 0.713  | 0.882  |
| PCSK5     | salmon | -0.870 | -0.772 |
| PDHA1     | salmon | 0.776  | 0.869  |
| PET112    | salmon | 0.917  | 0.705  |
| PHACTR4   | salmon | -0.841 | -0.930 |
| PHTF1     | salmon | 0.600  | 0.592  |
| PKNOX2    | salmon | 0.834  | 0.628  |
| PLEKHB1   | salmon | -0.707 | -0.660 |
| PNKD      | salmon | 0.951  | 0.917  |
| POPDC2    | salmon | -0.515 | -0.471 |
| POU6F1    | salmon | 0.948  | 0.902  |
| PPFIA4    | salmon | 0.815  | 0.944  |
| PPP1R13B  | salmon | 0.742  | 0.866  |
| PQLC3     | salmon | -0.687 | -0.859 |
| PREP      | salmon | 0.953  | 0.902  |
| PRKX      | salmon | -0.555 | -0.910 |
| PRPF19    | salmon | 0.694  | 0.865  |
| PRTG      | salmon | -0.650 | -0.636 |
| PSPC1     | salmon | 0.826  | 0.729  |
| PTH2R     | salmon | 0.889  | 0.887  |
| PTK2B     | salmon | 0.855  | 0.736  |
| PTP4A2    | salmon | -0.790 | -0.368 |
| PXDNL     | salmon | 0.580  | 0.589  |

|               |        |        |        |
|---------------|--------|--------|--------|
| RAI14         | salmon | -0.901 | -0.741 |
| RAN           | salmon | 0.636  | 0.837  |
| RCCD1         | salmon | 0.730  | 0.827  |
| RDX           | salmon | -0.936 | -0.771 |
| REST          | salmon | -0.956 | -0.970 |
| RGCC          | salmon | -0.886 | -0.722 |
| RGS2          | salmon | 0.406  | 0.765  |
| RGS7          | salmon | 0.648  | 0.903  |
| RHBDL2        | salmon | -0.825 | -0.833 |
| RIPPLY2       | salmon | 0.636  | 0.837  |
| RIT1          | salmon | -0.750 | -0.891 |
| RMND1         | salmon | 0.565  | 0.839  |
| RNF183        | salmon | -0.425 | -0.680 |
| RP11-100I7.2  | salmon | -0.861 | -0.432 |
| RP11-111E14.1 | salmon | -0.847 | -0.841 |
| RP11-142G7.2  | salmon | 0.372  | 0.461  |
| RP11-169K16.9 | salmon | -0.492 | -0.530 |
| RP11-20J15.3  | salmon | 0.923  | 0.463  |
| RP11-271E2.1  | salmon | 0.669  | 0.823  |
| RP11-317J10.2 | salmon | -0.888 | -0.743 |
| RP11-416N4.4  | salmon | 0.886  | 0.844  |
| RP11-430B1.2  | salmon | 0.912  | 0.852  |
| RP11-566K19.6 | salmon | 0.664  | 0.864  |
| RP11-596D21.1 | salmon | -0.719 | -0.720 |
| RP11-66B24.4  | salmon | 0.715  | 0.903  |
| RP11-707A18.1 | salmon | -0.440 | -0.636 |
| RP11-723O4.6  | salmon | 0.910  | 0.862  |
| RP11-752G15.3 | salmon | -0.897 | -0.619 |
| RP11-875O11.1 | salmon | 0.654  | 0.423  |
| RP1-62D2.3    | salmon | -0.752 | -0.665 |
| RP1-71L16.2   | salmon | -0.686 | -0.874 |
| RP4-742J24.2  | salmon | -0.832 | -0.923 |
| RSPRY1        | salmon | -0.757 | -0.693 |
| RUSC1         | salmon | 0.931  | 0.903  |
| S100B         | salmon | -0.792 | -0.697 |
| SCN4B         | salmon | 0.834  | 0.927  |
| SEC11A        | salmon | -0.745 | -0.908 |
| SIDT1         | salmon | 0.795  | 0.813  |
| SIPA1L1       | salmon | 0.668  | 0.934  |
| SLC25A3       | salmon | 0.620  | 0.961  |
| SLC25A4       | salmon | 0.853  | 0.901  |
| SLC26A11      | salmon | 0.405  | 0.390  |
| SLC35F2       | salmon | 0.598  | 0.468  |
| SLC6A5        | salmon | 0.393  | 0.768  |
| SMARCC1       | salmon | -0.316 | -0.724 |
| SMYD5         | salmon | 0.584  | 0.706  |
| SNAPC4        | salmon | 0.884  | 0.708  |

|             |        |        |        |
|-------------|--------|--------|--------|
| SNN         | salmon | 0.829  | 0.943  |
| SNORD115-45 | salmon | 0.684  | 0.672  |
| SNPH        | salmon | 0.890  | 0.708  |
| SP110       | salmon | -0.899 | -0.955 |
| SPAG5       | salmon | 0.751  | 0.628  |
| SPIN2A      | salmon | 0.452  | 0.707  |
| SRRM4       | salmon | 0.598  | 0.810  |
| SSTR3       | salmon | 0.846  | 0.962  |
| STAR        | salmon | 0.909  | 0.873  |
| SUGP2       | salmon | 0.732  | 0.769  |
| SYBU        | salmon | 0.965  | 0.954  |
| SYNE1       | salmon | 0.626  | 0.605  |
| TACC2       | salmon | 0.656  | 0.829  |
| TAF6        | salmon | 0.873  | 0.933  |
| TAS2R39     | salmon | -0.691 | -0.556 |
| TBCE        | salmon | 0.605  | 0.838  |
| TESPA1      | salmon | 0.700  | 0.951  |
| TGIF2       | salmon | -0.730 | -0.771 |
| TMEM179B    | salmon | -0.617 | -0.388 |
| TMEM80      | salmon | -0.854 | -0.535 |
| TMOD1       | salmon | 0.772  | 0.902  |
| TOMM34      | salmon | 0.874  | 0.958  |
| TP53TG5     | salmon | -0.879 | -0.507 |
| TPBG        | salmon | 0.696  | 0.923  |
| TPGS2       | salmon | 0.786  | 0.939  |
| TPM1        | salmon | 0.897  | 0.718  |
| TPX2        | salmon | 0.464  | 0.776  |
| TRANK1      | salmon | 0.767  | 0.826  |
| TRIM56      | salmon | -0.643 | -0.960 |
| TTC8        | salmon | 0.836  | 0.570  |
| TUBGCP4     | salmon | 0.773  | 0.905  |
| UACA        | salmon | -0.833 | -0.689 |
| UBE2T       | salmon | 0.580  | 0.881  |
| UQCRC2      | salmon | 0.642  | 0.879  |
| VDAC3       | salmon | 0.567  | 0.863  |
| VSNL1       | salmon | 0.870  | 0.946  |
| WDR16       | salmon | 0.900  | 0.908  |
| YES1        | salmon | -0.894 | -0.890 |
| ZC2HC1C     | salmon | 0.407  | 0.888  |
| ZCCHC24     | salmon | -0.789 | -0.819 |
| ZMAT4       | salmon | 0.735  | 0.890  |
| ZNF480      | salmon | -0.894 | -0.917 |
| ZNF487P     | salmon | 0.638  | 0.446  |
| ZNF652      | salmon | -0.785 | -0.859 |
| ZNF673      | salmon | 0.693  | 0.527  |
| ZNF677      | salmon | -0.706 | -0.649 |
| ZNF774      | salmon | 0.462  | 0.811  |

|            |         |        |        |
|------------|---------|--------|--------|
| ZNF812     | salmon  | -0.702 | -0.731 |
| ZNF879     | salmon  | -0.828 | -0.650 |
| A2M        | skyblue | -0.770 | -0.768 |
| ABCA17P    | skyblue | 0.774  | 0.854  |
| ABCG5      | skyblue | 0.635  | 0.937  |
| AC007639.1 | skyblue | 0.715  | 0.626  |
| AC125232.1 | skyblue | -0.662 | -0.758 |
| ACOT13     | skyblue | 0.842  | 0.734  |
| ACVR2B     | skyblue | -0.820 | -0.742 |
| ADAMDEC1   | skyblue | 0.627  | 0.853  |
| ADTRP      | skyblue | -0.792 | -0.722 |
| ALDH16A1   | skyblue | -0.625 | -0.719 |
| ANGEL1     | skyblue | -0.861 | -0.898 |
| ANKRD32    | skyblue | 0.789  | 0.903  |
| AP1S3      | skyblue | 0.807  | 0.535  |
| ARF6       | skyblue | -0.852 | -0.779 |
| ARHGEF15   | skyblue | -0.752 | -0.764 |
| ARHGEF16   | skyblue | -0.873 | -0.743 |
| ARID4A     | skyblue | 0.904  | 0.833  |
| ART4       | skyblue | 0.822  | 0.703  |
| ASTN2      | skyblue | -0.923 | -0.810 |
| ATP5J2     | skyblue | 0.842  | 0.580  |
| BCCIP      | skyblue | 0.957  | 0.904  |
| C12orf40   | skyblue | 0.648  | 0.699  |
| C14orf142  | skyblue | 0.888  | 0.714  |
| C14orf182  | skyblue | 0.707  | 0.726  |
| C14orf21   | skyblue | -0.867 | -0.887 |
| C16orf86   | skyblue | -0.709 | -0.605 |
| C1orf116   | skyblue | -0.621 | -0.843 |
| C2orf73    | skyblue | 0.755  | 0.614  |
| C3orf15    | skyblue | 0.810  | 0.914  |
| C4orf45    | skyblue | 0.923  | 0.441  |
| C6orf10    | skyblue | 0.798  | 0.855  |
| CACNA2D4   | skyblue | -0.859 | -0.613 |
| CARD11     | skyblue | -0.864 | -0.879 |
| CDC26      | skyblue | 0.838  | 0.733  |
| CMKLR1     | skyblue | -0.717 | -0.877 |
| CMPK2      | skyblue | -0.796 | -0.673 |
| CNDP2      | skyblue | -0.826 | -0.674 |
| CORO7      | skyblue | -0.888 | -0.884 |
| COX11      | skyblue | -0.610 | -0.698 |
| CTBP1-AS1  | skyblue | -0.900 | -0.940 |
| CTSK       | skyblue | -0.671 | -0.686 |
| CYB561D2   | skyblue | -0.787 | -0.593 |
| CYBASC3    | skyblue | -0.932 | -0.885 |
| DHX16      | skyblue | -0.917 | -0.681 |
| DNAJC21    | skyblue | 0.977  | 0.902  |

|               |         |        |        |
|---------------|---------|--------|--------|
| DYX1C1-CCPG1  | skyblue | 0.840  | 0.839  |
| EML2          | skyblue | -0.909 | -0.721 |
| ERCC8         | skyblue | 0.873  | 0.692  |
| FAAH          | skyblue | -0.766 | -0.480 |
| FAM210B       | skyblue | 0.945  | 0.840  |
| FBN1          | skyblue | -0.916 | -0.757 |
| FRMD8P1       | skyblue | -0.866 | -0.674 |
| GABRB1        | skyblue | 0.846  | 0.900  |
| GANAB         | skyblue | -0.877 | -0.939 |
| GCN1L1        | skyblue | -0.894 | -0.729 |
| GOLM1         | skyblue | 0.770  | 0.484  |
| GTF2E2        | skyblue | 0.746  | 0.729  |
| HERC2P9       | skyblue | -0.798 | -0.647 |
| HGSNAT        | skyblue | -0.660 | -0.787 |
| HIATL2        | skyblue | 0.842  | 0.601  |
| HLA-F-AS1     | skyblue | 0.620  | 0.734  |
| INF2          | skyblue | -0.886 | -0.893 |
| ING2          | skyblue | 0.850  | 0.617  |
| IQCJ          | skyblue | 0.876  | 0.841  |
| L3MBTL3       | skyblue | 0.882  | 0.667  |
| LETM2         | skyblue | 0.502  | 0.853  |
| LIMS2         | skyblue | -0.701 | -0.741 |
| LINC00478     | skyblue | 0.657  | 0.686  |
| LSR           | skyblue | -0.871 | -0.559 |
| MCAM          | skyblue | -0.930 | -0.707 |
| MCM3AP        | skyblue | -0.933 | -0.910 |
| MEGF6         | skyblue | -0.895 | -0.792 |
| METTL3        | skyblue | -0.914 | -0.519 |
| MIPOL1        | skyblue | 0.798  | 0.921  |
| MIR137HG      | skyblue | 0.682  | 0.758  |
| MPPE1         | skyblue | -0.812 | -0.672 |
| MRPS6         | skyblue | 0.841  | 0.725  |
| MTO1          | skyblue | -0.791 | -0.647 |
| NKAIN3        | skyblue | 0.769  | 0.850  |
| NRG4          | skyblue | 0.859  | 0.755  |
| NSUN5         | skyblue | -0.832 | -0.702 |
| NTM           | skyblue | 0.637  | 0.486  |
| PACS2         | skyblue | -0.856 | -0.762 |
| PDSS1         | skyblue | 0.597  | 0.773  |
| PSMG2         | skyblue | 0.819  | 0.815  |
| PTPRQ         | skyblue | 0.770  | 0.698  |
| PYROXD1       | skyblue | -0.721 | -0.664 |
| RAB11FIP1     | skyblue | 0.835  | 0.875  |
| RCN1P2        | skyblue | 0.801  | 0.696  |
| RDM1          | skyblue | 0.743  | 0.638  |
| RIOK1         | skyblue | 0.831  | 0.515  |
| RP11-181B11.2 | skyblue | 0.886  | 0.909  |



|               |           |        |        |
|---------------|-----------|--------|--------|
| RP11-32K4.2   | skyblue   | 0.839  | 0.523  |
| RP11-452K12.7 | skyblue   | 0.746  | 0.862  |
| RP11-468E2.9  | skyblue   | 0.633  | 0.545  |
| RP11-499P20.2 | skyblue   | 0.705  | 0.837  |
| RP11-4K16.2   | skyblue   | 0.852  | 0.848  |
| RP11-620J15.3 | skyblue   | 0.835  | 0.636  |
| RP11-711G10.1 | skyblue   | 0.850  | 0.815  |
| RP11-84G21.1  | skyblue   | 0.719  | 0.802  |
| RP3-486L4.3   | skyblue   | 0.834  | 0.934  |
| RP4-726N20.2  | skyblue   | 0.778  | 0.790  |
| RP5-848E13.3  | skyblue   | 0.751  | 0.876  |
| RPF2          | skyblue   | 0.776  | 0.914  |
| SCARB1        | skyblue   | -0.792 | -0.791 |
| SLC34A2       | skyblue   | 0.830  | 0.593  |
| SLC38A5       | skyblue   | -0.905 | -0.771 |
| SMARCAL1      | skyblue   | -0.816 | -0.556 |
| SPAG17        | skyblue   | 0.775  | 0.807  |
| SPNS2         | skyblue   | -0.787 | -0.715 |
| SPOP          | skyblue   | 0.832  | 0.772  |
| SPRY1         | skyblue   | 0.887  | 0.789  |
| STARD9        | skyblue   | -0.964 | -0.828 |
| SZT2          | skyblue   | -0.920 | -0.761 |
| TAF12         | skyblue   | 0.835  | 0.537  |
| TMEM173       | skyblue   | -0.865 | -0.604 |
| TMEM67        | skyblue   | 0.639  | 0.736  |
| TOP1          | skyblue   | 0.902  | 0.925  |
| UPF2          | skyblue   | 0.807  | 0.816  |
| UPF3B         | skyblue   | 0.860  | 0.929  |
| VAT1          | skyblue   | -0.892 | -0.861 |
| VWA2          | skyblue   | -0.778 | -0.821 |
| WDR67         | skyblue   | 0.799  | 0.670  |
| WDR91         | skyblue   | -0.900 | -0.841 |
| WDR96         | skyblue   | 0.894  | 0.920  |
| WIPF2         | skyblue   | 0.975  | 0.896  |
| ZC3H8         | skyblue   | 0.840  | 0.946  |
| ZNF132        | skyblue   | -0.959 | -0.653 |
| ZNF732        | skyblue   | 0.964  | 0.824  |
| MARCH6        | turquoise | 0.789  | 0.748  |
| MARCH7        | turquoise | 0.825  | 0.750  |
| SEPT1         | turquoise | -0.822 | -0.506 |
| AASDHPPT      | turquoise | 0.692  | 0.845  |
| ABCA5         | turquoise | 0.793  | 0.859  |
| ABCB9         | turquoise | -0.909 | -0.788 |
| ABCC3         | turquoise | -0.628 | -0.635 |
| ABCC6         | turquoise | -0.707 | -0.719 |
| ABCE1         | turquoise | 0.856  | 0.550  |
| ABCG2         | turquoise | 0.550  | 0.556  |

|             |           |        |        |
|-------------|-----------|--------|--------|
| ABHD10      | turquoise | 0.656  | 0.803  |
| ABHD13      | turquoise | 0.622  | 0.551  |
| ABHD14B     | turquoise | -0.888 | -0.829 |
| ABHD2       | turquoise | 0.805  | 0.535  |
| ABI2        | turquoise | 0.949  | 0.622  |
| AC004041.2  | turquoise | -0.493 | -0.502 |
| AC004166.7  | turquoise | -0.597 | -0.721 |
| AC004893.11 | turquoise | -0.522 | -0.514 |
| AC004951.6  | turquoise | -0.511 | -0.879 |
| AC004985.12 | turquoise | -0.746 | -0.540 |
| AC005237.4  | turquoise | -0.652 | -0.480 |
| AC005895.3  | turquoise | -0.459 | -0.855 |
| AC006276.7  | turquoise | -0.780 | -0.861 |
| AC006277.2  | turquoise | -0.538 | -0.387 |
| AC006465.3  | turquoise | 0.799  | 0.728  |
| AC006547.13 | turquoise | -0.747 | -0.924 |
| AC006978.6  | turquoise | -0.849 | -0.879 |
| AC007276.5  | turquoise | 0.433  | 0.309  |
| AC008697.1  | turquoise | 0.504  | 0.561  |
| AC008746.3  | turquoise | -0.656 | -0.676 |
| AC009948.5  | turquoise | 0.575  | 0.783  |
| AC010127.4  | turquoise | 0.731  | 0.608  |
| AC011450.1  | turquoise | -0.772 | -0.754 |
| AC012314.8  | turquoise | -0.709 | -0.661 |
| AC012442.5  | turquoise | -0.514 | -0.580 |
| AC018737.1  | turquoise | -0.219 | -0.557 |
| AC022498.1  | turquoise | -0.663 | -0.794 |
| AC022532.1  | turquoise | -0.833 | -0.701 |
| AC034193.5  | turquoise | -0.757 | -0.399 |
| AC069513.3  | turquoise | -0.935 | -0.542 |
| AC074286.1  | turquoise | 0.823  | 0.653  |
| AC078802.1  | turquoise | 0.751  | 0.613  |
| AC079341.1  | turquoise | 0.597  | 0.920  |
| AC083884.8  | turquoise | -0.659 | -0.633 |
| AC092295.4  | turquoise | -0.587 | -0.571 |
| AC092296.2  | turquoise | 0.849  | 0.685  |
| AC092619.1  | turquoise | -0.422 | -0.609 |
| AC093495.4  | turquoise | -0.465 | -0.881 |
| AC097662.2  | turquoise | 0.587  | 0.667  |
| AC103810.2  | turquoise | -0.845 | -0.614 |
| AC109586.1  | turquoise | -0.628 | -0.516 |
| AC110619.1  | turquoise | 0.678  | 0.545  |
| AC115618.1  | turquoise | -0.590 | -0.698 |
| AC159540.1  | turquoise | -0.498 | -0.387 |
| ACAA1       | turquoise | -0.743 | -0.651 |
| ACAD10      | turquoise | -0.889 | -0.647 |
| ACADSB      | turquoise | 0.927  | 0.893  |

|          |           |        |        |
|----------|-----------|--------|--------|
| ACADVL   | turquoise | -0.947 | -0.913 |
| ACIN1    | turquoise | -0.797 | -0.783 |
| ACOT2    | turquoise | -0.691 | -0.664 |
| ACP1     | turquoise | 0.662  | 0.794  |
| ACPL2    | turquoise | 0.278  | 0.705  |
| ACPT     | turquoise | -0.757 | -0.298 |
| ACR      | turquoise | -0.493 | -0.647 |
| ACSL3    | turquoise | 0.801  | 0.687  |
| ACSL4    | turquoise | 0.975  | 0.954  |
| ACTN3    | turquoise | -0.680 | -0.499 |
| ACTR10   | turquoise | 0.795  | 0.881  |
| ACTR2    | turquoise | 0.861  | 0.926  |
| ACTR3    | turquoise | 0.799  | 0.907  |
| ACTR6    | turquoise | 0.848  | 0.636  |
| ACTR8    | turquoise | 0.831  | 0.461  |
| ACVR1C   | turquoise | 0.876  | 0.890  |
| ACVR2A   | turquoise | 0.802  | 0.509  |
| ACY1     | turquoise | -0.637 | -0.480 |
| ADAM22   | turquoise | 0.910  | 0.980  |
| ADAM9    | turquoise | 0.905  | 0.773  |
| ADAMTS5  | turquoise | 0.825  | 0.528  |
| ADAMTSL5 | turquoise | -0.623 | -0.743 |
| ADAP1    | turquoise | -0.806 | -0.527 |
| ADAR     | turquoise | 0.624  | 0.874  |
| ADAT2    | turquoise | 0.699  | 0.674  |
| ADAT3    | turquoise | -0.402 | -0.846 |
| ADD2     | turquoise | 0.769  | 0.951  |
| ADO      | turquoise | 0.882  | 0.857  |
| ADRBK2   | turquoise | 0.946  | 0.956  |
| ADSS     | turquoise | 0.864  | 0.934  |
| AFAP1    | turquoise | 0.739  | 0.715  |
| AFF3     | turquoise | 0.858  | 0.845  |
| AFTPH    | turquoise | 0.700  | 0.439  |
| AGAP6    | turquoise | -0.711 | -0.487 |
| AGFG1    | turquoise | 0.789  | 0.812  |
| AGFG2    | turquoise | -0.543 | -0.661 |
| AGK      | turquoise | 0.318  | 0.846  |
| AGPAT3   | turquoise | 0.310  | 0.569  |
| AGPS     | turquoise | 0.914  | 0.911  |
| AGRP     | turquoise | -0.508 | -0.005 |
| AGTPBP1  | turquoise | 0.885  | 0.974  |
| AGXT2L2  | turquoise | -0.779 | -0.809 |
| AIFM2    | turquoise | -0.782 | -0.739 |
| AIMP2    | turquoise | -0.389 | -0.599 |
| AIPL1    | turquoise | -0.506 | -0.450 |
| AK1      | turquoise | -0.617 | -0.937 |
| AKAP10   | turquoise | 0.911  | 0.921  |

|             |           |        |        |
|-------------|-----------|--------|--------|
| AKAP11      | turquoise | 0.960  | 0.961  |
| AKAP6       | turquoise | 0.784  | 0.979  |
| AKAP8L      | turquoise | -0.844 | -0.757 |
| AKR7A2      | turquoise | -0.756 | -0.657 |
| AKR7A2P1    | turquoise | -0.783 | -0.359 |
| AKT3        | turquoise | 0.891  | 0.968  |
| AL450992.2  | turquoise | 0.741  | 0.898  |
| ALDH1A2     | turquoise | 0.755  | 0.788  |
| ALDH2       | turquoise | -0.489 | -0.819 |
| ALDH3A2     | turquoise | 0.437  | 0.630  |
| ALDOC       | turquoise | -0.888 | -0.648 |
| ALG10       | turquoise | 0.822  | 0.619  |
| ALG10B      | turquoise | 0.896  | 0.535  |
| ALG13       | turquoise | 0.423  | 0.837  |
| ALKBH2      | turquoise | -0.641 | -0.706 |
| ALKBH8      | turquoise | 0.697  | 0.772  |
| ALOX12      | turquoise | -0.748 | -0.806 |
| ALS2        | turquoise | 0.866  | 0.902  |
| ALS2CR8     | turquoise | 0.819  | 0.620  |
| AMD1        | turquoise | 0.971  | 0.931  |
| AMIGO1      | turquoise | 0.467  | 0.844  |
| AMN1        | turquoise | 0.836  | 0.946  |
| AMOTL1      | turquoise | 0.918  | 0.482  |
| AMT         | turquoise | -0.921 | -0.588 |
| ANAPC1      | turquoise | 0.827  | 0.966  |
| ANK2        | turquoise | 0.800  | 0.918  |
| ANK3        | turquoise | 0.861  | 0.939  |
| ANKDD1A     | turquoise | -0.614 | -0.759 |
| ANKK1       | turquoise | -0.566 | -0.588 |
| ANKLE2      | turquoise | 0.273  | 0.597  |
| ANKMY2      | turquoise | 0.776  | 0.919  |
| ANKRD13C    | turquoise | 0.919  | 0.937  |
| ANKRD28     | turquoise | 0.747  | 0.890  |
| ANKRD34B    | turquoise | 0.743  | 0.769  |
| ANKRD35     | turquoise | -0.772 | -0.613 |
| ANKRD36B    | turquoise | -0.466 | -0.832 |
| ANKRD39     | turquoise | -0.862 | -0.790 |
| ANKRD45     | turquoise | 0.702  | 0.320  |
| ANKRD46     | turquoise | 0.747  | 0.860  |
| ANKRD5      | turquoise | 0.650  | 0.599  |
| ANKRD50     | turquoise | 0.903  | 0.975  |
| ANO5        | turquoise | 0.782  | 0.688  |
| ANXA2P3     | turquoise | -0.562 | -0.703 |
| ANXA2R      | turquoise | -0.360 | -0.652 |
| AP001432.14 | turquoise | 0.687  | 0.556  |
| AP1AR       | turquoise | 0.844  | 0.972  |
| AP1G1       | turquoise | 0.939  | 0.883  |

|           |           |        |        |
|-----------|-----------|--------|--------|
| AP1S2     | turquoise | 0.732  | 0.878  |
| AP2B1     | turquoise | 0.718  | 0.906  |
| AP3M2     | turquoise | 0.672  | 0.930  |
| AP4M1     | turquoise | -0.881 | -0.652 |
| AP4S1     | turquoise | 0.673  | 0.799  |
| AP5M1     | turquoise | 0.927  | 0.941  |
| AP5S1     | turquoise | -0.721 | -0.687 |
| API5      | turquoise | 0.957  | 0.948  |
| APOBEC3F  | turquoise | -0.653 | -0.680 |
| APOL2     | turquoise | -0.415 | -0.548 |
| APOOL     | turquoise | 0.874  | 0.828  |
| APOPT1    | turquoise | -0.670 | -0.813 |
| APPBP2    | turquoise | 0.925  | 0.846  |
| APPL1     | turquoise | 0.931  | 0.939  |
| AQP5      | turquoise | -0.451 | -0.790 |
| AQP7P1    | turquoise | -0.815 | -0.137 |
| ARCN1     | turquoise | 0.823  | 0.831  |
| ARFGEF1   | turquoise | 0.961  | 0.864  |
| ARFGEF2   | turquoise | 0.818  | 0.955  |
| ARHGAP11A | turquoise | 0.577  | 0.635  |
| ARHGAP21  | turquoise | 0.713  | 0.884  |
| ARHGAP26  | turquoise | 0.781  | 0.823  |
| ARHGAP8   | turquoise | -0.363 | -0.109 |
| ARHGEF7   | turquoise | 0.780  | 0.944  |
| ARID3A    | turquoise | -0.722 | -0.938 |
| ARIH1     | turquoise | 0.975  | 0.784  |
| ARL1      | turquoise | 0.918  | 0.953  |
| ARL10     | turquoise | 0.625  | 0.442  |
| ARL15     | turquoise | 0.241  | 0.871  |
| ARL6      | turquoise | 0.769  | 0.944  |
| ARL6IP4   | turquoise | -0.890 | -0.775 |
| ARL8B     | turquoise | 0.693  | 0.970  |
| ARMC12    | turquoise | -0.801 | -0.784 |
| ARMCX3    | turquoise | 0.860  | 0.752  |
| ARNTL2    | turquoise | 0.596  | 0.791  |
| ARPC1B    | turquoise | -0.449 | -0.721 |
| ARPC5     | turquoise | 0.768  | 0.649  |
| ARPP19    | turquoise | 0.744  | 0.860  |
| ARRDC1    | turquoise | -0.814 | -0.674 |
| ARSK      | turquoise | 0.678  | 0.719  |
| ART3      | turquoise | 0.484  | 0.672  |
| AS3MT     | turquoise | -0.483 | -0.675 |
| ASAH2B    | turquoise | 0.859  | 0.957  |
| ASB7      | turquoise | 0.766  | 0.734  |
| ASB9      | turquoise | 0.388  | 0.156  |
| ASB9P1    | turquoise | -0.694 | -0.354 |
| ASCC2     | turquoise | -0.816 | -0.865 |

|          |           |        |        |
|----------|-----------|--------|--------|
| ASCL1    | turquoise | -0.571 | -0.442 |
| ASH1L    | turquoise | 0.838  | 0.643  |
| ASH2L    | turquoise | 0.805  | 0.881  |
| ASIC3    | turquoise | -0.778 | -0.671 |
| ASPRV1   | turquoise | -0.442 | -0.477 |
| ATAD1    | turquoise | 0.883  | 0.960  |
| ATAD3A   | turquoise | -0.841 | -0.407 |
| ATE1     | turquoise | 0.884  | 0.980  |
| ATF2     | turquoise | 0.846  | 0.954  |
| ATF6B    | turquoise | -0.600 | -0.889 |
| ATG2B    | turquoise | 0.926  | 0.954  |
| ATG5     | turquoise | 0.716  | 0.832  |
| ATG9B    | turquoise | -0.869 | -0.650 |
| ATL2     | turquoise | 0.849  | 0.704  |
| ATMIN    | turquoise | 0.898  | 0.978  |
| ATP11B   | turquoise | 0.962  | 0.773  |
| ATP1A4   | turquoise | -0.871 | -0.505 |
| ATP2A1   | turquoise | -0.787 | -0.764 |
| ATP2B1   | turquoise | 0.617  | 0.743  |
| ATP2C1   | turquoise | 0.874  | 0.892  |
| ATP5L2   | turquoise | -0.357 | -0.729 |
| ATP5O    | turquoise | 0.547  | 0.363  |
| ATP6VOA1 | turquoise | 0.459  | 0.874  |
| ATP6V1A  | turquoise | 0.845  | 0.983  |
| ATP6V1C1 | turquoise | 0.847  | 0.943  |
| ATP8A1   | turquoise | 0.886  | 0.952  |
| ATP8A2   | turquoise | 0.762  | 0.903  |
| ATP9A    | turquoise | 0.687  | 0.954  |
| ATPAF1   | turquoise | 0.596  | 0.754  |
| ATPAF2   | turquoise | -0.936 | -0.313 |
| ATR      | turquoise | 0.821  | 0.920  |
| ATRIP    | turquoise | -0.608 | -0.772 |
| ATRN     | turquoise | 0.845  | 0.957  |
| ATXN1    | turquoise | 0.769  | 0.908  |
| ATXN7L3B | turquoise | 0.856  | 0.946  |
| AUP1     | turquoise | -0.928 | -0.826 |
| AURKAIP1 | turquoise | -0.657 | -0.639 |
| AVEN     | turquoise | -0.557 | -0.603 |
| AVL9     | turquoise | 0.888  | 0.905  |
| AXIN1    | turquoise | -0.886 | -0.447 |
| AZI1     | turquoise | -0.945 | -0.359 |
| AZI2     | turquoise | 0.850  | 0.827  |
| AZIN1    | turquoise | 0.987  | 0.911  |
| B3GALNT1 | turquoise | 0.871  | 0.954  |
| B3GALT2  | turquoise | 0.811  | 0.907  |
| B3GNT2   | turquoise | 0.862  | 0.624  |
| B4GALNT4 | turquoise | -0.803 | -0.619 |

|           |           |        |        |
|-----------|-----------|--------|--------|
| B4GALT5   | turquoise | 0.765  | 0.972  |
| B4GALT6   | turquoise | 0.855  | 0.906  |
| BAG4      | turquoise | 0.865  | 0.894  |
| BAG5      | turquoise | 0.840  | 0.862  |
| BAIAP2L2  | turquoise | -0.469 | -0.535 |
| BANK1     | turquoise | 0.707  | 0.310  |
| BBS10     | turquoise | 0.717  | 0.858  |
| BBS5      | turquoise | -0.892 | -0.572 |
| BBS7      | turquoise | 0.914  | 0.975  |
| BCAP29    | turquoise | 0.665  | 0.890  |
| BCAT1     | turquoise | 0.890  | 0.893  |
| BCAT2     | turquoise | -0.884 | -0.719 |
| BCL2L13   | turquoise | 0.798  | 0.535  |
| BCL3      | turquoise | -0.623 | -0.570 |
| BCRP3     | turquoise | -0.591 | -0.273 |
| BEND4     | turquoise | 0.816  | 0.910  |
| BHLHB9    | turquoise | 0.956  | 0.958  |
| BHMT2     | turquoise | -0.498 | -0.507 |
| BICD1     | turquoise | 0.910  | 0.748  |
| BIRC2     | turquoise | 0.847  | 0.722  |
| BLOC1S2   | turquoise | 0.680  | 0.807  |
| BMI1      | turquoise | 0.951  | 0.936  |
| BMP1      | turquoise | -0.750 | -0.594 |
| BMPR2     | turquoise | 0.947  | 0.919  |
| BNIP3L    | turquoise | 0.819  | 0.957  |
| BRAF      | turquoise | 0.924  | 0.884  |
| BRD4      | turquoise | -0.822 | -0.814 |
| BRMS1     | turquoise | -0.707 | -0.840 |
| BRMS1L    | turquoise | 0.834  | 0.910  |
| BRWD1     | turquoise | 0.755  | 0.743  |
| BRWD1-AS1 | turquoise | -0.464 | -0.775 |
| BSG       | turquoise | -0.818 | -0.620 |
| BTBD1     | turquoise | 0.965  | 0.926  |
| BTBD11    | turquoise | 0.461  | 0.614  |
| BTBD3     | turquoise | 0.675  | 0.949  |
| BTF3L4    | turquoise | 0.794  | 0.955  |
| BVES-AS1  | turquoise | 0.424  | 0.587  |
| BZW1      | turquoise | 0.941  | 0.745  |
| C10orf107 | turquoise | 0.378  | 0.584  |
| C10orf108 | turquoise | -0.777 | -0.765 |
| C10orf116 | turquoise | -0.636 | -0.665 |
| C10orf2   | turquoise | -0.739 | -0.511 |
| C10orf32  | turquoise | -0.713 | -0.279 |
| C10orf46  | turquoise | 0.822  | 0.842  |
| C10orf76  | turquoise | 0.577  | 0.557  |
| C10orf82  | turquoise | 0.596  | 0.485  |
| C10orf88  | turquoise | 0.816  | 0.954  |

|           |           |        |        |
|-----------|-----------|--------|--------|
| C11orf1   | turquoise | -0.593 | -0.684 |
| C11orf45  | turquoise | 0.415  | 0.859  |
| C11orf51  | turquoise | -0.300 | -0.633 |
| C11orf75  | turquoise | -0.532 | -0.503 |
| C11orf82  | turquoise | 0.684  | 0.566  |
| C12orf23  | turquoise | 0.861  | 0.631  |
| C12orf29  | turquoise | 0.599  | 0.697  |
| C12orf4   | turquoise | 0.895  | 0.957  |
| C12orf5   | turquoise | 0.777  | 0.792  |
| C12orf51  | turquoise | 0.562  | 0.946  |
| C12orf54  | turquoise | -0.467 | -0.420 |
| C14orf159 | turquoise | -0.863 | -0.542 |
| C14orf55  | turquoise | -0.644 | -0.722 |
| C15orf61  | turquoise | 0.610  | 0.642  |
| C15orf63  | turquoise | -0.545 | -0.868 |
| C16orf48  | turquoise | -0.645 | -0.785 |
| C16orf52  | turquoise | 0.633  | 0.706  |
| C16orf72  | turquoise | 0.837  | 0.533  |
| C16orf96  | turquoise | -0.670 | -0.659 |
| C17orf104 | turquoise | 0.830  | 0.765  |
| C17orf50  | turquoise | -0.521 | -0.775 |
| C17orf53  | turquoise | -0.697 | -0.868 |
| C18orf1   | turquoise | 0.817  | 0.934  |
| C19orf12  | turquoise | 0.598  | 0.797  |
| C19orf24  | turquoise | -0.729 | -0.451 |
| C19orf25  | turquoise | -0.604 | -0.756 |
| C19orf29  | turquoise | -0.773 | -0.631 |
| C19orf43  | turquoise | -0.627 | -0.464 |
| C19orf46  | turquoise | -0.653 | -0.806 |
| C19orf60  | turquoise | -0.702 | -0.501 |
| C19orf79  | turquoise | -0.547 | -0.085 |
| C19orf81  | turquoise | -0.740 | -0.182 |
| C1GALT1C1 | turquoise | 0.782  | 0.799  |
| C1orf133  | turquoise | 0.548  | 0.501  |
| C1orf192  | turquoise | 0.938  | 0.888  |
| C1orf200  | turquoise | -0.570 | -0.575 |
| C1orf213  | turquoise | -0.730 | -0.525 |
| C1orf228  | turquoise | -0.814 | -0.822 |
| C1orf35   | turquoise | -0.825 | -0.870 |
| C1orf43   | turquoise | 0.692  | 0.688  |
| C1orf54   | turquoise | -0.572 | -0.846 |
| C1orf85   | turquoise | 0.352  | 0.417  |
| C1orf86   | turquoise | -0.777 | -0.702 |
| C1orf96   | turquoise | 0.830  | 0.951  |
| C1R       | turquoise | -0.586 | -0.680 |
| C1RL      | turquoise | -0.819 | -0.580 |
| C2        | turquoise | -0.516 | -0.319 |



|             |           |        |        |
|-------------|-----------|--------|--------|
| C20orf11    | turquoise | 0.542  | 0.827  |
| C20orf20    | turquoise | -0.802 | -0.673 |
| C20orf202   | turquoise | 0.440  | 0.770  |
| C20orf7     | turquoise | 0.440  | 0.869  |
| C21orf77    | turquoise | -0.704 | -0.554 |
| C21orf88    | turquoise | -0.652 | -0.586 |
| C2orf16     | turquoise | 0.901  | 0.818  |
| C2orf42     | turquoise | 0.666  | 0.510  |
| C2orf62     | turquoise | -0.755 | -0.801 |
| C3orf43     | turquoise | -0.840 | -0.297 |
| C3orf49     | turquoise | 0.736  | 0.722  |
| C3P1        | turquoise | -0.667 | -0.493 |
| C4orf33     | turquoise | 0.873  | 0.873  |
| C4orf34     | turquoise | 0.563  | 0.500  |
| C4orf48     | turquoise | -0.431 | -0.465 |
| C5orf22     | turquoise | 0.897  | 0.983  |
| C5orf24     | turquoise | 0.907  | 0.770  |
| C5orf30     | turquoise | 0.630  | 0.812  |
| C5orf44     | turquoise | 0.965  | 0.933  |
| C5orf49     | turquoise | -0.609 | -0.497 |
| C6orf108    | turquoise | -0.893 | -0.681 |
| C6orf120    | turquoise | 0.878  | 0.921  |
| C6orf130    | turquoise | 0.713  | 0.448  |
| C6orf211    | turquoise | 0.804  | 0.877  |
| C6orf226    | turquoise | -0.568 | -0.376 |
| C6orf228    | turquoise | 0.956  | 0.975  |
| C6orf89     | turquoise | 0.868  | 0.779  |
| C6orf99     | turquoise | -0.824 | -0.818 |
| C7orf13     | turquoise | 0.450  | 0.521  |
| C7orf23     | turquoise | -0.414 | -0.382 |
| C7orf44     | turquoise | 0.638  | 0.787  |
| C7orf60     | turquoise | 0.688  | 0.855  |
| C8orf38     | turquoise | 0.740  | 0.782  |
| C8orf58     | turquoise | -0.573 | -0.706 |
| C8orf73     | turquoise | -0.774 | -0.438 |
| C9orf114    | turquoise | -0.797 | -0.655 |
| C9orf125    | turquoise | 0.654  | 0.845  |
| C9orf131    | turquoise | -0.732 | -0.631 |
| C9orf41     | turquoise | 0.707  | 0.672  |
| C9orf72     | turquoise | 0.892  | 0.722  |
| C9orf80     | turquoise | 0.802  | 0.595  |
| C9orf89     | turquoise | -0.892 | -0.756 |
| CA3         | turquoise | -0.742 | -0.633 |
| CA8         | turquoise | 0.391  | 0.365  |
| CA9         | turquoise | -0.508 | -0.501 |
| CAB39       | turquoise | 0.874  | 0.969  |
| CACNA1C-IT3 | turquoise | -0.441 | -0.656 |

|          |           |        |        |
|----------|-----------|--------|--------|
| CACNA2D1 | turquoise | 0.838  | 0.935  |
| CACNB4   | turquoise | 0.927  | 0.910  |
| CADM2    | turquoise | 0.916  | 0.887  |
| CALML4   | turquoise | -0.282 | -0.326 |
| CALML6   | turquoise | -0.574 | -0.696 |
| CALN1    | turquoise | 0.839  | 0.749  |
| CAMK2D   | turquoise | 0.850  | 0.932  |
| CAMSAP1  | turquoise | 0.672  | 0.921  |
| CAMSAP2  | turquoise | 0.956  | 0.862  |
| CAND1    | turquoise | 0.954  | 0.980  |
| CAPN14   | turquoise | -0.658 | -0.364 |
| CAPRIN1  | turquoise | 0.786  | 0.954  |
| CAPS2    | turquoise | 0.875  | 0.730  |
| CAPZA1   | turquoise | 0.726  | 0.491  |
| CAPZA2   | turquoise | 0.911  | 0.786  |
| CARS2    | turquoise | -0.958 | -0.578 |
| CASD1    | turquoise | 0.813  | 0.982  |
| CASK     | turquoise | 0.825  | 0.842  |
| CATSPERG | turquoise | -0.619 | -0.689 |
| CAV3     | turquoise | -0.393 | -0.652 |
| CBL      | turquoise | 0.840  | 0.703  |
| CBR3     | turquoise | -0.591 | -0.628 |
| CBR3-AS1 | turquoise | -0.519 | -0.866 |
| CBR4     | turquoise | 0.750  | 0.571  |
| CBWD2    | turquoise | 0.814  | 0.546  |
| CBX5     | turquoise | 0.805  | 0.886  |
| CBY3     | turquoise | -0.694 | -0.800 |
| CC2D1A   | turquoise | -0.699 | -0.835 |
| CCBE1    | turquoise | 0.658  | 0.464  |
| CCDC101  | turquoise | -0.808 | -0.885 |
| CCDC102A | turquoise | -0.636 | -0.586 |
| CCDC11   | turquoise | -0.658 | -0.807 |
| CCDC12   | turquoise | -0.908 | -0.581 |
| CCDC120  | turquoise | -0.545 | -0.658 |
| CCDC132  | turquoise | 0.773  | 0.901  |
| CCDC142  | turquoise | -0.897 | -0.925 |
| CCDC149  | turquoise | 0.858  | 0.820  |
| CCDC153  | turquoise | -0.495 | -0.486 |
| CCDC154  | turquoise | -0.662 | -0.736 |
| CCDC24   | turquoise | -0.817 | -0.715 |
| CCDC37   | turquoise | -0.687 | -0.611 |
| CCDC6    | turquoise | 0.954  | 0.950  |
| CCDC60   | turquoise | -0.684 | -0.795 |
| CCDC88B  | turquoise | -0.733 | -0.463 |
| CCDC9    | turquoise | -0.759 | -0.847 |
| CCDC90B  | turquoise | 0.897  | 0.584  |
| CCDC94   | turquoise | -0.879 | -0.525 |

|           |           |        |        |
|-----------|-----------|--------|--------|
| CCNG2     | turquoise | 0.445  | 0.837  |
| CCNH      | turquoise | 0.614  | 0.896  |
| CCNT2     | turquoise | 0.867  | 0.873  |
| CCS       | turquoise | -0.964 | -0.559 |
| CD151     | turquoise | -0.698 | -0.691 |
| CD276     | turquoise | -0.745 | -0.689 |
| CD40      | turquoise | -0.699 | -0.613 |
| CD47      | turquoise | 0.935  | 0.985  |
| CDADC1    | turquoise | 0.743  | 0.816  |
| CDC27     | turquoise | 0.947  | 0.888  |
| CDC42     | turquoise | 0.829  | 0.642  |
| CDC42SE2  | turquoise | 0.931  | 0.933  |
| CDC45     | turquoise | -0.646 | -0.823 |
| CDCA8     | turquoise | -0.867 | -0.758 |
| CDH10     | turquoise | 0.682  | 0.862  |
| CDH16     | turquoise | -0.734 | -0.548 |
| CDH3      | turquoise | -0.837 | -0.422 |
| CDH4      | turquoise | -0.494 | -0.484 |
| CDH6      | turquoise | 0.694  | 0.861  |
| CDH7      | turquoise | 0.804  | 0.868  |
| CDH9      | turquoise | 0.569  | 0.731  |
| CDHR1     | turquoise | 0.500  | 0.396  |
| CDK1      | turquoise | 0.677  | 0.430  |
| CDK11A    | turquoise | -0.501 | -0.891 |
| CDK17     | turquoise | 0.964  | 0.979  |
| CDK2AP2   | turquoise | -0.671 | -0.812 |
| CDK3      | turquoise | -0.639 | -0.642 |
| CDK5RAP3  | turquoise | -0.671 | -0.282 |
| CDKL2     | turquoise | 0.886  | 0.709  |
| CDKL5     | turquoise | 0.938  | 0.764  |
| CDKN1B    | turquoise | 0.872  | 0.816  |
| CDS2      | turquoise | 0.671  | 0.921  |
| CEACAM1   | turquoise | -0.767 | -0.859 |
| CEACAM8   | turquoise | -0.761 | -0.747 |
| CECR5-AS1 | turquoise | -0.835 | -0.420 |
| CEL       | turquoise | -0.697 | -0.698 |
| CELA2B    | turquoise | -0.631 | -0.822 |
| CENPN     | turquoise | 0.937  | 0.803  |
| CENPT     | turquoise | -0.837 | -0.702 |
| CEP120    | turquoise | 0.769  | 0.832  |
| CEP164    | turquoise | -0.764 | -0.623 |
| CEP170    | turquoise | 0.932  | 0.973  |
| CEP192    | turquoise | 0.808  | 0.700  |
| CEP41     | turquoise | 0.963  | 0.747  |
| CEP68     | turquoise | 0.768  | 0.806  |
| CEP89     | turquoise | -0.572 | -0.932 |
| CERKL     | turquoise | 0.263  | 0.452  |

|         |           |        |        |
|---------|-----------|--------|--------|
| CERS1   | turquoise | -0.933 | -0.893 |
| CERS5   | turquoise | -0.779 | -0.850 |
| CES4A   | turquoise | -0.700 | -0.439 |
| CFD     | turquoise | -0.547 | -0.651 |
| CFP     | turquoise | -0.837 | -0.870 |
| CGGBP1  | turquoise | 0.964  | 0.947  |
| CHAF1B  | turquoise | 0.511  | 0.847  |
| CHCHD7  | turquoise | 0.487  | 0.861  |
| CHFR    | turquoise | -0.916 | -0.762 |
| CHIC1   | turquoise | 0.964  | 0.979  |
| CHKB    | turquoise | -0.709 | -0.800 |
| CHM     | turquoise | 0.965  | 0.973  |
| CHML    | turquoise | 0.956  | 0.831  |
| CHRD12  | turquoise | -0.618 | -0.516 |
| CHRM3   | turquoise | 0.787  | 0.941  |
| CHRNA10 | turquoise | -0.759 | -0.752 |
| CHRN3   | turquoise | 0.751  | 0.566  |
| CHRND   | turquoise | -0.395 | -0.731 |
| CHRNG   | turquoise | -0.730 | -0.839 |
| CHST12  | turquoise | -0.725 | -0.683 |
| CHTF8   | turquoise | 0.826  | 0.660  |
| CIB1    | turquoise | -0.804 | -0.851 |
| CITED1  | turquoise | -0.662 | -0.797 |
| CKAP4   | turquoise | 0.919  | 0.621  |
| CKAP5   | turquoise | 0.529  | 0.889  |
| CLASP1  | turquoise | 0.536  | 0.891  |
| CLASP2  | turquoise | 0.879  | 0.965  |
| CLCN1   | turquoise | -0.535 | -0.827 |
| CLCN3   | turquoise | 0.921  | 0.865  |
| CLCN5   | turquoise | 0.920  | 0.570  |
| CLDN9   | turquoise | -0.893 | -0.632 |
| CLK3    | turquoise | -0.923 | -0.680 |
| CLNS1A  | turquoise | -0.557 | -0.677 |
| CLOCK   | turquoise | 0.931  | 0.638  |
| CLTC    | turquoise | 0.793  | 0.981  |
| CMC1    | turquoise | 0.734  | 0.770  |
| CMC2    | turquoise | -0.633 | -0.373 |
| CMPK1   | turquoise | 0.695  | 0.860  |
| CMTM2   | turquoise | -0.574 | -0.580 |
| CMTM4   | turquoise | 0.821  | 0.925  |
| CNEP1R1 | turquoise | 0.717  | 0.550  |
| CNGA3   | turquoise | 0.830  | 0.386  |
| CNIH    | turquoise | 0.789  | 0.645  |
| CNNM2   | turquoise | 0.704  | 0.798  |
| CNO     | turquoise | -0.651 | -0.665 |
| CNOT7   | turquoise | 0.910  | 0.830  |
| CNPY4   | turquoise | -0.864 | -0.733 |

|          |           |        |        |
|----------|-----------|--------|--------|
| CNR1     | turquoise | 0.648  | 0.918  |
| CNST     | turquoise | 0.640  | 0.951  |
| CNTN1    | turquoise | 0.871  | 0.949  |
| CNTNAP5  | turquoise | 0.784  | 0.838  |
| COCH     | turquoise | 0.539  | 0.293  |
| COG5     | turquoise | 0.910  | 0.732  |
| COG6     | turquoise | 0.908  | 0.936  |
| COL12A1  | turquoise | 0.354  | 0.468  |
| COL19A1  | turquoise | 0.680  | 0.582  |
| COL25A1  | turquoise | 0.804  | 0.910  |
| COL4A3BP | turquoise | 0.836  | 0.894  |
| COL6A1   | turquoise | -0.718 | -0.860 |
| COMMD2   | turquoise | 0.826  | 0.819  |
| COMMD4   | turquoise | -0.619 | -0.675 |
| COPE     | turquoise | -0.622 | -0.610 |
| COPS2    | turquoise | 0.903  | 0.952  |
| COQ10B   | turquoise | 0.672  | 0.690  |
| COQ9     | turquoise | -0.841 | -0.735 |
| COX10    | turquoise | 0.463  | 0.934  |
| COX4NB   | turquoise | -0.693 | -0.615 |
| COX8C    | turquoise | -0.348 | -0.522 |
| CPD      | turquoise | 0.905  | 0.870  |
| CPEB3    | turquoise | 0.728  | 0.955  |
| CPNE1    | turquoise | -0.965 | -0.719 |
| CPSF3    | turquoise | 0.454  | 0.694  |
| CPSF6    | turquoise | 0.976  | 0.890  |
| CPT1B    | turquoise | -0.830 | -0.790 |
| CRABP2   | turquoise | -0.505 | -0.380 |
| CRAT     | turquoise | -0.765 | -0.779 |
| CRBN     | turquoise | 0.786  | 0.795  |
| CREBL2   | turquoise | 0.871  | 0.754  |
| CREG2    | turquoise | 0.702  | 0.850  |
| CRELD2   | turquoise | -0.878 | -0.708 |
| CRKL     | turquoise | 0.746  | 0.827  |
| CRLS1    | turquoise | -0.426 | -0.599 |
| CROCC    | turquoise | -0.800 | -0.319 |
| CRYBB2   | turquoise | -0.848 | -0.753 |
| CRYBB3   | turquoise | -0.455 | -0.448 |
| CRYGS    | turquoise | -0.737 | -0.664 |
| CSDE1    | turquoise | 0.762  | 0.838  |
| CSE1L    | turquoise | 0.851  | 0.981  |
| CSMD3    | turquoise | 0.622  | 0.567  |
| CSNK1E   | turquoise | -0.845 | -0.813 |
| CSNK1G1  | turquoise | 0.542  | 0.578  |
| CSNK1G3  | turquoise | 0.934  | 0.967  |
| CSRNP2   | turquoise | 0.692  | 0.857  |
| CSRNP3   | turquoise | 0.952  | 0.955  |

|               |           |        |        |
|---------------|-----------|--------|--------|
| CSTF3         | turquoise | 0.749  | 0.822  |
| CTA-282F2.3   | turquoise | -0.769 | -0.863 |
| CTA-299D3.8   | turquoise | -0.769 | -0.748 |
| CTAGE10P      | turquoise | 0.534  | 0.571  |
| CTC-203F4.1   | turquoise | -0.597 | -0.519 |
| CTC-231O11.1  | turquoise | -0.609 | -0.403 |
| CTC-463N11.3  | turquoise | 0.889  | 0.490  |
| CTC-558O2.1   | turquoise | -0.522 | -0.588 |
| CTD-2012J19.2 | turquoise | -0.215 | -0.761 |
| CTD-2201E18.3 | turquoise | -0.541 | -0.365 |
| CTD-2210P24.4 | turquoise | -0.546 | -0.338 |
| CTD-2258A20.2 | turquoise | -0.762 | -0.256 |
| CTD-2269F5.1  | turquoise | 0.863  | 0.592  |
| CTD-2547L16.1 | turquoise | 0.438  | 0.469  |
| CTD-2552B11.4 | turquoise | 0.950  | 0.956  |
| CTD-3064C13.1 | turquoise | -0.614 | -0.683 |
| CTDNEP1       | turquoise | -0.923 | -0.706 |
| CTRL          | turquoise | -0.806 | -0.399 |
| CTSC          | turquoise | 0.553  | 0.590  |
| CUL1          | turquoise | 0.557  | 0.853  |
| CUL3          | turquoise | 0.915  | 0.947  |
| CUL4B         | turquoise | 0.988  | 0.955  |
| CUL5          | turquoise | 0.871  | 0.748  |
| CXorf57       | turquoise | 0.842  | 0.792  |
| CXorf69       | turquoise | -0.345 | -0.642 |
| CXXC4         | turquoise | 0.788  | 0.622  |
| CYB5R4        | turquoise | 0.781  | 0.753  |
| CYB5RL        | turquoise | 0.634  | 0.434  |
| CYLD          | turquoise | 0.936  | 0.901  |
| CYP2A6        | turquoise | -0.623 | -0.833 |
| CYP2A7        | turquoise | -0.740 | -0.700 |
| CYP2F1        | turquoise | -0.376 | -0.630 |
| CYSTM1        | turquoise | -0.860 | -0.934 |
| DANCR         | turquoise | -0.817 | -0.835 |
| DAO           | turquoise | -0.856 | -0.497 |
| DAP           | turquoise | -0.637 | -0.911 |
| DAXX          | turquoise | -0.541 | -0.578 |
| DBF4B         | turquoise | -0.531 | -0.749 |
| DBH           | turquoise | 0.260  | 0.531  |
| DCAF17        | turquoise | 0.817  | 0.926  |
| DCAKD         | turquoise | -0.741 | -0.487 |
| DCC           | turquoise | 0.687  | 0.844  |
| DCK           | turquoise | 0.606  | 0.811  |
| DCLRE1A       | turquoise | 0.972  | 0.930  |
| DCP1B         | turquoise | 0.273  | 0.717  |
| DCP2          | turquoise | 0.856  | 0.909  |
| DCST1         | turquoise | -0.698 | -0.309 |

|             |           |        |        |
|-------------|-----------|--------|--------|
| DCTN4       | turquoise | 0.761  | 0.855  |
| DCTN5       | turquoise | 0.904  | 0.924  |
| DCUN1D1     | turquoise | 0.900  | 0.681  |
| DCUN1D4     | turquoise | 0.807  | 0.833  |
| DCX         | turquoise | 0.777  | 0.855  |
| DCXR        | turquoise | -0.881 | -0.920 |
| DDAH2       | turquoise | -0.926 | -0.926 |
| DDHD1       | turquoise | 0.899  | 0.685  |
| DDHD2       | turquoise | 0.873  | 0.966  |
| DDIT3       | turquoise | -0.516 | -0.649 |
| DDX27       | turquoise | -0.941 | -0.790 |
| DDX3X       | turquoise | 0.789  | 0.551  |
| DDX51       | turquoise | -0.657 | -0.472 |
| DDX55       | turquoise | -0.513 | -0.674 |
| DDX6        | turquoise | 0.936  | 0.902  |
| DEDD        | turquoise | -0.760 | -0.411 |
| DENND2A     | turquoise | -0.267 | -0.824 |
| DENND5B     | turquoise | 0.874  | 0.719  |
| DENND5B-AS1 | turquoise | -0.708 | -0.317 |
| DERL1       | turquoise | 0.787  | 0.646  |
| DGCR8       | turquoise | -0.710 | -0.700 |
| DGKE        | turquoise | 0.718  | 0.731  |
| DGKI        | turquoise | 0.899  | 0.881  |
| DHRS13      | turquoise | -0.420 | -0.865 |
| DHRS3       | turquoise | -0.734 | -0.852 |
| DIEXF       | turquoise | 0.781  | 0.840  |
| DLAT        | turquoise | 0.980  | 0.956  |
| DLD         | turquoise | 0.928  | 0.791  |
| DLEU2L      | turquoise | 0.668  | 0.627  |
| DLG1        | turquoise | 0.795  | 0.926  |
| DLG2        | turquoise | 0.770  | 0.901  |
| DMD         | turquoise | 0.845  | 0.349  |
| DMPK        | turquoise | -0.874 | -0.625 |
| DMXL1       | turquoise | 0.943  | 0.820  |
| DNAH3       | turquoise | -0.264 | -0.690 |
| DNAJA1      | turquoise | 0.700  | 0.767  |
| DNAJA4      | turquoise | 0.532  | 0.707  |
| DNAJB1      | turquoise | -0.262 | -0.650 |
| DNAJB14     | turquoise | 0.844  | 0.959  |
| DNAJC10     | turquoise | 0.936  | 0.933  |
| DNAJC13     | turquoise | 0.953  | 0.951  |
| DNAJC16     | turquoise | 0.921  | 0.897  |
| DNAJC17     | turquoise | -0.599 | -0.662 |
| DNAJC18     | turquoise | 0.943  | 0.955  |
| DNAJC27     | turquoise | 0.803  | 0.897  |
| DNAJC27-AS1 | turquoise | -0.826 | -0.534 |
| DNAJC4      | turquoise | -0.878 | -0.671 |

|           |           |        |        |
|-----------|-----------|--------|--------|
| DNAL1     | turquoise | 0.954  | 0.812  |
| DNASE1    | turquoise | -0.796 | -0.576 |
| DNLZ      | turquoise | -0.630 | -0.601 |
| DNM1L     | turquoise | 0.759  | 0.869  |
| DNM3      | turquoise | 0.948  | 0.961  |
| DNPEP     | turquoise | -0.818 | -0.786 |
| DNTTIP1   | turquoise | -0.717 | -0.621 |
| DOCK11    | turquoise | 0.795  | 0.749  |
| DOCK3     | turquoise | 0.546  | 0.957  |
| DOCK9     | turquoise | 0.562  | 0.893  |
| DOM3Z     | turquoise | -0.672 | -0.881 |
| DOPEY1    | turquoise | 0.777  | 0.904  |
| DOPEY2    | turquoise | 0.521  | 0.805  |
| DPH3      | turquoise | 0.844  | 0.396  |
| DPP10     | turquoise | 0.905  | 0.931  |
| DPP7      | turquoise | -0.731 | -0.703 |
| DPP8      | turquoise | 0.921  | 0.875  |
| DPY19L1   | turquoise | 0.829  | 0.883  |
| DQX1      | turquoise | -0.662 | -0.374 |
| DR1       | turquoise | 0.940  | 0.888  |
| DRD4      | turquoise | -0.833 | -0.727 |
| DROSHA    | turquoise | 0.380  | 0.920  |
| DSCAM-AS1 | turquoise | -0.554 | -0.839 |
| DTWD1     | turquoise | 0.733  | 0.768  |
| DTX2      | turquoise | -0.730 | -0.446 |
| DTYMK     | turquoise | -0.634 | -0.694 |
| DUS1L     | turquoise | -0.859 | -0.712 |
| DUS3L     | turquoise | -0.716 | -0.818 |
| DUSP23    | turquoise | -0.793 | -0.372 |
| DUSP3     | turquoise | 0.665  | 0.810  |
| DUSP9     | turquoise | -0.547 | -0.245 |
| DYM       | turquoise | 0.963  | 0.981  |
| DYNC1LI1  | turquoise | 0.932  | 0.893  |
| DYNLRB2   | turquoise | -0.543 | -0.679 |
| DYRK1A    | turquoise | 0.811  | 0.967  |
| EAF1      | turquoise | 0.921  | 0.868  |
| EBF3      | turquoise | -0.590 | -0.828 |
| EBLN2     | turquoise | -0.534 | -0.790 |
| ECE2      | turquoise | -0.351 | -0.547 |
| ECHDC2    | turquoise | -0.780 | -0.791 |
| ECI1      | turquoise | -0.726 | -0.876 |
| ECT2      | turquoise | 0.957  | 0.881  |
| EFCAB7    | turquoise | 0.662  | 0.725  |
| EFEMP2    | turquoise | -0.767 | -0.897 |
| EFHA2     | turquoise | 0.676  | 0.820  |
| EFHC1     | turquoise | 0.525  | 0.835  |
| EFNB2     | turquoise | 0.413  | 0.318  |



|          |           |        |        |
|----------|-----------|--------|--------|
| EFR3A    | turquoise | 0.929  | 0.833  |
| EFTUD1   | turquoise | 0.808  | 0.810  |
| EGLN1    | turquoise | 0.837  | 0.667  |
| EID2     | turquoise | 0.515  | 0.650  |
| EIF1AD   | turquoise | -0.789 | -0.616 |
| EIF1B    | turquoise | 0.720  | 0.694  |
| EIF2A    | turquoise | 0.736  | 0.622  |
| EIF2AK2  | turquoise | 0.921  | 0.433  |
| EIF2B4   | turquoise | -0.819 | -0.935 |
| EIF2S1   | turquoise | 0.796  | 0.828  |
| EIF3F    | turquoise | -0.643 | -0.780 |
| EIF4B    | turquoise | 0.556  | 0.787  |
| EIF4E3   | turquoise | 0.917  | 0.955  |
| EIF4G2   | turquoise | 0.884  | 0.872  |
| EIF5A2   | turquoise | 0.788  | 0.872  |
| ELAVL1   | turquoise | 0.855  | 0.894  |
| ELAVL2   | turquoise | 0.835  | 0.881  |
| ELMOD2   | turquoise | 0.746  | 0.734  |
| ELOF1    | turquoise | -0.625 | -0.747 |
| ELOVL4   | turquoise | 0.569  | 0.871  |
| ELOVL6   | turquoise | 0.761  | 0.919  |
| ELP2     | turquoise | 0.617  | 0.800  |
| EMB      | turquoise | 0.769  | 0.899  |
| ENO1     | turquoise | -0.775 | -0.674 |
| ENPP5    | turquoise | 0.759  | 0.855  |
| ENTPD4   | turquoise | 0.898  | 0.970  |
| EPB42    | turquoise | -0.612 | -0.579 |
| EPC2     | turquoise | 0.698  | 0.812  |
| EPG5     | turquoise | 0.693  | 0.893  |
| EPHA7    | turquoise | 0.774  | 0.933  |
| EPM2AIP1 | turquoise | 0.575  | 0.433  |
| EPS15    | turquoise | 0.798  | 0.976  |
| EPT1     | turquoise | 0.995  | 0.980  |
| ERAS     | turquoise | -0.521 | -0.784 |
| ERCC6    | turquoise | 0.428  | 0.897  |
| ERGIC3   | turquoise | -0.535 | -0.421 |
| ERI2     | turquoise | 0.808  | 0.783  |
| ERLEC1   | turquoise | 0.879  | 0.760  |
| ERN2     | turquoise | -0.719 | -0.694 |
| ERVFRD-1 | turquoise | -0.725 | -0.551 |
| ESPN     | turquoise | -0.446 | -0.698 |
| ESR1     | turquoise | 0.454  | 0.609  |
| ESRP2    | turquoise | -0.962 | -0.856 |
| ESRRG    | turquoise | 0.737  | 0.920  |
| ETNK1    | turquoise | 0.878  | 0.904  |
| ETV1     | turquoise | 0.852  | 0.364  |
| EXOC1    | turquoise | 0.853  | 0.729  |

|          |           |        |        |
|----------|-----------|--------|--------|
| EXOC2    | turquoise | 0.675  | 0.918  |
| EXOC4    | turquoise | 0.598  | 0.905  |
| EXOC5    | turquoise | 0.945  | 0.510  |
| EXOC8    | turquoise | 0.809  | 0.877  |
| EXOSC1   | turquoise | -0.894 | -0.816 |
| EXOSC7   | turquoise | -0.798 | -0.602 |
| EXT1     | turquoise | 0.411  | 0.851  |
| EXTL2    | turquoise | 0.785  | 0.899  |
| FAF1     | turquoise | 0.425  | 0.928  |
| FAHD2A   | turquoise | -0.888 | -0.821 |
| FAM100B  | turquoise | -0.901 | -0.797 |
| FAM105A  | turquoise | 0.307  | 0.700  |
| FAM109A  | turquoise | -0.708 | -0.901 |
| FAM117B  | turquoise | 0.886  | 0.864  |
| FAM122B  | turquoise | 0.606  | 0.729  |
| FAM126B  | turquoise | 0.921  | 0.908  |
| FAM129B  | turquoise | -0.576 | -0.757 |
| FAM132A  | turquoise | -0.364 | -0.557 |
| FAM135B  | turquoise | 0.845  | 0.929  |
| FAM13A   | turquoise | 0.661  | 0.534  |
| FAM13B   | turquoise | 0.907  | 0.922  |
| FAM151A  | turquoise | -0.820 | -0.668 |
| FAM160B1 | turquoise | 0.891  | 0.927  |
| FAM168A  | turquoise | 0.587  | 0.783  |
| FAM168B  | turquoise | 0.736  | 0.962  |
| FAM169A  | turquoise | 0.943  | 0.969  |
| FAM173A  | turquoise | -0.516 | -0.541 |
| FAM175B  | turquoise | 0.595  | 0.763  |
| FAM179B  | turquoise | 0.981  | 0.915  |
| FAM188A  | turquoise | 0.893  | 0.799  |
| FAM188B  | turquoise | -0.736 | -0.560 |
| FAM190B  | turquoise | 0.928  | 0.704  |
| FAM193A  | turquoise | -0.771 | -0.877 |
| FAM193B  | turquoise | -0.567 | -0.783 |
| FAM195A  | turquoise | -0.700 | -0.813 |
| FAM199X  | turquoise | 0.932  | 0.873  |
| FAM200A  | turquoise | 0.807  | 0.397  |
| FAM20B   | turquoise | 0.714  | 0.930  |
| FAM210A  | turquoise | 0.687  | 0.611  |
| FAM211B  | turquoise | -0.691 | -0.663 |
| FAM217B  | turquoise | 0.873  | 0.839  |
| FAM21C   | turquoise | 0.736  | 0.527  |
| FAM220A  | turquoise | 0.502  | 0.824  |
| FAM3C    | turquoise | 0.889  | 0.850  |
| FAM49A   | turquoise | 0.925  | 0.910  |
| FAM49B   | turquoise | 0.865  | 0.929  |
| FAM53C   | turquoise | 0.422  | 0.806  |

|          |           |        |        |
|----------|-----------|--------|--------|
| FAM54B   | turquoise | -0.828 | -0.730 |
| FAM57A   | turquoise | -0.737 | -0.782 |
| FAM69A   | turquoise | 0.773  | 0.939  |
| FAM71D   | turquoise | -0.544 | -0.918 |
| FAM71F2  | turquoise | -0.831 | -0.836 |
| FAM73A   | turquoise | 0.951  | 0.965  |
| FAM8A1   | turquoise | 0.812  | 0.957  |
| FAM91A1  | turquoise | 0.958  | 0.787  |
| FAM98A   | turquoise | 0.689  | 0.861  |
| FANCF    | turquoise | 0.602  | 0.757  |
| FANK1    | turquoise | -0.742 | -0.761 |
| FAR2     | turquoise | 0.670  | 0.953  |
| FASTKD2  | turquoise | 0.761  | 0.928  |
| FASTKD5  | turquoise | 0.441  | 0.447  |
| FAT3     | turquoise | 0.724  | 0.792  |
| FAXC     | turquoise | 0.810  | 0.897  |
| FBN2     | turquoise | -0.551 | -0.393 |
| FBXL12   | turquoise | -0.895 | -0.866 |
| FBXL17   | turquoise | 0.709  | 0.860  |
| FBXL20   | turquoise | 0.510  | 0.734  |
| FBXL4    | turquoise | 0.882  | 0.898  |
| FBXL5    | turquoise | 0.889  | 0.817  |
| FBXL6    | turquoise | -0.629 | -0.382 |
| FBXO11   | turquoise | 0.913  | 0.923  |
| FBXO2    | turquoise | -0.754 | -0.734 |
| FBXO28   | turquoise | 0.930  | 0.923  |
| FBXO3    | turquoise | 0.907  | 0.918  |
| FBXO45   | turquoise | 0.962  | 0.902  |
| FBXO6    | turquoise | -0.576 | -0.761 |
| FBXW10   | turquoise | -0.692 | -0.782 |
| FBXW11   | turquoise | 0.898  | 0.950  |
| FBXW12   | turquoise | -0.842 | -0.453 |
| FBXW4P1  | turquoise | -0.788 | -0.615 |
| FDXR     | turquoise | -0.617 | -0.577 |
| FEM1B    | turquoise | 0.963  | 0.978  |
| FGF5     | turquoise | 0.491  | 0.840  |
| FGFR1OP  | turquoise | 0.753  | 0.791  |
| FGFR1OP2 | turquoise | 0.668  | 0.628  |
| FGGY     | turquoise | -0.742 | -0.520 |
| FITM2    | turquoise | 0.752  | 0.937  |
| FLRT3    | turquoise | 0.836  | 0.897  |
| FMN1     | turquoise | 0.793  | 0.855  |
| FMO3     | turquoise | -0.250 | -0.605 |
| FMR1     | turquoise | 0.721  | 0.708  |
| FNIP2    | turquoise | 0.811  | 0.591  |
| FPGS     | turquoise | -0.756 | -0.834 |
| FRMD4A   | turquoise | -0.678 | -0.809 |

|           |           |        |        |
|-----------|-----------|--------|--------|
| FRMPD4    | turquoise | 0.693  | 0.948  |
| FRRS1L    | turquoise | 0.862  | 0.937  |
| FRY       | turquoise | 0.723  | 0.905  |
| FSD1L     | turquoise | 0.830  | 0.893  |
| FSTL3     | turquoise | -0.912 | -0.887 |
| FTH1P3    | turquoise | -0.522 | -0.666 |
| FTL       | turquoise | -0.670 | -0.928 |
| FTX       | turquoise | -0.354 | -0.923 |
| FUT2      | turquoise | -0.704 | -0.850 |
| FUT9      | turquoise | 0.858  | 0.278  |
| FXC1      | turquoise | 0.753  | 0.738  |
| FXYD1     | turquoise | -0.720 | -0.817 |
| FXYD5     | turquoise | -0.552 | -0.491 |
| FYTTD1    | turquoise | 0.952  | 0.748  |
| FZD9      | turquoise | -0.631 | -0.724 |
| GOS2      | turquoise | -0.578 | -0.647 |
| G2E3      | turquoise | 0.863  | 0.661  |
| GABRA1    | turquoise | 0.884  | 0.950  |
| GABRA4    | turquoise | 0.859  | 0.939  |
| GABRB2    | turquoise | 0.926  | 0.851  |
| GABRG3    | turquoise | 0.647  | 0.811  |
| GADD45A   | turquoise | -0.467 | -0.647 |
| GALNT13   | turquoise | 0.812  | 0.970  |
| GALT      | turquoise | -0.842 | -0.785 |
| GARNL3    | turquoise | 0.442  | 0.736  |
| GAS7      | turquoise | 0.813  | 0.888  |
| GATC      | turquoise | 0.471  | 0.727  |
| GBE1      | turquoise | 0.503  | 0.647  |
| GCFC1-AS1 | turquoise | 0.604  | 0.888  |
| GCNT2     | turquoise | 0.600  | 0.433  |
| GDAP1     | turquoise | 0.770  | 0.924  |
| GDF7      | turquoise | 0.837  | 0.737  |
| GDI2      | turquoise | 0.971  | 0.956  |
| GDPD3     | turquoise | -0.546 | -0.531 |
| GFM1      | turquoise | 0.719  | 0.812  |
| GFPT1     | turquoise | 0.939  | 0.954  |
| GGH       | turquoise | 0.797  | 0.642  |
| GGNBP2    | turquoise | -0.531 | -0.510 |
| GHRLOS    | turquoise | -0.723 | -0.554 |
| GIN1      | turquoise | 0.664  | 0.554  |
| GLCE      | turquoise | 0.800  | 0.935  |
| GLI4      | turquoise | -0.941 | -0.409 |
| GLIPR1    | turquoise | 0.704  | 0.835  |
| GLIS2     | turquoise | -0.722 | -0.762 |
| GLMN      | turquoise | 0.628  | 0.694  |
| GLO1      | turquoise | 0.722  | 0.808  |
| GLRA2     | turquoise | 0.788  | 0.828  |

|          |           |        |        |
|----------|-----------|--------|--------|
| GLRX2    | turquoise | 0.472  | 0.451  |
| GLTSCR1  | turquoise | -0.667 | -0.825 |
| GLTSCR2  | turquoise | -0.171 | -0.456 |
| GMEB1    | turquoise | -0.650 | -0.734 |
| GMFB     | turquoise | 0.968  | 0.930  |
| GMPS     | turquoise | 0.981  | 0.890  |
| GNA14    | turquoise | -0.510 | -0.722 |
| GNAI1    | turquoise | 0.816  | 0.898  |
| GNB2     | turquoise | -0.756 | -0.652 |
| GNL1     | turquoise | 0.699  | 0.838  |
| GNL3L    | turquoise | -0.944 | -0.789 |
| GNPAT    | turquoise | 0.570  | 0.439  |
| GNPDA2   | turquoise | 0.641  | 0.831  |
| GNPNAT1  | turquoise | 0.812  | 0.606  |
| GNRHR    | turquoise | 0.573  | 0.785  |
| GNS      | turquoise | 0.661  | 0.669  |
| GOLGA5   | turquoise | 0.744  | 0.894  |
| GOLGA6L5 | turquoise | -0.587 | -0.651 |
| GOLPH3L  | turquoise | 0.886  | 0.748  |
| GOLT1B   | turquoise | 0.774  | 0.931  |
| GOPC     | turquoise | 0.319  | 0.640  |
| GPAT2    | turquoise | -0.445 | -0.582 |
| GPBP1    | turquoise | 0.772  | 0.547  |
| GPCPD1   | turquoise | 0.573  | 0.772  |
| GPD1L    | turquoise | 0.860  | 0.922  |
| GPR1     | turquoise | -0.478 | -0.530 |
| GPR107   | turquoise | 0.497  | 0.523  |
| GPR116   | turquoise | 0.477  | 0.407  |
| GPR12    | turquoise | 0.757  | 0.937  |
| GPR126   | turquoise | 0.699  | 0.507  |
| GPR137C  | turquoise | 0.811  | 0.903  |
| GPR148   | turquoise | -0.635 | -0.522 |
| GPR158   | turquoise | 0.933  | 0.966  |
| GPR179   | turquoise | 0.613  | 0.844  |
| GPR180   | turquoise | 0.840  | 0.826  |
| GPR35    | turquoise | -0.773 | -0.491 |
| GPR52    | turquoise | 0.630  | 0.741  |
| GPRIN2   | turquoise | 0.503  | 0.710  |
| GPX2     | turquoise | -0.473 | -0.703 |
| GRB10    | turquoise | 0.590  | 0.817  |
| GRB2     | turquoise | 0.746  | 0.877  |
| GRID2IP  | turquoise | -0.644 | -0.642 |
| GRIN2A   | turquoise | 0.847  | 0.826  |
| GRM6     | turquoise | -0.789 | -0.866 |
| GRPEL2   | turquoise | 0.741  | 0.447  |
| GRSF1    | turquoise | 0.803  | 0.943  |
| GSK3B    | turquoise | 0.989  | 0.979  |

|          |           |        |        |
|----------|-----------|--------|--------|
| GSTA4    | turquoise | 0.724  | 0.741  |
| GSTP1    | turquoise | -0.699 | -0.708 |
| GTDC1    | turquoise | 0.960  | 0.952  |
| GTF2A1   | turquoise | 0.834  | 0.823  |
| GTF2IRD1 | turquoise | -0.654 | -0.914 |
| GTF3C3   | turquoise | 0.847  | 0.777  |
| GTF3C4   | turquoise | 0.923  | 0.830  |
| GTPBP10  | turquoise | 0.791  | 0.854  |
| GUCA1B   | turquoise | -0.673 | -0.711 |
| GUCY1A2  | turquoise | 0.579  | 0.689  |
| GUCY1A3  | turquoise | 0.752  | 0.911  |
| GUF1     | turquoise | 0.949  | 0.918  |
| GULP1    | turquoise | 0.760  | 0.809  |
| GYS1     | turquoise | -0.967 | -0.884 |
| H19      | turquoise | -0.547 | -0.229 |
| H2AFV    | turquoise | 0.884  | 0.665  |
| H2AFX    | turquoise | -0.499 | -0.819 |
| HAAO     | turquoise | -0.953 | -0.827 |
| HACE1    | turquoise | 0.867  | 0.819  |
| HAGHL    | turquoise | -0.720 | -0.343 |
| HAPLN3   | turquoise | -0.663 | -0.749 |
| HAUS7    | turquoise | -0.747 | -0.353 |
| HBS1L    | turquoise | 0.780  | 0.868  |
| HCG18    | turquoise | 0.699  | 0.802  |
| HCG25    | turquoise | -0.678 | -0.712 |
| HCG27    | turquoise | -0.855 | -0.527 |
| HDAC10   | turquoise | -0.648 | -0.857 |
| HDAC3    | turquoise | -0.543 | -0.658 |
| HDAC9    | turquoise | 0.718  | 0.897  |
| HDHD2    | turquoise | 0.673  | 0.735  |
| HDHD3    | turquoise | -0.975 | -0.829 |
| HEATR1   | turquoise | 0.806  | 0.578  |
| HEATR2   | turquoise | -0.850 | -0.725 |
| HEATR5B  | turquoise | 0.777  | 0.980  |
| HECA     | turquoise | 0.834  | 0.858  |
| HECTD1   | turquoise | 0.828  | 0.957  |
| HECTD2   | turquoise | 0.711  | 0.465  |
| HECW1    | turquoise | 0.567  | 0.903  |
| HECW2    | turquoise | 0.697  | 0.934  |
| HERC3    | turquoise | 0.864  | 0.910  |
| HEYL     | turquoise | -0.682 | -0.478 |
| HHIPL1   | turquoise | -0.529 | -0.409 |
| HIAT1    | turquoise | 0.703  | 0.794  |
| HIGD1B   | turquoise | -0.494 | -0.754 |
| HINFP    | turquoise | -0.946 | -0.386 |
| HINT3    | turquoise | 0.883  | 0.829  |
| HIRA     | turquoise | -0.841 | -0.808 |

|           |           |        |        |
|-----------|-----------|--------|--------|
| HIRIP3    | turquoise | -0.832 | -0.557 |
| HIVEP1    | turquoise | 0.437  | 0.835  |
| HLTF      | turquoise | 0.812  | 0.884  |
| HMG20A    | turquoise | 0.758  | 0.971  |
| HMGB2     | turquoise | -0.680 | -0.661 |
| HMGCS1    | turquoise | 0.810  | 0.854  |
| HMGN4     | turquoise | 0.421  | 0.784  |
| HNRNPA1L2 | turquoise | -0.778 | -0.309 |
| HNRNPA3   | turquoise | 0.902  | 0.814  |
| HNRNPK    | turquoise | 0.736  | 0.785  |
| HNRNPKP3  | turquoise | -0.398 | -0.615 |
| HNRNPM    | turquoise | -0.597 | -0.858 |
| HNRPLL    | turquoise | 0.820  | 0.905  |
| HPS3      | turquoise | 0.814  | 0.892  |
| HRC       | turquoise | -0.453 | -0.409 |
| HSD11B2   | turquoise | -0.675 | -0.506 |
| HSD3B7    | turquoise | -0.790 | -0.878 |
| HSF2      | turquoise | 0.627  | 0.755  |
| HSF4      | turquoise | -0.922 | -0.613 |
| HSH2D     | turquoise | -0.566 | -0.828 |
| HSPA12A   | turquoise | 0.766  | 0.962  |
| HSPA13    | turquoise | 0.982  | 0.804  |
| HSPA14    | turquoise | 0.819  | 0.859  |
| HSPA1A    | turquoise | -0.582 | -0.535 |
| HSPA4     | turquoise | 0.896  | 0.864  |
| HSPB6     | turquoise | -0.624 | -0.743 |
| HYAL1     | turquoise | -0.647 | -0.951 |
| HYDIN     | turquoise | -0.693 | -0.682 |
| IARS2     | turquoise | 0.893  | 0.894  |
| IBA57     | turquoise | -0.482 | -0.869 |
| IBTK      | turquoise | 0.911  | 0.433  |
| IDH2      | turquoise | -0.774 | -0.656 |
| IDH3A     | turquoise | 0.885  | 0.819  |
| IDI2      | turquoise | -0.506 | -0.727 |
| IER2      | turquoise | -0.474 | -0.662 |
| IFI27L2   | turquoise | -0.615 | -0.422 |
| IFI35     | turquoise | -0.793 | -0.881 |
| IFIT5     | turquoise | 0.799  | 0.631  |
| IFITM2    | turquoise | -0.652 | -0.679 |
| IFITM3    | turquoise | -0.833 | -0.741 |
| IFRD2     | turquoise | -0.694 | -0.749 |
| IFT43     | turquoise | -0.832 | -0.877 |
| IFT80     | turquoise | 0.846  | 0.839  |
| IGDCC3    | turquoise | -0.081 | -0.805 |
| IGFALS    | turquoise | -0.776 | -0.760 |
| IGFBP5    | turquoise | 0.094  | 0.454  |
| IKBKAP    | turquoise | 0.723  | 0.804  |

|             |           |        |        |
|-------------|-----------|--------|--------|
| IL10RB      | turquoise | -0.670 | -0.536 |
| IL15RA      | turquoise | -0.314 | -0.677 |
| IL29        | turquoise | -0.565 | -0.497 |
| ILD2R2      | turquoise | 0.686  | 0.857  |
| ILK         | turquoise | -0.309 | -0.545 |
| ILKAP       | turquoise | -0.805 | -0.624 |
| IMPAD1      | turquoise | 0.906  | 0.917  |
| INO80       | turquoise | -0.337 | -0.740 |
| INO80E      | turquoise | -0.413 | -0.435 |
| INPP5F      | turquoise | 0.813  | 0.913  |
| INSIG2      | turquoise | 0.662  | 0.936  |
| INSM2       | turquoise | 0.706  | 0.752  |
| INTS7       | turquoise | 0.777  | 0.590  |
| INTS9       | turquoise | -0.851 | -0.611 |
| IPCEF1      | turquoise | 0.895  | 0.882  |
| IPO11       | turquoise | 0.922  | 0.862  |
| IPO5        | turquoise | 0.675  | 0.935  |
| IPO7        | turquoise | 0.954  | 0.804  |
| IQCJ-SCHIP1 | turquoise | 0.454  | 0.897  |
| IRS1        | turquoise | 0.610  | 0.897  |
| ISCA1       | turquoise | 0.840  | 0.881  |
| ISYNA1      | turquoise | -0.538 | -0.410 |
| ITCH        | turquoise | 0.815  | 0.759  |
| ITFG1       | turquoise | 0.911  | 0.957  |
| ITFG2       | turquoise | -0.805 | -0.621 |
| ITPK1-AS1   | turquoise | -0.615 | -0.869 |
| ITPR1       | turquoise | 0.602  | 0.913  |
| IZUMO1      | turquoise | -0.548 | -0.708 |
| JAK1        | turquoise | 0.777  | 0.348  |
| JAZF1       | turquoise | 0.897  | 0.802  |
| JKAMP       | turquoise | 0.879  | 0.875  |
| KAT7        | turquoise | 0.652  | 0.928  |
| KATNAL1     | turquoise | 0.916  | 0.959  |
| KBTBD11     | turquoise | 0.866  | 0.726  |
| KBTBD3      | turquoise | 0.917  | 0.935  |
| KBTBD6      | turquoise | 0.695  | 0.782  |
| KBTBD7      | turquoise | 0.310  | 0.683  |
| KBTBD8      | turquoise | 0.763  | 0.858  |
| KCNA2       | turquoise | 0.834  | 0.913  |
| KCNAB1      | turquoise | 0.763  | 0.894  |
| KCNB1       | turquoise | 0.699  | 0.872  |
| KCNC2       | turquoise | 0.865  | 0.892  |
| KCND2       | turquoise | 0.752  | 0.935  |
| KCNJ14      | turquoise | -0.887 | -0.441 |
| KCNJ3       | turquoise | 0.729  | 0.922  |
| KCNK6       | turquoise | -0.543 | -0.673 |
| KCNK7       | turquoise | -0.841 | -0.398 |



|             |           |        |        |
|-------------|-----------|--------|--------|
| KCNMA1      | turquoise | 0.703  | 0.828  |
| KCNMB2      | turquoise | 0.433  | 0.497  |
| KCNQ3       | turquoise | 0.876  | 0.812  |
| KCNRG       | turquoise | -0.760 | -0.637 |
| KCNT2       | turquoise | 0.903  | 0.948  |
| KCTD10      | turquoise | 0.717  | 0.831  |
| KCTD15      | turquoise | -0.528 | -0.652 |
| KCTD16      | turquoise | 0.790  | 0.541  |
| KCTD9       | turquoise | 0.706  | 0.507  |
| KDELR1      | turquoise | -0.658 | -0.302 |
| KDM5A       | turquoise | -0.679 | -0.903 |
| KDM5B-AS1   | turquoise | -0.692 | -0.624 |
| KIAA0232    | turquoise | 0.957  | 0.939  |
| KIAA0240    | turquoise | 0.463  | 0.951  |
| KIAA0317    | turquoise | 0.735  | 0.931  |
| KIAA0368    | turquoise | 0.954  | 0.934  |
| KIAA0430    | turquoise | 0.859  | 0.851  |
| KIAA0528    | turquoise | 0.759  | 0.902  |
| KIAA0895    | turquoise | 0.898  | 0.924  |
| KIAA0930    | turquoise | -0.449 | -0.331 |
| KIAA0947    | turquoise | 0.960  | 0.840  |
| KIAA1107    | turquoise | 0.814  | 0.814  |
| KIAA1109    | turquoise | 0.948  | 0.849  |
| KIAA1143    | turquoise | 0.935  | 0.618  |
| KIAA1211    | turquoise | 0.780  | 0.750  |
| KIAA1217    | turquoise | 0.628  | 0.900  |
| KIAA1244    | turquoise | 0.937  | 0.827  |
| KIAA1279    | turquoise | 0.605  | 0.830  |
| KIAA1456    | turquoise | 0.751  | 0.678  |
| KIAA1462    | turquoise | 0.740  | 0.706  |
| KIAA1467    | turquoise | 0.533  | 0.920  |
| KIAA1468    | turquoise | 0.894  | 0.973  |
| KIAA1609    | turquoise | -0.756 | -0.342 |
| KIAA1671    | turquoise | 0.819  | 0.817  |
| KIAA1704    | turquoise | 0.902  | 0.787  |
| KIAA1715    | turquoise | 0.901  | 0.908  |
| KIAA1841    | turquoise | 0.698  | 0.724  |
| KIAA2022    | turquoise | 0.963  | 0.926  |
| KIDINS220   | turquoise | 0.917  | 0.883  |
| KIF11       | turquoise | 0.619  | 0.528  |
| KIF16B      | turquoise | -0.625 | -0.824 |
| KIF1B       | turquoise | 0.772  | 0.892  |
| KIF2A       | turquoise | 0.925  | 0.832  |
| KIRREL3-AS2 | turquoise | -0.660 | -0.872 |
| KISS1R      | turquoise | -0.623 | -0.495 |
| KIT         | turquoise | 0.686  | 0.464  |
| KITLG       | turquoise | 0.853  | 0.905  |

|               |           |        |        |
|---------------|-----------|--------|--------|
| KL            | turquoise | 0.624  | 0.834  |
| KLF12         | turquoise | 0.933  | 0.940  |
| KLF6          | turquoise | -0.636 | -0.750 |
| KLF8          | turquoise | 0.898  | 0.943  |
| KLF9          | turquoise | 0.750  | 0.763  |
| KLHDC10       | turquoise | 0.894  | 0.935  |
| KLHDC5        | turquoise | 0.840  | 0.913  |
| KLHL13        | turquoise | 0.660  | 0.727  |
| KLHL28        | turquoise | 0.771  | 0.764  |
| KLHL7         | turquoise | 0.644  | 0.833  |
| KLHL8         | turquoise | 0.875  | 0.553  |
| KLHL9         | turquoise | 0.832  | 0.925  |
| CLK14         | turquoise | -0.874 | -0.772 |
| KPNA1         | turquoise | 0.933  | 0.944  |
| KPNA3         | turquoise | 0.862  | 0.546  |
| KPNA4         | turquoise | 0.967  | 0.734  |
| KPNA6         | turquoise | 0.922  | 0.725  |
| KRAS          | turquoise | 0.935  | 0.913  |
| KRI1          | turquoise | -0.577 | -0.849 |
| KRIT1         | turquoise | 0.810  | 0.447  |
| KRR1          | turquoise | 0.850  | 0.763  |
| KRTAP5-8      | turquoise | -0.663 | -0.529 |
| KRTAP5-9      | turquoise | -0.724 | -0.469 |
| LA16c-431H6.6 | turquoise | -0.880 | -0.862 |
| LACE1         | turquoise | 0.766  | 0.711  |
| LAMTOR3       | turquoise | 0.862  | 0.972  |
| LARP4B        | turquoise | 0.782  | 0.744  |
| LAS1L         | turquoise | -0.805 | -0.383 |
| LAT           | turquoise | -0.900 | -0.748 |
| LBH           | turquoise | 0.742  | 0.462  |
| LCLAT1        | turquoise | 0.904  | 0.857  |
| LCT           | turquoise | -0.443 | -0.645 |
| LDHD          | turquoise | -0.715 | -0.759 |
| LEMD3         | turquoise | 0.926  | 0.892  |
| LEPR          | turquoise | 0.791  | 0.808  |
| LEPRE1        | turquoise | -0.910 | -0.805 |
| LEPROTL1      | turquoise | 0.769  | 0.905  |
| LGALS1        | turquoise | 0.801  | 0.966  |
| LGI4          | turquoise | -0.769 | -0.808 |
| LHX2          | turquoise | -0.581 | -0.822 |
| LIG4          | turquoise | 0.908  | 0.942  |
| LIN37         | turquoise | -0.822 | -0.714 |
| LIN7A         | turquoise | 0.903  | 0.907  |
| LIN9          | turquoise | 0.803  | 0.336  |
| LINC00085     | turquoise | -0.815 | -0.753 |
| LINC00173     | turquoise | -0.793 | -0.603 |
| LINC00222     | turquoise | -0.617 | -0.699 |

|                |           |        |        |
|----------------|-----------|--------|--------|
| LINC00311      | turquoise | -0.705 | -0.859 |
| LINC00571      | turquoise | -0.373 | -0.757 |
| LINC00574      | turquoise | -0.882 | -0.534 |
| LL0XNC01-157D4 | turquoise | 0.673  | 0.803  |
| LL22NC03-80A10 | turquoise | 0.646  | 0.850  |
| LMBR1          | turquoise | 0.935  | 0.938  |
| LMBRD1         | turquoise | 0.847  | 0.844  |
| LMBRD2         | turquoise | 0.978  | 0.982  |
| LMO3           | turquoise | 0.750  | 0.853  |
| LNP1           | turquoise | 0.549  | 0.825  |
| LNPEP          | turquoise | 0.806  | 0.860  |
| LOX            | turquoise | 0.260  | 0.523  |
| LPCAT3         | turquoise | -0.592 | -0.650 |
| LPGAT1         | turquoise | 0.965  | 0.974  |
| LPHN2          | turquoise | 0.537  | 0.931  |
| LRBA           | turquoise | 0.906  | 0.631  |
| LRP12          | turquoise | 0.842  | 0.755  |
| LRPPRC         | turquoise | 0.906  | 0.965  |
| LRRC23         | turquoise | -0.812 | -0.763 |
| LRRC29         | turquoise | -0.691 | -0.815 |
| LRRC34         | turquoise | -0.452 | -0.483 |
| LRRC40         | turquoise | 0.795  | 0.744  |
| LRRC46         | turquoise | -0.284 | -0.386 |
| LRRC57         | turquoise | 0.311  | 0.699  |
| LRRC66         | turquoise | -0.713 | -0.509 |
| LRRC71         | turquoise | -0.459 | -0.827 |
| LRRC8B         | turquoise | 0.904  | 0.929  |
| LRRK2          | turquoise | 0.890  | 0.926  |
| LRRN1          | turquoise | 0.392  | 0.574  |
| LRRN3          | turquoise | 0.862  | 0.531  |
| LRRTM3         | turquoise | 0.897  | 0.953  |
| LRTOMT         | turquoise | -0.778 | -0.853 |
| LSM11          | turquoise | 0.725  | 0.939  |
| LSM12          | turquoise | 0.741  | 0.268  |
| LTA4H          | turquoise | 0.463  | 0.442  |
| LTN1           | turquoise | 0.905  | 0.898  |
| LUZP2          | turquoise | 0.936  | 0.509  |
| LY6G5C         | turquoise | -0.520 | -0.642 |
| LYG1           | turquoise | -0.527 | -0.847 |
| LYPD6          | turquoise | 0.317  | 0.585  |
| LYPD6B         | turquoise | -0.654 | -0.618 |
| LYPLA1         | turquoise | 0.939  | 0.703  |
| LZTFL1         | turquoise | 0.893  | 0.872  |
| MAB21L3        | turquoise | -0.368 | -0.201 |
| MAD2L1         | turquoise | 0.703  | 0.850  |
| MAEL           | turquoise | 0.387  | 0.568  |
| MAF1           | turquoise | -0.756 | -0.792 |

|          |           |        |        |
|----------|-----------|--------|--------|
| MAGEH1   | turquoise | 0.713  | 0.848  |
| MAGI1    | turquoise | 0.711  | 0.908  |
| MAK      | turquoise | -0.506 | -0.935 |
| MAMDC2   | turquoise | 0.398  | 0.555  |
| MAMSTR   | turquoise | -0.443 | -0.592 |
| MANSC1   | turquoise | 0.544  | 0.824  |
| MAP2K3   | turquoise | -0.685 | -0.751 |
| MAP2K7   | turquoise | -0.513 | -0.860 |
| MAP3K7   | turquoise | 0.878  | 0.751  |
| MAP3K9   | turquoise | 0.662  | 0.843  |
| MAP4K1   | turquoise | -0.715 | -0.521 |
| MAP4K3   | turquoise | 0.950  | 0.940  |
| MAPK1    | turquoise | 0.889  | 0.962  |
| MAPK10   | turquoise | 0.642  | 0.920  |
| MAPK14   | turquoise | 0.762  | 0.877  |
| MAPK6    | turquoise | 0.895  | 0.935  |
| MAPK8    | turquoise | 0.847  | 0.960  |
| MAPRE2   | turquoise | 0.625  | 0.639  |
| MARCH1-2 | turquoise | 0.805  | 0.844  |
| MARCH2-2 | turquoise | -0.702 | -0.581 |
| MARK2P9  | turquoise | -0.684 | -0.532 |
| MASTL    | turquoise | 0.705  | 0.707  |
| MB21D2   | turquoise | 0.412  | 0.850  |
| MBD5     | turquoise | 0.881  | 0.969  |
| MBL1P    | turquoise | -0.427 | -0.711 |
| MBNL1    | turquoise | 0.900  | 0.799  |
| MBNL2    | turquoise | 0.805  | 0.924  |
| MBTPS2   | turquoise | 0.806  | 0.890  |
| MCART1   | turquoise | 0.801  | 0.611  |
| MCF2     | turquoise | 0.830  | 0.827  |
| MCFD2    | turquoise | 0.818  | 0.752  |
| MCTP1    | turquoise | 0.758  | 0.792  |
| MCTP2    | turquoise | 0.595  | 0.492  |
| MDH1B    | turquoise | 0.355  | 0.564  |
| MDK      | turquoise | -0.394 | -0.976 |
| MECP2    | turquoise | 0.748  | 0.877  |
| MED11    | turquoise | -0.799 | -0.566 |
| MED12L   | turquoise | 0.828  | 0.697  |
| MED22    | turquoise | -0.765 | -0.542 |
| MED28    | turquoise | 0.763  | 0.624  |
| MED7     | turquoise | 0.741  | 0.839  |
| MEF2A    | turquoise | 0.722  | 0.975  |
| MEF2C    | turquoise | 0.687  | 0.827  |
| MEMO1P1  | turquoise | 0.534  | 0.874  |
| MEOX1    | turquoise | -0.690 | -0.875 |
| MET      | turquoise | 0.589  | 0.717  |
| METRN    | turquoise | -0.830 | -0.669 |

|          |           |        |        |
|----------|-----------|--------|--------|
| METRNL   | turquoise | -0.707 | -0.742 |
| METTL10  | turquoise | 0.576  | 0.579  |
| METTL21D | turquoise | 0.534  | 0.873  |
| METTL23  | turquoise | -0.424 | -0.602 |
| METTL4   | turquoise | 0.866  | 0.713  |
| MFF      | turquoise | 0.704  | 0.764  |
| MFGE8    | turquoise | -0.685 | -0.748 |
| MFSD2B   | turquoise | -0.853 | -0.570 |
| MFSD9    | turquoise | 0.692  | 0.866  |
| MGAT4A   | turquoise | 0.948  | 0.895  |
| MGAT5    | turquoise | 0.835  | 0.873  |
| MGEA5    | turquoise | 0.858  | 0.726  |
| MIA      | turquoise | -0.514 | -0.367 |
| MIA3     | turquoise | 0.868  | 0.846  |
| MIB1     | turquoise | 0.559  | 0.419  |
| MICAL3   | turquoise | -0.550 | -0.770 |
| MIIP     | turquoise | -0.891 | -0.702 |
| MINA     | turquoise | 0.389  | 0.820  |
| MINPP1   | turquoise | 0.724  | 0.290  |
| MIOS     | turquoise | 0.799  | 0.425  |
| MIR29B2  | turquoise | -0.815 | -0.882 |
| MIR628   | turquoise | 0.352  | 0.349  |
| MIR940   | turquoise | -0.831 | -0.539 |
| MIS18A   | turquoise | -0.734 | -0.775 |
| MKNK1    | turquoise | -0.870 | -0.824 |
| MKNK2    | turquoise | -0.555 | -0.691 |
| MKRN7P   | turquoise | -0.583 | -0.564 |
| MLXIP    | turquoise | -0.884 | -0.594 |
| MMADHC   | turquoise | 0.413  | 0.669  |
| MMP16    | turquoise | 0.894  | 0.827  |
| MMP25    | turquoise | -0.683 | -0.949 |
| MOB1B    | turquoise | 0.743  | 0.743  |
| MOB4     | turquoise | 0.951  | 0.973  |
| MON2     | turquoise | 0.863  | 0.681  |
| MORF4L1  | turquoise | 0.660  | 0.765  |
| MOSPD1   | turquoise | 0.697  | 0.768  |
| MPDU1    | turquoise | -0.612 | -0.685 |
| MPDZ     | turquoise | 0.585  | 0.526  |
| MPP5     | turquoise | 0.852  | 0.672  |
| MPP7     | turquoise | 0.688  | 0.910  |
| MRPL15   | turquoise | 0.328  | 0.819  |
| MRPL33   | turquoise | 0.548  | 0.728  |
| MRPL35   | turquoise | 0.763  | 0.907  |
| MRPL42   | turquoise | 0.802  | 0.902  |
| MRPL44   | turquoise | 0.596  | 0.855  |
| MRPL45P2 | turquoise | -0.470 | -0.842 |
| MRPL50   | turquoise | 0.556  | 0.603  |

|           |           |        |        |
|-----------|-----------|--------|--------|
| MRPS16    | turquoise | 0.862  | 0.847  |
| MRPS18B   | turquoise | -0.493 | -0.782 |
| MRPS22    | turquoise | 0.827  | 0.891  |
| MRPS26    | turquoise | -0.877 | -0.665 |
| MRPS27    | turquoise | 0.841  | 0.923  |
| MRPS30    | turquoise | 0.832  | 0.904  |
| MRPS35    | turquoise | 0.817  | 0.740  |
| MRPS5     | turquoise | -0.615 | -0.825 |
| MRPS9     | turquoise | 0.773  | 0.825  |
| MRS2      | turquoise | 0.811  | 0.862  |
| MRVI1-AS1 | turquoise | -0.775 | -0.608 |
| MSANTD3   | turquoise | 0.633  | 0.762  |
| MSH2      | turquoise | 0.673  | 0.915  |
| MSL1      | turquoise | 0.901  | 0.890  |
| MSRB2     | turquoise | -0.882 | -0.841 |
| MT3       | turquoise | -0.683 | -0.764 |
| MTMR12    | turquoise | 0.743  | 0.916  |
| MTMR2     | turquoise | 0.863  | 0.964  |
| MTMR6     | turquoise | 0.949  | 0.978  |
| MTMR7     | turquoise | 0.849  | 0.980  |
| MTMR9     | turquoise | 0.949  | 0.804  |
| MTPN      | turquoise | 0.898  | 0.956  |
| MTSS1L    | turquoise | -0.660 | -0.706 |
| MUC12     | turquoise | -0.768 | -0.658 |
| MUC6      | turquoise | -0.843 | -0.785 |
| MXD4      | turquoise | -0.904 | -0.824 |
| MYCBP2    | turquoise | 0.707  | 0.792  |
| MYEF2     | turquoise | 0.621  | 0.475  |
| MYO16-AS1 | turquoise | -0.420 | -0.566 |
| MYO5A     | turquoise | 0.760  | 0.906  |
| MYO5B     | turquoise | 0.765  | 0.853  |
| MYOZ1     | turquoise | -0.467 | -0.643 |
| MYOZ3     | turquoise | 0.443  | 0.676  |
| MYSM1     | turquoise | 0.848  | 0.922  |
| MZT1      | turquoise | 0.618  | 0.748  |
| MZT2B     | turquoise | -0.752 | -0.211 |
| N6AMT1    | turquoise | 0.709  | 0.782  |
| NAA10     | turquoise | -0.807 | -0.873 |
| NAA25     | turquoise | 0.860  | 0.688  |
| NAA30     | turquoise | 0.926  | 0.962  |
| NAF1      | turquoise | 0.912  | 0.872  |
| NALCN     | turquoise | 0.811  | 0.975  |
| NANP      | turquoise | 0.572  | 0.516  |
| NAPEPLD   | turquoise | 0.932  | 0.920  |
| NAPG      | turquoise | 0.870  | 0.966  |
| NARS2     | turquoise | 0.602  | 0.785  |
| NAV2-AS4  | turquoise | -0.813 | -0.723 |

|           |           |        |        |
|-----------|-----------|--------|--------|
| NAV2-AS5  | turquoise | -0.521 | -0.467 |
| NBEA      | turquoise | 0.810  | 0.954  |
| NBN       | turquoise | 0.869  | 0.817  |
| NBPF8     | turquoise | -0.753 | -0.736 |
| NCAM2     | turquoise | 0.882  | 0.945  |
| NCKAP1    | turquoise | 0.765  | 0.972  |
| NCL       | turquoise | -0.264 | -0.463 |
| NCOA2     | turquoise | 0.806  | 0.903  |
| NCOA4     | turquoise | 0.885  | 0.819  |
| NCOA7     | turquoise | 0.853  | 0.906  |
| NDFIP1    | turquoise | 0.861  | 0.926  |
| NDFIP2    | turquoise | 0.963  | 0.970  |
| NDNF      | turquoise | 0.494  | 0.366  |
| NDUFA9    | turquoise | 0.517  | 0.688  |
| NDUFAF3   | turquoise | -0.826 | -0.725 |
| NDUFAF4   | turquoise | 0.628  | 0.809  |
| NDUFB5    | turquoise | 0.296  | 0.755  |
| NDUFS1    | turquoise | 0.853  | 0.870  |
| NEGR1     | turquoise | 0.788  | 0.794  |
| NETO1     | turquoise | 0.814  | 0.924  |
| NEU3      | turquoise | 0.661  | 0.895  |
| NF1       | turquoise | 0.890  | 0.903  |
| NFKBIB    | turquoise | -0.641 | -0.871 |
| NFKBID    | turquoise | -0.729 | -0.613 |
| NFKBIL1   | turquoise | -0.530 | -0.770 |
| NGLY1     | turquoise | 0.751  | 0.635  |
| NINJ1     | turquoise | -0.532 | -0.624 |
| NIPA1     | turquoise | 0.791  | 0.964  |
| NIPA2     | turquoise | 0.737  | 0.960  |
| NIPSNAP3A | turquoise | 0.483  | 0.381  |
| NKAPL     | turquoise | -0.515 | -0.731 |
| NKIRAS2   | turquoise | -0.687 | -0.698 |
| NKRF      | turquoise | 0.755  | 0.866  |
| NLGN1     | turquoise | 0.811  | 0.723  |
| NLGN4X    | turquoise | 0.719  | 0.808  |
| NLN       | turquoise | 0.754  | 0.657  |
| NLRX1     | turquoise | -0.881 | -0.631 |
| NME3      | turquoise | -0.720 | -0.718 |
| NME4      | turquoise | -0.888 | -0.838 |
| NME6      | turquoise | -0.648 | -0.805 |
| NMNAT1    | turquoise | -0.340 | -0.917 |
| NMU       | turquoise | 0.487  | 0.556  |
| NOL11     | turquoise | 0.661  | 0.678  |
| NOL12     | turquoise | -0.818 | -0.840 |
| NOL3      | turquoise | -0.587 | -0.660 |
| NOL9      | turquoise | -0.629 | -0.422 |
| NOLC1     | turquoise | 0.540  | 0.744  |

|        |           |        |        |
|--------|-----------|--------|--------|
| NOM1   | turquoise | -0.656 | -0.946 |
| NOP2   | turquoise | -0.873 | -0.768 |
| NOXA1  | turquoise | -0.474 | -0.473 |
| NPFF   | turquoise | -0.664 | -0.665 |
| NPR3   | turquoise | 0.708  | 0.830  |
| NR1H3  | turquoise | -0.825 | -0.853 |
| NR1I3  | turquoise | -0.716 | -0.415 |
| NR2C2  | turquoise | 0.744  | 0.707  |
| NR2F1  | turquoise | -0.633 | -0.809 |
| NR3C1  | turquoise | 0.891  | 0.675  |
| NR3C2  | turquoise | 0.686  | 0.923  |
| NR4A3  | turquoise | 0.483  | 0.270  |
| NRAP   | turquoise | -0.554 | -0.722 |
| NRAS   | turquoise | 0.832  | 0.567  |
| NRCAM  | turquoise | 0.812  | 0.890  |
| NRG2   | turquoise | -0.619 | -0.876 |
| NRG3   | turquoise | 0.811  | 0.920  |
| NRIP1  | turquoise | 0.968  | 0.555  |
| NRIP3  | turquoise | 0.664  | 0.756  |
| NRN1L  | turquoise | -0.166 | -0.490 |
| NRXN3  | turquoise | 0.559  | 0.809  |
| NSD1   | turquoise | 0.825  | 0.773  |
| NT5C   | turquoise | -0.041 | -0.641 |
| NT5DC2 | turquoise | -0.591 | -0.683 |
| NTN5   | turquoise | -0.599 | -0.585 |
| NUAK1  | turquoise | 0.536  | 0.825  |
| NUDCD1 | turquoise | 0.829  | 0.745  |
| NUDT21 | turquoise | 0.957  | 0.997  |
| NUDT4  | turquoise | 0.781  | 0.687  |
| NUP133 | turquoise | 0.836  | 0.795  |
| NUP155 | turquoise | 0.844  | 0.759  |
| NUP50  | turquoise | 0.935  | 0.966  |
| NUPL1  | turquoise | 0.966  | 0.842  |
| NUPR1  | turquoise | -0.616 | -0.817 |
| NUS1   | turquoise | 0.920  | 0.943  |
| NUSAP1 | turquoise | -0.745 | -0.840 |
| NVL    | turquoise | -0.181 | -0.515 |
| NXF1   | turquoise | -0.822 | -0.528 |
| NXN    | turquoise | -0.621 | -0.661 |
| NXNL1  | turquoise | -0.602 | -0.441 |
| NXPH1  | turquoise | 0.763  | 0.772  |
| NXPH2  | turquoise | 0.769  | 0.796  |
| NYAP2  | turquoise | 0.715  | 0.564  |
| OCRL   | turquoise | 0.725  | 0.956  |
| ODF2   | turquoise | -0.722 | -0.430 |
| ODZ1   | turquoise | 0.972  | 0.643  |
| ODZ3   | turquoise | 0.727  | 0.885  |



|          |           |        |        |
|----------|-----------|--------|--------|
| OGT      | turquoise | 0.763  | 0.889  |
| OIP5-AS1 | turquoise | 0.778  | 0.882  |
| OPA1     | turquoise | 0.980  | 0.981  |
| OR10A2   | turquoise | -0.804 | -0.744 |
| OR7E14P  | turquoise | -0.463 | -0.768 |
| OR8S1    | turquoise | -0.500 | -0.819 |
| ORC3     | turquoise | 0.702  | 0.867  |
| ORC4     | turquoise | 0.895  | 0.954  |
| ORC5     | turquoise | 0.510  | 0.859  |
| ORMDL3   | turquoise | -0.596 | -0.529 |
| OSBPL1A  | turquoise | 0.829  | 0.728  |
| OSBPL3   | turquoise | 0.689  | 0.794  |
| OSBPL8   | turquoise | 0.924  | 0.845  |
| OSTM1    | turquoise | 0.713  | 0.457  |
| OTOGL    | turquoise | 0.504  | 0.563  |
| OTUD6B   | turquoise | 0.785  | 0.799  |
| OXCT1    | turquoise | 0.865  | 0.930  |
| OXER1    | turquoise | -0.964 | -0.612 |
| OXR1     | turquoise | 0.870  | 0.949  |
| P2RX4    | turquoise | -0.674 | -0.679 |
| P4HB     | turquoise | -0.693 | -0.465 |
| PABPC1L  | turquoise | -0.835 | -0.712 |
| PABPC4   | turquoise | -0.835 | -0.837 |
| PAF1     | turquoise | -0.829 | -0.644 |
| PAFAH1B1 | turquoise | 0.818  | 0.986  |
| PAFAH1B2 | turquoise | 0.832  | 0.883  |
| PAIP1    | turquoise | 0.665  | 0.492  |
| PALB2    | turquoise | 0.671  | 0.303  |
| PAM      | turquoise | 0.711  | 0.883  |
| PANK1    | turquoise | 0.790  | 0.931  |
| PANK3    | turquoise | 0.938  | 0.879  |
| PANX1    | turquoise | 0.851  | 0.872  |
| PAPOLG   | turquoise | 0.852  | 0.881  |
| PAQR3    | turquoise | 0.899  | 0.787  |
| PARG     | turquoise | 0.567  | 0.893  |
| PARK2    | turquoise | 0.611  | 0.890  |
| PARP11   | turquoise | 0.775  | 0.297  |
| PARP8    | turquoise | 0.881  | 0.795  |
| PBX1     | turquoise | 0.873  | 0.777  |
| PBX4     | turquoise | -0.694 | -0.849 |
| PCDHA3   | turquoise | 0.706  | 0.880  |
| PCDHAC1  | turquoise | 0.529  | 0.745  |
| PCDHB10  | turquoise | 0.622  | 0.518  |
| PCK2     | turquoise | -0.618 | -0.561 |
| PCMTD1   | turquoise | 0.844  | 0.788  |
| PCNP     | turquoise | 0.956  | 0.885  |
| PCNX     | turquoise | 0.890  | 0.787  |

|         |           |        |        |
|---------|-----------|--------|--------|
| PCSK4   | turquoise | -0.895 | -0.464 |
| PCYOX1  | turquoise | 0.858  | 0.883  |
| PDCD6IP | turquoise | 0.885  | 0.905  |
| PDDC1   | turquoise | -0.737 | -0.824 |
| PDE10A  | turquoise | 0.792  | 0.912  |
| PDE1A   | turquoise | 0.790  | 0.921  |
| PDIK1L  | turquoise | 0.834  | 0.811  |
| PK3     | turquoise | 0.899  | 0.782  |
| PDP1    | turquoise | 0.716  | 0.909  |
| PDSS2   | turquoise | 0.811  | 0.916  |
| PEAK1   | turquoise | 0.821  | 0.699  |
| PEG10   | turquoise | 0.594  | 0.908  |
| PEG3    | turquoise | 0.773  | 0.913  |
| PELP1   | turquoise | -0.625 | -0.788 |
| PENK    | turquoise | 0.699  | 0.638  |
| PEX10   | turquoise | -0.891 | -0.875 |
| PEX19   | turquoise | 0.813  | 0.938  |
| PEX3    | turquoise | 0.425  | 0.698  |
| PEX5L   | turquoise | 0.885  | 0.956  |
| PFDN2   | turquoise | -0.627 | -0.674 |
| PGA5    | turquoise | -0.838 | -0.604 |
| PGAP1   | turquoise | 0.953  | 0.798  |
| PGC     | turquoise | -0.863 | -0.537 |
| PGM2L1  | turquoise | 0.784  | 0.708  |
| PGPEP1  | turquoise | -0.346 | -0.841 |
| PGPEP1L | turquoise | -0.795 | -0.871 |
| PGRMC1  | turquoise | 0.902  | 0.808  |
| PGRMC2  | turquoise | 0.960  | 0.912  |
| PHF1    | turquoise | -0.630 | -0.803 |
| PHF13   | turquoise | 0.492  | 0.415  |
| PHF6    | turquoise | 0.859  | 0.870  |
| PHKB    | turquoise | 0.847  | 0.907  |
| PHLDA3  | turquoise | -0.629 | -0.522 |
| PHLDB3  | turquoise | -0.646 | -0.838 |
| PHLPP2  | turquoise | 0.577  | 0.964  |
| PHPT1   | turquoise | -0.842 | -0.536 |
| PHTF2   | turquoise | 0.882  | 0.823  |
| PHYHIPL | turquoise | 0.882  | 0.922  |
| PIAS1   | turquoise | 0.783  | 0.709  |
| PIAS2   | turquoise | 0.874  | 0.966  |
| PIAS3   | turquoise | 0.382  | 0.683  |
| PIGCP1  | turquoise | 0.492  | 0.913  |
| PIGH    | turquoise | 0.485  | 0.470  |
| PIGK    | turquoise | 0.921  | 0.972  |
| PIK3C3  | turquoise | 0.891  | 0.612  |
| PIK3CA  | turquoise | 0.934  | 0.668  |
| PIK3CB  | turquoise | 0.932  | 0.954  |

|           |           |        |        |
|-----------|-----------|--------|--------|
| PIK3R1    | turquoise | 0.871  | 0.915  |
| PIK3R4    | turquoise | 0.620  | 0.923  |
| PIKFYVE   | turquoise | 0.943  | 0.735  |
| PINK1-AS  | turquoise | -0.847 | -0.860 |
| PITPNB    | turquoise | 0.827  | 0.939  |
| PJA2      | turquoise | 0.815  | 0.981  |
| PKN1      | turquoise | -0.746 | -0.838 |
| PLA2G10   | turquoise | -0.784 | -0.482 |
| PLA2G12A  | turquoise | 0.887  | 0.851  |
| PLAA      | turquoise | 0.864  | 0.899  |
| PLAG1     | turquoise | 0.810  | 0.439  |
| PLCD3     | turquoise | -0.796 | -0.859 |
| PLCD4     | turquoise | -0.663 | -0.654 |
| PLCH1     | turquoise | 0.871  | 0.828  |
| PLCL2     | turquoise | 0.778  | 0.889  |
| PLCXD3    | turquoise | 0.781  | 0.833  |
| PLD5      | turquoise | 0.765  | 0.914  |
| PLDN      | turquoise | 0.781  | 0.780  |
| PLEKHA1   | turquoise | 0.727  | 0.824  |
| PLEKHA2   | turquoise | 0.774  | 0.813  |
| PLEKHA8   | turquoise | 0.811  | 0.675  |
| PLEKHA8P1 | turquoise | 0.724  | 0.449  |
| PLEKHO1   | turquoise | -0.592 | -0.942 |
| PLGLB1    | turquoise | -0.766 | -0.360 |
| PLK1      | turquoise | -0.883 | -0.680 |
| PLK4      | turquoise | 0.842  | 0.619  |
| PLK5      | turquoise | -0.762 | -0.635 |
| PLSCR3    | turquoise | -0.916 | -0.739 |
| PLXNB2    | turquoise | -0.816 | -0.604 |
| PLXNC1    | turquoise | 0.664  | 0.910  |
| PMF1      | turquoise | -0.436 | -0.534 |
| PMS2      | turquoise | 0.845  | 0.679  |
| PMVK      | turquoise | -0.672 | -0.801 |
| PNMA2     | turquoise | 0.722  | 0.946  |
| PNPLA2    | turquoise | -0.669 | -0.723 |
| POC5      | turquoise | 0.562  | 0.302  |
| PODNL1    | turquoise | -0.770 | -0.814 |
| POLR2B    | turquoise | 0.673  | 0.960  |
| POLR2D    | turquoise | 0.864  | 0.861  |
| POLR2H    | turquoise | -0.733 | -0.479 |
| POLR2J    | turquoise | -0.541 | -0.581 |
| POLR2J3   | turquoise | -0.546 | -0.536 |
| POLR2J4   | turquoise | -0.949 | -0.498 |
| POLR3A    | turquoise | 0.490  | 0.824  |
| POLR3B    | turquoise | 0.891  | 0.942  |
| POM121C   | turquoise | 0.335  | 0.683  |
| POM121L9P | turquoise | -0.706 | -0.650 |

|              |           |        |        |
|--------------|-----------|--------|--------|
| POPDC3       | turquoise | 0.473  | 0.768  |
| POR          | turquoise | -0.677 | -0.628 |
| PPA2         | turquoise | 0.687  | 0.373  |
| PPARGC1A     | turquoise | 0.811  | 0.721  |
| PPIP5K2      | turquoise | 0.968  | 0.943  |
| PPM1A        | turquoise | 0.950  | 0.987  |
| PPM1G        | turquoise | -0.742 | -0.721 |
| PPM1L        | turquoise | 0.940  | 0.988  |
| PPP1CB       | turquoise | 0.788  | 0.564  |
| PPP1R12B     | turquoise | 0.924  | 0.930  |
| PPP1R14D     | turquoise | -0.778 | -0.281 |
| PPP1R1B      | turquoise | -0.663 | -0.777 |
| PPP1R2       | turquoise | 0.899  | 0.826  |
| PPP1R21      | turquoise | 0.345  | 0.799  |
| PPP1R2P3     | turquoise | 0.574  | 0.930  |
| PPP1R35      | turquoise | -0.514 | -0.681 |
| PPP2R2A      | turquoise | 0.890  | 0.889  |
| PPP2R2B      | turquoise | 0.723  | 0.853  |
| PPP2R5C      | turquoise | 0.914  | 0.805  |
| PPP4C        | turquoise | -0.846 | -0.757 |
| PPP6C        | turquoise | 0.894  | 0.863  |
| PPT1         | turquoise | 0.655  | 0.915  |
| PPTC7        | turquoise | 0.828  | 0.599  |
| PQBP1        | turquoise | -0.756 | -0.501 |
| PQLC2        | turquoise | -0.650 | -0.649 |
| PRDM10       | turquoise | 0.673  | 0.892  |
| PREPL        | turquoise | 0.951  | 0.952  |
| PRG4         | turquoise | 0.632  | 0.741  |
| PRICKLE1     | turquoise | 0.647  | 0.889  |
| PRICKLE2     | turquoise | 0.884  | 0.825  |
| PRICKLE2-AS3 | turquoise | -0.653 | -0.897 |
| PRKAA2       | turquoise | 0.782  | 0.380  |
| PRKAB2       | turquoise | 0.910  | 0.875  |
| PRKAR1A      | turquoise | 0.681  | 0.987  |
| PRKCE        | turquoise | 0.627  | 0.945  |
| PRKCI        | turquoise | 0.866  | 0.908  |
| PRKDC        | turquoise | 0.924  | 0.896  |
| PRKRIP1      | turquoise | -0.861 | -0.869 |
| PRKRIR       | turquoise | 0.865  | 0.569  |
| PRNP         | turquoise | 0.608  | 0.944  |
| PROCA1       | turquoise | -0.904 | -0.735 |
| PROM1        | turquoise | 0.615  | 0.685  |
| PRPF31       | turquoise | -0.903 | -0.851 |
| PRR11        | turquoise | 0.448  | 0.384  |
| PRR14L       | turquoise | 0.527  | 0.903  |
| PRR22        | turquoise | -0.477 | -0.663 |
| PRR25        | turquoise | -0.787 | -0.548 |

|           |           |        |        |
|-----------|-----------|--------|--------|
| PRUNE2    | turquoise | 0.843  | 0.952  |
| PSG5      | turquoise | -0.609 | -0.579 |
| PSMC2     | turquoise | 0.559  | 0.823  |
| PSMC6     | turquoise | 0.633  | 0.750  |
| PSMD11    | turquoise | 0.563  | 0.390  |
| PSME3     | turquoise | 0.873  | 0.892  |
| PSMG1     | turquoise | 0.779  | 0.630  |
| PSMG4     | turquoise | -0.659 | -0.809 |
| PSPN      | turquoise | -0.284 | -0.541 |
| PTBP2     | turquoise | 0.890  | 0.848  |
| PTBP3     | turquoise | 0.867  | 0.744  |
| PTCD2     | turquoise | 0.874  | 0.955  |
| PTCHD2    | turquoise | -0.552 | -0.529 |
| PTDSS2    | turquoise | -0.747 | -0.649 |
| PTEN      | turquoise | 0.940  | 0.893  |
| PTENP1    | turquoise | 0.910  | 0.912  |
| PTGES3    | turquoise | 0.892  | 0.868  |
| PTGIR     | turquoise | -0.529 | -0.566 |
| PTGR1     | turquoise | 0.783  | 0.352  |
| PTH1R     | turquoise | -0.866 | -0.362 |
| PTP4A1    | turquoise | 0.898  | 0.759  |
| PTPLAD1   | turquoise | 0.795  | 0.724  |
| PTPLB     | turquoise | 0.840  | 0.886  |
| PTPMT1    | turquoise | -0.775 | -0.210 |
| PTPN11    | turquoise | 0.813  | 0.702  |
| PTPN18    | turquoise | -0.774 | -0.636 |
| PTPN3     | turquoise | 0.501  | 0.917  |
| PTPN4     | turquoise | 0.891  | 0.958  |
| PTPRD     | turquoise | 0.836  | 0.917  |
| PTPRR     | turquoise | 0.691  | 0.853  |
| PTPRT     | turquoise | 0.554  | 0.855  |
| PUM2      | turquoise | 0.835  | 0.967  |
| PURA      | turquoise | -0.677 | -0.867 |
| PURB      | turquoise | 0.767  | 0.744  |
| PUS1      | turquoise | -0.834 | -0.604 |
| PUS7      | turquoise | 0.672  | 0.450  |
| PYCR1     | turquoise | -0.752 | -0.614 |
| QPCTL     | turquoise | -0.815 | -0.767 |
| QRICH2    | turquoise | -0.831 | -0.674 |
| QTRT1     | turquoise | -0.803 | -0.605 |
| RAB10     | turquoise | 0.736  | 0.908  |
| RAB11FIP2 | turquoise | 0.894  | 0.714  |
| RAB12     | turquoise | 0.573  | 0.863  |
| RAB13     | turquoise | -0.701 | -0.918 |
| RAB14     | turquoise | 0.924  | 0.968  |
| RAB18     | turquoise | 0.883  | 0.642  |
| RAB1A     | turquoise | 0.491  | 0.700  |

|          |           |        |        |
|----------|-----------|--------|--------|
| RAB22A   | turquoise | 0.959  | 0.908  |
| RAB23    | turquoise | 0.835  | 0.782  |
| RAB2A    | turquoise | 0.840  | 0.790  |
| RAB39B   | turquoise | 0.923  | 0.976  |
| RAB3GAP1 | turquoise | 0.796  | 0.972  |
| RAB3GAP2 | turquoise | 0.972  | 0.505  |
| RAB40A   | turquoise | 0.470  | 0.451  |
| RAB4A    | turquoise | 0.357  | 0.808  |
| RAB6A    | turquoise | 0.891  | 0.909  |
| RAB8B    | turquoise | 0.886  | 0.738  |
| RABEP1   | turquoise | 0.910  | 0.736  |
| RABGAP1  | turquoise | 0.832  | 0.340  |
| RABGAP1L | turquoise | 0.936  | 0.965  |
| RABL2A   | turquoise | -0.412 | -0.409 |
| RACGAP1  | turquoise | 0.667  | 0.898  |
| RAD17    | turquoise | 0.869  | 0.950  |
| RAD18    | turquoise | 0.517  | 0.791  |
| RAET1E   | turquoise | -0.638 | -0.775 |
| RALGAPB  | turquoise | 0.968  | 0.871  |
| RALGPS1  | turquoise | 0.503  | 0.930  |
| RALGPS2  | turquoise | 0.961  | 0.976  |
| RALY     | turquoise | -0.533 | -0.600 |
| RAMP1    | turquoise | -0.889 | -0.897 |
| RANBP2   | turquoise | 0.960  | 0.874  |
| RANBP6   | turquoise | 0.925  | 0.963  |
| RAP1GDS1 | turquoise | 0.799  | 0.932  |
| RAP2A    | turquoise | 0.982  | 0.923  |
| RAPGEF2  | turquoise | 0.902  | 0.958  |
| RAPH1    | turquoise | 0.818  | 0.753  |
| RASA1    | turquoise | 0.829  | 0.940  |
| RASA2    | turquoise | 0.810  | 0.709  |
| RASAL2   | turquoise | 0.743  | 0.923  |
| RASGRP4  | turquoise | -0.691 | -0.881 |
| RASSF3   | turquoise | 0.699  | 0.730  |
| RBBP5    | turquoise | 0.792  | 0.938  |
| RBCK1    | turquoise | -0.670 | -0.658 |
| RBM18    | turquoise | 0.787  | 0.916  |
| RBM20    | turquoise | 0.507  | 0.539  |
| RBM45    | turquoise | 0.536  | 0.747  |
| RBM4B    | turquoise | -0.520 | -0.895 |
| RBP1     | turquoise | -0.742 | -0.773 |
| RBPMS2   | turquoise | -0.425 | -0.465 |
| RC3H2    | turquoise | 0.906  | 0.902  |
| RCHY1    | turquoise | 0.705  | 0.776  |
| RCN2     | turquoise | 0.773  | 0.755  |
| RCOR3    | turquoise | 0.717  | 0.756  |
| RCSD1    | turquoise | 0.507  | 0.334  |

|                |           |        |        |
|----------------|-----------|--------|--------|
| RDH5           | turquoise | -0.639 | -0.856 |
| REC8           | turquoise | -0.871 | -0.431 |
| RECQL5         | turquoise | -0.794 | -0.494 |
| REEP5          | turquoise | 0.540  | 0.897  |
| REEP6          | turquoise | -0.712 | -0.729 |
| REPS1          | turquoise | -0.610 | -0.505 |
| RFC3           | turquoise | 0.643  | 0.700  |
| RFK            | turquoise | 0.841  | 0.806  |
| RFX1           | turquoise | -0.669 | -0.523 |
| RGP1           | turquoise | 0.621  | 0.878  |
| RGS7BP         | turquoise | 0.951  | 0.952  |
| RHBDD3         | turquoise | -0.736 | -0.818 |
| RHOBTB1        | turquoise | 0.422  | 0.830  |
| RHOT1          | turquoise | 0.810  | 0.828  |
| RHOT1P3        | turquoise | 0.822  | 0.904  |
| RING1          | turquoise | -0.820 | -0.913 |
| RLIM           | turquoise | 0.986  | 0.884  |
| RMND5A         | turquoise | 0.750  | 0.980  |
| RNASL          | turquoise | 0.522  | 0.542  |
| RND2           | turquoise | -0.625 | -0.791 |
| RNF11          | turquoise | 0.784  | 0.830  |
| RNF135         | turquoise | -0.615 | -0.764 |
| RNF14          | turquoise | 0.710  | 0.936  |
| RNF150         | turquoise | 0.832  | 0.199  |
| RNF168         | turquoise | -0.637 | -0.709 |
| RNF180         | turquoise | 0.950  | 0.721  |
| RNF20          | turquoise | -0.518 | -0.812 |
| RNF216P1       | turquoise | -0.830 | -0.718 |
| RNF38          | turquoise | 0.582  | 0.984  |
| RNGTT          | turquoise | 0.985  | 0.958  |
| RNPEPL1        | turquoise | -0.722 | -0.350 |
| ROBO2          | turquoise | 0.818  | 0.897  |
| RP11-100G15.7  | turquoise | -0.727 | -0.754 |
| RP11-102L12.2  | turquoise | 0.617  | 0.647  |
| RP11-1085N6.2  | turquoise | 0.549  | 0.441  |
| RP11-126H7.3   | turquoise | -0.546 | -0.438 |
| RP11-1277A3.1  | turquoise | -0.659 | -0.776 |
| RP11-1277A3.2  | turquoise | -0.864 | -0.738 |
| RP11-1379J22.2 | turquoise | -0.851 | -0.780 |
| RP11-148K14.2  | turquoise | -0.678 | -0.660 |
| RP11-158M2.3   | turquoise | -0.697 | -0.600 |
| RP11-163E9.1   | turquoise | -0.568 | -0.932 |
| RP1-117O3.2    | turquoise | -0.434 | -0.362 |
| RP11-182J1.9   | turquoise | -0.334 | -0.414 |
| RP11-184I16.2  | turquoise | -0.662 | -0.559 |
| RP11-206L10.11 | turquoise | 0.679  | 0.930  |
| RP11-219B17.1  | turquoise | -0.705 | -0.868 |

|               |           |        |        |
|---------------|-----------|--------|--------|
| RP11-220I1.1  | turquoise | 0.901  | 0.909  |
| RP11-247I13.7 | turquoise | 0.621  | 0.934  |
| RP11-266K22.2 | turquoise | -0.677 | -0.775 |
| RP11-293M10.5 | turquoise | -0.557 | -0.696 |
| RP11-296I10.3 | turquoise | -0.594 | -0.735 |
| RP11-311D14.2 | turquoise | -0.796 | -0.801 |
| RP11-326F20.5 | turquoise | -0.553 | -0.344 |
| RP11-355I22.5 | turquoise | 0.568  | 0.554  |
| RP11-364C11.2 | turquoise | -0.688 | -0.663 |
| RP11-365O16.6 | turquoise | -0.617 | -0.742 |
| RP11-368P15.3 | turquoise | -0.659 | -0.778 |
| RP11-396K3.1  | turquoise | 0.622  | 0.550  |
| RP11-397O8.4  | turquoise | 0.642  | 0.685  |
| RP11-402G3.3  | turquoise | -0.817 | -0.709 |
| RP11-420G6.4  | turquoise | 0.502  | 0.704  |
| RP11-439E19.8 | turquoise | -0.838 | -0.397 |
| RP11-439L18.3 | turquoise | -0.615 | -0.905 |
| RP11-443A13.3 | turquoise | -0.816 | -0.859 |
| RP11-447D11.2 | turquoise | -0.491 | -0.581 |
| RP11-455B2.8  | turquoise | -0.729 | -0.965 |
| RP11-462C24.1 | turquoise | -0.516 | -0.603 |
| RP11-473M20.5 | turquoise | -0.789 | -0.581 |
| RP11-492E3.1  | turquoise | -0.611 | -0.883 |
| RP1-149A16.17 | turquoise | -0.601 | -0.926 |
| RP11-500G10.1 | turquoise | -0.741 | -0.530 |
| RP11-503N18.3 | turquoise | -0.695 | -0.661 |
| RP11-504G3.1  | turquoise | -0.588 | -0.684 |
| RP11-513G11.1 | turquoise | -0.564 | -0.510 |
| RP11-534G20.3 | turquoise | 0.605  | 0.615  |
| RP11-537A6.9  | turquoise | -0.526 | -0.755 |
| RP11-540A21.2 | turquoise | -0.668 | -0.881 |
| RP11-544A12.8 | turquoise | -0.639 | -0.757 |
| RP11-545E17.3 | turquoise | -0.691 | -0.567 |
| RP11-550I24.2 | turquoise | 0.467  | 0.702  |
| RP11-561C5.4  | turquoise | -0.544 | -0.591 |
| RP11-582J16.5 | turquoise | -0.688 | -0.785 |
| RP11-605F22.2 | turquoise | 0.925  | 0.494  |
| RP11-611E13.2 | turquoise | -0.503 | -0.334 |
| RP11-613D13.2 | turquoise | -0.550 | -0.612 |
| RP11-617F23.1 | turquoise | -0.824 | -0.741 |
| RP11-627G23.1 | turquoise | -0.437 | -0.515 |
| RP11-644F5.11 | turquoise | -0.431 | -0.657 |
| RP11-654A16.3 | turquoise | -0.772 | -0.882 |
| RP11-66N24.4  | turquoise | -0.879 | -0.816 |
| RP11-680A11.5 | turquoise | -0.456 | -0.632 |
| RP11-686G8.2  | turquoise | -0.633 | -0.592 |
| RP11-693N9.2  | turquoise | -0.196 | -0.692 |



|               |           |        |        |
|---------------|-----------|--------|--------|
| RP11-69E11.4  | turquoise | -0.819 | -0.787 |
| RP11-701P16.1 | turquoise | -0.759 | -0.746 |
| RP11-702L15.2 | turquoise | -0.722 | -0.836 |
| RP11-70F11.6  | turquoise | 0.759  | 0.700  |
| RP11-728F11.4 | turquoise | -0.338 | -0.562 |
| RP11-74C13.3  | turquoise | -0.731 | -0.565 |
| RP11-752G15.9 | turquoise | -0.639 | -0.436 |
| RP11-761I4.3  | turquoise | 0.332  | 0.513  |
| RP11-766N7.3  | turquoise | 0.360  | 0.521  |
| RP1-177G6.2   | turquoise | -0.752 | -0.796 |
| RP11-785H5.2  | turquoise | -0.472 | -0.823 |
| RP11-791G16.2 | turquoise | -0.511 | -0.805 |
| RP11-82I10.1  | turquoise | -0.746 | -0.470 |
| RP11-849H4.2  | turquoise | -0.538 | -0.798 |
| RP11-867G23.3 | turquoise | -0.719 | -0.875 |
| RP11-874J12.2 | turquoise | -0.810 | -0.914 |
| RP1-239B22.1  | turquoise | 0.684  | 0.899  |
| RP1-278C19.3  | turquoise | -0.537 | -0.605 |
| RP1-310O13.7  | turquoise | -0.758 | -0.712 |
| RP1-33E13.1   | turquoise | -0.827 | -0.668 |
| RP13-512J5.1  | turquoise | -0.315 | -0.517 |
| RP1-59D14.3   | turquoise | -0.759 | -0.832 |
| RP1-80B9.2    | turquoise | -0.700 | -0.620 |
| RP3-402G11.5  | turquoise | -0.801 | -0.680 |
| RP3-417O22.3  | turquoise | 0.665  | 0.824  |
| RP3-508I15.9  | turquoise | -0.636 | -0.569 |
| RP3-510O8.4   | turquoise | -0.899 | -0.835 |
| RP3-511B24.5  | turquoise | -0.586 | -0.827 |
| RP3-523C21.1  | turquoise | 0.468  | 0.720  |
| RP4-584D14.5  | turquoise | 0.529  | 0.577  |
| RP4-657D16.3  | turquoise | -0.707 | -0.824 |
| RP4-695O20_B. | turquoise | -0.863 | -0.593 |
| RP4-798A10.2  | turquoise | -0.874 | -0.793 |
| RP4-803J11.2  | turquoise | -0.535 | -0.842 |
| RP4-805N21.1  | turquoise | -0.294 | -0.626 |
| RP5-1033H22.2 | turquoise | -0.566 | -0.487 |
| RP5-1068E13.3 | turquoise | 0.599  | 0.623  |
| RP5-1071N3.1  | turquoise | -0.866 | -0.861 |
| RP5-1074L1.1  | turquoise | -0.522 | -0.886 |
| RP5-1180C10.2 | turquoise | -0.502 | -0.431 |
| RP5-1187M17.7 | turquoise | -0.713 | -0.892 |
| RP5-839B4.7   | turquoise | 0.565  | 0.532  |
| RP5-864K19.4  | turquoise | -0.620 | -0.565 |
| RP5-981O7.2   | turquoise | -0.843 | -0.575 |
| RP6-109B7.3   | turquoise | -0.675 | -0.435 |
| RP9           | turquoise | -0.747 | -0.816 |
| RP9P          | turquoise | -0.647 | -0.864 |

|           |           |        |        |
|-----------|-----------|--------|--------|
| RPA3      | turquoise | 0.604  | 0.836  |
| RPAP3     | turquoise | 0.801  | 0.446  |
| RPE       | turquoise | 0.919  | 0.931  |
| RPGRIP1L  | turquoise | 0.845  | 0.883  |
| RPIA      | turquoise | -0.624 | -0.776 |
| RPL12     | turquoise | -0.482 | -0.485 |
| RPL13     | turquoise | -0.570 | -0.696 |
| RPL13A    | turquoise | -0.805 | -0.830 |
| RPL18     | turquoise | -0.785 | -0.812 |
| RPL32P3   | turquoise | -0.761 | -0.748 |
| RPP30     | turquoise | 0.713  | 0.769  |
| RPP40     | turquoise | 0.368  | 0.780  |
| RPRD1A    | turquoise | 0.946  | 0.958  |
| RPS11     | turquoise | -0.870 | -0.625 |
| RPS14     | turquoise | -0.917 | -0.490 |
| RPS15AP10 | turquoise | -0.737 | -0.886 |
| RPS16     | turquoise | -0.510 | -0.463 |
| RPS18     | turquoise | -0.800 | -0.409 |
| RPS19     | turquoise | -0.475 | -0.577 |
| RPS21     | turquoise | -0.352 | -0.230 |
| RPS6KA3   | turquoise | 0.817  | 0.864  |
| RPS6KC1   | turquoise | 0.743  | 0.873  |
| RPS9      | turquoise | -0.504 | -0.716 |
| RPUSD3    | turquoise | -0.848 | -0.743 |
| RRAGB     | turquoise | 0.721  | 0.932  |
| RRAGD     | turquoise | 0.872  | 0.815  |
| RRAS      | turquoise | -0.844 | -0.817 |
| RRM1      | turquoise | 0.857  | 0.940  |
| RRM2B     | turquoise | 0.822  | 0.751  |
| RSL24D1   | turquoise | 0.723  | 0.718  |
| RSPO4     | turquoise | -0.674 | -0.225 |
| RTCD1     | turquoise | 0.846  | 0.906  |
| RTL1      | turquoise | -0.671 | -0.506 |
| RTN3      | turquoise | 0.822  | 0.847  |
| RUFY1     | turquoise | -0.800 | -0.942 |
| RUFY3     | turquoise | 0.941  | 0.971  |
| RYR1      | turquoise | -0.834 | -0.700 |
| S100A13   | turquoise | -0.650 | -0.910 |
| S100A14   | turquoise | -0.626 | -0.600 |
| S100A16   | turquoise | -0.699 | -0.847 |
| S1PR2     | turquoise | -0.716 | -0.451 |
| SACM1L    | turquoise | 0.893  | 0.886  |
| SACS      | turquoise | 0.951  | 0.940  |
| SAFB2     | turquoise | -0.649 | -0.958 |
| SAMD12    | turquoise | 0.938  | 0.971  |
| SAMD13    | turquoise | 0.591  | 0.656  |
| SAMD4B    | turquoise | -0.270 | -0.761 |

|          |           |        |        |
|----------|-----------|--------|--------|
| SAP30BP  | turquoise | -0.645 | -0.657 |
| SAP30L   | turquoise | 0.776  | 0.776  |
| SAR1A    | turquoise | 0.909  | 0.655  |
| SARDH    | turquoise | -0.617 | -0.516 |
| SART1    | turquoise | -0.835 | -0.567 |
| SART3    | turquoise | -0.817 | -0.847 |
| SC5DL    | turquoise | 0.887  | 0.905  |
| SCAI     | turquoise | 0.775  | 0.786  |
| SCAMP1   | turquoise | 0.969  | 0.983  |
| SCARNA7  | turquoise | -0.559 | -0.156 |
| SCFD1    | turquoise | 0.805  | 0.709  |
| SCIMP    | turquoise | -0.828 | -0.630 |
| SCN1A    | turquoise | 0.839  | 0.952  |
| SCNM1    | turquoise | -0.401 | -0.492 |
| SCO1     | turquoise | 0.502  | 0.942  |
| SCOC     | turquoise | 0.798  | 0.866  |
| SCPEP1   | turquoise | -0.647 | -0.521 |
| SCRIB    | turquoise | -0.595 | -0.751 |
| SCRN1    | turquoise | 0.861  | 0.955  |
| SCRN3    | turquoise | 0.852  | 0.902  |
| SCUBE3   | turquoise | -0.851 | -0.844 |
| SCYL2    | turquoise | 0.948  | 0.708  |
| SDCCAG3  | turquoise | -0.486 | -0.570 |
| SDHC     | turquoise | 0.875  | 0.844  |
| SDR9C7   | turquoise | -0.477 | -0.612 |
| SEC14L2  | turquoise | -0.404 | -0.808 |
| SEC14L4  | turquoise | -0.524 | -0.709 |
| SEC22A   | turquoise | 0.717  | 0.866  |
| SEC22B   | turquoise | 0.826  | 0.844  |
| SEC23A   | turquoise | 0.789  | 0.969  |
| SEC23IP  | turquoise | 0.811  | 0.651  |
| SEC61A2  | turquoise | 0.615  | 0.931  |
| SEL1L    | turquoise | 0.937  | 0.853  |
| SELRC1   | turquoise | 0.519  | 0.802  |
| SEMA3A   | turquoise | 0.479  | 0.689  |
| SENP2    | turquoise | 0.817  | 0.958  |
| SENP5    | turquoise | 0.495  | 0.835  |
| SENP8    | turquoise | 0.764  | 0.582  |
| SERAC1   | turquoise | 0.694  | 0.868  |
| SERF2    | turquoise | -0.825 | -0.822 |
| SERINC1  | turquoise | 0.731  | 0.934  |
| SERINC3  | turquoise | 0.859  | 0.957  |
| SERPING1 | turquoise | -0.646 | -0.684 |
| SERPINH1 | turquoise | -0.682 | -0.655 |
| SERTAD1  | turquoise | -0.741 | -0.755 |
| SESN3    | turquoise | 0.764  | 0.924  |
| SETBP1   | turquoise | 0.438  | 0.707  |

|          |           |        |        |
|----------|-----------|--------|--------|
| SETD7    | turquoise | 0.833  | 0.737  |
| SETDB2   | turquoise | 0.806  | 0.797  |
| SEZ6L    | turquoise | 0.820  | 0.906  |
| SF3B2    | turquoise | -0.847 | -0.662 |
| SFSWAP   | turquoise | -0.639 | -0.944 |
| SGIP1    | turquoise | 0.942  | 0.961  |
| SGTB     | turquoise | 0.945  | 0.902  |
| SH2B2    | turquoise | -0.695 | -0.911 |
| SH3BGRL  | turquoise | 0.764  | 0.536  |
| SH3YL1   | turquoise | 0.611  | 0.597  |
| SHC3     | turquoise | 0.562  | 0.303  |
| SHROOM2  | turquoise | 0.596  | 0.839  |
| SIAE     | turquoise | 0.796  | 0.824  |
| SIAH1    | turquoise | -0.631 | -0.852 |
| SIGLEC5  | turquoise | -0.213 | -0.547 |
| SIKE1    | turquoise | 0.824  | 0.777  |
| SIRT5    | turquoise | 0.663  | 0.785  |
| SIRT7    | turquoise | -0.885 | -0.450 |
| SKIL     | turquoise | 0.887  | 0.705  |
| SKIV2L2  | turquoise | 0.807  | 0.831  |
| SLA2     | turquoise | -0.582 | -0.643 |
| SLC10A4  | turquoise | 0.619  | 0.735  |
| SLC12A6  | turquoise | 0.702  | 0.951  |
| SLC16A13 | turquoise | -0.699 | -0.479 |
| SLC16A2  | turquoise | 0.479  | 0.785  |
| SLC16A7  | turquoise | 0.902  | 0.735  |
| SLC17A5  | turquoise | 0.668  | 0.612  |
| SLC18A2  | turquoise | 0.628  | 0.593  |
| SLC19A1  | turquoise | -0.613 | -0.625 |
| SLC23A3  | turquoise | -0.513 | -0.592 |
| SLC25A1  | turquoise | -0.697 | -0.928 |
| SLC25A16 | turquoise | 0.604  | 0.764  |
| SLC25A24 | turquoise | 0.772  | 0.520  |
| SLC25A28 | turquoise | -0.698 | -0.917 |
| SLC25A32 | turquoise | 0.852  | 0.760  |
| SLC25A34 | turquoise | -0.587 | -0.835 |
| SLC25A36 | turquoise | 0.882  | 0.722  |
| SLC25A37 | turquoise | -0.597 | -0.686 |
| SLC25A39 | turquoise | -0.800 | -0.794 |
| SLC25A40 | turquoise | 0.899  | 0.971  |
| SLC25A41 | turquoise | -0.458 | -0.650 |
| SLC25A46 | turquoise | 0.866  | 0.980  |
| SLC27A3  | turquoise | -0.896 | -0.562 |
| SLC27A5  | turquoise | -0.696 | -0.697 |
| SLC2A4RG | turquoise | -0.697 | -0.661 |
| SLC30A4  | turquoise | 0.788  | 0.931  |
| SLC30A9  | turquoise | 0.912  | 0.970  |

|          |           |        |        |
|----------|-----------|--------|--------|
| SLC35A5  | turquoise | 0.852  | 0.806  |
| SLC35B4  | turquoise | 0.914  | 0.953  |
| SLC35F1  | turquoise | 0.681  | 0.835  |
| SLC35G5  | turquoise | -0.868 | -0.913 |
| SLC36A1  | turquoise | 0.668  | 0.906  |
| SLC38A1  | turquoise | 0.863  | 0.662  |
| SLC38A10 | turquoise | -0.650 | -0.305 |
| SLC39A5  | turquoise | -0.602 | -0.704 |
| SLC39A6  | turquoise | 0.776  | 0.773  |
| SLC39A9  | turquoise | 0.696  | 0.826  |
| SLC41A2  | turquoise | 0.864  | 0.720  |
| SLC4A11  | turquoise | -0.789 | -0.819 |
| SLC4A8   | turquoise | 0.878  | 0.901  |
| SLC52A1  | turquoise | -0.737 | -0.862 |
| SLC52A2  | turquoise | -0.781 | -0.420 |
| SLC5A3   | turquoise | 0.820  | 0.656  |
| SLC6A12  | turquoise | -0.435 | -0.636 |
| SLC6A15  | turquoise | 0.955  | 0.963  |
| SLC8A1   | turquoise | 0.515  | 0.891  |
| SLC9A6   | turquoise | 0.816  | 0.975  |
| SLC9A7   | turquoise | 0.934  | 0.912  |
| SLC9A7P1 | turquoise | 0.688  | 0.848  |
| SLC9C2   | turquoise | -0.547 | -0.537 |
| SLCO5A1  | turquoise | -0.502 | -0.784 |
| SLFNL1   | turquoise | -0.844 | -0.804 |
| SLITRK1  | turquoise | 0.670  | 0.933  |
| SLITRK3  | turquoise | 0.831  | 0.945  |
| SLMO1    | turquoise | -0.790 | -0.410 |
| SMARCAD1 | turquoise | 0.898  | 0.872  |
| SMARCB1  | turquoise | -0.804 | -0.470 |
| SMG6     | turquoise | -0.762 | -0.700 |
| SMPD2    | turquoise | -0.856 | -0.571 |
| SNHG3    | turquoise | -0.720 | -0.818 |
| SNHG7    | turquoise | -0.733 | -0.798 |
| SNORA70G | turquoise | -0.580 | -0.829 |
| SNORA76  | turquoise | -0.512 | -0.769 |
| SNORD64  | turquoise | 0.285  | 0.699  |
| SNORD70  | turquoise | -0.519 | -0.757 |
| snoU13   | turquoise | 0.867  | 0.823  |
| SNRK     | turquoise | 0.811  | 0.894  |
| SNURF    | turquoise | -0.567 | -0.918 |
| SNX12    | turquoise | 0.729  | 0.937  |
| SNX13    | turquoise | 0.947  | 0.755  |
| SNX14    | turquoise | 0.823  | 0.849  |
| SNX19    | turquoise | 0.752  | 0.709  |
| SNX25    | turquoise | 0.724  | 0.714  |
| SNX30    | turquoise | 0.747  | 0.953  |

|          |           |        |        |
|----------|-----------|--------|--------|
| SNX4     | turquoise | 0.903  | 0.754  |
| SNX7     | turquoise | 0.920  | 0.696  |
| SOCS5    | turquoise | 0.803  | 0.939  |
| SOCS7    | turquoise | 0.709  | 0.853  |
| SOLH     | turquoise | -0.597 | -0.552 |
| SORL1    | turquoise | 0.758  | 0.916  |
| SOS1     | turquoise | 0.921  | 0.818  |
| SP140    | turquoise | -0.327 | -0.661 |
| SP8      | turquoise | 0.734  | 0.445  |
| SPAST    | turquoise | 0.926  | 0.862  |
| SPATA21  | turquoise | -0.707 | -0.605 |
| SPATA7   | turquoise | 0.916  | 0.593  |
| SPCS3    | turquoise | 0.933  | 0.941  |
| SPDYE1   | turquoise | -0.830 | -0.611 |
| SPIN1    | turquoise | 0.935  | 0.962  |
| SPIN3    | turquoise | 0.662  | 0.928  |
| SPIRE1   | turquoise | 0.928  | 0.594  |
| SPPL3    | turquoise | 0.788  | 0.727  |
| SPRYD4   | turquoise | -0.749 | -0.603 |
| SPSB2    | turquoise | -0.443 | -0.624 |
| SQRDL    | turquoise | -0.557 | -0.706 |
| SRA1     | turquoise | -0.703 | -0.597 |
| SRP19    | turquoise | 0.674  | 0.829  |
| SRRD     | turquoise | 0.414  | 0.740  |
| SRRM5    | turquoise | -0.644 | -0.554 |
| SRRT     | turquoise | -0.562 | -0.622 |
| SRSF1    | turquoise | 0.719  | 0.681  |
| SRSF4    | turquoise | -0.823 | -0.785 |
| SRSF9    | turquoise | -0.438 | -0.497 |
| SRXN1    | turquoise | 0.714  | 0.561  |
| SSBP2    | turquoise | 0.874  | 0.974  |
| SSTR2    | turquoise | 0.394  | 0.494  |
| SSTR4    | turquoise | 0.543  | 0.805  |
| SSX2IP   | turquoise | 0.763  | 0.960  |
| ST13     | turquoise | 0.892  | 0.369  |
| ST3GAL5  | turquoise | 0.648  | 0.682  |
| ST3GAL6  | turquoise | 0.580  | 0.731  |
| ST6GAL1  | turquoise | 0.582  | 0.609  |
| ST6GAL2  | turquoise | 0.683  | 0.808  |
| ST8SIA1  | turquoise | 0.864  | 0.856  |
| ST8SIA4  | turquoise | 0.948  | 0.872  |
| STAB2    | turquoise | -0.526 | -0.685 |
| STAG3L3  | turquoise | -0.580 | -0.594 |
| STAMBPL1 | turquoise | 0.700  | 0.840  |
| STAP2    | turquoise | -0.714 | -0.582 |
| STARD10  | turquoise | -0.489 | -0.519 |
| STARD13  | turquoise | 0.485  | 0.611  |

|          |           |        |        |
|----------|-----------|--------|--------|
| STARD3NL | turquoise | 0.604  | 0.378  |
| STARD4   | turquoise | 0.873  | 0.685  |
| STARD7   | turquoise | 0.642  | 0.905  |
| STAU2    | turquoise | 0.881  | 0.844  |
| STH      | turquoise | -0.822 | -0.841 |
| STK39    | turquoise | 0.848  | 0.899  |
| STK4     | turquoise | 0.829  | 0.820  |
| STMN1    | turquoise | 0.598  | 0.709  |
| STT3B    | turquoise | 0.915  | 0.922  |
| STX10    | turquoise | -0.903 | -0.625 |
| STX12    | turquoise | 0.946  | 0.907  |
| STX18    | turquoise | -0.638 | -0.759 |
| STX3     | turquoise | 0.287  | 0.527  |
| STX6     | turquoise | 0.620  | 0.899  |
| STX7     | turquoise | 0.876  | 0.965  |
| STXBP5L  | turquoise | 0.918  | 0.944  |
| SUB1     | turquoise | 0.877  | 0.900  |
| SUGT1P   | turquoise | 0.939  | 0.537  |
| SULT1A1  | turquoise | -0.528 | -0.545 |
| SUMO4    | turquoise | -0.739 | -0.806 |
| SUPT16H  | turquoise | 0.786  | 0.845  |
| SV2C     | turquoise | 0.562  | 0.841  |
| SWI5     | turquoise | -0.897 | -0.655 |
| SYAP1    | turquoise | 0.763  | 0.129  |
| SYN3     | turquoise | 0.628  | 0.768  |
| SYNPO2   | turquoise | 0.489  | 0.851  |
| SYT11    | turquoise | 0.830  | 0.913  |
| SYT14    | turquoise | 0.941  | 0.751  |
| SYT16    | turquoise | 0.855  | 0.686  |
| SYTL1    | turquoise | -0.499 | -0.698 |
| SYTL5    | turquoise | 0.755  | 0.704  |
| TAB3     | turquoise | 0.947  | 0.986  |
| TADA1    | turquoise | 0.683  | 0.953  |
| TADA2A   | turquoise | 0.559  | 0.526  |
| TAF13    | turquoise | 0.438  | 0.478  |
| TAF2     | turquoise | 0.924  | 0.568  |
| TAF9B    | turquoise | 0.865  | 0.824  |
| TANC2    | turquoise | 0.703  | 0.962  |
| TAOK1    | turquoise | 0.930  | 0.282  |
| TAS1R3   | turquoise | -0.563 | -0.542 |
| TBC1D19  | turquoise | 0.937  | 0.941  |
| TBC1D30  | turquoise | 0.693  | 0.905  |
| TBC1D4   | turquoise | 0.774  | 0.903  |
| TBC1D5   | turquoise | 0.802  | 0.946  |
| TBC1D8B  | turquoise | 0.899  | 0.566  |
| TBCEL    | turquoise | 0.879  | 0.848  |
| TBK1     | turquoise | 0.856  | 0.755  |

|          |           |        |        |
|----------|-----------|--------|--------|
| TBKBP1   | turquoise | -0.663 | -0.719 |
| TBL1XR1  | turquoise | 0.914  | 0.961  |
| TBR1     | turquoise | 0.753  | 0.884  |
| TBRG1    | turquoise | 0.702  | 0.896  |
| TCAP     | turquoise | -0.844 | -0.899 |
| TCEAL7   | turquoise | 0.828  | 0.845  |
| TCF20    | turquoise | 0.688  | 0.926  |
| TCP1     | turquoise | 0.872  | 0.909  |
| TCP11L1  | turquoise | 0.892  | 0.958  |
| TDP1     | turquoise | 0.709  | 0.889  |
| TDRD7    | turquoise | 0.747  | 0.905  |
| TELO2    | turquoise | -0.357 | -0.461 |
| TERF2    | turquoise | 0.612  | 0.801  |
| TEX22    | turquoise | -0.511 | -0.638 |
| TFB2M    | turquoise | 0.564  | 0.913  |
| TFDP1    | turquoise | -0.148 | -0.677 |
| TGFBRAP1 | turquoise | 0.526  | 0.917  |
| TGOLN2   | turquoise | 0.930  | 0.877  |
| THAP5    | turquoise | 0.745  | 0.470  |
| THBS3    | turquoise | -0.788 | -0.801 |
| THEM5    | turquoise | 0.578  | 0.750  |
| THNSL1   | turquoise | 0.433  | 0.763  |
| THRSP    | turquoise | -0.638 | -0.664 |
| TIAM1    | turquoise | 0.827  | 0.862  |
| TIGD5    | turquoise | -0.780 | -0.549 |
| TIMM44   | turquoise | -0.804 | -0.824 |
| TIMM8A   | turquoise | 0.587  | 0.842  |
| TIMP1    | turquoise | -0.886 | -0.792 |
| TIMP4    | turquoise | -0.852 | -0.505 |
| TIPRL    | turquoise | 0.782  | 0.952  |
| TJP3     | turquoise | -0.782 | -0.689 |
| TKT      | turquoise | -0.836 | -0.546 |
| TLE3     | turquoise | -0.614 | -0.662 |
| TLK1     | turquoise | 0.824  | 0.876  |
| TM2D2    | turquoise | 0.685  | 0.926  |
| TM7SF3   | turquoise | 0.750  | 0.915  |
| TM9SF2   | turquoise | 0.982  | 0.978  |
| TM9SF3   | turquoise | 0.887  | 0.684  |
| TMC4     | turquoise | -0.454 | -0.374 |
| TMCC1    | turquoise | 0.899  | 0.767  |
| TMED2    | turquoise | 0.880  | 0.486  |
| TMED8    | turquoise | 0.926  | 0.842  |
| TMEM106B | turquoise | 0.885  | 0.880  |
| TMEM115  | turquoise | -0.370 | -0.695 |
| TMEM117  | turquoise | 0.834  | 0.907  |
| TMEM120A | turquoise | -0.823 | -0.824 |
| TMEM126B | turquoise | 0.722  | 0.553  |



|          |           |        |        |
|----------|-----------|--------|--------|
| TMEM131  | turquoise | 0.368  | 0.867  |
| TMEM132B | turquoise | 0.861  | 0.777  |
| TMEM150B | turquoise | -0.518 | -0.688 |
| TMEM167A | turquoise | 0.799  | 0.780  |
| TMEM169  | turquoise | 0.775  | 0.822  |
| TMEM170B | turquoise | 0.927  | 0.929  |
| TMEM18   | turquoise | 0.620  | 0.431  |
| TMEM181  | turquoise | 0.909  | 0.956  |
| TMEM184C | turquoise | 0.879  | 0.606  |
| TMEM19   | turquoise | 0.897  | 0.667  |
| TMEM194B | turquoise | 0.802  | 0.851  |
| TMEM199  | turquoise | 0.620  | 0.609  |
| TMEM213  | turquoise | -0.824 | -0.457 |
| TMEM216  | turquoise | -0.854 | -0.889 |
| TMEM217  | turquoise | -0.536 | -0.546 |
| TMEM219  | turquoise | -0.850 | -0.840 |
| TMEM242  | turquoise | 0.623  | 0.772  |
| TMEM30A  | turquoise | 0.889  | 0.976  |
| TMEM33   | turquoise | 0.914  | 0.963  |
| TMEM42   | turquoise | -0.873 | -0.560 |
| TMEM45B  | turquoise | -0.635 | -0.633 |
| TMEM48   | turquoise | 0.908  | 0.961  |
| TMEM66   | turquoise | 0.819  | 0.822  |
| TMEM74   | turquoise | 0.761  | 0.918  |
| TMEM86A  | turquoise | 0.646  | 0.653  |
| TMEM87B  | turquoise | 0.720  | 0.807  |
| TMEM91   | turquoise | -0.717 | -0.815 |
| TMEM99   | turquoise | 0.665  | 0.270  |
| TMOD2    | turquoise | 0.969  | 0.954  |
| TMPO     | turquoise | 0.916  | 0.670  |
| TMPPE    | turquoise | 0.773  | 0.459  |
| TMSB15B  | turquoise | 0.714  | 0.803  |
| TMTC1    | turquoise | 0.968  | 0.522  |
| TMUB1    | turquoise | -0.867 | -0.738 |
| TMX3     | turquoise | 0.945  | 0.931  |
| TMX4     | turquoise | 0.794  | 0.919  |
| TNKS     | turquoise | 0.876  | 0.862  |
| TNKS1BP1 | turquoise | -0.743 | -0.581 |
| TNNC2    | turquoise | -0.746 | -0.373 |
| TNNT1    | turquoise | -0.698 | -0.753 |
| TNR      | turquoise | 0.583  | 0.866  |
| TOE1     | turquoise | -0.432 | -0.515 |
| TOMM20   | turquoise | 0.800  | 0.929  |
| TOMM70A  | turquoise | 0.909  | 0.966  |
| TOP2B    | turquoise | 0.919  | 0.850  |
| TOPBP1   | turquoise | 0.891  | 0.926  |
| TOR3A    | turquoise | -0.483 | -0.626 |

|          |           |        |        |
|----------|-----------|--------|--------|
| TOX4     | turquoise | 0.470  | 0.809  |
| TP53BP1  | turquoise | 0.586  | 0.915  |
| TP53I13  | turquoise | -0.797 | -0.794 |
| TPH2     | turquoise | 0.750  | 0.677  |
| TPM2     | turquoise | -0.776 | -0.574 |
| TPP2     | turquoise | 0.918  | 0.809  |
| TPRA1    | turquoise | -0.936 | -0.797 |
| TRABD    | turquoise | -0.870 | -0.657 |
| TRAK2    | turquoise | 0.799  | 0.404  |
| TRAPPC11 | turquoise | 0.884  | 0.926  |
| TRAPPC4  | turquoise | -0.728 | -0.298 |
| TRAPPC6A | turquoise | -0.722 | -0.316 |
| TRAPPC6B | turquoise | 0.838  | 0.953  |
| TRAPPC8  | turquoise | 0.959  | 0.874  |
| TRHDE    | turquoise | 0.937  | 0.905  |
| TRIM23   | turquoise | 0.854  | 0.975  |
| TRIM26P1 | turquoise | -0.650 | -0.535 |
| TRIM52   | turquoise | -0.444 | -0.397 |
| TRIM67   | turquoise | 0.396  | 0.633  |
| TRIP12   | turquoise | 0.913  | 0.768  |
| TRMT12   | turquoise | 0.774  | 0.781  |
| TRMT61B  | turquoise | 0.583  | 0.815  |
| TRNT1    | turquoise | 0.846  | 0.674  |
| TRPC1    | turquoise | 0.981  | 0.929  |
| TRPT1    | turquoise | -0.808 | -0.578 |
| TRUB1    | turquoise | 0.881  | 0.928  |
| TSC1     | turquoise | 0.380  | 0.802  |
| TSC22D2  | turquoise | 0.843  | 0.519  |
| TSEN34   | turquoise | -0.749 | -0.874 |
| TSHR     | turquoise | -0.750 | -0.716 |
| TSHZ3    | turquoise | 0.216  | 0.708  |
| TSN      | turquoise | 0.830  | 0.910  |
| TSNAX    | turquoise | 0.867  | 0.948  |
| TSNAXIP1 | turquoise | -0.680 | -0.630 |
| TSPAN1   | turquoise | -0.663 | -0.341 |
| TSPAN16  | turquoise | -0.620 | -0.832 |
| TSPAN19  | turquoise | 0.610  | 0.451  |
| TSPAN2   | turquoise | 0.776  | 0.855  |
| TSPAN5   | turquoise | 0.729  | 0.878  |
| TSPAN7   | turquoise | -0.529 | -0.420 |
| TSPYL5   | turquoise | 0.580  | 0.952  |
| TTBK2    | turquoise | 0.958  | 0.851  |
| TTC21B   | turquoise | 0.955  | 0.853  |
| TTC27    | turquoise | 0.750  | 0.671  |
| TTC33    | turquoise | 0.964  | 0.956  |
| TTC37    | turquoise | 0.868  | 0.918  |
| TTL      | turquoise | 0.759  | 0.896  |

|           |           |        |        |
|-----------|-----------|--------|--------|
| TTLL13    | turquoise | -0.652 | -0.548 |
| TTPAL     | turquoise | 0.966  | 0.690  |
| TUT1      | turquoise | -0.940 | -0.879 |
| TXN2      | turquoise | -0.903 | -0.755 |
| TXNDC15   | turquoise | 0.830  | 0.662  |
| TXNDC16   | turquoise | 0.904  | 0.946  |
| TXNDC9    | turquoise | 0.765  | 0.663  |
| TXNL1     | turquoise | 0.784  | 0.882  |
| TXNRD2    | turquoise | -0.863 | -0.608 |
| U2AF1     | turquoise | -0.849 | -0.780 |
| U47924.19 | turquoise | -0.395 | -0.753 |
| U47924.25 | turquoise | -0.812 | -0.450 |
| UAP1      | turquoise | 0.366  | 0.404  |
| UBA3      | turquoise | 0.863  | 0.810  |
| UBA5      | turquoise | 0.779  | 0.923  |
| UBA6      | turquoise | 0.907  | 0.675  |
| UBAC2     | turquoise | -0.537 | -0.783 |
| UBE2A     | turquoise | 0.888  | 0.829  |
| UBE2D1    | turquoise | 0.619  | 0.758  |
| UBE2D2    | turquoise | 0.721  | 0.778  |
| UBE2D3    | turquoise | 0.934  | 0.732  |
| UBE2G1    | turquoise | 0.845  | 0.845  |
| UBE2K     | turquoise | 0.846  | 0.972  |
| UBE2L6    | turquoise | -0.794 | -0.828 |
| UBE2N     | turquoise | 0.917  | 0.951  |
| UBE2W     | turquoise | 0.436  | 0.730  |
| UBE3C     | turquoise | 0.640  | 0.878  |
| UBE4A     | turquoise | 0.759  | 0.846  |
| UBE4B     | turquoise | 0.627  | 0.929  |
| UBFD1     | turquoise | 0.556  | 0.936  |
| UBL3      | turquoise | 0.891  | 0.906  |
| UBLCP1    | turquoise | 0.785  | 0.695  |
| UBP1      | turquoise | 0.696  | 0.896  |
| UBQLN1    | turquoise | 0.925  | 0.989  |
| UBQLN2    | turquoise | 0.589  | 0.928  |
| UBR1      | turquoise | 0.963  | 0.663  |
| UBR3      | turquoise | 0.960  | 0.987  |
| UBR7      | turquoise | 0.734  | 0.765  |
| UBTD1     | turquoise | -0.893 | -0.904 |
| UBTD2     | turquoise | 0.930  | 0.547  |
| UBXN1     | turquoise | -0.851 | -0.751 |
| UBXN2B    | turquoise | 0.855  | 0.964  |
| UCHL5     | turquoise | 0.847  | 0.886  |
| UCK1      | turquoise | -0.824 | -0.774 |
| UCN       | turquoise | -0.552 | -0.740 |
| UCP3      | turquoise | -0.786 | -0.853 |
| UFM1      | turquoise | 0.934  | 0.740  |

|           |           |        |        |
|-----------|-----------|--------|--------|
| UGCG      | turquoise | 0.724  | 0.922  |
| UGP2      | turquoise | 0.732  | 0.853  |
| UHMK1     | turquoise | 0.940  | 0.961  |
| UHRF1BP1L | turquoise | 0.983  | 0.949  |
| ULK2      | turquoise | 0.645  | 0.960  |
| UNC45A    | turquoise | -0.779 | -0.451 |
| UNC5D     | turquoise | 0.767  | 0.887  |
| UNC80     | turquoise | 0.691  | 0.925  |
| UPB1      | turquoise | -0.677 | -0.641 |
| UPK2      | turquoise | -0.479 | -0.687 |
| UPK3B     | turquoise | -0.523 | -0.706 |
| USF2      | turquoise | -0.760 | -0.718 |
| USO1      | turquoise | 0.911  | 0.837  |
| USP10     | turquoise | 0.730  | 0.548  |
| USP12     | turquoise | 0.893  | 0.807  |
| USP13     | turquoise | 0.651  | 0.700  |
| USP14     | turquoise | 0.908  | 0.945  |
| USP15     | turquoise | 0.973  | 0.749  |
| USP25     | turquoise | 0.939  | 0.906  |
| USP31     | turquoise | 0.806  | 0.944  |
| USP32     | turquoise | 0.882  | 0.971  |
| USP33     | turquoise | 0.923  | 0.970  |
| USP36     | turquoise | -0.572 | -0.897 |
| USP39     | turquoise | -0.786 | -0.672 |
| USP46     | turquoise | 0.812  | 0.718  |
| USP7      | turquoise | 0.904  | 0.953  |
| USP9X     | turquoise | 0.857  | 0.832  |
| USPL1     | turquoise | 0.805  | 0.798  |
| UTP6      | turquoise | -0.283 | -0.523 |
| VAMP4     | turquoise | 0.934  | 0.875  |
| VAMP5     | turquoise | -0.813 | -0.889 |
| VAPA      | turquoise | 0.763  | 0.926  |
| VAPB      | turquoise | 0.921  | 0.962  |
| VASP      | turquoise | -0.578 | -0.675 |
| VAT1L     | turquoise | 0.674  | 0.954  |
| VBP1      | turquoise | 0.875  | 0.751  |
| VCPIP1    | turquoise | 0.863  | 0.933  |
| VEGFB     | turquoise | -0.811 | -0.888 |
| VEZT      | turquoise | 0.911  | 0.714  |
| VIP       | turquoise | 0.832  | 0.813  |
| VKORC1L1  | turquoise | 0.972  | 0.938  |
| VMP1      | turquoise | 0.816  | 0.860  |
| VPS13A    | turquoise | 0.773  | 0.638  |
| VPS13B    | turquoise | 0.836  | 0.826  |
| VPS13D    | turquoise | 0.778  | 0.833  |
| VPS26A    | turquoise | 0.914  | 0.632  |
| VPS37A    | turquoise | 0.889  | 0.722  |

|          |           |        |        |
|----------|-----------|--------|--------|
| VPS37B   | turquoise | -0.547 | -0.748 |
| VPS41    | turquoise | 0.847  | 0.802  |
| VPS8     | turquoise | 0.771  | 0.811  |
| VTA1     | turquoise | 0.897  | 0.963  |
| VTI1A    | turquoise | 0.967  | 0.900  |
| VTN      | turquoise | -0.880 | -0.725 |
| VWC2L    | turquoise | 0.806  | 0.923  |
| VWCE     | turquoise | -0.683 | -0.825 |
| WAC      | turquoise | 0.806  | 0.831  |
| WASH2P   | turquoise | -0.827 | -0.329 |
| WASH4P   | turquoise | -0.499 | -0.545 |
| WASL     | turquoise | 0.915  | 0.893  |
| WBSCR16  | turquoise | -0.404 | -0.836 |
| WDFY1    | turquoise | 0.882  | 0.658  |
| WDR12    | turquoise | 0.919  | 0.954  |
| WDR17    | turquoise | 0.898  | 0.973  |
| WDR26    | turquoise | 0.969  | 0.882  |
| WDR36    | turquoise | 0.955  | 0.823  |
| WDR37    | turquoise | 0.572  | 0.835  |
| WDR41    | turquoise | 0.891  | 0.878  |
| WDR44    | turquoise | 0.820  | 0.960  |
| WDR48    | turquoise | 0.863  | 0.525  |
| WDR60    | turquoise | -0.667 | -0.869 |
| WDR66    | turquoise | -0.690 | -0.500 |
| WDR70    | turquoise | -0.839 | -0.841 |
| WFDC3    | turquoise | -0.750 | -0.426 |
| WFS1     | turquoise | -0.507 | -0.621 |
| WIPI1    | turquoise | -0.736 | -0.660 |
| WNT5A    | turquoise | 0.752  | 0.820  |
| WNT8A    | turquoise | -0.636 | -0.575 |
| WWC1     | turquoise | -0.664 | -0.475 |
| WWP1     | turquoise | 0.887  | 0.909  |
| XKR6     | turquoise | -0.688 | -0.876 |
| XPR1     | turquoise | 0.922  | 0.958  |
| XRCC5    | turquoise | 0.811  | 0.728  |
| YEATS2   | turquoise | 0.634  | 0.945  |
| YIPF5    | turquoise | 0.954  | 0.760  |
| YME1L1   | turquoise | 0.904  | 0.639  |
| YOD1     | turquoise | 0.830  | 0.723  |
| YPEL2    | turquoise | 0.786  | 0.929  |
| YPEL5    | turquoise | 0.629  | 0.845  |
| YTHDC2   | turquoise | 0.819  | 0.737  |
| YTHDF3   | turquoise | 0.874  | 0.897  |
| YWHAZ    | turquoise | 0.752  | 0.887  |
| Z97634.5 | turquoise | -0.572 | -0.833 |
| ZADH2    | turquoise | 0.773  | 0.856  |
| ZBTB11   | turquoise | 0.965  | 0.894  |

|          |           |        |        |
|----------|-----------|--------|--------|
| ZBTB24   | turquoise | 0.887  | 0.944  |
| ZBTB38   | turquoise | 0.877  | 0.716  |
| ZBTB41   | turquoise | 0.962  | 0.650  |
| ZBTB44   | turquoise | 0.924  | 0.737  |
| ZBTB48   | turquoise | -0.914 | -0.668 |
| ZBTB9    | turquoise | 0.058  | 0.462  |
| ZC3H12B  | turquoise | 0.825  | 0.981  |
| ZC3H13   | turquoise | -0.506 | -0.782 |
| ZC3HAV1L | turquoise | 0.364  | 0.744  |
| ZDBF2    | turquoise | 0.918  | 0.894  |
| ZDHHC15  | turquoise | 0.851  | 0.890  |
| ZDHHC17  | turquoise | 0.848  | 0.924  |
| ZDHHC18  | turquoise | -0.879 | -0.632 |
| ZDHHC19  | turquoise | -0.937 | -0.794 |
| ZDHHC20  | turquoise | 0.781  | 0.808  |
| ZDHHC21  | turquoise | 0.920  | 0.830  |
| ZDHHC24  | turquoise | -0.745 | -0.421 |
| ZDHHC4   | turquoise | 0.580  | 0.496  |
| ZDHHC6   | turquoise | 0.501  | 0.768  |
| ZFAND1   | turquoise | 0.966  | 0.845  |
| ZFHX2    | turquoise | -0.685 | -0.591 |
| ZFP161   | turquoise | 0.732  | 0.778  |
| ZFP62    | turquoise | 0.430  | 0.553  |
| ZFP90    | turquoise | 0.531  | 0.455  |
| ZFP91    | turquoise | 0.827  | 0.786  |
| ZFPM1    | turquoise | -0.658 | -0.561 |
| ZFYVE20  | turquoise | 0.762  | 0.914  |
| ZFYVE21  | turquoise | -0.766 | -0.480 |
| ZMAT3    | turquoise | 0.874  | 0.823  |
| ZMAT5    | turquoise | -0.809 | -0.858 |
| ZMYM2    | turquoise | 0.939  | 0.915  |
| ZMYM4    | turquoise | 0.951  | 0.980  |
| ZMYND8   | turquoise | -0.657 | -0.695 |
| ZNF12    | turquoise | 0.748  | 0.588  |
| ZNF133   | turquoise | -0.920 | -0.719 |
| ZNF134   | turquoise | 0.610  | 0.886  |
| ZNF138   | turquoise | 0.948  | 0.938  |
| ZNF157   | turquoise | 0.449  | 0.697  |
| ZNF180   | turquoise | 0.786  | 0.547  |
| ZNF184   | turquoise | 0.453  | 0.729  |
| ZNF23    | turquoise | 0.384  | 0.708  |
| ZNF248   | turquoise | 0.755  | 0.916  |
| ZNF25    | turquoise | 0.911  | 0.953  |
| ZNF252   | turquoise | 0.621  | 0.794  |
| ZNF287   | turquoise | 0.770  | 0.832  |
| ZNF30    | turquoise | -0.714 | -0.189 |
| ZNF322   | turquoise | 0.857  | 0.724  |

|         |           |        |        |
|---------|-----------|--------|--------|
| ZNF323  | turquoise | 0.767  | 0.562  |
| ZNF33B  | turquoise | 0.922  | 0.691  |
| ZNF34   | turquoise | -0.509 | -0.703 |
| ZNF346  | turquoise | -0.826 | -0.489 |
| ZNF365  | turquoise | 0.834  | 0.847  |
| ZNF37BP | turquoise | 0.885  | 0.739  |
| ZNF382  | turquoise | 0.505  | 0.787  |
| ZNF385B | turquoise | 0.575  | 0.901  |
| ZNF391  | turquoise | 0.352  | 0.498  |
| ZNF396  | turquoise | 0.620  | 0.402  |
| ZNF41   | turquoise | 0.903  | 0.904  |
| ZNF423  | turquoise | -0.827 | -0.713 |
| ZNF461  | turquoise | 0.452  | 0.750  |
| ZNF468  | turquoise | 0.496  | 0.341  |
| ZNF470  | turquoise | 0.720  | 0.536  |
| ZNF484  | turquoise | 0.842  | 0.842  |
| ZNF485  | turquoise | 0.754  | 0.557  |
| ZNF503  | turquoise | -0.445 | -0.634 |
| ZNF510  | turquoise | 0.855  | 0.971  |
| ZNF514  | turquoise | -0.556 | -0.593 |
| ZNF525  | turquoise | 0.805  | 0.627  |
| ZNF526  | turquoise | -0.778 | -0.478 |
| ZNF542  | turquoise | 0.867  | 0.846  |
| ZNF552  | turquoise | -0.779 | -0.932 |
| ZNF556  | turquoise | -0.621 | -0.516 |
| ZNF563  | turquoise | -0.346 | -0.788 |
| ZNF570  | turquoise | 0.814  | 0.837  |
| ZNF579  | turquoise | -0.604 | -0.697 |
| ZNF580  | turquoise | -0.638 | -0.726 |
| ZNF581  | turquoise | -0.826 | -0.569 |
| ZNF586  | turquoise | -0.807 | -0.740 |
| ZNF610  | turquoise | 0.562  | 0.438  |
| ZNF626  | turquoise | 0.806  | 0.403  |
| ZNF639  | turquoise | 0.689  | 0.554  |
| ZNF643  | turquoise | 0.550  | 0.921  |
| ZNF655  | turquoise | 0.906  | 0.691  |
| ZNF658  | turquoise | 0.663  | 0.738  |
| ZNF664  | turquoise | 0.775  | 0.503  |
| ZNF672  | turquoise | -0.719 | -0.674 |
| ZNF675  | turquoise | 0.897  | 0.941  |
| ZNF681  | turquoise | 0.670  | 0.646  |
| ZNF688  | turquoise | -0.582 | -0.601 |
| ZNF704  | turquoise | 0.882  | 0.743  |
| ZNF711  | turquoise | 0.799  | 0.953  |
| ZNF718  | turquoise | 0.456  | 0.530  |
| ZNF720  | turquoise | 0.622  | 0.436  |
| ZNF721  | turquoise | 0.666  | 0.686  |

|             |           |        |        |
|-------------|-----------|--------|--------|
| ZNF737      | turquoise | 0.768  | 0.752  |
| ZNF75D      | turquoise | 0.685  | 0.833  |
| ZNF768      | turquoise | -0.885 | -0.797 |
| ZNF770      | turquoise | 0.893  | 0.923  |
| ZNF773      | turquoise | -0.209 | -0.915 |
| ZNF776      | turquoise | 0.750  | 0.941  |
| ZNF778      | turquoise | 0.597  | 0.786  |
| ZNF780A     | turquoise | 0.824  | 0.907  |
| ZNF780B     | turquoise | 0.602  | 0.842  |
| ZNF784      | turquoise | -0.845 | -0.597 |
| ZNF804B     | turquoise | 0.712  | 0.749  |
| ZNF814      | turquoise | -0.459 | -0.933 |
| ZNRD1       | turquoise | -0.840 | -0.870 |
| ZRANB1      | turquoise | 0.840  | 0.942  |
| ZSCAN22     | turquoise | -0.909 | -0.823 |
| ZUFSP       | turquoise | 0.461  | 0.500  |
| ZW10        | turquoise | 0.784  | 0.874  |
| ZWILCH      | turquoise | 0.569  | 0.914  |
| ZXDA        | turquoise | 0.829  | 0.553  |
| ZXDB        | turquoise | 0.901  | 0.924  |
| ZYG11B      | turquoise | 0.917  | 0.862  |
| ZZZ3        | turquoise | 0.881  | 0.815  |
| AC005726.6  | white     | 0.712  | 0.844  |
| AC025335.1  | white     | 0.878  | 0.789  |
| AC034220.3  | white     | 0.895  | 0.714  |
| AC091172.1  | white     | 0.831  | 0.809  |
| ACRC        | white     | 0.872  | 0.840  |
| ADAM20      | white     | 0.670  | 0.730  |
| AGAP1       | white     | -0.879 | -0.782 |
| ALKBH5      | white     | -0.748 | -0.659 |
| AP000867.1  | white     | 0.796  | 0.851  |
| BNIPL       | white     | 0.695  | 0.764  |
| BTBD18      | white     | 0.743  | 0.522  |
| C12orf76    | white     | -0.848 | -0.885 |
| C19orf45    | white     | -0.556 | -0.422 |
| C6orf163    | white     | 0.871  | 0.831  |
| C8orf56     | white     | 0.739  | 0.855  |
| CACNA1C-AS2 | white     | 0.764  | 0.833  |
| CELF1       | white     | 0.660  | 0.480  |
| CLCF1       | white     | 0.845  | 0.901  |
| CMYA5       | white     | 0.621  | 0.686  |
| COBL        | white     | -0.937 | -0.827 |
| CPA4        | white     | -0.753 | -0.701 |
| CUZD1       | white     | 0.448  | 0.680  |
| CXCL14      | white     | 0.629  | 0.632  |
| CYP26A1     | white     | -0.831 | -0.879 |
| CYP27C1     | white     | 0.616  | 0.589  |



|           |       |        |        |
|-----------|-------|--------|--------|
| CYP3A5    | white | 0.866  | 0.851  |
| DPP3      | white | -0.785 | -0.579 |
| DPYSL5    | white | -0.859 | -0.899 |
| DUSP27    | white | -0.768 | -0.845 |
| EGOT      | white | 0.585  | 0.539  |
| FAM104A   | white | 0.604  | 0.290  |
| FAM218A   | white | -0.759 | -0.581 |
| FER1L4    | white | 0.639  | 0.717  |
| FIBCD1    | white | -0.828 | -0.976 |
| FIGF      | white | 0.695  | 0.797  |
| FILIP1    | white | -0.636 | -0.716 |
| FOXJ2     | white | -0.771 | -0.890 |
| GORASP2   | white | -0.836 | -0.843 |
| GPD1      | white | -0.845 | -0.887 |
| GPR18     | white | 0.858  | 0.857  |
| GRIK3     | white | -0.929 | -0.945 |
| GSDMB     | white | 0.895  | 0.825  |
| HES7      | white | 0.765  | 0.917  |
| HIST1H2BN | white | -0.713 | -0.713 |
| HS3ST4    | white | -0.774 | -0.913 |
| HSD3B1    | white | 0.917  | 0.764  |
| IGFL4     | white | 0.695  | 0.726  |
| INTS10    | white | 0.803  | 0.875  |
| ISOC1     | white | -0.929 | -0.856 |
| JAKMIP3   | white | -0.778 | -0.858 |
| KCNK2     | white | -0.869 | -0.974 |
| KIF2C     | white | 0.549  | 0.840  |
| LARP6     | white | -0.648 | -0.894 |
| LINC00158 | white | 0.856  | 0.926  |
| LINC00202 | white | 0.681  | 0.829  |
| MBP       | white | -0.760 | -0.499 |
| MMACHC    | white | -0.864 | -0.844 |
| MOK       | white | 0.915  | 0.767  |
| MSS51     | white | 0.890  | 0.714  |
| MSX1      | white | 0.510  | 0.804  |
| MTL5      | white | -0.732 | -0.550 |
| MYADM     | white | -0.831 | -0.956 |
| NAGS      | white | 0.818  | 0.826  |
| NIPAL3    | white | -0.939 | -0.893 |
| NKAIN1    | white | -0.690 | -0.641 |
| NKAIN2    | white | -0.904 | -0.964 |
| NME1-NME2 | white | 0.805  | 0.714  |
| NOS1      | white | -0.661 | -0.685 |
| NR4A2     | white | -0.649 | -0.665 |
| OIP5      | white | 0.845  | 0.745  |
| OLFML2B   | white | -0.830 | -0.932 |
| PCDH17    | white | -0.822 | -0.770 |

|               |       |        |        |
|---------------|-------|--------|--------|
| PCID2         | white | 0.653  | 0.635  |
| PLA2R1        | white | 0.720  | 0.624  |
| PNPLA1        | white | -0.830 | -0.617 |
| PRLR          | white | -0.878 | -0.493 |
| PROZ          | white | 0.710  | 0.634  |
| PRUNE         | white | -0.854 | -0.882 |
| PVRL1         | white | -0.692 | -0.931 |
| PXMP4         | white | -0.797 | -0.914 |
| RAB3B         | white | -0.701 | -0.883 |
| RADIL         | white | 0.788  | 0.538  |
| RNFT1         | white | 0.697  | 0.870  |
| RP11-133O22.6 | white | 0.846  | 0.895  |
| RP11-190J1.10 | white | 0.819  | 0.797  |
| RP11-264F23.3 | white | 0.836  | 0.827  |
| RP11-304N14.2 | white | 0.718  | 0.488  |
| RP11-327I22.6 | white | 0.578  | 0.774  |
| RP11-345J4.8  | white | 0.584  | 0.638  |
| RP11-373L8.2  | white | 0.698  | 0.758  |
| RP11-867G2.8  | white | -0.803 | -0.885 |
| RP4-655J12.3  | white | 0.797  | 0.768  |
| SCARA5        | white | -0.755 | -0.722 |
| SDK2          | white | -0.868 | -0.945 |
| SERPIND1      | white | 0.888  | 0.784  |
| SH3GL3        | white | -0.758 | -0.925 |
| SIRT4         | white | 0.867  | 0.490  |
| SLC16A11      | white | 0.697  | 0.265  |
| SLC17A8       | white | -0.741 | -0.857 |
| SLC22A4       | white | 0.830  | 0.648  |
| SLC38A11      | white | 0.825  | 0.954  |
| SLC47A2       | white | 0.687  | 0.633  |
| SPAG4         | white | 0.755  | 0.666  |
| SPAG5-AS1     | white | 0.779  | 0.936  |
| SYT6          | white | -0.894 | -0.894 |
| TCTEX1D2      | white | 0.783  | 0.817  |
| TERT          | white | 0.700  | 0.689  |
| TIMP2         | white | -0.926 | -0.884 |
| TMEM44        | white | 0.882  | 0.725  |
| TMPRSS11F     | white | 0.785  | 0.776  |
| TNFRSF25      | white | 0.765  | 0.740  |
| TNFSF13B      | white | 0.805  | 0.699  |
| TPPP          | white | -0.685 | -0.830 |
| TRIM7         | white | 0.810  | 0.806  |
| UPK1B         | white | 0.953  | 0.845  |
| UPP1          | white | 0.783  | 0.593  |
| WBP11         | white | -0.758 | -0.849 |
| WDR63         | white | 0.833  | 0.765  |
| ZFP64         | white | -0.762 | -0.888 |

|             |        |        |        |
|-------------|--------|--------|--------|
| ZNF521      | white  | -0.567 | -0.825 |
| ZNF689      | white  | -0.928 | -0.489 |
| ZNF714      | white  | 0.802  | 0.636  |
| MARCH10     | yellow | -0.667 | -0.770 |
| A2LD1       | yellow | 0.794  | 0.398  |
| A2ML1       | yellow | 0.857  | 0.730  |
| AAGAB       | yellow | -0.841 | -0.862 |
| ABCC11      | yellow | 0.895  | 0.907  |
| ABHD1       | yellow | 0.578  | 0.653  |
| ABHD15      | yellow | 0.864  | 0.601  |
| ABHD4       | yellow | 0.924  | 0.933  |
| ABHD5       | yellow | 0.899  | 0.729  |
| AC000120.7  | yellow | 0.718  | 0.609  |
| AC004148.1  | yellow | 0.624  | 0.879  |
| AC006111.1  | yellow | 0.771  | 0.797  |
| AC007464.1  | yellow | 0.626  | 0.850  |
| AC007566.10 | yellow | 0.647  | 0.870  |
| AC007750.5  | yellow | -0.657 | -0.873 |
| AC008888.7  | yellow | 0.523  | 0.811  |
| AC009133.14 | yellow | 0.417  | 0.453  |
| AC012307.3  | yellow | -0.658 | -0.780 |
| AC012652.1  | yellow | -0.756 | -0.837 |
| AC020907.1  | yellow | 0.895  | 0.308  |
| AC068831.6  | yellow | 0.600  | 0.672  |
| AC084018.1  | yellow | 0.795  | 0.889  |
| AC093484.6  | yellow | -0.505 | -0.783 |
| AC093734.11 | yellow | -0.404 | -0.830 |
| AC097359.1  | yellow | 0.675  | 0.636  |
| AC097468.7  | yellow | -0.517 | -0.663 |
| AC135178.1  | yellow | 0.778  | 0.736  |
| ACAA2       | yellow | 0.926  | 0.900  |
| ACACB       | yellow | 0.982  | 0.909  |
| ACADS       | yellow | 0.856  | 0.894  |
| ACBD7       | yellow | 0.867  | 0.770  |
| ACO1        | yellow | 0.904  | 0.936  |
| ACOT11      | yellow | 0.808  | 0.895  |
| ACOX1       | yellow | 0.793  | 0.878  |
| ACOX2       | yellow | 0.908  | 0.872  |
| ACP6        | yellow | 0.770  | 0.703  |
| ACSF2       | yellow | 0.883  | 0.489  |
| ACSS3       | yellow | 0.874  | 0.848  |
| ADAM12      | yellow | 0.868  | 0.832  |
| ADCY8       | yellow | 0.793  | 0.938  |
| ADCYAP1R1   | yellow | 0.741  | 0.870  |
| ADD3        | yellow | 0.886  | 0.885  |
| ADHFE1      | yellow | 0.941  | 0.901  |
| AGBL2       | yellow | 0.746  | 0.515  |

|             |        |        |        |
|-------------|--------|--------|--------|
| AGER        | yellow | 0.919  | 0.845  |
| AGTRAP      | yellow | 0.883  | 0.873  |
| AHCYL1      | yellow | 0.972  | 0.936  |
| AHNAK2      | yellow | -0.867 | -0.769 |
| AKIRIN2     | yellow | -0.619 | -0.666 |
| AKR1C1      | yellow | -0.616 | -0.909 |
| AKR1C3      | yellow | 0.828  | 0.964  |
| AKR7A3      | yellow | 0.766  | 0.648  |
| ALDH1L1-AS2 | yellow | 0.707  | 0.666  |
| ALDH4A1     | yellow | 0.911  | 0.833  |
| ALDH6A1     | yellow | 0.867  | 0.869  |
| ALDH7A1     | yellow | 0.939  | 0.929  |
| ALDH9A1     | yellow | 0.891  | 0.846  |
| AMOT        | yellow | 0.891  | 0.861  |
| ANAPC13     | yellow | -0.950 | -0.672 |
| ANKFN1      | yellow | 0.714  | 0.676  |
| ANKRD17     | yellow | -0.508 | -0.723 |
| ANTXR1      | yellow | 0.891  | 0.945  |
| AP000282.2  | yellow | 0.682  | 0.555  |
| APCDD1L     | yellow | 0.425  | 0.669  |
| APH1A       | yellow | 0.795  | 0.786  |
| APITD1      | yellow | -0.685 | -0.916 |
| APOBEC2     | yellow | 0.632  | 0.836  |
| AR          | yellow | 0.369  | 0.614  |
| ARHGEF26    | yellow | 0.902  | 0.965  |
| ARHGEF40    | yellow | 0.917  | 0.804  |
| ARL17A      | yellow | 0.821  | 0.849  |
| ARL6IP5     | yellow | -0.742 | -0.894 |
| ARSF        | yellow | 0.910  | 0.796  |
| ARSI        | yellow | 0.692  | 0.726  |
| ARX         | yellow | 0.599  | 0.462  |
| ASAP3       | yellow | 0.970  | 0.912  |
| ATAT1       | yellow | 0.613  | 0.389  |
| ATG16L1     | yellow | -0.675 | -0.729 |
| ATP1A2      | yellow | 0.945  | 0.954  |
| ATP1B3      | yellow | -0.809 | -0.706 |
| ATP6V0E1    | yellow | 0.880  | 0.931  |
| ATP6V0E2    | yellow | -0.731 | -0.757 |
| ATP6V1D     | yellow | -0.728 | -0.911 |
| ATP6V1E1    | yellow | -0.934 | -0.913 |
| ATP6V1G2    | yellow | -0.754 | -0.969 |
| ATXN10      | yellow | -0.867 | -0.874 |
| BBS2        | yellow | 0.898  | 0.931  |
| BCAN        | yellow | 0.869  | 0.668  |
| BCAR3       | yellow | 0.937  | 0.774  |
| BCAS2       | yellow | -0.802 | -0.835 |
| BCKDHB      | yellow | 0.720  | 0.765  |

|           |        |        |        |
|-----------|--------|--------|--------|
| BCL2L12   | yellow | 0.888  | 0.834  |
| BCL6      | yellow | 0.918  | 0.812  |
| BEND6     | yellow | -0.775 | -0.880 |
| BHLHA9    | yellow | -0.592 | -0.547 |
| BOLA3-AS1 | yellow | -0.659 | -0.721 |
| BTBD10    | yellow | -0.794 | -0.907 |
| BUD13     | yellow | 0.457  | 0.653  |
| C10orf26  | yellow | 0.892  | 0.837  |
| C11orf67  | yellow | 0.643  | 0.932  |
| C11orf74  | yellow | -0.603 | -0.706 |
| C11orf93  | yellow | 0.828  | 0.780  |
| C15orf56  | yellow | 0.587  | 0.362  |
| C16orf74  | yellow | 0.381  | 0.284  |
| C19orf63  | yellow | 0.768  | 0.454  |
| C1orf126  | yellow | 0.543  | 0.534  |
| C1orf56   | yellow | 0.937  | 0.833  |
| C1orf61   | yellow | 0.851  | 0.854  |
| C1S       | yellow | 0.776  | 0.815  |
| C20orf118 | yellow | 0.789  | 0.858  |
| C2orf18   | yellow | 0.853  | 0.362  |
| C2orf72   | yellow | 0.900  | 0.877  |
| C3orf70   | yellow | 0.801  | 0.790  |
| C5orf56   | yellow | 0.654  | 0.881  |
| C6orf25   | yellow | 0.408  | 0.858  |
| C6orf70   | yellow | 0.370  | 0.432  |
| C8orf12   | yellow | 0.661  | 0.834  |
| C9orf123  | yellow | -0.523 | -0.834 |
| C9orf43   | yellow | 0.735  | 0.891  |
| C9orf91   | yellow | -0.744 | -0.899 |
| C9orf95   | yellow | -0.759 | -0.665 |
| CABLES1   | yellow | 0.791  | 0.863  |
| CADM1     | yellow | 0.684  | 0.851  |
| CAMKMT    | yellow | 0.728  | 0.782  |
| CAMLG     | yellow | -0.644 | -0.668 |
| CAPN2     | yellow | 0.887  | 0.935  |
| CASKIN2   | yellow | 0.779  | 0.588  |
| CASP6     | yellow | 0.755  | 0.722  |
| CASP8     | yellow | 0.654  | 0.702  |
| CAT       | yellow | 0.832  | 0.821  |
| CCBP2     | yellow | 0.895  | 0.690  |
| CCDC25    | yellow | -0.792 | -0.654 |
| CCDC8     | yellow | 0.887  | 0.778  |
| CCDC80    | yellow | 0.941  | 0.562  |
| CCNDBP1   | yellow | -0.802 | -0.918 |
| CCNJL     | yellow | 0.605  | 0.846  |
| CCT4      | yellow | -0.711 | -0.801 |
| CCZ1      | yellow | 0.615  | 0.469  |

|               |        |        |        |
|---------------|--------|--------|--------|
| CD72          | yellow | 0.760  | 0.843  |
| CD81          | yellow | 0.744  | 0.921  |
| CD82          | yellow | 0.819  | 0.578  |
| CD83          | yellow | -0.806 | -0.821 |
| CD99L2        | yellow | -0.820 | -0.891 |
| CDC16         | yellow | 0.695  | 0.583  |
| CDC42EP4      | yellow | 0.956  | 0.924  |
| CDCA5         | yellow | -0.682 | -0.863 |
| CDH20         | yellow | 0.850  | 0.558  |
| CDK13         | yellow | 0.470  | 0.583  |
| CDKN2AIPNL    | yellow | -0.604 | -0.866 |
| CDKN2C        | yellow | 0.908  | 0.820  |
| CDRT4         | yellow | 0.313  | 0.644  |
| CHDH          | yellow | 0.944  | 0.716  |
| CHGB          | yellow | -0.561 | -0.832 |
| CHKA          | yellow | 0.702  | 0.531  |
| CHN1          | yellow | -0.855 | -0.885 |
| CISD1         | yellow | -0.910 | -0.874 |
| CISD2         | yellow | -0.778 | -0.726 |
| CKMT2         | yellow | 0.553  | 0.632  |
| CLEC3B        | yellow | -0.559 | -0.272 |
| CLSPN         | yellow | -0.462 | -0.450 |
| CLTCL1        | yellow | 0.439  | 0.359  |
| CLU           | yellow | 0.652  | 0.878  |
| CMTM3         | yellow | 0.607  | 0.790  |
| CNIH3         | yellow | -0.850 | -0.839 |
| CNKSR2        | yellow | -0.539 | -0.911 |
| CNTRF         | yellow | 0.912  | 0.820  |
| CNTN6         | yellow | -0.794 | -0.796 |
| COPS3         | yellow | -0.726 | -0.844 |
| COX17         | yellow | -0.251 | -0.656 |
| CPE           | yellow | 0.814  | 0.911  |
| CPT1A         | yellow | 0.699  | 0.866  |
| CPT2          | yellow | 0.940  | 0.891  |
| CREB3L4       | yellow | 0.778  | 0.827  |
| CRYL1         | yellow | 0.827  | 0.896  |
| CSRP1         | yellow | 0.858  | 0.790  |
| CST3          | yellow | 0.717  | 0.934  |
| CTA-85E5.10   | yellow | 0.853  | 0.732  |
| CTB-109A12.1  | yellow | 0.677  | 0.699  |
| CTC-338M12.5  | yellow | 0.536  | 0.650  |
| CTD-2201I18.1 | yellow | 0.581  | 0.902  |
| CTD-2213F21.2 | yellow | 0.653  | 0.603  |
| CTD-2313N18.4 | yellow | 0.759  | 0.370  |
| CTD-2514K5.2  | yellow | 0.841  | 0.855  |
| CTD-2536I1.1  | yellow | -0.675 | -0.786 |
| CTF1          | yellow | 0.907  | 0.917  |

|            |        |        |        |
|------------|--------|--------|--------|
| CTSH       | yellow | 0.790  | 0.863  |
| CTSO       | yellow | 0.641  | 0.612  |
| CUBN       | yellow | 0.745  | 0.713  |
| CXCR7      | yellow | 0.782  | 0.904  |
| CXorf56    | yellow | -0.646 | -0.662 |
| CYBRD1     | yellow | 0.825  | 0.926  |
| CYP11A1    | yellow | 0.914  | 0.591  |
| CYP2U1     | yellow | 0.554  | 0.346  |
| DACH1      | yellow | -0.461 | -0.714 |
| DAG1       | yellow | 0.874  | 0.708  |
| DAPL1      | yellow | -0.724 | -0.456 |
| DAZAP1     | yellow | 0.509  | 0.367  |
| DBI        | yellow | 0.727  | 0.907  |
| DBR1       | yellow | 0.856  | 0.678  |
| DCTPP1     | yellow | -0.842 | -0.862 |
| DDO        | yellow | 0.909  | 0.612  |
| DDX39B     | yellow | 0.683  | 0.683  |
| DDX60L     | yellow | 0.157  | 0.638  |
| DGKH       | yellow | -0.748 | -0.661 |
| DHTKD1     | yellow | 0.882  | 0.952  |
| DICER1-AS1 | yellow | 0.668  | 0.771  |
| DLEU7      | yellow | -0.758 | -0.898 |
| DLGAP2     | yellow | -0.457 | -0.876 |
| DMRTA1     | yellow | 0.816  | 0.762  |
| DNAJB13    | yellow | 0.644  | 0.464  |
| DNAJC19    | yellow | -0.477 | -0.833 |
| DNALI1     | yellow | 0.763  | 0.632  |
| DNASE2     | yellow | 0.809  | 0.777  |
| DNMBP      | yellow | 0.737  | 0.913  |
| DNMT3B     | yellow | 0.567  | 0.672  |
| DOCK7      | yellow | 0.863  | 0.906  |
| DOK1       | yellow | 0.714  | 0.767  |
| DPY19L2P1  | yellow | -0.741 | -0.673 |
| DPY19L3    | yellow | 0.788  | 0.916  |
| DSTN       | yellow | -0.844 | -0.851 |
| DTNA       | yellow | 0.898  | 0.857  |
| DUOX1      | yellow | 0.727  | 0.516  |
| DYNLT1     | yellow | 0.851  | 0.872  |
| ECI2       | yellow | 0.759  | 0.585  |
| EDA        | yellow | 0.865  | 0.564  |
| EGLN3      | yellow | 0.824  | 0.975  |
| EHMT1      | yellow | 0.797  | 0.811  |
| EIF4A2     | yellow | -0.859 | -0.789 |
| EIF4E      | yellow | -0.622 | -0.559 |
| EIF4G3     | yellow | -0.780 | -0.833 |
| ELAC1      | yellow | 0.598  | 0.563  |
| ELMOD1     | yellow | -0.823 | -0.950 |

|             |        |        |        |
|-------------|--------|--------|--------|
| EMID1       | yellow | 0.799  | 0.854  |
| EMILIN1     | yellow | 0.742  | 0.860  |
| EMX2OS      | yellow | 0.902  | 0.840  |
| ENDOU       | yellow | 0.869  | 0.720  |
| ENO3        | yellow | 0.646  | 0.465  |
| ENSA        | yellow | -0.603 | -0.864 |
| EPB41L1     | yellow | -0.881 | -0.932 |
| EPB41L5     | yellow | 0.730  | 0.902  |
| EPHB1       | yellow | 0.748  | 0.308  |
| EPHX1       | yellow | 0.920  | 0.914  |
| EPHX2       | yellow | 0.906  | 0.592  |
| EPOR        | yellow | 0.799  | 0.855  |
| ERBB2       | yellow | 0.902  | 0.949  |
| ERC2        | yellow | -0.737 | -0.507 |
| ERF         | yellow | 0.734  | 0.500  |
| ERLIN2      | yellow | 0.851  | 0.873  |
| ESYT2       | yellow | -0.780 | -0.475 |
| EVC         | yellow | 0.894  | 0.953  |
| EVPL        | yellow | -0.610 | -0.421 |
| EWSR1       | yellow | 0.403  | 0.473  |
| EXO1        | yellow | -0.403 | -0.357 |
| EYA2        | yellow | 0.918  | 0.911  |
| EZR         | yellow | 0.917  | 0.947  |
| FADS2       | yellow | 0.915  | 0.851  |
| FAH         | yellow | 0.787  | 0.850  |
| FAM108C1    | yellow | 0.561  | 0.530  |
| FAM162B     | yellow | -0.872 | -0.640 |
| FAM167A     | yellow | 0.922  | 0.805  |
| FAM181A-AS1 | yellow | 0.968  | 0.703  |
| FAM19A3     | yellow | -0.513 | -0.495 |
| FAM59B      | yellow | 0.959  | 0.921  |
| FAM84A      | yellow | -0.597 | -0.845 |
| FAT1        | yellow | 0.828  | 0.873  |
| FBLN1       | yellow | 0.807  | 0.887  |
| FBRS        | yellow | 0.702  | 0.354  |
| FBXO24      | yellow | 0.820  | 0.556  |
| FBXO25      | yellow | -0.643 | -0.836 |
| FBXO39      | yellow | 0.535  | 0.547  |
| FBXO46      | yellow | 0.816  | 0.528  |
| FBXO8       | yellow | 0.942  | 0.874  |
| FBXO9       | yellow | -0.853 | -0.940 |
| FBXW8       | yellow | 0.830  | 0.795  |
| FCGRT       | yellow | 0.843  | 0.758  |
| FER1L6      | yellow | -0.527 | -0.551 |
| FERMT2      | yellow | 0.864  | 0.979  |
| FGF12       | yellow | -0.744 | -0.875 |
| FGF13       | yellow | -0.836 | -0.895 |



|           |        |        |        |
|-----------|--------|--------|--------|
| FIBIN     | yellow | 0.903  | 0.817  |
| FILIP1LP1 | yellow | 0.626  | 0.677  |
| FLT3LG    | yellow | 0.816  | 0.906  |
| FMO5      | yellow | 0.815  | 0.815  |
| FNDC9     | yellow | -0.433 | -0.631 |
| FNTB      | yellow | 0.690  | 0.508  |
| FOLR1     | yellow | 0.632  | 0.692  |
| FUBP3     | yellow | 0.671  | 0.898  |
| FUT10     | yellow | 0.874  | 0.978  |
| FXD2      | yellow | 0.439  | 0.613  |
| FYCO1     | yellow | 0.760  | 0.765  |
| FZD1      | yellow | 0.701  | 0.836  |
| FZD7      | yellow | 0.819  | 0.778  |
| FZD8      | yellow | 0.827  | 0.810  |
| GABARAPL1 | yellow | -0.938 | -0.854 |
| GALM      | yellow | 0.896  | 0.678  |
| GALNT11   | yellow | -0.871 | -0.941 |
| GALNTL5   | yellow | -0.723 | -0.869 |
| GATM      | yellow | 0.842  | 0.838  |
| GCDH      | yellow | 0.653  | 0.831  |
| GDPD2     | yellow | 0.896  | 0.886  |
| GFOD1     | yellow | -0.607 | -0.623 |
| GHITM     | yellow | -0.809 | -0.879 |
| GLI1      | yellow | 0.826  | 0.944  |
| GLRA1     | yellow | 0.736  | 0.359  |
| GLTPD2    | yellow | -0.221 | -0.541 |
| GLUD1     | yellow | 0.915  | 0.873  |
| GLUD2     | yellow | 0.971  | 0.861  |
| GNA12     | yellow | 0.939  | 0.920  |
| GNB5      | yellow | -0.737 | -0.822 |
| GOLIM4    | yellow | 0.941  | 0.976  |
| GOT2      | yellow | -0.834 | -0.904 |
| GPAM      | yellow | 0.921  | 0.767  |
| GPM6B     | yellow | 0.671  | 0.874  |
| GPR125    | yellow | 0.911  | 0.960  |
| GPR137B   | yellow | 0.832  | 0.890  |
| GPR143    | yellow | 0.894  | 0.918  |
| GPRC5C    | yellow | 0.834  | 0.805  |
| GPT       | yellow | 0.525  | 0.481  |
| GPT2      | yellow | 0.947  | 0.851  |
| GREB1     | yellow | 0.844  | 0.377  |
| GRIP2     | yellow | -0.649 | -0.800 |
| GRM8      | yellow | -0.729 | -0.795 |
| GRTP1     | yellow | 0.848  | 0.901  |
| GSTM2     | yellow | 0.897  | 0.804  |
| GTF2H1    | yellow | -0.827 | -0.784 |
| GUCY2C    | yellow | 0.647  | 0.380  |

|          |        |        |        |
|----------|--------|--------|--------|
| HADHA    | yellow | 0.913  | 0.903  |
| HADHB    | yellow | 0.905  | 0.900  |
| HAUS4    | yellow | 0.930  | 0.843  |
| HAUS8    | yellow | 0.517  | 0.622  |
| HCCS     | yellow | -0.732 | -0.842 |
| HDAC1    | yellow | 0.906  | 0.810  |
| HEATR5A  | yellow | 0.664  | 0.879  |
| HEATR8   | yellow | 0.594  | 0.807  |
| HEPACAM  | yellow | 0.873  | 0.875  |
| HERPUD2  | yellow | 0.714  | 0.926  |
| HES6     | yellow | 0.610  | 0.781  |
| HEY2     | yellow | 0.681  | 0.741  |
| HFE      | yellow | 0.711  | 0.722  |
| HIST1H1C | yellow | 0.756  | 0.835  |
| HIST1H4H | yellow | -0.707 | -0.839 |
| HMGCL    | yellow | 0.717  | 0.860  |
| HMGCLL1  | yellow | -0.858 | -0.831 |
| HNRNP2   | yellow | -0.702 | -0.679 |
| HNRNPUL1 | yellow | 0.843  | 0.701  |
| HPRT1    | yellow | -0.874 | -0.863 |
| HSD17B14 | yellow | 0.558  | 0.895  |
| HSD17B6  | yellow | 0.913  | 0.949  |
| HSD17B8  | yellow | 0.528  | 0.501  |
| HSDL2    | yellow | 0.836  | 0.874  |
| HSPB3    | yellow | -0.769 | -0.586 |
| HTR3E    | yellow | 0.701  | 0.375  |
| HTRA1    | yellow | 0.895  | 0.860  |
| HVCN1    | yellow | 0.848  | 0.965  |
| IFIT3    | yellow | 0.634  | 0.896  |
| IGDCC4   | yellow | 0.797  | 0.743  |
| IGSF1    | yellow | 0.553  | 0.558  |
| IL17RA   | yellow | 0.803  | 0.747  |
| IL17RB   | yellow | 0.903  | 0.786  |
| IL17RC   | yellow | 0.626  | 0.833  |
| IL17RD   | yellow | 0.843  | 0.937  |
| IL33     | yellow | 0.862  | 0.945  |
| IMPA2    | yellow | 0.791  | 0.904  |
| INHBB    | yellow | 0.947  | 0.791  |
| INPP1    | yellow | 0.645  | 0.575  |
| INPPL1   | yellow | 0.958  | 0.941  |
| INTU     | yellow | 0.863  | 0.879  |
| IRF2     | yellow | 0.850  | 0.917  |
| IRF6     | yellow | -0.567 | -0.272 |
| IRF9     | yellow | 0.874  | 0.892  |
| IST1     | yellow | 0.747  | 0.667  |
| ITGA7    | yellow | 0.830  | 0.918  |
| ITGB1BP1 | yellow | -0.837 | -0.826 |

|           |        |        |        |
|-----------|--------|--------|--------|
| ITGB5     | yellow | 0.943  | 0.865  |
| ITM2C     | yellow | 0.897  | 0.837  |
| IVD       | yellow | 0.545  | 0.461  |
| IZUMO4    | yellow | 0.884  | 0.957  |
| JARID2    | yellow | 0.577  | 0.682  |
| KANK1     | yellow | 0.787  | 0.876  |
| KCMF1     | yellow | -0.904 | -0.910 |
| KCNE1L    | yellow | 0.868  | 0.368  |
| KCNN3     | yellow | 0.823  | 0.936  |
| KCTD18    | yellow | 0.673  | 0.645  |
| KCTD5     | yellow | 0.873  | 0.855  |
| KCTD8     | yellow | -0.658 | -0.560 |
| KDM3B     | yellow | 0.571  | 0.443  |
| KIAA0141  | yellow | 0.519  | 0.677  |
| KIAA0391  | yellow | 0.538  | 0.701  |
| KIAA1797  | yellow | -0.778 | -0.852 |
| KIF7      | yellow | 0.567  | 0.847  |
| KIRREL2   | yellow | -0.398 | -0.682 |
| KLF15     | yellow | 0.845  | 0.971  |
| KLRD1     | yellow | 0.538  | 0.450  |
| KREMEN1   | yellow | 0.605  | 0.791  |
| KRT5      | yellow | -0.545 | -0.722 |
| LAP3      | yellow | 0.675  | 0.868  |
| LAPTM4A   | yellow | 0.829  | 0.943  |
| LCN12     | yellow | 0.690  | 0.954  |
| LCNL1     | yellow | 0.718  | 0.722  |
| LDHA      | yellow | -0.793 | -0.921 |
| LIMK2     | yellow | 0.898  | 0.855  |
| LINC00092 | yellow | 0.832  | 0.828  |
| LINC00299 | yellow | 0.783  | 0.833  |
| LINC00460 | yellow | -0.506 | -0.830 |
| LOXL3     | yellow | 0.777  | 0.763  |
| LPIN1     | yellow | 0.566  | 0.855  |
| LPIN3     | yellow | 0.687  | 0.777  |
| LRP5      | yellow | 0.853  | 0.522  |
| LRRC16A   | yellow | 0.833  | 0.898  |
| LRRC28    | yellow | -0.757 | -0.657 |
| LRRC3B    | yellow | 0.774  | 0.871  |
| LRRC42    | yellow | 0.687  | 0.595  |
| LRRC8A    | yellow | 0.820  | 0.940  |
| LY86-AS1  | yellow | -0.549 | -0.930 |
| LYPD1     | yellow | 0.608  | 0.673  |
| MACF1     | yellow | 0.863  | 0.865  |
| MAGED1    | yellow | -0.725 | -0.698 |
| MAOA      | yellow | 0.777  | 0.878  |
| MAOB      | yellow | 0.843  | 0.389  |
| MAP1B     | yellow | -0.858 | -0.826 |

|            |        |        |        |
|------------|--------|--------|--------|
| MAP2       | yellow | -0.765 | -0.909 |
| MAP2K4     | yellow | -0.886 | -0.885 |
| MAPK4      | yellow | 0.731  | 0.687  |
| MAPK9      | yellow | -0.887 | -0.882 |
| MAPKAPK2   | yellow | 0.912  | 0.900  |
| MAPKAPK3   | yellow | 0.902  | 0.973  |
| MAVS       | yellow | 0.832  | 0.849  |
| MCC        | yellow | 0.808  | 0.971  |
| MCCC1-AS1  | yellow | 0.949  | 0.709  |
| MCMBP      | yellow | 0.737  | 0.809  |
| MCOLN2     | yellow | 0.576  | 0.496  |
| MEAF6      | yellow | -0.842 | -0.874 |
| MED26      | yellow | 0.733  | 0.745  |
| MICA       | yellow | 0.595  | 0.886  |
| MICALL2    | yellow | 0.758  | 0.835  |
| MID1       | yellow | 0.929  | 0.905  |
| MIDN       | yellow | 0.743  | 0.718  |
| MIR181A2HG | yellow | 0.510  | 0.727  |
| MLLT11     | yellow | -0.734 | -0.897 |
| MMD2       | yellow | 0.771  | 0.881  |
| MMP19      | yellow | 0.659  | 0.751  |
| MMP28      | yellow | 0.901  | 0.855  |
| MOAP1      | yellow | -0.884 | -0.852 |
| MOB3C      | yellow | 0.731  | 0.894  |
| MORC4      | yellow | 0.768  | 0.826  |
| MOV10      | yellow | 0.893  | 0.863  |
| MPPED2     | yellow | -0.864 | -0.776 |
| MPST       | yellow | 0.892  | 0.858  |
| MR1        | yellow | 0.699  | 0.866  |
| MREG       | yellow | -0.707 | -0.707 |
| MRFAP1     | yellow | -0.551 | -0.725 |
| MRO        | yellow | 0.796  | 0.688  |
| MRPL46     | yellow | -0.721 | -0.797 |
| MRVI1      | yellow | 0.886  | 0.929  |
| MSH5       | yellow | 0.652  | 0.688  |
| MSI1       | yellow | 0.822  | 0.910  |
| MSI2       | yellow | 0.891  | 0.934  |
| MSN        | yellow | 0.904  | 0.931  |
| MT1F       | yellow | 0.697  | 0.924  |
| MTA2       | yellow | 0.897  | 0.801  |
| MTHFS      | yellow | 0.557  | 0.515  |
| MTHFSD     | yellow | 0.809  | 0.630  |
| MYBPC1     | yellow | 0.807  | 0.634  |
| MYH3       | yellow | 0.486  | 0.850  |
| MYLK       | yellow | 0.836  | 0.512  |
| MYO10      | yellow | 0.923  | 0.867  |
| MYOM1      | yellow | 0.764  | 0.516  |

|           |        |        |        |
|-----------|--------|--------|--------|
| MYOZ2     | yellow | 0.499  | 0.572  |
| NACC2     | yellow | 0.935  | 0.884  |
| NAPSA     | yellow | 0.769  | 0.451  |
| NAV2      | yellow | 0.488  | 0.914  |
| NBPF10    | yellow | 0.817  | 0.949  |
| NCAN      | yellow | 0.801  | 0.863  |
| NDP       | yellow | 0.884  | 0.495  |
| NDRG2     | yellow | 0.826  | 0.787  |
| NDRG3     | yellow | -0.945 | -0.865 |
| NDRG4     | yellow | -0.796 | -0.855 |
| NDUFA4    | yellow | -0.706 | -0.833 |
| NDUFC2    | yellow | -0.733 | -0.927 |
| NECAP1    | yellow | -0.809 | -0.860 |
| NECAP2    | yellow | 0.899  | 0.930  |
| NEDD4L    | yellow | -0.589 | -0.926 |
| NEFL      | yellow | -0.872 | -0.874 |
| NEIL2     | yellow | -0.967 | -0.760 |
| NEK6      | yellow | 0.945  | 0.859  |
| NFATC4    | yellow | 0.916  | 0.968  |
| NHP2      | yellow | -0.468 | -0.734 |
| NHSL1     | yellow | 0.939  | 0.885  |
| NID1      | yellow | 0.699  | 0.926  |
| NINL      | yellow | 0.700  | 0.701  |
| NKAIN4    | yellow | 0.875  | 0.522  |
| NOD1      | yellow | 0.694  | 0.647  |
| NOVA1     | yellow | -0.650 | -0.758 |
| NPAS3     | yellow | 0.939  | 0.966  |
| NPFFR1    | yellow | 0.912  | 0.624  |
| NPTX2     | yellow | -0.534 | -0.684 |
| NQO1      | yellow | 0.931  | 0.847  |
| NR2E1     | yellow | 0.850  | 0.920  |
| NR6A1     | yellow | 0.729  | 0.864  |
| NT5C2     | yellow | 0.793  | 0.691  |
| NT5E      | yellow | 0.849  | 0.537  |
| NTRK2     | yellow | 0.854  | 0.940  |
| NTSR2     | yellow | 0.933  | 0.941  |
| NUDT10    | yellow | -0.841 | -0.926 |
| NUDT11    | yellow | -0.825 | -0.916 |
| OAF       | yellow | 0.750  | 0.904  |
| OBFC1     | yellow | -0.673 | -0.884 |
| OLA1      | yellow | -0.855 | -0.867 |
| OLFM2     | yellow | 0.733  | 0.837  |
| OPLAH     | yellow | 0.896  | 0.882  |
| OPTN      | yellow | -0.930 | -0.930 |
| ORAI3     | yellow | 0.894  | 0.918  |
| OSGIN1    | yellow | 0.800  | 0.841  |
| PABPC1L2A | yellow | -0.710 | -0.854 |

|           |        |        |        |
|-----------|--------|--------|--------|
| PAFAH2    | yellow | 0.741  | 0.742  |
| PALLD     | yellow | 0.863  | 0.877  |
| PAMR1     | yellow | 0.906  | 0.943  |
| PAQR8     | yellow | 0.736  | 0.639  |
| PARD3B    | yellow | 0.862  | 0.931  |
| PARP2     | yellow | -0.686 | -0.708 |
| PART1     | yellow | -0.834 | -0.937 |
| PAX6      | yellow | 0.876  | 0.819  |
| PBXIP1    | yellow | 0.955  | 0.955  |
| PCBP1-AS1 | yellow | 0.795  | 0.667  |
| PCDHB3    | yellow | -0.611 | -0.619 |
| PCDHB4    | yellow | 0.716  | 0.643  |
| PCDHB5    | yellow | 0.733  | 0.595  |
| PCDHB7    | yellow | 0.338  | 0.858  |
| PCDHGA11  | yellow | 0.775  | 0.543  |
| PCDHGA8   | yellow | 0.418  | 0.552  |
| PCDHGB1   | yellow | 0.795  | 0.623  |
| PCDHGB2   | yellow | 0.775  | 0.745  |
| PCDHGB7   | yellow | 0.847  | 0.743  |
| PCLO      | yellow | -0.820 | -0.495 |
| PCSK2     | yellow | -0.878 | -0.892 |
| PCTP      | yellow | 0.503  | 0.895  |
| PDE4A     | yellow | -0.485 | -0.823 |
| PDGFRL    | yellow | 0.757  | 0.587  |
| PDLIM3    | yellow | 0.929  | 0.928  |
| PDLIM5    | yellow | 0.856  | 0.956  |
| PEX11A    | yellow | 0.917  | 0.824  |
| PEX11G    | yellow | 0.424  | 0.607  |
| PEX26     | yellow | -0.807 | -0.912 |
| PFN2      | yellow | -0.891 | -0.872 |
| PGAM1     | yellow | -0.852 | -0.895 |
| PGK1      | yellow | -0.811 | -0.864 |
| PGM1      | yellow | 0.821  | 0.886  |
| PHEX      | yellow | 0.818  | 0.687  |
| PHF19     | yellow | 0.821  | 0.749  |
| PHF21B    | yellow | 0.837  | 0.914  |
| PHGDH     | yellow | 0.934  | 0.931  |
| PHKA1     | yellow | 0.903  | 0.921  |
| PHKG1     | yellow | 0.891  | 0.977  |
| PHYHD1    | yellow | 0.892  | 0.922  |
| PIAS4     | yellow | 0.707  | 0.517  |
| PIEZO1    | yellow | 0.842  | 0.821  |
| PIGV      | yellow | 0.783  | 0.769  |
| PINK1     | yellow | -0.822 | -0.709 |
| PIPOX     | yellow | 0.902  | 0.844  |
| PITHD1    | yellow | -0.688 | -0.871 |
| PITPNA    | yellow | -0.743 | -0.843 |

|            |        |        |        |
|------------|--------|--------|--------|
| PITPNC1    | yellow | 0.827  | 0.925  |
| PLCB3      | yellow | 0.904  | 0.945  |
| PLCB4      | yellow | -0.703 | -0.941 |
| PLCD1      | yellow | 0.940  | 0.951  |
| PLD2       | yellow | 0.884  | 0.957  |
| PLEKHA4    | yellow | 0.744  | 0.865  |
| PLEKHA7    | yellow | 0.951  | 0.811  |
| PLEKHO2    | yellow | 0.894  | 0.944  |
| PLIN1      | yellow | 0.854  | 0.697  |
| PLIN4      | yellow | 0.960  | 0.751  |
| PLSCR4     | yellow | 0.948  | 0.919  |
| PMS2P5     | yellow | -0.946 | -0.756 |
| PNMA1      | yellow | -0.803 | -0.818 |
| POLE3      | yellow | -0.678 | -0.779 |
| PON2       | yellow | 0.866  | 0.978  |
| POU2F1     | yellow | 0.960  | 0.789  |
| POU3F2     | yellow | 0.685  | 0.425  |
| POU3F3     | yellow | 0.734  | 0.237  |
| POU3F4     | yellow | 0.779  | 0.425  |
| POU4F1-AS1 | yellow | 0.858  | 0.830  |
| PPARA      | yellow | 0.920  | 0.965  |
| PPEF1      | yellow | -0.808 | -0.853 |
| PPIC       | yellow | 0.905  | 0.850  |
| PPIL1      | yellow | -0.747 | -0.928 |
| PPP1R32    | yellow | 0.719  | 0.836  |
| PPP1R3D    | yellow | 0.855  | 0.967  |
| PPP1R9A    | yellow | -0.758 | -0.760 |
| PPP2CA     | yellow | -0.755 | -0.895 |
| PRDM16     | yellow | 0.984  | 0.856  |
| PRDX6      | yellow | 0.962  | 0.871  |
| PRELP      | yellow | 0.901  | 0.780  |
| PRKD1      | yellow | 0.486  | 0.806  |
| PRPF38A    | yellow | 0.653  | 0.911  |
| PRTFDC1    | yellow | 0.799  | 0.818  |
| PSAT1      | yellow | 0.808  | 0.860  |
| PSD2       | yellow | 0.955  | 0.937  |
| PSMD1      | yellow | -0.873 | -0.573 |
| PTCH1      | yellow | 0.875  | 0.298  |
| PTGDS      | yellow | 0.862  | 0.873  |
| PTK6       | yellow | 0.713  | 0.534  |
| PTPN13     | yellow | 0.626  | 0.839  |
| PTPN9      | yellow | 0.628  | 0.653  |
| PTPRVP     | yellow | 0.643  | 0.461  |
| PVRL2      | yellow | 0.513  | 0.844  |
| PYGM       | yellow | 0.842  | 0.873  |
| RAB11FIP5  | yellow | -0.864 | -0.863 |
| RAB34      | yellow | 0.951  | 0.988  |

|                |        |        |        |
|----------------|--------|--------|--------|
| RALB           | yellow | -0.728 | -0.868 |
| RANBP9         | yellow | -0.882 | -0.727 |
| RARRES2        | yellow | 0.670  | 0.600  |
| RARRES3        | yellow | 0.897  | 0.773  |
| RAVER1         | yellow | 0.900  | 0.812  |
| RBM28          | yellow | 0.642  | 0.807  |
| RBM38          | yellow | 0.792  | 0.837  |
| RBM42          | yellow | 0.799  | 0.496  |
| RDH10          | yellow | 0.863  | 0.930  |
| RDH16          | yellow | 0.512  | 0.371  |
| RELA           | yellow | 0.873  | 0.871  |
| RETSAT         | yellow | 0.737  | 0.597  |
| RFPL1-AS1      | yellow | -0.702 | -0.612 |
| RFX2           | yellow | 0.880  | 0.876  |
| RGMA           | yellow | 0.765  | 0.884  |
| RGN            | yellow | 0.561  | 0.888  |
| RHOC           | yellow | 0.862  | 0.907  |
| RHOJ           | yellow | 0.807  | 0.975  |
| RIBC1          | yellow | 0.734  | 0.841  |
| RIT2           | yellow | -0.568 | -0.830 |
| RNF175         | yellow | -0.737 | -0.854 |
| RNF43          | yellow | 0.784  | 0.449  |
| RNF6           | yellow | -0.733 | -0.797 |
| RNMT           | yellow | -0.846 | -0.853 |
| ROPN1L         | yellow | -0.626 | -0.334 |
| RP11-103C16.2  | yellow | 0.751  | 0.571  |
| RP11-113K21.4  | yellow | 0.678  | 0.817  |
| RP11-1334A24.4 | yellow | 0.756  | 0.451  |
| RP11-17L5.4    | yellow | -0.687 | -0.930 |
| RP11-224O19.2  | yellow | 0.780  | 0.869  |
| RP11-244H3.1   | yellow | 0.502  | 0.441  |
| RP11-274K13.2  | yellow | 0.735  | 0.586  |
| RP11-274N19.2  | yellow | 0.852  | 0.925  |
| RP11-291L22.3  | yellow | 0.545  | 0.626  |
| RP11-295P9.3   | yellow | 0.898  | 0.899  |
| RP11-296L22.8  | yellow | 0.735  | 0.386  |
| RP11-298I3.1   | yellow | 0.623  | 0.879  |
| RP11-315O6.1   | yellow | 0.601  | 0.615  |
| RP11-323F5.2   | yellow | 0.485  | 0.562  |
| RP11-325F22.4  | yellow | 0.641  | 0.554  |
| RP11-330M2.7   | yellow | 0.794  | 0.803  |
| RP11-347C12.1  | yellow | 0.668  | 0.481  |
| RP11-358M11.2  | yellow | 0.540  | 0.742  |
| RP11-364P22.1  | yellow | -0.550 | -0.562 |
| RP11-366K18.3  | yellow | 0.788  | 0.473  |
| RP11-367J11.2  | yellow | 0.918  | 0.575  |
| RP11-367J11.3  | yellow | 0.645  | 0.526  |



|                |        |        |        |
|----------------|--------|--------|--------|
| RP11-368J21.3  | yellow | -0.656 | -0.609 |
| RP11-394B2.4   | yellow | 0.849  | 0.826  |
| RP11-397D12.6  | yellow | 0.600  | 0.542  |
| RP11-3L21.2    | yellow | 0.359  | 0.705  |
| RP11-429J17.2  | yellow | 0.397  | 0.442  |
| RP11-453F18__B | yellow | 0.809  | 0.586  |
| RP11-518D3.1   | yellow | 0.796  | 0.886  |
| RP11-540A21.3  | yellow | -0.524 | -0.279 |
| RP11-569G13.2  | yellow | 0.683  | 0.674  |
| RP11-579E24.1  | yellow | -0.498 | -0.437 |
| RP11-598F7.5   | yellow | -0.459 | -0.624 |
| RP11-65D13.1   | yellow | 0.754  | 0.741  |
| RP11-678P16.1  | yellow | 0.507  | 0.859  |
| RP11-69L16.4   | yellow | 0.561  | 0.459  |
| RP11-727A23.10 | yellow | 0.921  | 0.677  |
| RP11-807H7.1   | yellow | -0.868 | -0.547 |
| RP11-80H5.4    | yellow | 0.399  | 0.477  |
| RP11-843P14.2  | yellow | 0.660  | 0.518  |
| RP1-20N2.6     | yellow | 0.815  | 0.590  |
| RP13-137A17.6  | yellow | -0.409 | -0.732 |
| RP13-895J2.3   | yellow | -0.575 | -0.517 |
| RP13-941N14.1  | yellow | 0.590  | 0.377  |
| RP1-5O6.5      | yellow | 0.537  | 0.410  |
| RP1-5O6.6      | yellow | 0.822  | 0.709  |
| RP4-673D20.3   | yellow | 0.884  | 0.974  |
| RP4-717I23.3   | yellow | 0.716  | 0.893  |
| RP4-740C4.5    | yellow | -0.622 | -0.704 |
| RP5-1021I20.5  | yellow | 0.688  | 0.841  |
| RP5-907D15.2   | yellow | 0.693  | 0.290  |
| RPL15          | yellow | -0.731 | -0.757 |
| RPP14          | yellow | 0.704  | 0.684  |
| RRP1B          | yellow | 0.562  | 0.409  |
| RSPH3          | yellow | -0.557 | -0.553 |
| RTN4           | yellow | -0.812 | -0.932 |
| RXRA           | yellow | 0.773  | 0.469  |
| RXRG           | yellow | 0.511  | 0.489  |
| RYR2           | yellow | -0.906 | -0.912 |
| RYR3           | yellow | 0.955  | 0.959  |
| S100A1         | yellow | 0.775  | 0.913  |
| SALL4          | yellow | 0.840  | 0.441  |
| SBF2           | yellow | 0.938  | 0.830  |
| SCAF4          | yellow | 0.734  | 0.610  |
| SCAMP2         | yellow | 0.872  | 0.858  |
| SCARA3         | yellow | 0.884  | 0.932  |
| SCARNA17       | yellow | 0.833  | 0.617  |
| SCLY           | yellow | 0.520  | 0.545  |
| SCN2B          | yellow | -0.854 | -0.910 |

|          |        |        |        |
|----------|--------|--------|--------|
| SDC2     | yellow | 0.838  | 0.945  |
| SDC3     | yellow | 0.801  | 0.684  |
| SDR16C5  | yellow | -0.759 | -0.924 |
| SEC61A1  | yellow | 0.779  | 0.825  |
| SELENBP1 | yellow | 0.926  | 0.929  |
| SEMA4B   | yellow | 0.749  | 0.966  |
| SEPN1    | yellow | 0.856  | 0.792  |
| SERPINB6 | yellow | 0.692  | 0.758  |
| SFXN5    | yellow | 0.820  | 0.874  |
| SGCD     | yellow | 0.738  | 0.837  |
| SGPL1    | yellow | 0.914  | 0.880  |
| SH3D21   | yellow | -0.653 | -0.683 |
| SIX5     | yellow | 0.894  | 0.849  |
| SKP1     | yellow | -0.751 | -0.907 |
| SLC12A4  | yellow | 0.878  | 0.905  |
| SLC1A4   | yellow | 0.792  | 0.705  |
| SLC22A5  | yellow | 0.892  | 0.773  |
| SLC22A6  | yellow | 0.512  | 0.673  |
| SLC25A14 | yellow | -0.681 | -0.815 |
| SLC25A18 | yellow | 0.888  | 0.903  |
| SLC25A20 | yellow | 0.966  | 0.923  |
| SLC25A26 | yellow | -0.780 | -0.619 |
| SLC25A27 | yellow | -0.677 | -0.891 |
| SLC26A4  | yellow | -0.682 | -0.850 |
| SLC27A1  | yellow | 0.904  | 0.764  |
| SLC35F3  | yellow | -0.699 | -0.907 |
| SLC35G1  | yellow | -0.803 | -0.330 |
| SLC39A1  | yellow | 0.891  | 0.850  |
| SLC3A2   | yellow | 0.747  | 0.889  |
| SLC40A1  | yellow | 0.459  | 0.669  |
| SLC41A1  | yellow | 0.953  | 0.943  |
| SLC44A2  | yellow | 0.920  | 0.932  |
| SLC46A1  | yellow | 0.941  | 0.761  |
| SLC6A11  | yellow | 0.820  | 0.957  |
| SLC9A3R1 | yellow | 0.954  | 0.944  |
| SLC9B2   | yellow | -0.833 | -0.870 |
| SMAD1    | yellow | 0.700  | 0.737  |
| SMARCD1  | yellow | 0.535  | 0.314  |
| SMCR5    | yellow | 0.393  | 0.612  |
| SMOC1    | yellow | 0.635  | 0.378  |
| SMOX     | yellow | 0.890  | 0.953  |
| SMS      | yellow | -0.671 | -0.413 |
| SMYD2    | yellow | -0.875 | -0.760 |
| SNCAIP   | yellow | 0.553  | 0.557  |
| SNORA55  | yellow | 0.812  | 0.535  |
| SNORD104 | yellow | 0.437  | 0.628  |
| SNTA1    | yellow | 0.768  | 0.770  |

|          |        |        |        |
|----------|--------|--------|--------|
| SNX10    | yellow | -0.896 | -0.863 |
| SNX29P2  | yellow | 0.561  | 0.358  |
| SNX33    | yellow | 0.921  | 0.879  |
| SOD3     | yellow | 0.831  | 0.881  |
| SORBS3   | yellow | 0.835  | 0.896  |
| SORCS2   | yellow | 0.806  | 0.656  |
| SOX2     | yellow | 0.879  | 0.956  |
| SOX21    | yellow | 0.891  | 0.905  |
| SPATA1   | yellow | 0.753  | 0.646  |
| SPATA25  | yellow | 0.929  | 0.568  |
| SPATC1   | yellow | 0.666  | 0.771  |
| SPON2    | yellow | -0.587 | -0.659 |
| SPRYD7   | yellow | -0.620 | -0.893 |
| SRD5A1   | yellow | -0.861 | -0.922 |
| SRGAP1   | yellow | 0.877  | 0.965  |
| SRPX     | yellow | 0.790  | 0.885  |
| SSC5D    | yellow | 0.788  | 0.690  |
| SSPN     | yellow | 0.862  | 0.867  |
| ST5      | yellow | 0.760  | 0.781  |
| STAT3    | yellow | 0.821  | 0.836  |
| STBD1    | yellow | -0.827 | -0.817 |
| STK17B   | yellow | 0.865  | 0.944  |
| STK24    | yellow | -0.704 | -0.809 |
| STK33    | yellow | 0.873  | 0.920  |
| STON2    | yellow | 0.939  | 0.907  |
| STOX1    | yellow | 0.832  | 0.864  |
| STRBP    | yellow | -0.714 | -0.770 |
| SULF2    | yellow | -0.822 | -0.389 |
| SULT1C4  | yellow | 0.880  | 0.870  |
| SULT4A1  | yellow | -0.910 | -0.898 |
| SUMO3    | yellow | -0.892 | -0.932 |
| SUV420H2 | yellow | 0.889  | 0.581  |
| SYCE2    | yellow | 0.795  | 0.901  |
| SYDE1    | yellow | 0.893  | 0.840  |
| SYNPO2L  | yellow | 0.711  | 0.662  |
| SYT1     | yellow | -0.979 | -0.870 |
| TAF4     | yellow | 0.748  | 0.551  |
| TAF9     | yellow | -0.699 | -0.617 |
| TAS1R1   | yellow | 0.808  | 0.683  |
| TASP1    | yellow | -0.919 | -0.774 |
| TBC1D10A | yellow | 0.493  | 0.908  |
| TBC1D2B  | yellow | 0.755  | 0.664  |
| TBL1X    | yellow | 0.897  | 0.957  |
| TCEA3    | yellow | 0.708  | 0.826  |
| TCF3     | yellow | 0.761  | 0.798  |
| TCF7L1   | yellow | 0.900  | 0.906  |
| TCTN1    | yellow | 0.530  | 0.818  |

|          |        |        |        |
|----------|--------|--------|--------|
| TDRKH    | yellow | -0.653 | -0.872 |
| TEP1     | yellow | 0.785  | 0.864  |
| TEX261   | yellow | 0.675  | 0.603  |
| TGFBR3   | yellow | 0.856  | 0.922  |
| TGIF1    | yellow | 0.863  | 0.942  |
| THBS4    | yellow | 0.679  | 0.735  |
| THRB     | yellow | -0.605 | -0.873 |
| TIMM17A  | yellow | -0.829 | -0.817 |
| TM9SF1   | yellow | 0.602  | 0.651  |
| TMBIM6   | yellow | 0.812  | 0.883  |
| TMCO4    | yellow | 0.954  | 0.748  |
| TMEM102  | yellow | 0.820  | 0.882  |
| TMEM134  | yellow | 0.683  | 0.715  |
| TMEM138  | yellow | 0.702  | 0.886  |
| TMEM159  | yellow | -0.670 | -0.758 |
| TMEM164  | yellow | 0.635  | 0.805  |
| TMEM176A | yellow | 0.901  | 0.917  |
| TMEM177  | yellow | -0.438 | -0.728 |
| TMEM183A | yellow | -0.801 | -0.872 |
| TMEM41A  | yellow | 0.507  | 0.693  |
| TMEM47   | yellow | 0.811  | 0.903  |
| TMEM51   | yellow | 0.822  | 0.806  |
| TMEM85   | yellow | -0.477 | -0.870 |
| TMPRSS5  | yellow | 0.815  | 0.855  |
| TNFSF13  | yellow | 0.918  | 0.896  |
| TOB1     | yellow | 0.865  | 0.926  |
| TOB2     | yellow | 0.847  | 0.860  |
| TP53     | yellow | 0.854  | 0.944  |
| TP53BP2  | yellow | 0.927  | 0.973  |
| TPCN1    | yellow | 0.926  | 0.748  |
| TPD52L1  | yellow | 0.929  | 0.861  |
| TPP1     | yellow | 0.868  | 0.962  |
| TPTE2P1  | yellow | -0.524 | -0.455 |
| TRA2A    | yellow | 0.670  | 0.826  |
| TRIB1    | yellow | 0.673  | 0.722  |
| TRIM44   | yellow | -0.837 | -0.565 |
| TRIM47   | yellow | 0.850  | 0.849  |
| TRIP10   | yellow | 0.701  | 0.895  |
| TRIP6    | yellow | 0.880  | 0.970  |
| TRPS1    | yellow | 0.818  | 0.963  |
| TRPV1    | yellow | 0.653  | 0.650  |
| TSC22D4  | yellow | 0.836  | 0.944  |
| TSFM     | yellow | -0.870 | -0.910 |
| TST      | yellow | 0.917  | 0.890  |
| TTC17    | yellow | 0.745  | 0.832  |
| TTC28    | yellow | 0.739  | 0.872  |
| TTC31    | yellow | 0.871  | 0.698  |

|           |        |        |        |
|-----------|--------|--------|--------|
| TTC36     | yellow | 0.522  | 0.475  |
| TTC5      | yellow | -0.764 | -0.670 |
| TTLL4     | yellow | 0.951  | 0.891  |
| TTYH1     | yellow | 0.901  | 0.854  |
| TUBB2B    | yellow | 0.835  | 0.925  |
| TULP3     | yellow | 0.840  | 0.931  |
| TUSC3     | yellow | -0.817 | -0.910 |
| TYRP1     | yellow | -0.806 | -0.649 |
| TYW3      | yellow | -0.614 | -0.512 |
| UBAC2-AS1 | yellow | 0.575  | 0.438  |
| UFD1L     | yellow | 0.831  | 0.434  |
| UNC13C    | yellow | -0.883 | -0.514 |
| UNG       | yellow | 0.848  | 0.896  |
| UOX       | yellow | -0.608 | -0.421 |
| UQCRFS1   | yellow | -0.730 | -0.824 |
| VANGL2    | yellow | 0.705  | 0.742  |
| VPS29     | yellow | -0.696 | -0.673 |
| VPS36     | yellow | -0.818 | -0.824 |
| VWA3B     | yellow | 0.744  | 0.594  |
| VWC2      | yellow | -0.606 | -0.824 |
| WASF2     | yellow | 0.781  | 0.857  |
| WDFY3-AS2 | yellow | 0.815  | 0.772  |
| WDR45L    | yellow | 0.743  | 0.651  |
| WDR47     | yellow | -0.779 | -0.849 |
| WLS       | yellow | 0.921  | 0.859  |
| WNT7B     | yellow | 0.740  | 0.788  |
| WNT8B     | yellow | 0.562  | 0.562  |
| WWOX      | yellow | 0.766  | 0.754  |
| XKR8      | yellow | 0.942  | 0.685  |
| XKRX      | yellow | 0.776  | 0.398  |
| XRCC6     | yellow | -0.760 | -0.660 |
| YARS      | yellow | -0.828 | -0.809 |
| YIPF1     | yellow | -0.647 | -0.758 |
| YRDC      | yellow | -0.930 | -0.859 |
| ZBTB20    | yellow | 0.879  | 0.946  |
| ZBTB3     | yellow | 0.889  | 0.668  |
| ZC3H4     | yellow | 0.712  | 0.413  |
| ZEB1-AS1  | yellow | 0.541  | 0.796  |
| ZFAND3    | yellow | 0.872  | 0.862  |
| ZFHX4     | yellow | 0.866  | 0.806  |
| ZHX2      | yellow | 0.832  | 0.743  |
| ZHX3      | yellow | 0.909  | 0.927  |
| ZIC4      | yellow | 0.712  | 0.794  |
| ZNF114    | yellow | 0.823  | 0.924  |
| ZNF155    | yellow | 0.571  | 0.794  |
| ZNF177    | yellow | 0.744  | 0.759  |
| ZNF204P   | yellow | -0.712 | -0.894 |

|           |        |        |        |
|-----------|--------|--------|--------|
| ZNF211    | yellow | 0.812  | 0.902  |
| ZNF274    | yellow | 0.741  | 0.841  |
| ZNF329    | yellow | -0.821 | -0.821 |
| ZNF350    | yellow | 0.685  | 0.723  |
| ZNF395    | yellow | 0.801  | 0.820  |
| ZNF416    | yellow | 0.830  | 0.355  |
| ZNF433    | yellow | 0.502  | 0.821  |
| ZNF438    | yellow | 0.931  | 0.976  |
| ZNF443    | yellow | 0.542  | 0.806  |
| ZNF462    | yellow | 0.812  | 0.764  |
| ZNF516    | yellow | 0.856  | 0.948  |
| ZNF546    | yellow | 0.889  | 0.856  |
| ZNF572    | yellow | 0.598  | 0.823  |
| ZNF577    | yellow | 0.755  | 0.764  |
| ZNF608    | yellow | 0.688  | 0.680  |
| ZNF613    | yellow | 0.765  | 0.302  |
| ZNF629    | yellow | 0.627  | 0.397  |
| ZNF710    | yellow | 0.773  | 0.268  |
| ZNF805    | yellow | 0.792  | 0.899  |
| ZNF815    | yellow | -0.545 | -0.736 |
| ZNF844    | yellow | 0.804  | 0.672  |
| ZNF847P   | yellow | 0.894  | 0.585  |
| ZNRF3-AS1 | yellow | 0.614  | 0.892  |
| ZSCAN2    | yellow | 0.851  | 0.570  |

Supplementary Table S4: Effect of biological and technical co-variates on module eigengene

| Module         | Biological covariates |                | Technical covariates |         |                  |         |
|----------------|-----------------------|----------------|----------------------|---------|------------------|---------|
|                | Smoking               | Cause of death | RIN                  |         | Sequencing depth |         |
|                | NISC1-2               | NISC1-2        | NISC1                | NISC2   | NISC1            | NISC2   |
|                | p-value               | p-value        | p-value              | p-value | p-value          | p-value |
| darkturquoise  | 0.77                  | 0.02           | 0.97                 | 0.12    | 0.56             | 0.35    |
| green          | 0.44                  | 0.61           | 0.35                 | 0.33    | 0.56             | 0.11    |
| darkorange     | 0.79                  | 0.78           | 0.44                 | 0.07    | 1.00             | 0.03    |
| turquoise      | 0.73                  | 0.08           | 0.43                 | 0.09    | 0.29             | 0.26    |
| red            | 0.97                  | 0.83           | 0.09                 | 0.14    | 0.47             | 0.03    |
| salmon         | 0.32                  | 0.31           | 0.18                 | 0.18    | 0.53             | 0.41    |
| paleturquoise  | 0.10                  | 0.21           | 0.24                 | 0.86    | 0.51             | 0.32    |
| blue           | 0.99                  | 0.68           | 0.21                 | 0.94    | 0.34             | 0.14    |
| darkgreen      | 0.83                  | 0.42           | 0.39                 | 0.76    | 0.28             | 0.63    |
| midnightblue   | 0.12                  | 0.70           | 0.18                 | 0.64    | 0.22             | 0.91    |
| darkred        | 0.49                  | 0.04           | 0.30                 | 0.18    | 0.25             | 0.57    |
| darkolivegreen | 0.77                  | 0.11           | 0.42                 | 0.03    | 0.98             | 0.32    |
| white          | 0.32                  | 0.81           | 0.31                 | 0.32    | 0.46             | 0.04    |
| saddlebrown    | 0.86                  | 0.41           | 0.12                 | 0.34    | 0.14             | 0.11    |
| lightcyan      | 0.16                  | 0.64           | 0.20                 | 0.42    | 0.74             | 0.23    |
| royalblue      | 0.78                  | 0.67           | 0.51                 | 0.03    | 0.45             | 0.11    |
| skyblue        | 0.29                  | 0.79           | 0.97                 | 0.05    | 0.84             | 0.04    |
| lightyellow    | 0.61                  | 0.03           | 0.56                 | 0.05    | 0.62             | 0.04    |
| darkgrey       | 0.79                  | 0.64           | 0.36                 | 0.07    | 0.40             | 0.04    |
| yellow         | 0.52                  | 0.21           | 0.99                 | 0.27    | 0.71             | 0.29    |
| purple         | 0.48                  | 0.41           | 0.58                 | 0.08    | 0.77             | 0.10    |

None of the p-values were significant after multiple testing correction

Supplementary Table S5: GWAS enrichment results from MAGENTA (Segre et al., 2010)

| DB                       | GS             | ORIG_GS_SIZE | EFF_GS_SIZE | #_GENES_ABS_LIST | #_GENES_WO_SCORE | #_GENES_REM_PROXIM | MED_GEN_E_SIZE_KB | MEAN_GENE_SIZE_KB | NOMINAL_GSEA_PVAL_75PERC_CUTOFF | FDR_75PERC_CUTOFF | EXP_#_GENES_ABOVE_75PERC_CUTOFF | OBS_#_GENES_ABOVE_75PERC_CUTOFF |
|--------------------------|----------------|--------------|-------------|------------------|------------------|--------------------|-------------------|-------------------|---------------------------------|-------------------|---------------------------------|---------------------------------|
| RNAseqBackgroundGenes_db | blue           | 1383         | 1146        | 18               | 51               | 168                | 20                | 55                | 0.03                            | 0.19              | 287                             | 308                             |
| RNAseqBackgroundGenes_db | darkgreen      | 167          | 157         | 1                | 5                | 4                  | 36                | 78                | 0.12                            | 0.51              | 39                              | 46                              |
| RNAseqBackgroundGenes_db | darkgrey       | 126          | 112         | 9                | 4                | 1                  | 42                | 90                | 0.84                            | 0.94              | 28                              | 24                              |
| RNAseqBackgroundGenes_db | darkolivegreen | 57           | 47          | 3                | 7                | 0                  | 19                | 55                | 0.65                            | 0.99              | 12                              | 11                              |
| RNAseqBackgroundGenes_db | darkorange     | 126          | 117         | 3                | 5                | 1                  | 35                | 57                | 0.23                            | 0.49              | 29                              | 33                              |
| RNAseqBackgroundGenes_db | darkred        | 162          | 149         | 2                | 5                | 6                  | 17                | 32                | 0.40                            | 0.81              | 37                              | 39                              |
| RNAseqBackgroundGenes_db | darkturquoise  | 143          | 130         | 4                | 9                | 0                  | 22                | 56                | 0.20                            | 0.58              | 33                              | 37                              |
| RNAseqBackgroundGenes_db | green          | 787          | 721         | 17               | 26               | 23                 | 45                | 112               | 0.03                            | 0.28              | 180                             | 200                             |
| RNAseqBackgroundGenes_db | lightcyan      | 225          | 214         | 1                | 7                | 3                  | 25                | 48                | 0.21                            | 0.54              | 54                              | 59                              |
| RNAseqBackgroundGenes_db | lightyellow    | 175          | 159         | 6                | 10               | 0                  | 40                | 70                | 0.00                            | 0.06              | 40                              | 55                              |
| RNAseqBackgroundGenes_db | midnightblue   | 258          | 245         | 2                | 5                | 6                  | 24                | 48                | 0.64                            | 0.95              | 61                              | 59                              |
| RNAseqBackgroundGenes_db | paleturquoise  | 93           | 80          | 0                | 8                | 5                  | 26                | 47                | 0.18                            | 0.48              | 20                              | 24                              |
| RNAseqBackgroundGenes_db | purple         | 363          | 331         | 9                | 17               | 6                  | 41                | 107               | 0.09                            | 0.57              | 83                              | 93                              |
| RNAseqBackgroundGenes_db | red            | 775          | 681         | 13               | 24               | 57                 | 28                | 54                | 0.03                            | 0.14              | 170                             | 189                             |
| RNAseqBackgroundGenes_db | royalblue      | 144          | 129         | 4                | 10               | 1                  | 27                | 59                | 0.63                            | 0.73              | 32                              | 31                              |
| RNAseqBackgroundGenes_db | saddlebrown    | 109          | 100         | 3                | 3                | 3                  | 22                | 48                | 0.45                            | 0.68              | 25                              | 26                              |
| RNAseqBackgroundGenes_db | salmon         | 244          | 227         | 5                | 11               | 1                  | 33                | 75                | 0.18                            | 0.64              | 57                              | 63                              |
| RNAseqBackgroundGenes_db | skyblue        | 113          | 106         | 5                | 2                | 0                  | 39                | 85                | 0.48                            | 0.68              | 27                              | 27                              |
| RNAseqBackgroundGenes_db | white          | 116          | 111         | 0                | 2                | 3                  | 29                | 71                | 0.92                            | 0.95              | 28                              | 22                              |
| RNAseqBackgroundGenes_db | yellow         | 839          | 730         | 11               | 46               | 52                 | 32                | 79                | 0.03                            | 0.56              | 183                             | 202                             |



Supplementary Table S6: Functional enrichment of co-expressed modules in bipolar disorder

| Category          | Module      | kME (NISC1/NISC2)                               | Term                                                  | Count      | Genes       | Fold Enrich | PValue   | Benjamini |
|-------------------|-------------|-------------------------------------------------|-------------------------------------------------------|------------|-------------|-------------|----------|-----------|
| GWAs-enriched     | green       | +/+                                             | GO:0014069~postsynaptic density                       | 11         | LZTS1, GRIN | 4.6         | 1.09E-04 | 3.30E-03  |
|                   | green       | +/+                                             | GO:0045211~postsynaptic membrane                      | 16         | LZTS1, DLG  | 3.9         | 1.27E-05 | 4.83E-04  |
|                   | green       | +/+                                             | GO:0045202~synapse                                    | 35         | CDK5R1, LZ  | 3.1         | 5.61E-09 | 8.49E-07  |
|                   | green       | +/+                                             | GO:0030425~dendrite                                   | 15         | CDK5R1, AL  | 2.8         | 8.05E-04 | 2.01E-02  |
|                   | green       | +/+                                             | GO:0022803~passive transmembrane transport            | 29         | KCNC3, GAB  | 2.8         | 1.84E-06 | 4.94E-04  |
|                   | green       | +/+                                             | GO:0005261~cation channel activity                    | 19         | KCNC3, SCN  | 2.6         | 3.87E-04 | 1.87E-02  |
|                   | green       | +/+                                             | GO:0007267~cell-cell signaling                        | 32         | GABRB3, GRI | 2.5         | 4.40E-06 | 7.33E-03  |
|                   | green       | +/+                                             | GO:0007186~G-protein coupled receptor protein         | 29         | GNAZ, GPR   | 2.2         | 1.23E-04 | 4.02E-02  |
|                   | green       | +/+                                             | GO:0006811~ion transport                              | 42         | SLC8A3, KC  | 2.1         | 5.90E-06 | 4.92E-03  |
|                   | green       | +/+                                             | GO:0004672~protein kinase activity                    | 36         | CDK5R1, N   | 2.1         | 6.49E-05 | 3.86E-03  |
|                   | green       | +/+                                             | GO:0042995~cell projection                            | 37         | GPRIN1, CD  | 1.7         | 1.90E-03 | 3.77E-02  |
|                   | green       | +/+                                             | GO:0044459~plasma membrane part                       | 95         | CADM3, SL   | 1.6         | 2.66E-06 | 1.34E-04  |
|                   | green       | +/+                                             | GO:0031224~intrinsic to membrane                      | 182        | GPRIN1, SL  | 1.3         | 3.68E-07 | 2.79E-05  |
|                   | red         | -/-                                             | GO:0006396~RNA processing                             | 23         | TXNL4B, EX  | 2.9         | 9.68E-06 | 1.02E-02  |
| red               | +/+         | GO:0017076~purine nucleotide binding            | 91                                                    | ABCF3, ABC | 1.5         | 9.89E-05    | 8.92E-03 |           |
| salmon            | Neg         | GO:0045449~regulation of transcription          | 28                                                    | CARHSP1, I | 2.3         | 1.31E-05    | 9.09E-03 |           |
| Not GWAS-enriched | blue        | +/+                                             | GO:0003735~structural constituent of ribosome         | 25         | RPL19, MR   | 2.8         | 9.97E-06 | 8.14E-03  |
|                   | darkolivegr | -/-                                             | GO:0045449~regulation of transcription                | 8          | ZNF519, CN  | 3.6         | 9.45E-04 | 2.18E-02  |
|                   | darkolivegr | -/-                                             | GO:0008270~zinc ion binding                           | 7          | ZNF519, ZN  | 3.2         | 6.38E-03 | 4.99E-02  |
|                   | darkolivegr | +/+                                             | GO:0033279~ribosomal subunit                          | 4          | RPL14, RPL  | 16.5        | 1.41E-03 | 4.06E-02  |
|                   | darkred     | +/+                                             | GO:0044445~cytosolic part                             | 7          | BLOC1S3, F  | 7.7         | 2.53E-04 | 1.31E-02  |
|                   | darkred     | +/+                                             | GO:0030529~ribonucleoprotein complex                  | 12         | ABCF1, NU   | 3.8         | 2.22E-04 | 1.72E-02  |
|                   | paleturquo  | +/+                                             | GO:0002684~positive regulation of immune system       | 11         | LAT2, PLCG  | 17.0        | 5.11E-10 | 1.36E-07  |
|                   | paleturquo  | +/+                                             | GO:0045321~leukocyte activation                       | 13         | GPR183, TC  | 16.4        | 9.17E-12 | 4.88E-09  |
|                   | paleturquo  | +/+                                             | GO:0001817~regulation of cytokine production          | 7          | PYCARD, C   | 12.9        | 1.34E-05 | 6.48E-04  |
|                   | paleturquo  | +/+                                             | GO:0002520~immune system development                  | 10         | GPR183, H   | 10.1        | 4.08E-07 | 3.62E-05  |
|                   | paleturquo  | +/+                                             | GO:0006952~defense response                           | 12         | TNFAIP8L2   | 8.0         | 1.58E-07 | 1.69E-05  |
|                   | paleturquo  | +/+                                             | GO:0009611~response to wounding                       | 10         | CIITA, PTPN | 6.5         | 1.56E-05 | 7.24E-04  |
|                   | paleturquo  | +/+                                             | GO:0009967~positive regulation of signal transduction | 7          | TRIM38, H   | 6.4         | 6.65E-04 | 2.12E-02  |
|                   | paleturquo  | +/+                                             | GO:0010033~response to organic substance              | 11         | CIITA, KCN  | 4.0         | 2.81E-04 | 1.03E-02  |
|                   | royalblue   | -/-                                             | GO:0043167~ion binding                                | 22         | ZNF398, ZN  | 2.1         | 5.66E-05 | 6.66E-03  |
|                   | turquoise   | +/+                                             | GO:0016879~ligase activity, forming carbon-carbon     | 45         | ADSS, HEC   | 2.0         | 6.99E-06 | 3.73E-03  |
|                   | turquoise   | +/+                                             | GO:0044265~cellular macromolecule catabolic process   | 116        | PPP2R5C, E  | 1.7         | 1.22E-09 | 4.32E-07  |
|                   | turquoise   | +/+                                             | GO:0009057~macromolecule catabolic process            | 120        | PPP2R5C, E  | 1.7         | 3.00E-09 | 9.46E-07  |
|                   | turquoise   | +/+                                             | GO:0008104~protein localization                       | 139        | ALS2, RAB3  | 1.7         | 1.46E-10 | 8.29E-08  |
|                   | turquoise   | +/+                                             | GO:0006508~proteolysis                                | 132        | PPP2R5C, E  | 1.6         | 1.39E-07 | 3.59E-05  |
|                   | turquoise   | +/+                                             | GO:0016192~vesicle-mediated transport                 | 80         | ALS2, ATL2  | 1.5         | 7.96E-05 | 1.60E-02  |
|                   | turquoise   | +/+                                             | GO:0046907~intracellular transport                    | 93         | ALS2, GRPE  | 1.5         | 3.62E-05 | 7.86E-03  |
|                   | yellow      | +/+                                             | GO:0046395~carboxylic acid catabolic process          | 14         | ACOX2, AL   | 3.7         | 8.19E-05 | 2.66E-02  |
|                   | yellow      | +/+                                             | GO:0016042~lipid catabolic process                    | 17         | ACOX2, SG   | 3.3         | 5.02E-05 | 2.29E-02  |
|                   | yellow      | +/+                                             | GO:0031406~carboxylic acid binding                    | 16         | ACOX2, AL   | 3.1         | 1.90E-04 | 3.33E-02  |
|                   | yellow      | +/+                                             | GO:0006631~fatty acid metabolic process               | 20         | ACOX2, AC   | 3.0         | 3.56E-05 | 4.02E-02  |
|                   | yellow      | +/+                                             | GO:0009055~electron carrier activity                  | 19         | ACOX2, CY   | 2.5         | 6.10E-04 | 4.70E-02  |
| yellow            | +/+         | GO:0045892~negative regulation of transcription | 29                                                    | PPARA, SO  | 2.3         | 4.74E-05    | 2.70E-02 |           |
| yellow            | +/+         | GO:0055114~oxidation reduction                  | 46                                                    | CYP2U1, A  | 2.0         | 7.31E-06    | 1.67E-02 |           |

Supplementary Table S7: Overlap between RNA-seq co-expression modules and Chen et al (2013a) microarray co-expression modules

| Bipolar Disorder Networks (RNA-seq) |         | Bipolar Disorder Networks (Chen et al., Microarray) |                 |                   |                  |
|-------------------------------------|---------|-----------------------------------------------------|-----------------|-------------------|------------------|
| Module Color                        | N genes | Chen et al (2013a) module                           | Overlap p-value | Corrected p-value | Gene overlap (%) |
| black                               | 777     | yellow                                              | <1.0E-16        | <1.0E-16          | 25%              |
| blue                                | 1523    | turquoise                                           | 8.44E-08        | 6.41E-05          | 30%              |
| brown                               | 1012    | blue                                                | 3.72E-09        | 2.82E-06          | 28%              |
| cyan                                | 286     | brown                                               | 1.62E-03        | ns                | 21%              |
| darkgreen                           | 175     | green                                               | 2.96E-03        | ns                | 13%              |
| darkgrey                            | 166     | black                                               | 2.10E-02        | ns                | 7%               |
| darkolivegreen                      | 74      | green                                               | 4.71E-03        | ns                | 17%              |
| darkorange                          | 141     | black                                               | 3.46E-02        | ns                | 7%               |
| darkred                             | 179     | turquoise                                           | 5.69E-04        | ns                | 35%              |
| darkturquoise                       | 166     | blue                                                | 5.39E-05        | 4.09E-02          | 34%              |
| green                               | 908     | magenta                                             | <1.0E-16        | <1.0E-16          | 8%               |
| greenyellow                         | 394     | brown                                               | 3.91E-04        | ns                | 21%              |
| grey60                              | 212     | blue                                                | 3.67E-09        | 2.78E-06          | 39%              |
| lightcyan                           | 254     | blue                                                | 3.19E-07        | 2.42E-04          | 35%              |
| lightgreen                          | 211     | black                                               | 7.80E-03        | ns                | 7%               |
| lightyellow                         | 209     | yellow                                              | <1.0E-16        | <1.0E-16          | 30%              |
| magenta                             | 519     | red                                                 | 1.92E-14        | 1.46E-11          | 16%              |
| midnightblue                        | 282     | red                                                 | 1.59E-05        | 1.20E-02          | 13%              |
| orange                              | 150     | turquoise                                           | 2.75E-05        | 2.09E-02          | 39%              |
| paleturquoise                       | 100     | cyan                                                | <1.0E-16        | <1.0E-16          | 21%              |
| pink                                | 559     | yellow                                              | <1.0E-16        | <1.0E-16          | 44%              |
| purple                              | 442     | pink                                                | <1.0E-16        | <1.0E-16          | 14%              |
| red                                 | 847     | red                                                 | 2.22E-05        | 1.68E-02          | 10%              |
| royalblue                           | 179     | green                                               | 2.97E-02        | ns                | 11%              |
| saddlebrown                         | 133     | turquoise                                           | 2.89E-04        | ns                | 39%              |
| salmon                              | 293     | brown                                               | 4.23E-08        | 3.21E-05          | 28%              |
| skyblue                             | 135     | yellow                                              | 6.47E-03        | ns                | 15%              |
| steelblue                           | 101     | red                                                 | 7.29E-03        | ns                | 12%              |
| tan                                 | 338     | red                                                 | 3.48E-11        | 2.64E-08          | 17%              |
| turquoise                           | 2766    | blue                                                | <1.0E-16        | <1.0E-16          | 32%              |
| violet                              | 99      | brown                                               | 4.78E-02        | ns                | 21%              |
| white                               | 141     | yellow                                              | 3.77E-04        | ns                | 17%              |
| yellow                              | 959     | pink                                                | <1.0E-16        | <1.0E-16          | 17%              |

Supplementary Table S8: Following is list of GWAS genes associated with BD. The list is compiled using PGC 2011, Chen et al, 2013b and Muhleisen et al, 2014

|            |
|------------|
| GWAS genes |
| ADCY2      |
| ANK3       |
| C20orf133  |
| CACNA1C    |
| CADM2      |
| DHH        |
| LMAN2L     |
| LOC646089  |
| MACROD2    |
| MIR2113    |
| ODZ4       |
| PBRM1      |
| POU3F2     |
| PPM1M      |
| PTGFR      |
| SYNE1      |
| TRANK1     |

Supplementary Table S9: Following genes are overlapping genes between kME genes in 11 WGCNA modules associated with BD (this study) and PGC schizophrenia study (PGC 2014)

| GeneName |
|----------|
| SEPT3    |
| ABCB9    |
| ADAMTSL3 |
| AKT3     |
| ALDOA    |
| APH1A    |
| APOPT1   |
| ARL6IP4  |
| ATP2A2   |
| ATPAF2   |
| BAG5     |
| C10orf32 |
| C12orf65 |
| C16orf86 |
| C1orf54  |
| C2orf69  |
| C3orf49  |
| CACNA1I  |
| CENPT    |
| CKAP5    |
| CLCN3    |
| CLU      |
| CNKSR2   |
| CNNM2    |
| CNOT1    |
| CNTN4    |
| CSMD1    |
| CTRL     |
| CUL3     |
| CYP17A1  |
| DGKI     |
| DNAJC19  |
| EDC4     |
| EPC2     |
| EPHX2    |
| ESRP2    |
| FAM53C   |
| FURIN    |
| FUT9     |
| FXR1     |
| GATAD2A  |
| GFO2     |
| GIGYF2   |
| GRAMD1B  |
| GRIA1    |
| GRIN2A   |
| HARS     |
| HIRIP3   |
| HSPD1    |
| IGSF9B   |
| ITIH4    |
| KCNB1    |
| KCNJ13   |
| L3MBTL2  |
| LUZP2    |
| MAN2A2   |
| MARS2    |
| MDK      |
| MED19    |
| MEF2C    |
| MMP16    |
| NCAN     |
| NDUFA6   |
| NEK1     |
| NGEF     |
| NISCH    |
| NLGN4X   |
| NT5C2    |
| OSBPL3   |
| PBX4     |
| PCCB     |
| PCDHA2   |
| PCDHA3   |
| PCDHA4   |
| PCDHA5   |

|          |
|----------|
| PCDHA7   |
| PCGF6    |
| PITPNM2  |
| PLA2G15  |
| PLEKH01  |
| PPP1R16B |
| PPP4C    |
| PRKD1    |
| PTN      |
| RAI1     |
| RANBP10  |
| RANGAP1  |
| RG56     |
| RRAS     |
| SATB2    |
| SDCCAG8  |
| SLC12A4  |
| SLC7A6   |
| SMG6     |
| SNX19    |
| TAC3     |
| TAOK2    |
| TBC1D5   |
| TCF20    |
| THAP11   |
| TMEM219  |
| TMTC1    |
| TSNARE1  |
| TYW5     |
| WDR55    |
| ZDHH5    |
| ZFYVE21  |
| ZSCAN2   |

Supplementary Table S10: Following genes are overlapping genes between kME genes in 11 WGCNA modules associated with BD (this study) and Autism study (Rubeis et al., 2014)

| GeneName |
|----------|
| ADNP     |
| ANK2     |
| APH1A    |
| ASH1L    |
| ASXL3    |
| BCL11A   |
| CUL3     |
| DYRK1A   |
| GABRB3   |
| GRIN2B   |
| MYT1L    |
| NR3C2    |
| PTEN     |
| SCN2A    |
| SETD5    |
| SYNGAP1  |
| TBR1     |
| TRIO     |
